# Supplementary material for: Chemical composition of modern and fossil Hippopotamid teeth and implications for paleoenvironmental reconstructions and enamel formation – Part 1: Major and minor element variation
Source: Copernicus journal article supplement (doi:10.5194/bg-9-119-2012), 2012-01-06
Supplement: Supplementary file 1 [file bg-9-119-2012-supplement.zip]

**S-276**      *Hippopotamus amphibius*      Molar M3      Zoo      Collection Inst. Geosciences, University Mainz, Germany

| Profile    | Mineral | Distance<br>( $\mu\text{m}$ ) | P2O5  | SiO2 | FeO  | CaO   | MgO  | MnO  | SrO  | Na2O | F    | Cl   | SO3  | K2O  | Al2O3 | H2O  | Total |
|------------|---------|-------------------------------|-------|------|------|-------|------|------|------|------|------|------|------|------|-------|------|-------|
| S-276 L-01 | Enamel  | 100                           | 37.59 | 0.05 | 0.00 | 50.83 | 0.29 | 0.00 | 0.07 | 1.05 | 0.20 | 0.29 | 0.11 | 0.04 | 0.05  | 1.42 | 92.01 |
| S-276 L-02 | Enamel  | 600                           | 38.42 | 0.00 | 0.00 | 50.83 | 0.34 | 0.00 | 0.03 | 1.06 | 0.13 | 0.29 | 0.00 | 0.03 | 0.00  | 1.47 | 92.59 |
| S-276 L-03 | Enamel  | 1100                          | 37.89 | 0.07 | 0.04 | 50.79 | 0.32 | 0.06 | 0.06 | 1.04 | 0.19 | 0.29 | 0.09 | 0.03 | 0.00  | 1.44 | 92.30 |
| S-276 L-04 | Enamel  | 1600                          | 38.53 | 0.00 | 0.00 | 50.66 | 0.33 | 0.00 | 0.07 | 1.11 | 0.20 | 0.28 | 0.00 | 0.02 | 0.00  | 1.44 | 92.63 |
| S-276 L-05 | Enamel  | 2100                          | 38.60 | 0.00 | 0.00 | 50.74 | 0.33 | 0.00 | 0.06 | 1.06 | 0.21 | 0.29 | 0.05 | 0.04 | 0.03  | 1.44 | 92.86 |
| S-276 L-06 | Enamel  | 2600                          | 38.27 | 0.00 | 0.00 | 50.96 | 0.36 | 0.00 | 0.05 | 1.07 | 0.20 | 0.28 | 0.07 | 0.02 | 0.00  | 1.44 | 92.73 |
| S-276 L-07 | Enamel  | 3100                          | 38.62 | 0.00 | 0.00 | 50.75 | 0.36 | 0.00 | 0.06 | 1.14 | 0.18 | 0.26 | 0.00 | 0.03 | 0.00  | 1.46 | 92.85 |
| S-276 L-08 | Enamel  | 3600                          | 38.45 | 0.00 | 0.04 | 50.92 | 0.34 | 0.00 | 0.05 | 1.05 | 0.19 | 0.25 | 0.05 | 0.05 | 0.00  | 1.45 | 92.84 |
| S-276 L-09 | Enamel  | 4100                          | 37.93 | 0.00 | 0.00 | 50.96 | 0.37 | 0.00 | 0.07 | 1.21 | 0.19 | 0.26 | 0.08 | 0.03 | 0.00  | 1.44 | 92.54 |
| S-276 L-10 | Enamel  | 4600                          | 38.26 | 0.00 | 0.00 | 50.80 | 0.35 | 0.00 | 0.08 | 1.18 | 0.18 | 0.26 | 0.00 | 0.04 | 0.00  | 1.45 | 92.60 |
| S-276 L-11 | Enamel  | 5100                          | 38.23 | 0.07 | 0.00 | 51.21 | 0.37 | 0.00 | 0.05 | 1.09 | 0.16 | 0.26 | 0.05 | 0.02 | 0.04  | 1.47 | 93.01 |
| S-276 L-12 | Enamel  | 5600                          | 38.15 | 0.00 | 0.00 | 50.83 | 0.38 | 0.00 | 0.08 | 1.20 | 0.21 | 0.26 | 0.00 | 0.00 | 0.00  | 1.44 | 92.55 |
| S-276 L-13 | Enamel  | 6100                          | 38.74 | 0.00 | 0.00 | 51.02 | 0.36 | 0.00 | 0.06 | 1.20 | 0.21 | 0.24 | 0.08 | 0.04 | 0.00  | 1.46 | 93.40 |
| S-276 L-14 | Enamel  | 6600                          | 37.95 | 0.00 | 0.00 | 50.69 | 0.37 | 0.00 | 0.07 | 1.16 | 0.14 | 0.26 | 0.00 | 0.03 | 0.00  | 1.46 | 92.12 |
| S-276 L-15 | Enamel  | 7100                          | 38.53 | 0.00 | 0.00 | 50.88 | 0.38 | 0.00 | 0.08 | 1.13 | 0.20 | 0.26 | 0.06 | 0.02 | 0.00  | 1.45 | 92.98 |
| S-276 L-16 | Enamel  | 7600                          | 38.61 | 0.00 | 0.00 | 51.18 | 0.40 | 0.00 | 0.05 | 1.18 | 0.18 | 0.25 | 0.00 | 0.04 | 0.03  | 1.46 | 93.38 |
| S-276 L-17 | Enamel  | 8100                          | 38.66 | 0.00 | 0.00 | 50.98 | 0.37 | 0.00 | 0.05 | 1.10 | 0.19 | 0.26 | 0.00 | 0.02 | 0.04  | 1.46 | 93.14 |
| S-276 L-18 | Enamel  | 8600                          | 38.04 | 0.00 | 0.00 | 50.82 | 0.39 | 0.00 | 0.04 | 1.09 | 0.18 | 0.26 | 0.05 | 0.02 | 0.00  | 1.45 | 92.33 |
| S-276 L-19 | Enamel  | 9100                          | 38.67 | 0.03 | 0.04 | 50.95 | 0.38 | 0.00 | 0.05 | 1.12 | 0.22 | 0.24 | 0.05 | 0.00 | 0.00  | 1.45 | 93.20 |
| S-276 L-20 | Enamel  | 9600                          | 39.27 | 0.00 | 0.00 | 50.80 | 0.37 | 0.00 | 0.05 | 1.15 | 0.23 | 0.22 | 0.00 | 0.03 | 0.00  | 1.46 | 93.58 |
| S-276 L-21 | Enamel  | 10100                         | 38.27 | 0.00 | 0.00 | 50.73 | 0.37 | 0.00 | 0.04 | 1.14 | 0.17 | 0.21 | 0.07 | 0.04 | 0.03  | 1.47 | 92.52 |
| S-276 L-22 | Enamel  | 10600                         | 39.05 | 0.05 | 0.00 | 50.55 | 0.36 | 0.00 | 0.06 | 1.12 | 0.19 | 0.22 | 0.05 | 0.02 | 0.05  | 1.47 | 93.19 |
| S-276 L-23 | Enamel  | 11100                         | 38.81 | 0.05 | 0.05 | 50.74 | 0.36 | 0.00 | 0.03 | 1.20 | 0.19 | 0.24 | 0.00 | 0.00 | 0.03  | 1.46 | 93.16 |
| S-276 L-24 | Enamel  | 11600                         | 38.46 | 0.00 | 0.00 | 51.05 | 0.34 | 0.00 | 0.05 | 1.12 | 0.20 | 0.24 | 0.06 | 0.04 | 0.04  | 1.46 | 93.05 |
| S-276 L-25 | Enamel  | 12100                         | 38.80 | 0.00 | 0.00 | 50.90 | 0.35 | 0.00 | 0.05 | 1.12 | 0.21 | 0.24 | 0.00 | 0.00 | 0.00  | 1.46 | 93.13 |
| S-276 L-26 | Enamel  | 12600                         | 37.91 | 0.00 | 0.00 | 50.77 | 0.33 | 0.00 | 0.07 | 1.19 | 0.19 | 0.23 | 0.06 | 0.03 | 0.00  | 1.45 | 92.22 |
| S-276 L-27 | Enamel  | 13100                         | 38.42 | 0.44 | 0.00 | 50.74 | 0.35 | 0.00 | 0.04 | 1.17 | 0.20 | 0.28 | 0.06 | 0.06 | 0.04  | 1.45 | 93.25 |
| S-276 L-28 | Enamel  | 13600                         | 38.49 | 0.05 | 0.04 | 50.96 | 0.41 | 0.00 | 0.06 | 1.22 | 0.18 | 0.25 | 0.07 | 0.05 | 0.00  | 1.47 | 93.24 |
| S-276 L-29 | Enamel  | 14100                         | 38.67 | 0.06 | 0.00 | 51.02 | 0.38 | 0.00 | 0.05 | 1.16 | 0.22 | 0.25 | 0.06 | 0.04 | 0.00  | 1.45 | 93.34 |
| S-276 L-30 | Enamel  | 14600                         | 38.85 | 0.00 | 0.00 | 50.91 | 0.36 | 0.00 | 0.03 | 1.20 | 0.19 | 0.24 | 0.00 | 0.03 | 0.00  | 1.47 | 93.28 |
| S-276 L-31 | Enamel  | 15100                         | 38.13 | 0.15 | 0.00 | 50.84 | 0.36 | 0.00 | 0.04 | 1.24 | 0.19 | 0.24 | 0.00 | 0.04 | 0.00  | 1.45 | 92.67 |
| S-276 L-32 | Enamel  | 15600                         | 37.97 | 0.00 | 0.05 | 50.52 | 0.36 | 0.00 | 0.06 | 1.22 | 0.20 | 0.22 | 0.05 | 0.02 | 0.00  | 1.44 | 92.11 |

| <b>S-276</b>   | <i>Hippopotamus amphibius</i> | Molar M3                                       | Zoo         | Collection Inst. Geosciences, University Mainz, Germany |            |            |            |            |            |             |          |           |            |            |              |            |              |
|----------------|-------------------------------|------------------------------------------------|-------------|---------------------------------------------------------|------------|------------|------------|------------|------------|-------------|----------|-----------|------------|------------|--------------|------------|--------------|
| <b>Profile</b> | <b>Mineral</b>                | <b>Distance<br/>(<math>\mu\text{m}</math>)</b> | <b>P2O5</b> | <b>SiO2</b>                                             | <b>FeO</b> | <b>CaO</b> | <b>MgO</b> | <b>MnO</b> | <b>SrO</b> | <b>Na2O</b> | <b>F</b> | <b>Cl</b> | <b>SO3</b> | <b>K2O</b> | <b>Al2O3</b> | <b>H2O</b> | <b>Total</b> |
| S-276 L-33     | Enamel                        | 16100                                          | 38.19       | 1.28                                                    | 0.00       | 50.24      | 0.35       | 0.00       | 0.07       | 1.24        | 0.17     | 0.21      | 0.05       | 0.04       | 0.00         | 1.49       | 93.34        |
| S-276 L-34     | Enamel                        | 16600                                          | 38.31       | 0.00                                                    | 0.00       | 50.28      | 0.36       | 0.00       | 0.07       | 1.24        | 0.24     | 0.20      | 0.00       | 0.04       | 0.00         | 1.44       | 92.19        |
| S-276 L-35     | Enamel                        | 17100                                          | 38.11       | 2.30                                                    | 0.00       | 50.18      | 0.34       | 0.00       | 0.08       | 1.19        | 0.18     | 0.22      | 0.05       | 0.03       | 0.05         | 1.50       | 94.24        |
| S-276 L-36     | Enamel                        | 17600                                          | 38.07       | 0.00                                                    | 0.00       | 50.67      | 0.38       | 0.00       | 0.07       | 1.29        | 0.19     | 0.20      | 0.08       | 0.00       | 0.00         | 1.46       | 92.41        |
| S-276 L-37     | Enamel                        | 18100                                          | 38.28       | 0.00                                                    | 0.00       | 50.70      | 0.39       | 0.00       | 0.04       | 1.19        | 0.19     | 0.21      | 0.00       | 0.03       | 0.00         | 1.46       | 92.49        |
| S-276 L-38     | Enamel                        | 18600                                          | 38.41       | 0.15                                                    | 0.00       | 50.73      | 0.37       | 0.00       | 0.06       | 1.27        | 0.24     | 0.21      | 0.00       | 0.06       | 0.00         | 1.45       | 92.94        |
| S-276 L-39     | Enamel                        | 19100                                          | 38.56       | 0.00                                                    | 0.00       | 50.95      | 0.32       | 0.00       | 0.09       | 1.25        | 0.18     | 0.20      | 0.00       | 0.04       | 0.00         | 1.48       | 93.06        |
| S-276 L-40     | Enamel                        | 19600                                          | 37.90       | 0.00                                                    | 0.00       | 50.74      | 0.36       | 0.00       | 0.05       | 1.25        | 0.21     | 0.20      | 0.00       | 0.03       | 0.00         | 1.44       | 92.18        |
| S-276 L-41     | Enamel                        | 20100                                          | 37.94       | 0.04                                                    | 0.06       | 50.71      | 0.37       | 0.00       | 0.08       | 1.27        | 0.20     | 0.20      | 0.00       | 0.03       | 0.00         | 1.45       | 92.35        |
| S-276 L-42     | Enamel                        | 20600                                          | 38.78       | 0.03                                                    | 0.00       | 51.07      | 0.36       | 0.00       | 0.05       | 1.20        | 0.22     | 0.20      | 0.00       | 0.03       | 0.00         | 1.46       | 93.41        |
| S-276 L-43     | Enamel                        | 21100                                          | 38.02       | 0.07                                                    | 0.04       | 50.57      | 0.34       | 0.00       | 0.06       | 1.19        | 0.16     | 0.19      | 0.00       | 0.04       | 0.00         | 1.47       | 92.14        |
| S-276 L-44     | Enamel                        | 21600                                          | 38.37       | 0.00                                                    | 0.00       | 50.94      | 0.35       | 0.00       | 0.05       | 1.31        | 0.22     | 0.18      | 0.00       | 0.03       | 0.00         | 1.46       | 92.92        |
| S-276 L-45     | Enamel                        | 22100                                          | 37.57       | 0.00                                                    | 0.00       | 50.95      | 0.38       | 0.06       | 0.08       | 1.29        | 0.22     | 0.19      | 0.05       | 0.04       | 0.00         | 1.44       | 92.27        |
| S-276 L-46     | Enamel                        | 22600                                          | 38.43       | 0.00                                                    | 0.00       | 51.04      | 0.41       | 0.00       | 0.07       | 1.20        | 0.24     | 0.20      | 0.00       | 0.03       | 0.04         | 1.45       | 93.10        |
| S-276 L-47     | Enamel                        | 23100                                          | 37.89       | 0.00                                                    | 0.00       | 50.91      | 0.38       | 0.00       | 0.05       | 1.25        | 0.23     | 0.18      | 0.00       | 0.04       | 0.05         | 1.44       | 92.41        |
| S-276 L-48     | Enamel                        | 23600                                          | 38.08       | 0.00                                                    | 0.00       | 50.91      | 0.37       | 0.00       | 0.05       | 1.20        | 0.20     | 0.17      | 0.00       | 0.04       | 0.03         | 1.46       | 92.51        |
| S-276 L-49     | Enamel                        | 24100                                          | 37.50       | 0.00                                                    | 0.00       | 51.03      | 0.36       | 0.00       | 0.04       | 1.18        | 0.24     | 0.19      | 0.06       | 0.04       | 0.03         | 1.43       | 92.10        |
| S-276 L-50     | Enamel                        | 24600                                          | 38.26       | 0.03                                                    | 0.00       | 51.31      | 0.37       | 0.00       | 0.07       | 1.15        | 0.16     | 0.19      | 0.00       | 0.00       | 0.05         | 1.48       | 93.06        |
| S-276 L-51     | Enamel                        | 25100                                          | 38.74       | 0.10                                                    | 0.00       | 51.51      | 0.35       | 0.00       | 0.06       | 1.16        | 0.15     | 0.21      | 0.00       | 0.02       | 0.00         | 1.50       | 93.80        |
| S-276 L-52     | Enamel                        | 25600                                          | 38.55       | 0.00                                                    | 0.00       | 51.17      | 0.39       | 0.00       | 0.05       | 1.05        | 0.20     | 0.20      | 0.05       | 0.03       | 0.00         | 1.47       | 93.16        |
| S-276 L-53     | Enamel                        | 26100                                          | 38.81       | 0.04                                                    | 0.00       | 51.26      | 0.41       | 0.00       | 0.05       | 1.05        | 0.17     | 0.23      | 0.00       | 0.02       | 0.00         | 1.48       | 93.50        |
| S-276 L-54     | Enamel                        | 26600                                          | 38.70       | 0.00                                                    | 0.00       | 51.50      | 0.34       | 0.00       | 0.06       | 1.09        | 0.22     | 0.22      | 0.00       | 0.04       | 0.00         | 1.46       | 93.63        |
| S-276 L-55     | Enamel                        | 27100                                          | 38.38       | 0.00                                                    | 0.04       | 51.79      | 0.34       | 0.00       | 0.06       | 1.09        | 0.21     | 0.20      | 0.06       | 0.03       | 0.05         | 1.47       | 93.72        |
| S-276 L-56     | Enamel                        | 27600                                          | 37.88       | 0.08                                                    | 0.00       | 51.26      | 0.34       | 0.00       | 0.03       | 1.09        | 0.18     | 0.22      | 0.10       | 0.04       | 0.06         | 1.46       | 92.73        |
| S-276 L-57     | Enamel                        | 28100                                          | 37.88       | 0.11                                                    | 0.04       | 51.40      | 0.33       | 0.00       | 0.04       | 1.04        | 0.25     | 0.20      | 0.14       | 0.02       | 0.07         | 1.44       | 92.95        |
| S-276 L-58     | Enamel                        | 28600                                          | 38.17       | 0.96                                                    | 0.00       | 51.56      | 0.37       | 0.00       | 0.06       | 1.04        | 0.20     | 0.21      | 0.10       | 0.03       | 0.04         | 1.48       | 94.22        |
| S-276 L-59     | Enamel                        | 29100                                          | 37.35       | 0.08                                                    | 0.00       | 51.13      | 0.32       | 0.00       | 0.08       | 0.98        | 0.22     | 0.21      | 0.09       | 0.00       | 0.07         | 1.43       | 91.97        |
| S-276 L-60     | Enamel                        | 29600                                          | 37.73       | 0.00                                                    | 0.04       | 50.79      | 0.38       | 0.00       | 0.05       | 1.20        | 0.22     | 0.21      | 0.06       | 0.04       | 0.00         | 1.43       | 92.15        |
| S-276 L-61     | Enamel                        | 30100                                          | 38.19       | 0.25                                                    | 0.00       | 51.59      | 0.37       | 0.00       | 0.07       | 1.13        | 0.18     | 0.19      | 0.08       | 0.03       | 0.03         | 1.48       | 93.59        |
| S-276 L-62     | Enamel                        | 30600                                          | 37.53       | 0.00                                                    | 0.00       | 50.56      | 0.35       | 0.00       | 0.05       | 1.16        | 0.21     | 0.18      | 0.08       | 0.00       | 0.00         | 1.44       | 91.56        |
| S-276 L-63     | Enamel                        | 31100                                          | 37.68       | 0.00                                                    | 0.00       | 51.13      | 0.36       | 0.00       | 0.03       | 1.24        | 0.18     | 0.20      | 0.06       | 0.03       | 0.00         | 1.46       | 92.36        |

| <b>S-276</b>   | <i>Hippopotamus amphibius</i> |                                                | Molar M3    | Zoo         | Collection Inst. Geosciences, University Mainz, Germany |            |            |            |            |             |          |           |            |            |              |            |              |
|----------------|-------------------------------|------------------------------------------------|-------------|-------------|---------------------------------------------------------|------------|------------|------------|------------|-------------|----------|-----------|------------|------------|--------------|------------|--------------|
| <b>Profile</b> | <b>Mineral</b>                | <b>Distance<br/>(<math>\mu\text{m}</math>)</b> | <b>P2O5</b> | <b>SiO2</b> | <b>FeO</b>                                              | <b>CaO</b> | <b>MgO</b> | <b>MnO</b> | <b>SrO</b> | <b>Na2O</b> | <b>F</b> | <b>Cl</b> | <b>SO3</b> | <b>K2O</b> | <b>Al2O3</b> | <b>H2O</b> | <b>Total</b> |
| S-276 L-64     | Enamel                        | 31600                                          | 38.01       | 0.05        | 0.00                                                    | 51.26      | 0.37       | 0.00       | 0.05       | 1.14        | 0.21     | 0.19      | 0.05       | 0.02       | 0.00         | 1.46       | 92.80        |
| S-276 L-65     | Enamel                        | 32100                                          | 37.83       | 1.70        | 0.00                                                    | 51.05      | 0.36       | 0.00       | 0.07       | 1.12        | 0.22     | 0.22      | 0.06       | 0.00       | 0.06         | 1.47       | 94.15        |
| S-276 L-66     | Enamel                        | 32600                                          | 37.69       | 0.00        | 0.04                                                    | 51.43      | 0.37       | 0.00       | 0.06       | 1.18        | 0.16     | 0.21      | 0.06       | 0.03       | 0.00         | 1.47       | 92.70        |
| S-276 L-67     | Enamel                        | 33100                                          | 38.09       | 0.00        | 0.00                                                    | 51.58      | 0.36       | 0.00       | 0.03       | 1.07        | 0.18     | 0.20      | 0.05       | 0.03       | 0.04         | 1.47       | 93.10        |
| S-276 L-68     | Enamel                        | 33600                                          | 37.94       | 0.00        | 0.00                                                    | 51.86      | 0.35       | 0.00       | 0.05       | 1.17        | 0.17     | 0.20      | 0.07       | 0.05       | 0.00         | 1.48       | 93.34        |
| S-276 L-69     | Enamel                        | 34100                                          | 38.01       | 0.00        | 0.05                                                    | 51.97      | 0.36       | 0.00       | 0.06       | 1.10        | 0.22     | 0.22      | 0.07       | 0.04       | 0.00         | 1.45       | 93.56        |
| S-276 L-70     | Enamel                        | 34600                                          | 38.03       | 0.00        | 0.04                                                    | 51.51      | 0.37       | 0.00       | 0.07       | 1.15        | 0.18     | 0.20      | 0.00       | 0.04       | 0.03         | 1.47       | 93.08        |
| S-276 L-71     | Enamel                        | 35100                                          | 38.19       | 0.00        | 0.00                                                    | 51.62      | 0.34       | 0.00       | 0.06       | 1.17        | 0.23     | 0.21      | 0.05       | 0.05       | 0.00         | 1.45       | 93.36        |
| S-276 L-72     | Enamel                        | 35600                                          | 37.48       | 0.08        | 0.00                                                    | 51.32      | 0.35       | 0.00       | 0.04       | 1.21        | 0.22     | 0.19      | 0.06       | 0.00       | 0.05         | 1.44       | 92.44        |
| S-276 L-73     | Enamel                        | 36100                                          | 37.45       | 0.11        | 0.00                                                    | 51.24      | 0.38       | 0.00       | 0.05       | 1.12        | 0.17     | 0.21      | 0.07       | 0.04       | 0.05         | 1.45       | 92.34        |
| S-276 L-74     | Enamel                        | 36600                                          | 38.70       | 0.00        | 0.00                                                    | 51.74      | 0.35       | 0.00       | 0.04       | 1.24        | 0.13     | 0.21      | 0.00       | 0.07       | 0.04         | 1.51       | 94.03        |
| S-276 L-75     | Enamel                        | 37100                                          | 37.94       | 0.15        | 0.00                                                    | 51.92      | 0.35       | 0.00       | 0.06       | 1.22        | 0.18     | 0.20      | 0.11       | 0.04       | 0.05         | 1.47       | 93.69        |
| S-276 L-76     | Enamel                        | 37600                                          | 38.26       | 0.00        | 0.00                                                    | 51.59      | 0.42       | 0.00       | 0.06       | 1.26        | 0.16     | 0.16      | 0.00       | 0.04       | 0.00         | 1.49       | 93.44        |
| S-276 L-77     | Enamel                        | 38100                                          | 37.75       | 0.00        | 0.00                                                    | 51.53      | 0.37       | 0.00       | 0.04       | 1.18        | 0.18     | 0.18      | 0.05       | 0.03       | 0.05         | 1.47       | 92.82        |
| S-276 L-78     | Enamel                        | 38600                                          | 39.15       | 0.00        | 0.00                                                    | 51.55      | 0.37       | 0.00       | 0.06       | 1.19        | 0.21     | 0.18      | 0.00       | 0.04       | 0.03         | 1.49       | 94.27        |
| S-276 L-79     | Enamel                        | 39100                                          | 38.52       | 0.07        | 0.00                                                    | 51.56      | 0.37       | 0.00       | 0.07       | 1.19        | 0.21     | 0.17      | 0.05       | 0.03       | 0.04         | 1.47       | 93.77        |
| S-276 L-80     | Enamel                        | 39600                                          | 38.78       | 0.00        | 0.00                                                    | 51.46      | 0.37       | 0.00       | 0.06       | 1.21        | 0.22     | 0.17      | 0.05       | 0.04       | 0.00         | 1.48       | 93.83        |
| S-276 L-81     | Enamel                        | 40100                                          | 38.99       | 0.00        | 0.00                                                    | 51.93      | 0.37       | 0.00       | 0.07       | 1.25        | 0.18     | 0.17      | 0.00       | 0.03       | 0.00         | 1.50       | 94.49        |
| S-276 L-82     | Enamel                        | 40600                                          | 38.55       | 0.15        | 0.00                                                    | 51.66      | 0.35       | 0.00       | 0.04       | 1.10        | 0.22     | 0.17      | 0.09       | 0.00       | 0.07         | 1.48       | 93.87        |
| S-276 L-83     | Enamel                        | 41100                                          | 39.17       | 0.00        | 0.00                                                    | 51.78      | 0.37       | 0.00       | 0.06       | 1.15        | 0.22     | 0.17      | 0.00       | 0.03       | 0.00         | 1.49       | 94.43        |
| S-276 L-84     | Enamel                        | 41600                                          | 39.61       | 0.05        | 0.00                                                    | 51.63      | 0.37       | 0.00       | 0.10       | 1.11        | 0.19     | 0.17      | 0.07       | 0.04       | 0.06         | 1.51       | 94.90        |
| S-276 L-85     | Enamel                        | 42100                                          | 39.26       | 0.05        | 0.00                                                    | 51.92      | 0.33       | 0.00       | 0.05       | 1.13        | 0.23     | 0.20      | 0.05       | 0.00       | 0.07         | 1.48       | 94.75        |
| S-276 L-86     | Enamel                        | 42600                                          | 38.93       | 0.00        | 0.00                                                    | 51.95      | 0.34       | 0.00       | 0.04       | 1.25        | 0.21     | 0.18      | 0.07       | 0.04       | 0.00         | 1.49       | 94.50        |
| S-276 L-87     | Enamel                        | 43100                                          | 39.75       | 0.27        | 0.04                                                    | 51.42      | 0.34       | 0.00       | 0.05       | 1.28        | 0.21     | 0.16      | 0.05       | 0.03       | 0.00         | 1.51       | 95.11        |
| S-276 L-88     | Enamel                        | 43600                                          | 39.31       | 0.00        | 0.00                                                    | 51.67      | 0.39       | 0.00       | 0.04       | 1.22        | 0.19     | 0.16      | 0.00       | 0.03       | 0.00         | 1.50       | 94.51        |
| S-276 L-89     | Enamel                        | 44100                                          | 39.31       | 0.00        | 0.00                                                    | 51.98      | 0.37       | 0.00       | 0.06       | 1.15        | 0.16     | 0.16      | 0.06       | 0.03       | 0.05         | 1.52       | 94.85        |
| S-276 L-90     | Enamel                        | 44600                                          | 39.60       | 0.06        | 0.00                                                    | 51.65      | 0.36       | 0.00       | 0.06       | 1.22        | 0.21     | 0.15      | 0.00       | 0.04       | 0.00         | 1.50       | 94.85        |
| S-276 L-91     | Enamel                        | 45100                                          | 39.72       | 0.04        | 0.07                                                    | 51.62      | 0.37       | 0.00       | 0.06       | 1.37        | 0.19     | 0.17      | 0.00       | 0.05       | 0.05         | 1.51       | 95.22        |
| S-276 L-92     | Enamel                        | 45600                                          | 39.71       | 0.00        | 0.00                                                    | 51.92      | 0.38       | 0.00       | 0.06       | 1.27        | 0.21     | 0.24      | 0.00       | 0.05       | 0.05         | 1.49       | 95.38        |
| S-276 L-93     | Enamel                        | 46100                                          | 39.91       | 0.00        | 0.00                                                    | 52.12      | 0.37       | 0.00       | 0.03       | 1.18        | 0.22     | 0.21      | 0.06       | 0.05       | 0.05         | 1.50       | 95.69        |
| S-276 L-94     | Enamel                        | 46600                                          | 40.02       | 0.00        | 0.04                                                    | 51.83      | 0.37       | 0.00       | 0.06       | 1.23        | 0.18     | 0.19      | 0.00       | 0.04       | 0.00         | 1.52       | 95.48        |

**S-276**      *Hippopotamus amphibius*      Molar M3      Zoo      Collection Inst. Geosciences, University Mainz, Germany

| <b>Profile</b> | <b>Mineral</b> | <b>Distance<br/>(<math>\mu\text{m}</math>)</b> | <b>P2O5</b> | <b>SiO2</b> | <b>FeO</b> | <b>CaO</b> | <b>MgO</b> | <b>MnO</b> | <b>SrO</b> | <b>Na2O</b> | <b>F</b> | <b>Cl</b> | <b>SO3</b> | <b>K2O</b> | <b>Al2O3</b> | <b>H2O</b> | <b>Total</b> |
|----------------|----------------|------------------------------------------------|-------------|-------------|------------|------------|------------|------------|------------|-------------|----------|-----------|------------|------------|--------------|------------|--------------|
| S-276 L-95     | Enamel         | 47100                                          | 39.97       | 0.08        | 0.00       | 51.90      | 0.37       | 0.00       | 0.06       | 1.25        | 0.22     | 0.23      | 0.00       | 0.03       | 0.00         | 1.50       | 95.59        |
| S-276 L-96     | Enamel         | 47600                                          | 39.49       | 0.04        | 0.00       | 51.57      | 0.36       | 0.00       | 0.03       | 1.33        | 0.21     | 0.23      | 0.00       | 0.07       | 0.00         | 1.49       | 94.82        |
| S-276 L-97     | Enamel         | 48100                                          | 39.83       | 0.04        | 0.00       | 51.62      | 0.37       | 0.00       | 0.08       | 1.40        | 0.13     | 0.20      | 0.00       | 0.05       | 0.00         | 1.53       | 95.26        |
| S-276 L-98     | Enamel         | 48600                                          | 39.25       | 0.00        | 0.00       | 51.23      | 0.38       | 0.00       | 0.00       | 1.35        | 0.16     | 0.17      | 0.05       | 0.08       | 0.00         | 1.51       | 94.17        |
| S-276 L-99     | Enamel         | 49100                                          | 39.45       | 0.00        | 0.00       | 51.75      | 0.38       | 0.00       | 0.03       | 1.40        | 0.18     | 0.18      | 0.05       | 0.03       | 0.00         | 1.51       | 94.96        |
| S-276 L-100    | Enamel         | 49600                                          | 38.57       | 0.00        | 0.00       | 50.12      | 0.51       | 0.00       | 0.04       | 1.50        | 0.16     | 0.12      | 0.12       | 0.00       | 0.00         | 1.50       | 92.64        |
| S-276 L-101    | Enamel         | 50100                                          | 38.76       | 0.08        | 0.00       | 50.79      | 0.48       | 0.00       | 0.08       | 1.24        | 0.19     | 0.21      | 0.10       | 0.04       | 0.00         | 1.47       | 93.44        |
| S-276 L-102    | Enamel         | 50600                                          | 39.29       | 0.00        | 0.00       | 50.80      | 0.35       | 0.00       | 0.04       | 1.21        | 0.15     | 0.25      | 0.06       | 0.03       | 0.00         | 1.49       | 93.67        |

## S-276

| Profile     | Mineral | Distance<br>( $\mu\text{m}$ ) | P2O5  | SiO2 | FeO  | CaO   | MgO  | MnO  | SrO  | Na2O | F    | Cl   | SO3  | K2O  | Al2O3 | H2O  | Total |
|-------------|---------|-------------------------------|-------|------|------|-------|------|------|------|------|------|------|------|------|-------|------|-------|
| 5276 1AB 1  | enamel  | 50                            | 37.83 | 0.07 | 0.04 | 51.07 | 0.28 | 0.00 | 0.04 | 0.83 | 0.12 | 0.62 | 0.08 | 0.00 | 0.02  | 1.37 | 92.36 |
| 5276 1AB 2  | enamel  | 126                           | 38.50 | 0.00 | 0.00 | 51.27 | 0.23 | 0.05 | 0.04 | 0.80 | 0.14 | 0.63 | 0.06 | 0.04 | 0.00  | 1.37 | 93.13 |
| 5276 1AB 3  | enamel  | 252                           | 39.41 | 0.00 | 0.00 | 51.17 | 0.40 | 0.04 | 0.04 | 0.84 | 0.12 | 0.55 | 0.06 | 0.01 | 0.05  | 1.42 | 94.11 |
| 5276 1AB 4  | enamel  | 378                           | 38.57 | 0.08 | 0.04 | 51.53 | 0.24 | 0.00 | 0.03 | 0.97 | 0.16 | 0.56 | 0.11 | 0.00 | 0.00  | 1.39 | 93.67 |
| 5276 1AB 5  | enamel  | 504                           | 38.78 | 0.00 | 0.00 | 51.00 | 0.26 | 0.00 | 0.06 | 0.87 | 0.14 | 0.53 | 0.06 | 0.00 | 0.00  | 1.40 | 93.09 |
| 5276 1AB 6  | enamel  | 630                           | 38.87 | 0.09 | 0.00 | 51.31 | 0.21 | 0.00 | 0.04 | 1.02 | 0.15 | 0.51 | 0.06 | 0.02 | 0.00  | 1.41 | 93.68 |
| 5276 1AB 7  | enamel  | 756                           | 38.98 | 0.25 | 0.00 | 51.01 | 0.28 | 0.00 | 0.05 | 0.92 | 0.09 | 0.46 | 0.00 | 0.02 | 0.04  | 1.45 | 93.54 |
| 5276 1AB 8  | enamel  | 882                           | 38.33 | 0.20 | 0.00 | 50.95 | 0.29 | 0.00 | 0.03 | 0.96 | 0.19 | 0.44 | 0.09 | 0.04 | 0.00  | 1.39 | 92.91 |
| 5276 1AB 9  | enamel  | 1008                          | 38.59 | 0.00 | 0.00 | 50.70 | 0.32 | 0.00 | 0.04 | 1.00 | 0.13 | 0.41 | 0.06 | 0.02 | 0.03  | 1.43 | 92.73 |
| 5276 1AB 10 | enamel  | 1134                          | 37.92 | 0.15 | 0.00 | 50.14 | 0.33 | 0.00 | 0.08 | 1.03 | 0.10 | 0.40 | 0.00 | 0.03 | 0.02  | 1.42 | 91.61 |
| 5276 1AB 11 | enamel  | 1260                          | 38.33 | 0.00 | 0.05 | 50.94 | 0.31 | 0.00 | 0.06 | 0.98 | 0.15 | 0.39 | 0.05 | 0.01 | 0.04  | 1.42 | 92.74 |
| 5276 1AB 12 | enamel  | 1386                          | 39.25 | 0.00 | 0.00 | 50.88 | 0.29 | 0.05 | 0.04 | 1.00 | 0.10 | 0.39 | 0.08 | 0.02 | 0.00  | 1.47 | 93.56 |
| 5276 1AB 13 | enamel  | 1512                          | 38.48 | 0.00 | 0.06 | 50.75 | 0.32 | 0.00 | 0.06 | 1.15 | 0.15 | 0.38 | 0.10 | 0.04 | 0.03  | 1.43 | 92.94 |
| 5276 1AB 14 | enamel  | 1638                          | 38.77 | 0.00 | 0.00 | 51.04 | 0.35 | 0.00 | 0.06 | 1.11 | 0.13 | 0.35 | 0.06 | 0.01 | 0.02  | 1.45 | 93.36 |
| 5276 1AB 15 | enamel  | 1764                          | 38.59 | 0.17 | 0.04 | 51.15 | 0.36 | 0.00 | 0.07 | 1.13 | 0.14 | 0.34 | 0.09 | 0.02 | 0.03  | 1.45 | 93.57 |
| 5276 1AB 16 | enamel  | 1890                          | 38.32 | 0.06 | 0.00 | 50.47 | 0.34 | 0.00 | 0.04 | 1.10 | 0.11 | 0.34 | 0.06 | 0.03 | 0.04  | 1.45 | 92.35 |
| 5276 1AB 17 | enamel  | 2016                          | 38.60 | 0.10 | 0.00 | 50.61 | 0.35 | 0.00 | 0.05 | 1.16 | 0.18 | 0.31 | 0.05 | 0.03 | 0.03  | 1.44 | 92.89 |
| 5276 1AB 18 | enamel  | 2142                          | 38.38 | 0.18 | 0.05 | 50.13 | 0.36 | 0.00 | 0.06 | 1.06 | 0.15 | 0.28 | 0.00 | 0.02 | 0.04  | 1.44 | 92.15 |
| 5276 1AB 19 | enamel  | 2268                          | 38.26 | 0.04 | 0.04 | 50.13 | 0.37 | 0.00 | 0.06 | 1.22 | 0.11 | 0.24 | 0.00 | 0.03 | 0.00  | 1.47 | 91.97 |
| 5276 1AB 20 | enamel  | 2394                          | 37.96 | 0.39 | 0.00 | 49.81 | 0.38 | 0.00 | 0.05 | 1.31 | 0.11 | 0.23 | 0.05 | 0.03 | 0.00  | 1.47 | 91.78 |
| 5276 1AB 21 | enamel  | 2520                          | 36.55 | 0.37 | 0.00 | 48.35 | 0.37 | 0.00 | 0.03 | 1.50 | 0.21 | 0.23 | 0.09 | 0.06 | 0.02  | 1.37 | 89.15 |
| 5276 1AB 22 | Dentin  | 2646                          | 33.09 | 0.20 | 0.00 | 44.72 | 2.17 | 0.00 | 0.06 | 1.11 | 0.16 | 0.23 | 0.33 | 0.02 | 0.04  | 1.29 | 83.42 |
| 5276 1AB 23 | Dentin  | 2772                          | 33.82 | 0.37 | 0.00 | 44.59 | 2.50 | 0.00 | 0.05 | 1.02 | 0.17 | 0.28 | 0.36 | 0.03 | 0.03  | 1.30 | 84.52 |
| 5276 1AB 24 | Dentin  | 2898                          | 33.01 | 0.87 | 0.00 | 42.60 | 2.52 | 0.00 | 0.04 | 1.09 | 0.18 | 0.27 | 0.38 | 0.01 | 0.05  | 1.27 | 82.30 |
| 5276 1AB 25 | Dentin  | 3024                          | 32.54 | 1.14 | 0.06 | 42.94 | 2.46 | 0.00 | 0.04 | 1.50 | 0.23 | 0.34 | 0.39 | 0.03 | 0.03  | 1.23 | 82.94 |
| 5276 1AB 26 | Dentin  | 3150                          | 28.49 | 8.40 | 0.04 | 35.69 | 2.54 | 0.00 | 0.04 | 1.97 | 0.27 | 0.38 | 0.44 | 0.05 | 0.09  | 1.19 | 79.60 |
| 5276 1AB 27 | Dentin  | 3276                          | 29.14 | 9.20 | 0.07 | 35.65 | 2.77 | 0.00 | 0.06 | 1.77 | 0.27 | 0.32 | 0.41 | 0.05 | 0.09  | 1.24 | 81.04 |
| 5276 1AB 28 | Dentin  | 3402                          | 30.09 | 5.41 | 0.00 | 38.58 | 2.83 | 0.00 | 0.03 | 2.20 | 0.22 | 0.37 | 0.45 | 0.04 | 0.08  | 1.23 | 81.53 |
| 5276 1AB 29 | Dentin  | 3528                          | 29.46 | 5.86 | 0.00 | 35.93 | 0.00 | 0.04 | 0.00 | 0.00 | 0.33 | 0.24 | 0.46 | 0.04 | 0.00  | 1.10 | 73.46 |
| 5276 1AB 30 | Dentin  | 3654                          | 26.34 | 7.75 | 0.05 | 32.69 | 0.00 | 0.00 | 0.00 | 0.00 | 0.05 | 0.26 | 0.65 | 0.05 | 0.00  | 1.16 | 68.99 |

**S-276**

| <b>Profile</b> | <b>Mineral</b> | <b>Distance<br/>(<math>\mu\text{m}</math>)</b> | <b>P2O5</b> | <b>SiO2</b> | <b>FeO</b> | <b>CaO</b> | <b>MgO</b> | <b>MnO</b> | <b>SrO</b> | <b>Na2O</b> | <b>F</b> | <b>Cl</b> | <b>SO3</b> | <b>K2O</b> | <b>Al2O3</b> | <b>H2O</b> | <b>Total</b> |
|----------------|----------------|------------------------------------------------|-------------|-------------|------------|------------|------------|------------|------------|-------------|----------|-----------|------------|------------|--------------|------------|--------------|
| 5276 2AB 1     | Cement         | 50                                             | 26.80       | 0.11        | 0.00       | 42.24      | 0.95       | 0.00       | 0.05       | 0.76        | 0.20     | 0.19      | 0.97       | 0.01       | 0.08         | 1.09       | 73.45        |
| 5276 2AB 2     | Cement         | 233                                            | 27.69       | 0.14        | 0.00       | 42.32      | 0.90       | 0.00       | 0.04       | 0.84        | 0.14     | 0.16      | 0.94       | 0.03       | 0.08         | 1.15       | 74.43        |
| 5276 2AB 3     | Cement         | 466                                            | 27.14       | 0.28        | 0.05       | 41.10      | 0.89       | 0.00       | 0.05       | 0.78        | 0.20     | 0.28      | 0.50       | 0.00       | 0.06         | 1.05       | 72.39        |
| 5276 2AB 4     | Cement         | 699                                            | 27.07       | 0.13        | 0.00       | 41.96      | 0.86       | 0.00       | 0.03       | 0.85        | 0.19     | 0.27      | 0.52       | 0.01       | 0.08         | 1.07       | 73.03        |
| 5276 2AB 5     | Cement         | 932                                            | 26.19       | 0.12        | 0.00       | 40.86      | 0.83       | 0.00       | 0.03       | 0.82        | 0.20     | 0.22      | 0.51       | 0.02       | 0.06         | 1.04       | 70.88        |
| 5276 2AB 6     | Cement         | 1165                                           | 26.73       | 0.14        | 0.00       | 42.01      | 0.75       | 0.00       | 0.05       | 0.79        | 0.19     | 0.16      | 0.49       | 0.01       | 0.07         | 1.08       | 72.46        |
| 5276 2AB 7     | Cement         | 1398                                           | 26.67       | 0.08        | 0.04       | 42.44      | 0.93       | 0.00       | 0.05       | 1.01        | 0.16     | 0.15      | 0.40       | 0.02       | 0.00         | 1.11       | 73.05        |
| 5276 2AB 8     | Enamel         | 1631                                           | 38.40       | 0.10        | 0.00       | 50.47      | 0.38       | 0.00       | 0.04       | 0.82        | 0.12     | 0.47      | 0.11       | 0.03       | 0.07         | 1.41       | 92.41        |
| 5276 2AB 9     | Enamel         | 1864                                           | 39.06       | 0.08        | 0.00       | 50.54      | 0.41       | 0.00       | 0.06       | 0.85        | 0.13     | 0.49      | 0.00       | 0.04       | 0.03         | 1.42       | 93.11        |
| 5276 2AB 10    | Enamel         | 2097                                           | 39.45       | 0.00        | 0.00       | 49.20      | 0.90       | 0.00       | 0.06       | 0.81        | 0.14     | 0.41      | 0.09       | 0.05       | 0.00         | 1.43       | 92.53        |
| 5276 2AB 11    | Enamel         | 2330                                           | 39.30       | 0.04        | 0.00       | 49.36      | 0.96       | 0.00       | 0.03       | 1.03        | 0.09     | 0.38      | 0.09       | 0.06       | 0.00         | 1.47       | 92.80        |
| 5276 2AB 12    | Enamel         | 2563                                           | 38.24       | 0.05        | 0.04       | 50.69      | 0.31       | 0.00       | 0.03       | 0.81        | 0.17     | 0.46      | 0.16       | 0.00       | 0.03         | 1.39       | 92.37        |
| 5276 2AB 13    | Enamel         | 2796                                           | 37.72       | 0.00        | 0.00       | 50.16      | 0.46       | 0.00       | 0.04       | 0.83        | 0.15     | 0.47      | 0.14       | 0.01       | 0.09         | 1.38       | 91.44        |
| 5276 2AB 14    | Enamel         | 3029                                           | 36.83       | 0.00        | 0.04       | 48.85      | 0.43       | 0.00       | 0.04       | 0.85        | 0.13     | 0.45      | 0.11       | 0.02       | 0.02         | 1.35       | 89.12        |
| 5276 2AB 15    | Enamel         | 3262                                           | 37.37       | 0.00        | 0.00       | 50.02      | 0.29       | 0.00       | 0.03       | 0.78        | 0.15     | 0.44      | 0.17       | 0.03       | 0.00         | 1.37       | 90.65        |
| 5276 2AB 16    | Enamel         | 3495                                           | 36.34       | 0.00        | 0.00       | 49.87      | 0.32       | 0.00       | 0.02       | 0.76        | 0.15     | 0.40      | 0.16       | 0.03       | 0.04         | 1.35       | 89.45        |
| 5276 2AB 17    | Enamel         | 3728                                           | 37.27       | 0.05        | 0.00       | 50.40      | 0.33       | 0.00       | 0.03       | 0.79        | 0.14     | 0.39      | 0.10       | 0.02       | 0.00         | 1.39       | 90.92        |
| 5276 2AB 18    | Enamel         | 3961                                           | 37.06       | 0.06        | 0.00       | 50.09      | 0.33       | 0.00       | 0.03       | 0.84        | 0.19     | 0.39      | 0.14       | 0.01       | 0.02         | 1.36       | 90.52        |
| 5276 2AB 19    | Enamel         | 4194                                           | 37.49       | 0.00        | 0.00       | 50.16      | 0.32       | 0.00       | 0.04       | 0.89        | 0.11     | 0.37      | 0.09       | 0.03       | 0.00         | 1.41       | 90.92        |
| 5276 2AB 20    | Enamel         | 4427                                           | 38.47       | 0.05        | 0.00       | 50.93      | 0.37       | 0.00       | 0.05       | 1.00        | 0.16     | 0.35      | 0.07       | 0.03       | 0.03         | 1.43       | 92.92        |
| 5276 2AB 21    | Enamel         | 4660                                           | 38.19       | 0.00        | 0.00       | 50.73      | 0.34       | 0.00       | 0.03       | 1.00        | 0.12     | 0.32      | 0.11       | 0.03       | 0.02         | 1.45       | 92.33        |
| 5276 2AB 22    | Enamel         | 4893                                           | 38.21       | 0.00        | 0.05       | 50.92      | 0.40       | 0.00       | 0.04       | 0.96        | 0.12     | 0.31      | 0.06       | 0.02       | 0.04         | 1.45       | 92.58        |
| 5276 2AB 23    | Enamel         | 5126                                           | 38.34       | 0.00        | 0.00       | 50.69      | 0.38       | 0.00       | 0.05       | 1.08        | 0.08     | 0.28      | 0.05       | 0.03       | 0.03         | 1.48       | 92.50        |
| 5276 2AB 24    | Enamel         | 5359                                           | 38.27       | 0.00        | 0.04       | 50.25      | 0.40       | 0.00       | 0.04       | 1.12        | 0.14     | 0.25      | 0.08       | 0.05       | 0.03         | 1.45       | 92.13        |
| 5276 2AB 25    | Enamel         | 5592                                           | 38.04       | 0.00        | 0.00       | 50.32      | 0.39       | 0.00       | 0.05       | 1.20        | 0.17     | 0.22      | 0.06       | 0.00       | 0.03         | 1.44       | 91.90        |
| 5276 2AB 26    | Enamel         | 5825                                           | 37.06       | 0.07        | 0.00       | 50.26      | 0.40       | 0.00       | 0.07       | 1.23        | 0.16     | 0.20      | 0.04       | 0.02       | 0.05         | 1.43       | 91.00        |
| 5276 2AB 27    | Dentin         | 6058                                           | 33.09       | 0.23        | 0.00       | 45.64      | 2.33       | 0.00       | 0.04       | 0.91        | 0.23     | 0.30      | 0.36       | 0.02       | 0.07         | 1.26       | 84.47        |
| 5276 2AB 28    | Dentin         | 6291                                           | 32.38       | 0.73        | 0.00       | 44.06      | 2.27       | 0.00       | 0.06       | 0.90        | 0.26     | 0.28      | 0.34       | 0.02       | 0.06         | 1.23       | 82.58        |
| 5276 2AB 29    | Dentin         | 6524                                           | 31.03       | 0.39        | 0.00       | 44.45      | 2.50       | 0.00       | 0.04       | 0.92        | 0.19     | 0.31      | 0.36       | 0.02       | 0.03         | 1.22       | 81.46        |
| 5276 2AB 30    | Dentin         | 6757                                           | 30.93       | 0.09        | 0.00       | 44.59      | 2.65       | 0.00       | 0.02       | 0.90        | 0.19     | 0.30      | 0.37       | 0.00       | 0.02         | 1.21       | 81.27        |

**S-276**

| <b>Profile</b> | <b>Mineral</b> | <b>Distance<br/>(<math>\mu\text{m}</math>)</b> | <b>P2O5</b> | <b>SiO2</b> | <b>FeO</b> | <b>CaO</b> | <b>MgO</b> | <b>MnO</b> | <b>SrO</b> | <b>Na2O</b> | <b>F</b> | <b>Cl</b> | <b>SO3</b> | <b>K2O</b> | <b>Al2O3</b> | <b>H2O</b> | <b>Total</b> |
|----------------|----------------|------------------------------------------------|-------------|-------------|------------|------------|------------|------------|------------|-------------|----------|-----------|------------|------------|--------------|------------|--------------|
| 5276 3AB 1     | Cement         | 50                                             | 26.38       | 0.16        | 0.07       | 42.88      | 0.96       | 0.00       | 0.05       | 0.65        | 0.22     | 0.46      | 0.57       | 0.00       | 0.42         | 1.00       | 73.81        |
| 5276 3AB 2     | Cement         | 184                                            | 27.12       | 2.49        | 0.06       | 42.29      | 0.90       | 0.00       | 0.04       | 0.69        | 0.23     | 0.40      | 0.44       | 0.03       | 0.32         | 1.07       | 76.10        |
| 5276 3AB 3     | Cement         | 368                                            | 25.63       | 0.49        | 0.00       | 41.44      | 0.79       | 0.00       | 0.06       | 0.64        | 0.24     | 0.40      | 0.55       | 0.00       | 0.52         | 0.98       | 71.74        |
| 5276 3AB 4     | Cement         | 552                                            | 34.90       | 0.08        | 0.00       | 48.33      | 0.66       | 0.00       | 0.03       | 0.82        | 0.21     | 0.43      | 0.25       | 0.01       | 0.04         | 1.28       | 87.04        |
| 5276 3AB 5     | Enamel         | 736                                            | 38.99       | 0.08        | 0.00       | 51.10      | 0.35       | 0.05       | 0.05       | 0.77        | 0.12     | 0.54      | 0.07       | 0.04       | 0.02         | 1.41       | 93.58        |
| 5276 3AB 6     | Enamel         | 920                                            | 38.11       | 0.07        | 0.00       | 51.59      | 0.36       | 0.05       | 0.04       | 0.81        | 0.10     | 0.49      | 0.07       | 0.05       | 0.02         | 1.42       | 93.18        |
| 5276 3AB 7     | Enamel         | 1104                                           | 38.79       | 0.00        | 0.04       | 50.70      | 0.33       | 0.00       | 0.05       | 0.71        | 0.13     | 0.46      | 0.06       | 0.01       | 0.06         | 1.42       | 92.77        |
| 5276 3AB 8     | Enamel         | 1288                                           | 38.18       | 0.11        | 0.00       | 50.72      | 0.35       | 0.00       | 0.06       | 0.77        | 0.09     | 0.39      | 0.04       | 0.04       | 0.06         | 1.44       | 92.25        |
| 5276 3AB 9     | Enamel         | 1472                                           | 36.89       | 0.04        | 0.00       | 50.48      | 0.32       | 0.00       | 0.04       | 0.83        | 0.17     | 0.39      | 0.00       | 0.03       | 0.24         | 1.37       | 90.78        |
| 5276 3AB 10    | Enamel         | 1656                                           | 36.55       | 0.00        | 0.05       | 50.48      | 0.30       | 0.00       | 0.06       | 0.82        | 0.20     | 0.38      | 0.06       | 0.02       | 0.05         | 1.35       | 90.31        |
| 5276 3AB 11    | Enamel         | 1840                                           | 37.19       | 0.00        | 0.00       | 50.32      | 0.32       | 0.00       | 0.05       | 0.91        | 0.12     | 0.36      | 0.07       | 0.02       | 0.03         | 1.41       | 90.79        |
| 5276 3AB 12    | Enamel         | 2024                                           | 37.13       | 0.00        | 0.00       | 49.97      | 0.37       | 0.00       | 0.04       | 0.90        | 0.14     | 0.31      | 0.06       | 0.00       | 0.03         | 1.40       | 90.36        |
| 5276 3AB 13    | Enamel         | 2208                                           | 38.14       | 0.00        | 0.00       | 50.75      | 0.34       | 0.00       | 0.03       | 0.91        | 0.14     | 0.30      | 0.00       | 0.02       | 0.00         | 1.44       | 92.05        |
| 5276 3AB 14    | Enamel         | 2392                                           | 37.78       | 0.00        | 0.05       | 50.75      | 0.32       | 0.00       | 0.05       | 0.96        | 0.17     | 0.29      | 0.07       | 0.01       | 0.04         | 1.42       | 91.91        |
| 5276 3AB 15    | Enamel         | 2576                                           | 37.31       | 0.10        | 0.00       | 50.74      | 0.32       | 0.00       | 0.05       | 0.97        | 0.16     | 0.30      | 0.09       | 0.03       | 0.15         | 1.41       | 91.63        |
| 5276 3AB 16    | Enamel         | 2760                                           | 38.14       | 0.19        | 0.00       | 50.71      | 0.37       | 0.00       | 0.03       | 1.07        | 0.14     | 0.28      | 0.09       | 0.03       | 0.08         | 1.45       | 92.56        |
| 5276 3AB 17    | Enamel         | 2944                                           | 37.91       | 0.00        | 0.00       | 51.11      | 0.35       | 0.00       | 0.07       | 1.05        | 0.15     | 0.28      | 0.08       | 0.03       | 0.08         | 1.44       | 92.54        |
| 5276 3AB 18    | Enamel         | 3128                                           | 37.69       | 0.13        | 0.00       | 50.29      | 0.32       | 0.00       | 0.06       | 1.02        | 0.12     | 0.25      | 0.12       | 0.03       | 0.05         | 1.45       | 91.51        |
| 5276 3AB 19    | Enamel         | 3312                                           | 38.43       | 0.04        | 0.00       | 50.74      | 0.36       | 0.00       | 0.06       | 1.00        | 0.12     | 0.25      | 0.05       | 0.03       | 0.07         | 1.47       | 92.61        |
| 5276 3AB 20    | Enamel         | 3496                                           | 38.16       | 0.00        | 0.00       | 49.99      | 0.34       | 0.00       | 0.07       | 1.14        | 0.09     | 0.23      | 0.06       | 0.02       | 0.03         | 1.47       | 91.61        |
| 5276 3AB 21    | Enamel         | 3680                                           | 37.89       | 0.06        | 0.00       | 49.56      | 0.36       | 0.00       | 0.08       | 0.98        | 0.14     | 0.26      | 0.12       | 0.05       | 0.07         | 1.43       | 90.98        |
| 5276 3AB 22    | Enamel         | 3864                                           | 37.86       | 0.00        | 0.00       | 49.89      | 0.36       | 0.06       | 0.08       | 1.13        | 0.13     | 0.21      | 0.07       | 0.02       | 0.06         | 1.45       | 91.32        |
| 5276 3AB 23    | Enamel         | 4048                                           | 37.19       | 0.00        | 0.04       | 48.77      | 0.37       | 0.00       | 0.04       | 1.25        | 0.11     | 0.23      | 0.05       | 0.06       | 0.00         | 1.43       | 89.52        |
| 5276 3AB 24    | Enamel         | 4232                                           | 37.63       | 0.00        | 0.00       | 49.30      | 0.41       | 0.00       | 0.08       | 1.20        | 0.15     | 0.20      | 0.08       | 0.05       | 0.00         | 1.44       | 90.54        |
| 5276 3AB 25    | Enamel         | 4416                                           | 37.93       | 0.19        | 0.00       | 49.53      | 0.37       | 0.00       | 0.06       | 1.15        | 0.12     | 0.19      | 0.06       | 0.05       | 0.05         | 1.46       | 91.15        |
| 5276 3AB 26    | Dentin         | 4600                                           | 29.07       | 0.11        | 0.00       | 43.34      | 0.70       | 0.00       | 0.06       | 0.82        | 0.21     | 0.20      | 0.28       | 0.03       | 0.09         | 1.13       | 76.03        |
| 5276 3AB 27    | Dentin         | 4784                                           | 30.54       | 0.00        | 0.05       | 44.80      | 1.97       | 0.00       | 0.07       | 0.92        | 0.16     | 0.23      | 0.36       | 0.03       | 0.06         | 1.22       | 80.42        |
| 5276 3AB 28    | Dentin         | 4968                                           | 28.28       | 0.06        | 0.00       | 39.60      | 1.84       | 0.00       | 0.02       | 0.95        | 0.18     | 0.23      | 0.32       | 0.02       | 0.00         | 1.09       | 72.59        |
| 5276 3AB 29    | Dentin         | 5152                                           | 28.39       | 0.00        | 0.00       | 38.95      | 1.89       | 0.00       | 0.06       | 0.95        | 0.20     | 0.21      | 0.27       | 0.00       | 0.02         | 1.08       | 72.03        |
| 5276 3AB 30    | Dentin         | 5336                                           | 28.69       | 1.40        | 0.00       | 41.50      | 1.95       | 0.00       | 0.04       | 0.96        | 0.21     | 0.23      | 0.31       | 0.01       | 0.06         | 1.15       | 76.50        |

**S-276 2011-01-15**

| Profile     | Mineral | Distance<br>( $\mu\text{m}$ ) | P2O5  | SiO2 | FeO  | CaO   | MgO  | MnO  | SrO  | Na2O | F    | Cl   | SO3  | K2O  | Al2O3 | H2O  | Total |
|-------------|---------|-------------------------------|-------|------|------|-------|------|------|------|------|------|------|------|------|-------|------|-------|
| 5276 4AB 1  | Enamel  | 50                            | 39.13 | 0.00 | 0.00 | 50.51 | 0.28 | 0.00 | 0.06 | 0.65 | 0.15 | 0.68 | 0.08 | 0.02 | 0.00  | 1.36 | 92.91 |
| 5276 4AB 2  | Enamel  | 126                           | 39.35 | 0.00 | 0.00 | 51.18 | 0.28 | 0.00 | 0.00 | 0.70 | 0.16 | 0.67 | 0.10 | 0.00 | 0.04  | 1.37 | 93.83 |
| 5276 4AB 3  | Enamel  | 252                           | 39.81 | 0.00 | 0.00 | 51.49 | 0.30 | 0.00 | 0.00 | 0.74 | 0.14 | 0.62 | 0.09 | 0.00 | 0.00  | 1.41 | 94.59 |
| 5276 4AB 4  | Enamel  | 378                           | 38.97 | 0.00 | 0.05 | 51.78 | 0.23 | 0.00 | 0.04 | 0.70 | 0.14 | 0.59 | 0.06 | 0.03 | 0.03  | 1.40 | 94.01 |
| 5276 4AB 5  | Enamel  | 504                           | 38.84 | 0.00 | 0.04 | 51.82 | 0.26 | 0.00 | 0.06 | 0.84 | 0.13 | 0.56 | 0.06 | 0.00 | 0.02  | 1.41 | 94.05 |
| 5276 4AB 6  | Enamel  | 630                           | 39.21 | 0.00 | 0.00 | 51.56 | 0.21 | 0.05 | 0.07 | 0.87 | 0.13 | 0.53 | 0.00 | 0.00 | 0.02  | 1.42 | 94.08 |
| 5276 4AB 7  | Enamel  | 756                           | 39.11 | 0.00 | 0.00 | 51.70 | 0.25 | 0.00 | 0.05 | 0.87 | 0.14 | 0.49 | 0.06 | 0.02 | 0.00  | 1.43 | 94.10 |
| 5276 4AB 8  | Enamel  | 882                           | 39.03 | 0.00 | 0.06 | 51.38 | 0.26 | 0.00 | 0.05 | 0.93 | 0.16 | 0.48 | 0.00 | 0.02 | 0.04  | 1.41 | 93.81 |
| 5276 4AB 9  | Enamel  | 1008                          | 39.22 | 0.00 | 0.00 | 51.67 | 0.22 | 0.00 | 0.04 | 0.89 | 0.14 | 0.45 | 0.00 | 0.03 | 0.00  | 1.44 | 94.09 |
| 5276 4AB 10 | Enamel  | 1134                          | 39.51 | 0.00 | 0.00 | 51.22 | 0.26 | 0.00 | 0.04 | 0.90 | 0.09 | 0.47 | 0.05 | 0.02 | 0.04  | 1.46 | 94.05 |
| 5276 4AB 11 | Enamel  | 1260                          | 38.76 | 0.00 | 0.00 | 51.23 | 0.27 | 0.00 | 0.04 | 0.96 | 0.13 | 0.43 | 0.00 | 0.01 | 0.00  | 1.43 | 93.26 |
| 5276 4AB 12 | Enamel  | 1386                          | 38.52 | 0.00 | 0.00 | 50.28 | 0.28 | 0.00 | 0.06 | 0.94 | 0.14 | 0.44 | 0.05 | 0.02 | 0.00  | 1.41 | 92.14 |
| 5276 4AB 13 | Enamel  | 1512                          | 38.49 | 0.05 | 0.00 | 50.33 | 0.26 | 0.00 | 0.06 | 1.05 | 0.14 | 0.37 | 0.06 | 0.03 | 0.00  | 1.43 | 92.26 |
| 5276 4AB 14 | Enamel  | 1638                          | 38.43 | 0.06 | 0.00 | 50.79 | 0.29 | 0.00 | 0.04 | 1.00 | 0.14 | 0.39 | 0.09 | 0.04 | 0.08  | 1.43 | 92.77 |
| 5276 4AB 15 | Enamel  | 1764                          | 39.07 | 0.00 | 0.00 | 50.87 | 0.30 | 0.00 | 0.07 | 1.00 | 0.13 | 0.37 | 0.07 | 0.03 | 0.03  | 1.45 | 93.38 |
| 5276 4AB 16 | Enamel  | 1890                          | 39.14 | 0.00 | 0.00 | 50.57 | 0.31 | 0.00 | 0.05 | 1.04 | 0.16 | 0.35 | 0.00 | 0.01 | 0.04  | 1.44 | 93.11 |
| 5276 4AB 17 | Enamel  | 2016                          | 38.71 | 0.00 | 0.00 | 50.09 | 0.29 | 0.00 | 0.00 | 0.96 | 0.15 | 0.36 | 0.06 | 0.04 | 0.02  | 1.43 | 92.11 |
| 5276 4AB 18 | Enamel  | 2142                          | 38.42 | 0.00 | 0.04 | 50.76 | 0.29 | 0.00 | 0.05 | 1.04 | 0.12 | 0.34 | 0.05 | 0.02 | 0.00  | 1.45 | 92.57 |
| 5276 4AB 19 | Enamel  | 2268                          | 38.97 | 0.00 | 0.00 | 50.40 | 0.30 | 0.04 | 0.05 | 1.06 | 0.14 | 0.35 | 0.00 | 0.04 | 0.00  | 1.44 | 92.79 |
| 5276 4AB 20 | Enamel  | 2394                          | 38.45 | 0.00 | 0.00 | 50.13 | 0.31 | 0.00 | 0.07 | 1.03 | 0.11 | 0.33 | 0.07 | 0.02 | 0.00  | 1.45 | 91.95 |
| 5276 4AB 21 | Enamel  | 2520                          | 37.63 | 0.83 | 0.04 | 50.32 | 0.36 | 0.00 | 0.05 | 1.12 | 0.17 | 0.31 | 0.00 | 0.01 | 0.00  | 1.43 | 92.27 |
| 5276 4AB 22 | Enamel  | 2646                          | 38.24 | 0.04 | 0.00 | 50.39 | 0.31 | 0.00 | 0.08 | 1.11 | 0.11 | 0.30 | 0.04 | 0.03 | 0.04  | 1.45 | 92.15 |
| 5276 4AB 23 | Enamel  | 2772                          | 38.41 | 0.05 | 0.00 | 50.08 | 0.36 | 0.00 | 0.04 | 1.18 | 0.10 | 0.28 | 0.00 | 0.03 | 0.03  | 1.46 | 92.02 |
| 5276 4AB 24 | Enamel  | 2898                          | 38.52 | 0.00 | 0.00 | 50.07 | 0.34 | 0.00 | 0.05 | 1.13 | 0.13 | 0.25 | 0.00 | 0.03 | 0.00  | 1.46 | 91.99 |
| 5276 4AB 25 | Enamel  | 3024                          | 37.96 | 0.00 | 0.00 | 49.86 | 0.36 | 0.00 | 0.11 | 1.25 | 0.13 | 0.24 | 0.05 | 0.00 | 0.04  | 1.45 | 91.45 |
| 5276 4AB 26 | Dentin  | 3150                          | 34.20 | 0.07 | 0.00 | 45.30 | 1.55 | 0.00 | 0.07 | 0.92 | 0.17 | 0.19 | 0.32 | 0.03 | 0.00  | 1.32 | 84.14 |
| 5276 4AB 27 | Dentin  | 3276                          | 33.94 | 0.14 | 0.05 | 44.93 | 2.16 | 0.00 | 0.02 | 1.08 | 0.14 | 0.19 | 0.27 | 0.00 | 0.04  | 1.33 | 84.30 |
| 5276 4AB 28 | Dentin  | 3402                          | 34.07 | 0.15 | 0.00 | 44.72 | 2.46 | 0.00 | 0.04 | 1.10 | 0.19 | 0.15 | 0.29 | 0.03 | 0.02  | 1.33 | 84.54 |
| 5276 4AB 29 | Dentin  | 3528                          | 33.71 | 0.14 | 0.00 | 43.99 | 2.54 | 0.00 | 0.07 | 1.19 | 0.22 | 0.15 | 0.29 | 0.02 | 0.04  | 1.30 | 83.65 |
| 5276 4AB 30 | Dentin  | 3654                          | 33.65 | 0.10 | 0.00 | 43.50 | 2.52 | 0.00 | 0.06 | 1.18 | 0.16 | 0.14 | 0.24 | 0.02 | 0.00  | 1.32 | 82.88 |



| <b>S-276</b>   | <i>Hippopotamus amphibius</i> | Molar M3                                       | Zoo         | Collection Inst. Geosciences, University Mainz, Germany |            |            |            |            |            |             |          |           |            |            |              |              |
|----------------|-------------------------------|------------------------------------------------|-------------|---------------------------------------------------------|------------|------------|------------|------------|------------|-------------|----------|-----------|------------|------------|--------------|--------------|
| <b>Profile</b> | <b>Mineral</b>                | <b>Distance<br/>(<math>\mu\text{m}</math>)</b> | <b>P2O5</b> | <b>SiO2</b>                                             | <b>FeO</b> | <b>CaO</b> | <b>MgO</b> | <b>MnO</b> | <b>SrO</b> | <b>Na2O</b> | <b>F</b> | <b>Cl</b> | <b>SO3</b> | <b>K2O</b> | <b>Al2O3</b> | <b>Total</b> |
| 1AB-01         | Enamel                        | 50                                             | 40.09       | 0.14                                                    | 0.00       | 51.58      | 0.28       | 0.04       | 0.03       | 0.59        | 0.00     | 0.67      | 0.07       | 0.01       | 0.01         | 93.52        |
| 1AB-02         | Enamel                        | 126                                            | 39.69       | 0.02                                                    | 0.01       | 51.72      | 0.22       | 0.01       | 0.03       | 0.76        | 0.01     | 0.62      | 0.07       | 0.03       | 0.00         | 93.17        |
| 1AB-03         | Enamel                        | 252                                            | 40.33       | 0.02                                                    | 0.00       | 51.59      | 0.32       | 0.00       | 0.06       | 0.76        | 0.00     | 0.60      | 0.03       | 0.01       | 0.02         | 93.74        |
| 1AB-04         | Enamel                        | 378                                            | 39.73       | 0.19                                                    | 0.01       | 51.68      | 0.21       | 0.01       | 0.04       | 0.78        | 0.00     | 0.57      | 0.05       | 0.00       | 0.02         | 93.27        |
| 1AB-05         | Enamel                        | 504                                            | 39.32       | 0.02                                                    | 0.03       | 51.45      | 0.27       | 0.05       | 0.01       | 0.85        | 0.00     | 0.54      | 0.06       | 0.03       | 0.01         | 92.64        |
| 1AB-06         | Enamel                        | 630                                            | 39.08       | 0.00                                                    | 0.00       | 51.48      | 0.26       | 0.00       | 0.04       | 0.80        | 0.00     | 0.51      | 0.06       | 0.01       | 0.01         | 92.23        |
| 1AB-07         | Enamel                        | 756                                            | 40.08       | 0.00                                                    | 0.00       | 51.86      | 0.25       | 0.00       | 0.05       | 0.81        | 0.00     | 0.49      | 0.03       | 0.03       | 0.00         | 93.59        |
| 1AB-08         | Enamel                        | 882                                            | 40.04       | 0.00                                                    | 0.04       | 51.37      | 0.21       | 0.06       | 0.06       | 0.82        | 0.03     | 0.48      | 0.07       | 0.00       | 0.02         | 93.19        |
| 1AB-09         | Enamel                        | 1008                                           | 38.69       | 0.01                                                    | 0.00       | 51.04      | 0.24       | 0.00       | 0.03       | 0.91        | 0.04     | 0.45      | 0.09       | 0.01       | 0.01         | 91.52        |
| 1AB-10         | Enamel                        | 1134                                           | 39.42       | 0.01                                                    | 0.03       | 51.08      | 0.21       | 0.00       | 0.05       | 0.87        | 0.00     | 0.44      | 0.03       | 0.02       | 0.01         | 92.17        |
| 1AB-11         | Enamel                        | 1260                                           | 39.39       | 0.00                                                    | 0.03       | 51.11      | 0.28       | 0.04       | 0.05       | 0.90        | 0.00     | 0.40      | 0.08       | 0.01       | 0.04         | 92.32        |
| 1AB-12         | Enamel                        | 1386                                           | 39.09       | 0.21                                                    | 0.00       | 51.13      | 0.27       | 0.00       | 0.09       | 0.94        | 0.02     | 0.40      | 0.08       | 0.00       | 0.01         | 92.24        |
| 1AB-13         | Enamel                        | 1512                                           | 39.71       | 0.00                                                    | 0.08       | 50.89      | 0.28       | 0.00       | 0.06       | 1.01        | 0.03     | 0.37      | 0.03       | 0.03       | 0.01         | 92.48        |
| 1AB-14         | Enamel                        | 1638                                           | 38.65       | 0.05                                                    | 0.03       | 50.74      | 0.29       | 0.00       | 0.09       | 1.08        | 0.00     | 0.35      | 0.06       | 0.04       | 0.01         | 91.39        |
| 1AB-15         | Enamel                        | 1764                                           | 39.26       | 0.03                                                    | 0.01       | 50.81      | 0.24       | 0.00       | 0.07       | 0.95        | 0.02     | 0.36      | 0.04       | 0.01       | 0.02         | 91.79        |
| 1AB-16         | Enamel                        | 1890                                           | 40.11       | 0.02                                                    | 0.00       | 50.87      | 0.29       | 0.00       | 0.06       | 1.02        | 0.01     | 0.35      | 0.02       | 0.03       | 0.01         | 92.78        |
| 1AB-17         | Enamel                        | 2016                                           | 39.90       | 0.04                                                    | 0.02       | 50.66      | 0.28       | 0.00       | 0.04       | 1.02        | 0.04     | 0.35      | 0.05       | 0.02       | 0.02         | 92.43        |
| 1AB-18         | Enamel                        | 2142                                           | 39.51       | 0.16                                                    | 0.00       | 50.85      | 0.26       | 0.04       | 0.07       | 0.96        | 0.05     | 0.34      | 0.04       | 0.02       | 0.02         | 92.32        |
| 1AB-19         | Enamel                        | 2268                                           | 38.85       | 0.00                                                    | 0.03       | 50.98      | 0.29       | 0.00       | 0.02       | 1.02        | 0.00     | 0.33      | 0.03       | 0.00       | 0.02         | 91.58        |
| 1AB-20         | Enamel                        | 2394                                           | 39.27       | 0.00                                                    | 0.00       | 50.68      | 0.30       | 0.00       | 0.03       | 1.01        | 0.02     | 0.32      | 0.06       | 0.03       | 0.00         | 91.71        |
| 1AB-21         | Enamel                        | 2520                                           | 39.79       | 0.20                                                    | 0.01       | 50.79      | 0.30       | 0.00       | 0.05       | 0.98        | 0.00     | 0.30      | 0.07       | 0.04       | 0.03         | 92.55        |
| 1AB-22         | Enamel                        | 2646                                           | 39.14       | 0.03                                                    | 0.06       | 50.55      | 0.31       | 0.04       | 0.04       | 1.12        | 0.00     | 0.30      | 0.05       | 0.02       | 0.01         | 91.65        |
| 1AB-23         | Enamel                        | 2772                                           | 38.94       | 0.09                                                    | 0.01       | 50.11      | 0.32       | 0.02       | 0.06       | 1.12        | 0.00     | 0.26      | 0.03       | 0.03       | 0.04         | 91.02        |
| 1AB-24         | Enamel                        | 2898                                           | 38.79       | 0.14                                                    | 0.06       | 50.17      | 0.33       | 0.00       | 0.04       | 1.15        | 0.02     | 0.23      | 0.03       | 0.04       | 0.01         | 90.99        |
| 1AB-25         | Dentin                        | 3024                                           | 34.14       | 0.05                                                    | 0.09       | 40.33      | 0.90       | 0.00       | 0.04       | 0.75        | 0.00     | 0.20      | 0.32       | 0.02       | 0.02         | 76.85        |
| 1AB-26         | Dentin                        | 3150                                           | 35.32       | 0.04                                                    | 0.04       | 39.29      | 1.59       | 0.00       | 0.02       | 0.79        | 0.02     | 0.19      | 0.32       | 0.01       | 0.02         | 77.64        |
| 1AB-27         | Dentin                        | 3276                                           | 34.05       | 0.00                                                    | 0.04       | 36.89      | 2.05       | 0.00       | 0.07       | 0.85        | 0.06     | 0.15      | 0.35       | 0.01       | 0.02         | 74.53        |
| 1AB-28         | Dentin                        | 3402                                           | 34.02       | 0.06                                                    | 0.03       | 35.79      | 2.11       | 0.03       | 0.06       | 0.81        | 0.07     | 0.14      | 0.41       | 0.03       | 0.06         | 73.62        |
| 1AB-29         | Dentin                        | 3528                                           | 34.09       | 0.03                                                    | 0.00       | 36.62      | 2.36       | 0.00       | 0.06       | 0.83        | 0.00     | 0.12      | 0.42       | 0.01       | 0.05         | 74.58        |
| 1AB-30         | Dentin                        | 3654                                           | 33.55       | 0.03                                                    | 0.00       | 35.48      | 2.34       | 0.00       | 0.09       | 0.90        | 0.06     | 0.09      | 0.41       | 0.03       | 0.04         | 73.00        |

| <b>S-276</b>   | <i>Hippopotamus amphibius</i> | Molar M3                                       | Zoo         | Collection  | Inst. Geosciences, University Mainz, Germany |            |            |            |            |             |          |           |            |            |              |              |
|----------------|-------------------------------|------------------------------------------------|-------------|-------------|----------------------------------------------|------------|------------|------------|------------|-------------|----------|-----------|------------|------------|--------------|--------------|
| <b>Profile</b> | <b>Mineral</b>                | <b>Distance<br/>(<math>\mu\text{m}</math>)</b> | <b>P2O5</b> | <b>SiO2</b> | <b>FeO</b>                                   | <b>CaO</b> | <b>MgO</b> | <b>MnO</b> | <b>SrO</b> | <b>Na2O</b> | <b>F</b> | <b>Cl</b> | <b>SO3</b> | <b>K2O</b> | <b>Al2O3</b> | <b>Total</b> |
| 2AB-01         | Cement                        | 50                                             | 29.63       | 0.15        | 0.10                                         | 34.22      | 0.87       | 0.03       | 0.11       | 0.60        | 0.16     | 0.09      | 1.02       | 0.01       | 0.06         | 67.05        |
| 2AB-02         | Cement                        | 233                                            | 30.86       | 0.11        | 0.00                                         | 36.47      | 0.91       | 0.00       | 0.06       | 0.64        | 0.10     | 0.11      | 0.52       | 0.01       | 0.06         | 69.84        |
| 2AB-03         | Cement                        | 466                                            | 29.91       | 0.50        | 0.08                                         | 36.31      | 0.81       | 0.02       | 0.07       | 0.65        | 0.04     | 0.07      | 0.49       | 0.05       | 0.34         | 69.36        |
| 2AB-04         | Cement                        | 699                                            | 29.99       | 0.17        | 0.05                                         | 36.41      | 0.68       | 0.00       | 0.01       | 0.81        | 0.06     | 0.11      | 0.49       | 0.00       | 0.06         | 68.84        |
| 2AB-05         | Cement                        | 932                                            | 29.85       | 0.26        | 0.03                                         | 36.86      | 0.76       | 0.02       | 0.09       | 0.79        | 0.07     | 0.12      | 0.50       | 0.01       | 0.17         | 69.53        |
| 2AB-06         | Cement                        | 1165                                           | 27.92       | 0.12        | 0.01                                         | 34.79      | 0.66       | 0.06       | 0.05       | 0.60        | 0.03     | 0.08      | 0.59       | 0.02       | 0.14         | 65.07        |
| 2AB-07         | Cement                        | 1398                                           | 29.81       | 0.05        | 0.04                                         | 36.27      | 0.77       | 0.03       | 0.03       | 1.05        | 0.05     | 0.10      | 0.41       | 0.03       | 0.00         | 68.62        |
| 2AB-08         | Cement                        | 1631                                           | 29.88       | 0.00        | 0.08                                         | 35.83      | 0.96       | 0.00       | 0.04       | 0.90        | 0.02     | 0.11      | 0.39       | 0.02       | 0.01         | 68.24        |
| 2AB-09         | Cement                        | 1864                                           | 31.25       | 0.03        | 0.00                                         | 36.22      | 0.87       | 0.02       | 0.08       | 0.71        | 0.07     | 0.08      | 0.47       | 0.02       | 0.06         | 69.87        |
| 2AB-10         | Enamel                        | 2097                                           | 39.40       | 0.63        | 0.00                                         | 50.27      | 0.41       | 0.01       | 0.06       | 0.87        | 0.00     | 0.43      | 0.07       | 0.02       | 0.01         | 92.19        |
| 2AB-11         | Enamel                        | 2330                                           | 39.62       | 0.01        | 0.00                                         | 49.52      | 0.80       | 0.00       | 0.04       | 0.90        | 0.05     | 0.42      | 0.09       | 0.01       | 0.02         | 91.47        |
| 2AB-12         | Enamel                        | 2563                                           | 40.09       | 0.04        | 0.01                                         | 50.16      | 0.78       | 0.07       | 0.09       | 0.87        | 0.00     | 0.42      | 0.12       | 0.01       | 0.00         | 92.67        |
| 2AB-13         | Enamel                        | 2796                                           | 36.76       | 0.01        | 0.03                                         | 46.62      | 0.50       | 0.05       | 0.03       | 0.80        | 0.03     | 0.49      | 0.14       | 0.02       | 0.01         | 85.47        |
| 2AB-14         | Enamel                        | 3029                                           | 39.68       | 0.01        | 0.03                                         | 50.33      | 0.62       | 0.06       | 0.04       | 0.78        | 0.01     | 0.42      | 0.12       | 0.02       | 0.04         | 92.16        |
| 2AB-15         | Enamel                        | 3262                                           | 38.33       | 0.03        | 0.03                                         | 50.67      | 0.35       | 0.00       | 0.06       | 0.85        | 0.00     | 0.45      | 0.16       | 0.01       | 0.04         | 90.98        |
| 2AB-16         | Enamel                        | 3495                                           | 36.84       | 0.06        | 0.03                                         | 48.67      | 0.24       | 0.05       | 0.06       | 0.78        | 0.03     | 0.42      | 0.20       | 0.02       | 0.03         | 87.42        |
| 2AB-17         | Enamel                        | 3728                                           | 37.80       | 0.05        | 0.04                                         | 49.14      | 0.25       | 0.00       | 0.07       | 0.85        | 0.00     | 0.41      | 0.17       | 0.01       | 0.01         | 88.80        |
| 2AB-18         | Enamel                        | 3961                                           | 38.27       | 0.04        | 0.00                                         | 49.26      | 0.25       | 0.03       | 0.07       | 0.80        | 0.00     | 0.41      | 0.12       | 0.02       | 0.03         | 89.29        |
| 2AB-19         | Enamel                        | 4194                                           | 38.23       | 0.05        | 0.01                                         | 49.53      | 0.27       | 0.02       | 0.05       | 0.88        | 0.00     | 0.39      | 0.10       | 0.02       | 0.01         | 89.56        |
| 2AB-20         | Enamel                        | 4427                                           | 38.25       | 0.01        | 0.08                                         | 49.75      | 0.30       | 0.00       | 0.01       | 0.89        | 0.00     | 0.38      | 0.09       | 0.04       | 0.00         | 89.78        |
| 2AB-21         | Enamel                        | 4660                                           | 38.00       | 0.03        | 0.01                                         | 50.32      | 0.31       | 0.00       | 0.04       | 0.94        | 0.00     | 0.34      | 0.08       | 0.01       | 0.02         | 90.11        |
| 2AB-22         | Enamel                        | 4893                                           | 39.05       | 0.00        | 0.00                                         | 50.55      | 0.33       | 0.00       | 0.06       | 0.99        | 0.03     | 0.32      | 0.08       | 0.03       | 0.04         | 91.48        |
| 2AB-23         | Enamel                        | 5126                                           | 38.68       | 0.24        | 0.06                                         | 47.57      | 0.34       | 0.00       | 0.03       | 1.05        | 0.00     | 0.30      | 0.04       | 0.03       | 0.00         | 88.34        |
| 2AB-24         | Enamel                        | 5359                                           | 39.03       | 0.00        | 0.01                                         | 50.20      | 0.36       | 0.00       | 0.02       | 1.04        | 0.04     | 0.30      | 0.06       | 0.02       | 0.01         | 91.10        |
| 2AB-25         | Enamel                        | 5592                                           | 38.75       | 0.03        | 0.00                                         | 50.16      | 0.34       | 0.02       | 0.04       | 1.02        | 0.00     | 0.26      | 0.07       | 0.03       | 0.04         | 90.75        |
| 2AB-26         | dentin                        | 5825                                           | 37.99       | 0.10        | 0.00                                         | 49.81      | 0.40       | 0.01       | 0.10       | 1.23        | 0.00     | 0.22      | 0.06       | 0.01       | 0.06         | 89.98        |
| 2AB-27         | dentin                        | 6058                                           | 33.60       | 0.00        | 0.06                                         | 40.06      | 0.72       | 0.00       | 0.06       | 0.80        | 0.05     | 0.20      | 0.31       | 0.02       | 0.02         | 75.88        |
| 2AB-28         | dentin                        | 6291                                           | 34.55       | 0.00        | 0.00                                         | 37.61      | 2.33       | 0.04       | 0.09       | 0.83        | 0.05     | 0.20      | 0.37       | 0.03       | 0.03         | 76.14        |
| 2AB-29         | dentin                        | 6524                                           | 34.28       | 0.01        | 0.00                                         | 37.53      | 2.46       | 0.01       | 0.04       | 0.98        | 0.03     | 0.21      | 0.42       | 0.00       | 0.02         | 75.99        |
| 2AB-30         | dentin                        | 6757                                           | 34.07       | 0.04        | 0.00                                         | 37.32      | 2.45       | 0.00       | 0.05       | 0.92        | 0.04     | 0.21      | 0.36       | 0.02       | 0.01         | 75.48        |

| S-276   | <i>Hippopotamus amphibius</i> | Molar M3                      | Zoo   | Collection | Inst. Geosciences, University Mainz, Germany |       |      |      |      |      |      |      |      |      |       |       |
|---------|-------------------------------|-------------------------------|-------|------------|----------------------------------------------|-------|------|------|------|------|------|------|------|------|-------|-------|
| Profile | Mineral                       | Distance<br>( $\mu\text{m}$ ) | P2O5  | SiO2       | FeO                                          | CaO   | MgO  | MnO  | SrO  | Na2O | F    | Cl   | SO3  | K2O  | Al2O3 | Total |
| 3AB-01  | Cement                        | 50                            | 31.01 | 0.47       | 0.07                                         | 36.34 | 0.90 | 0.00 | 0.07 | 0.64 | 0.06 | 0.11 | 0.65 | 0.00 | 0.31  | 70.62 |
| 3AB-02  | Cement                        | 184                           | 29.18 | 0.52       | 0.01                                         | 35.18 | 0.91 | 0.02 | 0.05 | 0.63 | 0.05 | 0.29 | 0.48 | 0.01 | 0.21  | 67.52 |
| 3AB-03  | Cement                        | 368                           | 29.33 | 0.58       | 0.03                                         | 36.94 | 0.83 | 0.00 | 0.03 | 0.77 | 0.10 | 0.18 | 0.57 | 0.00 | 0.21  | 69.55 |
| 3AB-04  | Cement                        | 552                           | 30.13 | 0.96       | 0.00                                         | 37.01 | 0.84 | 0.00 | 0.02 | 0.68 | 0.02 | 0.19 | 0.48 | 0.02 | 0.35  | 70.70 |
| 3AB-05  | Cement                        | 736                           | 29.89 | 0.25       | 0.03                                         | 37.32 | 0.79 | 0.01 | 0.10 | 0.63 | 0.07 | 0.19 | 0.52 | 0.01 | 0.28  | 70.07 |
| 3AB-06  | Cement                        | 920                           | 30.78 | 0.19       | 0.00                                         | 37.40 | 0.73 | 0.00 | 0.05 | 0.70 | 0.12 | 0.15 | 0.52 | 0.02 | 0.20  | 70.84 |
| 3AB-07  | Cement                        | 1104                          | 30.21 | 1.08       | 0.00                                         | 36.63 | 0.86 | 0.00 | 0.03 | 0.71 | 0.12 | 0.14 | 0.47 | 0.03 | 0.25  | 70.53 |
| 3AB-08  | Enamel                        | 1288                          | 39.72 | 0.05       | 0.01                                         | 50.65 | 0.37 | 0.03 | 0.02 | 0.84 | 0.00 | 0.51 | 0.03 | 0.03 | 0.04  | 92.30 |
| 3AB-09  | Enamel                        | 1472                          | 39.61 | 0.04       | 0.03                                         | 50.71 | 0.31 | 0.03 | 0.00 | 0.85 | 0.00 | 0.48 | 0.08 | 0.02 | 0.05  | 92.21 |
| 3AB-10  | Enamel                        | 1656                          | 38.82 | 0.07       | 0.03                                         | 50.56 | 0.33 | 0.03 | 0.01 | 0.78 | 0.00 | 0.43 | 0.07 | 0.00 | 0.41  | 91.52 |
| 3AB-11  | Enamel                        | 1840                          | 39.87 | 0.04       | 0.00                                         | 50.49 | 0.35 | 0.03 | 0.02 | 0.92 | 0.02 | 0.41 | 0.01 | 0.03 | 0.01  | 92.20 |
| 3AB-12  | Enamel                        | 2024                          | 38.42 | 0.06       | 0.06                                         | 49.55 | 0.30 | 0.06 | 0.06 | 0.82 | 0.03 | 0.37 | 0.09 | 0.02 | 0.08  | 89.91 |
| 3AB-13  | Enamel                        | 2208                          | 38.09 | 0.04       | 0.06                                         | 49.17 | 0.33 | 0.06 | 0.08 | 0.87 | 0.03 | 0.34 | 0.11 | 0.02 | 0.02  | 89.21 |
| 3AB-14  | Enamel                        | 2392                          | 38.06 | 0.04       | 0.00                                         | 49.81 | 0.32 | 0.01 | 0.04 | 0.87 | 0.00 | 0.34 | 0.07 | 0.03 | 0.06  | 89.64 |
| 3AB-15  | Enamel                        | 2576                          | 38.23 | 0.15       | 0.06                                         | 49.32 | 0.31 | 0.00 | 0.07 | 0.91 | 0.00 | 0.33 | 0.09 | 0.02 | 0.03  | 89.49 |
| 3AB-16  | Enamel                        | 2760                          | 38.09 | 0.01       | 0.08                                         | 49.52 | 0.32 | 0.00 | 0.04 | 1.02 | 0.00 | 0.31 | 0.03 | 0.04 | 0.02  | 89.46 |
| 3AB-17  | Enamel                        | 2944                          | 38.77 | 0.04       | 0.00                                         | 50.22 | 0.31 | 0.00 | 0.05 | 0.93 | 0.00 | 0.29 | 0.08 | 0.02 | 0.05  | 90.75 |
| 3AB-18  | Enamel                        | 3128                          | 38.66 | 0.06       | 0.05                                         | 50.27 | 0.34 | 0.02 | 0.08 | 1.05 | 0.00 | 0.29 | 0.10 | 0.03 | 0.06  | 90.99 |
| 3AB-19  | Enamel                        | 3312                          | 39.18 | 0.09       | 0.00                                         | 50.13 | 0.33 | 0.03 | 0.04 | 0.93 | 0.02 | 0.27 | 0.10 | 0.02 | 0.09  | 91.22 |
| 3AB-20  | Enamel                        | 3496                          | 39.21 | 0.07       | 0.00                                         | 49.95 | 0.32 | 0.03 | 0.06 | 1.05 | 0.00 | 0.24 | 0.04 | 0.03 | 0.06  | 91.07 |
| 3AB-21  | Enamel                        | 3680                          | 37.98 | 0.07       | 0.02                                         | 49.15 | 0.32 | 0.04 | 0.06 | 1.03 | 0.00 | 0.25 | 0.08 | 0.02 | 0.05  | 89.05 |
| 3AB-22  | Enamel                        | 3864                          | 38.34 | 0.00       | 0.01                                         | 49.92 | 0.35 | 0.00 | 0.04 | 1.13 | 0.00 | 0.24 | 0.07 | 0.04 | 0.07  | 90.21 |
| 3AB-23  | Enamel                        | 4048                          | 37.67 | 0.02       | 0.01                                         | 50.12 | 0.31 | 0.00 | 0.03 | 1.11 | 0.00 | 0.22 | 0.08 | 0.01 | 0.35  | 89.94 |
| 3AB-24  | Enamel                        | 4232                          | 39.16 | 0.02       | 0.10                                         | 50.63 | 0.31 | 0.03 | 0.06 | 1.04 | 0.02 | 0.23 | 0.07 | 0.04 | 0.06  | 91.74 |
| 3AB-25  | Enamel                        | 4416                          | 38.95 | 0.09       | 0.00                                         | 49.94 | 0.27 | 0.00 | 0.06 | 1.00 | 0.00 | 0.20 | 0.07 | 0.04 | 0.06  | 90.69 |
| 3AB-26  | Enamel                        | 4600                          | 38.34 | 0.01       | 0.07                                         | 50.09 | 0.37 | 0.00 | 0.07 | 1.25 | 0.02 | 0.20 | 0.08 | 0.03 | 0.06  | 90.59 |
| 3AB-27  | Enamel                        | 4784                          | 38.97 | 0.39       | 0.00                                         | 49.28 | 0.35 | 0.01 | 0.08 | 1.16 | 0.02 | 0.19 | 0.05 | 0.01 | 0.02  | 90.53 |
| 3AB-28  | Enamel                        | 4968                          | 33.05 | 0.26       | 0.04                                         | 39.84 | 0.61 | 0.00 | 0.06 | 0.75 | 0.04 | 0.11 | 0.31 | 0.02 | 0.20  | 75.30 |
| 3AB-29  | dentin                        | 5152                          | 33.95 | 0.04       | 0.00                                         | 37.24 | 1.66 | 0.00 | 0.06 | 0.87 | 0.03 | 0.15 | 0.34 | 0.01 | 0.03  | 74.38 |
| 3AB-30  | dentin                        | 5336                          | 33.85 | 0.05       | 0.00                                         | 37.63 | 2.02 | 0.00 | 0.05 | 0.91 | 0.01 | 0.17 | 0.33 | 0.02 | 0.00  | 75.04 |

| <b>Alb10</b>   | <i>Hippopotamus amphibius</i> |                          | Premolar    |             | Lake Albert, Sebugoro Beach |            |            |            |            |             |          |           |            |            |              |            |              |
|----------------|-------------------------------|--------------------------|-------------|-------------|-----------------------------|------------|------------|------------|------------|-------------|----------|-----------|------------|------------|--------------|------------|--------------|
| <b>Comment</b> | <b>Mineral</b>                | <b>Distance<br/>(µm)</b> | <b>P2O5</b> | <b>SiO2</b> | <b>FeO</b>                  | <b>CaO</b> | <b>MgO</b> | <b>MnO</b> | <b>SrO</b> | <b>Na2O</b> | <b>F</b> | <b>Cl</b> | <b>SO3</b> | <b>K2O</b> | <b>Al2O3</b> | <b>H2O</b> | <b>Total</b> |
| Alb10 1AB-01   | Enamel                        | 50                       | 40.70       | 0.00        | 0.00                        | 49.08      | 0.35       | 0.00       | 0.07       | 0.76        | 0.15     | 0.49      | 0.07       | 0.03       | 0.00         | 1.44       | 93.13        |
| Alb10 1AB-02   | Enamel                        | 114                      | 39.83       | 0.00        | 0.06                        | 50.28      | 0.36       | 0.00       | 0.04       | 0.75        | 0.15     | 0.49      | 0.00       | 0.00       | 0.00         | 1.44       | 93.40        |
| Alb10 1AB-03   | Enamel                        | 178                      | 40.17       | 0.00        | 0.05                        | 50.02      | 0.35       | 0.00       | 0.07       | 0.78        | 0.18     | 0.49      | 0.05       | 0.03       | 0.00         | 1.43       | 93.62        |
| Alb10 1AB-04   | Enamel                        | 242                      | 39.97       | 0.00        | 0.00                        | 50.50      | 0.39       | 0.00       | 0.06       | 0.78        | 0.18     | 0.45      | 0.00       | 0.00       | 0.00         | 1.44       | 93.77        |
| Alb10 1AB-05   | Enamel                        | 306                      | 39.50       | 0.00        | 0.00                        | 51.87      | 0.33       | 0.00       | 0.04       | 0.84        | 0.16     | 0.43      | 0.00       | 0.02       | 0.00         | 1.46       | 94.64        |
| Alb10 1AB-06   | Enamel                        | 370                      | 39.49       | 0.00        | 0.00                        | 51.30      | 0.39       | 0.00       | 0.08       | 0.85        | 0.16     | 0.43      | 0.00       | 0.00       | 0.00         | 1.45       | 94.16        |
| Alb10 1AB-07   | Enamel                        | 434                      | 39.99       | 0.00        | 0.00                        | 50.54      | 0.38       | 0.00       | 0.09       | 0.82        | 0.16     | 0.42      | 0.00       | 0.03       | 0.00         | 1.45       | 93.89        |
| Alb10 1AB-08   | Enamel                        | 498                      | 39.56       | 0.00        | 0.00                        | 50.98      | 0.37       | 0.00       | 0.07       | 0.90        | 0.15     | 0.40      | 0.00       | 0.03       | 0.00         | 1.46       | 93.91        |
| Alb10 1AB-09   | Enamel                        | 562                      | 39.36       | 0.00        | 0.00                        | 51.01      | 0.40       | 0.00       | 0.07       | 0.84        | 0.19     | 0.42      | 0.00       | 0.03       | 0.00         | 1.43       | 93.75        |
| Alb10 1AB-10   | Enamel                        | 626                      | 39.89       | 0.00        | 0.00                        | 51.08      | 0.39       | 0.00       | 0.04       | 0.85        | 0.15     | 0.41      | 0.00       | 0.02       | 0.00         | 1.47       | 94.30        |
| Alb10 1AB-11   | Enamel                        | 690                      | 39.52       | 0.00        | 0.00                        | 50.58      | 0.36       | 0.00       | 0.06       | 0.85        | 0.16     | 0.38      | 0.00       | 0.03       | 0.00         | 1.45       | 93.39        |
| Alb10 1AB-12   | Enamel                        | 754                      | 39.84       | 0.00        | 0.00                        | 49.81      | 0.38       | 0.00       | 0.08       | 0.90        | 0.13     | 0.37      | 0.00       | 0.02       | 0.00         | 1.47       | 92.99        |
| Alb10 1AB-13   | Enamel                        | 818                      | 39.34       | 0.00        | 0.09                        | 50.89      | 0.41       | 0.00       | 0.05       | 0.87        | 0.18     | 0.37      | 0.00       | 0.03       | 0.00         | 1.45       | 93.66        |
| Alb10 1AB-14   | Enamel                        | 882                      | 39.92       | 0.00        | 0.03                        | 51.49      | 0.45       | 0.00       | 0.09       | 0.93        | 0.15     | 0.34      | 0.00       | 0.03       | 0.00         | 1.49       | 94.91        |
| Alb10 1AB-15   | Enamel                        | 946                      | 39.61       | 0.00        | 0.00                        | 50.59      | 0.43       | 0.00       | 0.06       | 0.89        | 0.13     | 0.33      | 0.00       | 0.00       | 0.00         | 1.48       | 93.52        |
| Alb10 1AB-16   | Enamel                        | 1010                     | 39.53       | 0.00        | 0.00                        | 49.94      | 0.45       | 0.00       | 0.05       | 0.93        | 0.17     | 0.31      | 0.00       | 0.04       | 0.00         | 1.46       | 92.88        |
| Alb10 1AB-17   | Enamel                        | 1074                     | 39.72       | 0.00        | 0.04                        | 50.19      | 0.50       | 0.00       | 0.07       | 0.98        | 0.15     | 0.28      | 0.00       | 0.03       | 0.00         | 1.49       | 93.43        |
| Alb10 1AB-18   | Enamel                        | 1138                     | 40.08       | 0.00        | 0.00                        | 50.63      | 0.48       | 0.00       | 0.05       | 1.00        | 0.14     | 0.28      | 0.00       | 0.04       | 0.00         | 1.50       | 94.20        |
| Alb10 1AB-19   | Enamel                        | 1202                     | 39.54       | 0.00        | 0.05                        | 50.28      | 0.50       | 0.00       | 0.06       | 0.91        | 0.13     | 0.30      | 0.00       | 0.02       | 0.00         | 1.49       | 93.27        |
| Alb10 1AB-20   | Enamel                        | 1266                     | 39.25       | 0.00        | 0.00                        | 49.31      | 0.52       | 0.00       | 0.09       | 1.08        | 0.11     | 0.25      | 0.00       | 0.00       | 0.00         | 1.49       | 92.09        |
| Alb10 1AB-21   | Enamel                        | 1330                     | 39.76       | 0.00        | 0.00                        | 49.46      | 0.50       | 0.00       | 0.06       | 1.08        | 0.14     | 0.22      | 0.05       | 0.02       | 0.00         | 1.50       | 92.78        |
| Alb10 1AB-22   | Enamel                        | 1394                     | 39.75       | 0.00        | 0.09                        | 49.19      | 0.57       | 0.00       | 0.07       | 1.17        | 0.11     | 0.20      | 0.00       | 0.03       | 0.00         | 1.51       | 92.69        |
| Alb10 1AB-23   | Enamel                        | 1458                     | 39.31       | 0.00        | 0.05                        | 49.08      | 0.58       | 0.00       | 0.08       | 1.22        | 0.10     | 0.21      | 0.00       | 0.04       | 0.00         | 1.50       | 92.17        |
| Alb10 1AB-24   | Enamel                        | 1522                     | 39.32       | 0.00        | 0.00                        | 48.82      | 0.51       | 0.00       | 0.07       | 1.21        | 0.13     | 0.20      | 0.00       | 0.03       | 0.00         | 1.49       | 91.78        |
| Alb10 1AB-25   | Enamel                        | 1586                     | 39.61       | 0.00        | 0.00                        | 47.96      | 0.55       | 0.00       | 0.07       | 1.33        | 0.16     | 0.19      | 0.00       | 0.06       | 0.00         | 1.48       | 91.40        |
| Alb10 1AB-26   | Enamel                        | 1650                     | 39.36       | 0.00        | 0.00                        | 47.95      | 0.56       | 0.00       | 0.07       | 1.22        | 0.14     | 0.17      | 0.00       | 0.07       | 0.00         | 1.48       | 91.02        |
| Alb10 1AB-27   | Dentin                        | 1714                     | 29.93       | 0.00        | 0.00                        | 38.03      | 2.02       | 0.00       | 0.06       | 0.71        | 0.21     | 0.06      | 0.26       | 0.03       | 0.00         | 1.17       | 72.48        |
| Alb10 1AB-28   | Dentin                        | 1778                     | 28.76       | 0.00        | 0.00                        | 36.08      | 2.14       | 0.00       | 0.07       | 0.70        | 0.24     | 0.04      | 0.21       | 0.00       | 0.00         | 1.12       | 69.35        |
| Alb10 1AB-29   | Dentin                        | 1842                     | 29.16       | 0.00        | 0.00                        | 35.42      | 2.08       | 0.00       | 0.09       | 0.80        | 0.21     | 0.05      | 0.19       | 0.03       | 0.00         | 1.13       | 69.15        |
| Alb10 1AB-30   | Dentin                        | 1906                     | 29.02       | 0.00        | 0.00                        | 37.41      | 2.28       | 0.00       | 0.06       | 0.79        | 0.24     | 0.03      | 0.20       | 0.02       | 0.00         | 1.14       | 71.20        |

| <b>Alb10</b>   | <i>Hippopotamus amphibius</i> | Premolar                 | Lake Albert, Sebugoro Beach |             |            |            |            |            |            |             |          |           |            |            |              |            |              |
|----------------|-------------------------------|--------------------------|-----------------------------|-------------|------------|------------|------------|------------|------------|-------------|----------|-----------|------------|------------|--------------|------------|--------------|
| <b>Comment</b> | <b>Mineral</b>                | <b>Distance<br/>(µm)</b> | <b>P2O5</b>                 | <b>SiO2</b> | <b>FeO</b> | <b>CaO</b> | <b>MgO</b> | <b>MnO</b> | <b>SrO</b> | <b>Na2O</b> | <b>F</b> | <b>Cl</b> | <b>SO3</b> | <b>K2O</b> | <b>Al2O3</b> | <b>H2O</b> | <b>Total</b> |
| Alb10 5AB-01   | Enamel                        | 50                       | 40.95                       | 0.00        | 0.00       | 49.34      | 0.24       | 0.00       | 0.06       | 0.61        | 0.16     | 0.65      | 0.08       | 0.00       | 0.00         | 1.41       | 93.48        |
| Alb10 5AB-02   | Enamel                        | 100                      | 40.54                       | 0.00        | 0.00       | 49.67      | 0.25       | 0.00       | 0.04       | 0.74        | 0.17     | 0.58      | 0.06       | 0.03       | 0.00         | 1.42       | 93.49        |
| Alb10 5AB-03   | Enamel                        | 150                      | 40.46                       | 0.00        | 0.00       | 49.04      | 0.30       | 0.00       | 0.06       | 0.68        | 0.16     | 0.54      | 0.05       | 0.03       | 0.00         | 1.42       | 92.75        |
| Alb10 5AB-04   | Enamel                        | 200                      | 40.29                       | 0.00        | 0.00       | 50.08      | 0.27       | 0.00       | 0.06       | 0.79        | 0.17     | 0.51      | 0.00       | 0.02       | 0.03         | 1.43       | 93.65        |
| Alb10 5AB-05   | Enamel                        | 250                      | 40.66                       | 0.00        | 0.00       | 48.91      | 0.29       | 0.00       | 0.07       | 0.84        | 0.12     | 0.49      | 0.00       | 0.00       | 0.00         | 1.45       | 92.83        |
| Alb10 5AB-06   | Enamel                        | 300                      | 39.92                       | 0.00        | 0.00       | 50.23      | 0.31       | 0.00       | 0.07       | 0.80        | 0.18     | 0.46      | 0.00       | 0.00       | 0.00         | 1.43       | 93.40        |
| Alb10 5AB-07   | Enamel                        | 350                      | 40.25                       | 0.00        | 0.00       | 50.13      | 0.33       | 0.00       | 0.07       | 0.76        | 0.20     | 0.46      | 0.00       | 0.00       | 0.00         | 1.43       | 93.64        |
| Alb10 5AB-08   | Enamel                        | 400                      | 39.71                       | 0.00        | 0.00       | 49.00      | 0.32       | 0.00       | 0.05       | 0.85        | 0.13     | 0.44      | 0.00       | 0.03       | 0.00         | 1.44       | 91.96        |
| Alb10 5AB-09   | Enamel                        | 450                      | 40.65                       | 0.00        | 0.00       | 49.16      | 0.33       | 0.00       | 0.06       | 0.87        | 0.12     | 0.42      | 0.00       | 0.03       | 0.00         | 1.47       | 93.11        |
| Alb10 5AB-10   | Enamel                        | 500                      | 40.32                       | 0.00        | 0.00       | 49.37      | 0.34       | 0.00       | 0.05       | 0.86        | 0.16     | 0.44      | 0.00       | 0.03       | 0.00         | 1.45       | 93.01        |
| Alb10 5AB-11   | Enamel                        | 550                      | 40.13                       | 0.00        | 0.00       | 49.32      | 0.35       | 0.00       | 0.06       | 0.93        | 0.14     | 0.39      | 0.00       | 0.03       | 0.00         | 1.46       | 92.81        |
| Alb10 5AB-12   | Enamel                        | 600                      | 40.27                       | 0.00        | 0.05       | 48.31      | 0.34       | 0.00       | 0.07       | 0.94        | 0.17     | 0.36      | 0.00       | 0.00       | 0.00         | 1.45       | 91.95        |
| Alb10 5AB-13   | Enamel                        | 650                      | 39.81                       | 0.00        | 0.00       | 48.67      | 0.37       | 0.00       | 0.06       | 1.02        | 0.16     | 0.33      | 0.00       | 0.04       | 0.00         | 1.45       | 91.93        |
| Alb10 5AB-14   | Enamel                        | 700                      | 40.26                       | 0.00        | 0.00       | 48.31      | 0.38       | 0.00       | 0.08       | 1.04        | 0.15     | 0.31      | 0.00       | 0.00       | 0.00         | 1.47       | 92.00        |
| Alb10 5AB-15   | Enamel                        | 750                      | 40.06                       | 0.00        | 0.00       | 47.87      | 0.38       | 0.00       | 0.08       | 1.12        | 0.14     | 0.30      | 0.00       | 0.04       | 0.00         | 1.47       | 91.46        |
| Alb10 5AB-16   | Enamel                        | 800                      | 40.36                       | 0.00        | 0.00       | 48.49      | 0.43       | 0.00       | 0.05       | 1.05        | 0.16     | 0.31      | 0.00       | 0.03       | 0.00         | 1.47       | 92.36        |
| Alb10 5AB-17   | Enamel                        | 850                      | 39.85                       | 0.00        | 0.06       | 47.84      | 0.38       | 0.00       | 0.07       | 1.12        | 0.14     | 0.26      | 0.00       | 0.02       | 0.00         | 1.47       | 91.20        |
| Alb10 5AB-18   | Enamel                        | 900                      | 39.62                       | 0.00        | 0.00       | 47.64      | 0.38       | 0.00       | 0.07       | 1.16        | 0.18     | 0.23      | 0.00       | 0.05       | 0.00         | 1.45       | 90.79        |
| Alb10 5AB-19   | Enamel                        | 950                      | 40.03                       | 0.00        | 0.00       | 48.20      | 0.44       | 0.00       | 0.07       | 1.27        | 0.15     | 0.22      | 0.00       | 0.04       | 0.00         | 1.48       | 91.90        |
| Alb10 5AB-20   | Enamel                        | 1000                     | 39.92                       | 0.00        | 0.04       | 48.30      | 0.46       | 0.00       | 0.08       | 1.24        | 0.14     | 0.21      | 0.00       | 0.03       | 0.00         | 1.49       | 91.91        |
| Alb10 5AB-21   | Enamel                        | 1050                     | 39.67                       | 0.00        | 0.00       | 47.50      | 0.45       | 0.00       | 0.07       | 1.30        | 0.11     | 0.18      | 0.00       | 0.03       | 0.00         | 1.49       | 90.81        |
| Alb10 5AB-22   | Enamel                        | 1100                     | 39.49                       | 0.00        | 0.00       | 47.36      | 0.47       | 0.00       | 0.04       | 1.42        | 0.14     | 0.17      | 0.00       | 0.05       | 0.00         | 1.48       | 90.62        |
| Alb10 5AB-23   | Dentin                        | 1150                     | 28.71                       | 0.00        | 0.00       | 36.00      | 2.30       | 0.00       | 0.06       | 0.79        | 0.18     | 0.07      | 0.22       | 0.03       | 0.00         | 1.13       | 69.50        |
| Alb10 5AB-24   | Dentin                        | 1200                     | 28.94                       | 0.00        | 0.00       | 38.18      | 2.52       | 0.00       | 0.04       | 0.76        | 0.20     | 0.06      | 0.23       | 0.03       | 0.00         | 1.16       | 72.10        |
| Alb10 5AB-25   | Dentin                        | 1250                     | 29.38                       | 0.00        | 0.00       | 34.19      | 2.49       | 0.00       | 0.04       | 0.82        | 0.19     | 0.06      | 0.22       | 0.03       | 0.00         | 1.13       | 68.54        |
| Alb10 5AB-26   | Dentin                        | 1300                     | 28.99                       | 0.00        | 0.00       | 32.97      | 2.48       | 0.00       | 0.06       | 0.77        | 0.18     | 0.05      | 0.18       | 0.00       | 0.00         | 1.11       | 66.78        |
| Alb10 5AB-27   | Dentin                        | 1350                     | 29.26                       | 0.00        | 0.00       | 31.71      | 2.48       | 0.00       | 0.05       | 0.77        | 0.22     | 0.04      | 0.21       | 0.03       | 0.00         | 1.09       | 65.86        |
| Alb10 5AB-28   | Dentin                        | 1400                     | 29.04                       | 0.00        | 0.00       | 32.73      | 2.61       | 0.00       | 0.05       | 0.84        | 0.18     | 0.04      | 0.16       | 0.02       | 0.00         | 1.11       | 66.78        |
| Alb10 5AB-29   | Dentin                        | 1450                     | 28.98                       | 0.00        | 0.00       | 33.34      | 2.57       | 0.00       | 0.06       | 0.75        | 0.22     | 0.03      | 0.12       | 0.03       | 0.00         | 1.10       | 67.21        |
| Alb10 5AB-30   | Dentin                        | 1500                     | 28.35                       | 0.00        | 0.00       | 32.93      | 2.62       | 0.00       | 0.05       | 0.76        | 0.20     | 0.04      | 0.18       | 0.03       | 0.00         | 1.09       | 66.23        |

| <b>Alb10</b>   | <i>Hippopotamus amphibius</i> | Premolar                 | Lake Albert, Sebugoro Beach |             |            |            |            |            |            |             |          |           |            |            |              |            |              |
|----------------|-------------------------------|--------------------------|-----------------------------|-------------|------------|------------|------------|------------|------------|-------------|----------|-----------|------------|------------|--------------|------------|--------------|
| <b>Comment</b> | <b>Mineral</b>                | <b>Distance<br/>(µm)</b> | <b>P2O5</b>                 | <b>SiO2</b> | <b>FeO</b> | <b>CaO</b> | <b>MgO</b> | <b>MnO</b> | <b>SrO</b> | <b>Na2O</b> | <b>F</b> | <b>Cl</b> | <b>SO3</b> | <b>K2O</b> | <b>Al2O3</b> | <b>H2O</b> | <b>Total</b> |
| Alb10 L1-01    | Cement                        | 100                      | 28.48                       | 0.00        | 0.00       | 41.11      | 1.08       | 0.00       | 0.07       | 0.53        | 0.20     | 0.03      | 0.24       | 0.00       | 0.00         | 1.17       | 72.90        |
| Alb10 L1-02    | Cement                        | 400                      | 27.62                       | 0.00        | 0.00       | 40.47      | 0.98       | 0.00       | 0.10       | 0.58        | 0.27     | 0.01      | 0.26       | 0.00       | 0.00         | 1.12       | 71.41        |
| Alb10 L1-03    | Cement                        | 700                      | 27.59                       | 0.00        | 0.00       | 39.81      | 1.12       | 0.00       | 0.08       | 0.62        | 0.25     | 0.03      | 0.23       | 0.00       | 0.00         | 1.12       | 70.85        |
| Alb10 L1-04    | Enamel                        | 1000                     | 38.05                       | 0.00        | 0.00       | 47.52      | 0.55       | 0.00       | 0.08       | 1.27        | 0.17     | 0.20      | 0.00       | 0.03       | 0.00         | 1.43       | 89.31        |
| Alb10 L1-05    | Enamel                        | 1300                     | 38.69                       | 0.00        | 0.00       | 48.77      | 0.41       | 0.00       | 0.07       | 1.33        | 0.14     | 0.21      | 0.00       | 0.03       | 0.00         | 1.47       | 91.11        |
| Alb10 L1-06    | Enamel                        | 1600                     | 39.91                       | 0.00        | 0.00       | 48.24      | 0.41       | 0.00       | 0.10       | 1.17        | 0.15     | 0.20      | 0.00       | 0.04       | 0.00         | 1.49       | 91.70        |
| Alb10 L1-07    | Enamel                        | 1900                     | 39.35                       | 0.00        | 0.00       | 49.61      | 0.40       | 0.00       | 0.05       | 1.22        | 0.12     | 0.21      | 0.00       | 0.04       | 0.00         | 1.50       | 92.51        |
| Alb10 L1-08    | Enamel                        | 2200                     | 39.39                       | 0.03        | 0.00       | 49.11      | 0.45       | 0.00       | 0.08       | 1.19        | 0.15     | 0.23      | 0.05       | 0.04       | 0.00         | 1.48       | 92.19        |
| Alb10 L1-09    | Enamel                        | 2500                     | 39.02                       | 0.00        | 0.00       | 47.92      | 0.57       | 0.00       | 0.07       | 1.23        | 0.14     | 0.22      | 0.00       | 0.05       | 0.00         | 1.46       | 90.68        |
| Alb10 L1-10    | Enamel                        | 2800                     | 40.34                       | 0.00        | 0.00       | 48.73      | 0.40       | 0.00       | 0.09       | 1.21        | 0.11     | 0.20      | 0.00       | 0.04       | 0.00         | 1.52       | 92.62        |
| Alb10 L1-11    | Enamel                        | 3100                     | 39.13                       | 0.00        | 0.07       | 48.01      | 0.38       | 0.00       | 0.07       | 1.25        | 0.15     | 0.22      | 0.00       | 0.05       | 0.00         | 1.46       | 90.80        |
| Alb10 L1-12    | Enamel                        | 3400                     | 38.32                       | 0.00        | 0.00       | 48.68      | 0.39       | 0.00       | 0.08       | 1.26        | 0.15     | 0.22      | 0.00       | 0.03       | 0.00         | 1.45       | 90.57        |
| Alb10 L1-13    | Enamel                        | 3700                     | 39.58                       | 0.00        | 0.00       | 48.02      | 0.47       | 0.00       | 0.11       | 1.26        | 0.14     | 0.22      | 0.00       | 0.03       | 0.00         | 1.48       | 91.31        |
| Alb10 L1-14    | Enamel                        | 4000                     | 39.01                       | 0.00        | 0.04       | 48.47      | 0.39       | 0.00       | 0.09       | 1.13        | 0.12     | 0.23      | 0.00       | 0.03       | 0.00         | 1.48       | 90.98        |
| Alb10 L1-15    | Enamel                        | 4300                     | 38.99                       | 0.00        | 0.00       | 49.37      | 0.43       | 0.00       | 0.10       | 1.23        | 0.19     | 0.21      | 0.00       | 0.04       | 0.03         | 1.46       | 92.04        |
| Alb10 L1-16    | Enamel                        | 4600                     | 39.70                       | 0.00        | 0.00       | 48.12      | 0.51       | 0.00       | 0.09       | 1.32        | 0.13     | 0.21      | 0.00       | 0.04       | 0.03         | 1.49       | 91.65        |
| Alb10 L1-17    | Enamel                        | 4900                     | 38.45                       | 0.03        | 0.00       | 48.52      | 0.51       | 0.00       | 0.10       | 1.30        | 0.14     | 0.16      | 0.00       | 0.03       | 0.00         | 1.47       | 90.72        |
| Alb10 L1-18    | Enamel                        | 5200                     | 38.77                       | 0.00        | 0.00       | 49.12      | 0.46       | 0.00       | 0.09       | 1.21        | 0.18     | 0.20      | 0.00       | 0.05       | 0.00         | 1.46       | 91.54        |
| Alb10 L1-19    | Enamel                        | 5500                     | 39.11                       | 0.00        | 0.04       | 48.64      | 0.41       | 0.00       | 0.10       | 1.21        | 0.11     | 0.20      | 0.00       | 0.05       | 0.00         | 1.49       | 91.35        |
| Alb10 L1-20    | Enamel                        | 5800                     | 38.95                       | 0.00        | 0.04       | 48.69      | 0.39       | 0.00       | 0.10       | 1.20        | 0.16     | 0.20      | 0.00       | 0.05       | 0.00         | 1.46       | 91.24        |
| Alb10 L1-21    | Enamel                        | 6100                     | 38.62                       | 0.00        | 0.00       | 49.57      | 0.41       | 0.00       | 0.07       | 1.21        | 0.13     | 0.20      | 0.00       | 0.04       | 0.00         | 1.48       | 91.74        |
| Alb10 L1-22    | Enamel                        | 6400                     | 38.81                       | 0.00        | 0.00       | 48.80      | 0.44       | 0.00       | 0.07       | 1.26        | 0.20     | 0.19      | 0.00       | 0.04       | 0.00         | 1.45       | 91.26        |
| Alb10 L1-23    | Enamel                        | 6700                     | 39.10                       | 0.00        | 0.00       | 49.54      | 0.42       | 0.00       | 0.11       | 1.23        | 0.14     | 0.18      | 0.00       | 0.05       | 0.00         | 1.49       | 92.26        |
| Alb10 L1-24    | Enamel                        | 7000                     | 38.94                       | 0.00        | 0.00       | 48.93      | 0.53       | 0.00       | 0.09       | 1.15        | 0.14     | 0.18      | 0.00       | 0.04       | 0.00         | 1.48       | 91.49        |
| Alb10 L1-25    | Enamel                        | 7300                     | 38.79                       | 0.00        | 0.00       | 49.36      | 0.38       | 0.00       | 0.09       | 1.19        | 0.11     | 0.22      | 0.00       | 0.04       | 0.00         | 1.48       | 91.67        |
| Alb10 L1-26    | Enamel                        | 7600                     | 38.50                       | 0.00        | 0.00       | 49.56      | 0.47       | 0.00       | 0.05       | 1.11        | 0.09     | 0.23      | 0.00       | 0.02       | 0.00         | 1.49       | 91.52        |
| Alb10 L1-27    | Enamel                        | 7900                     | 39.37                       | 0.00        | 0.00       | 49.25      | 0.40       | 0.00       | 0.06       | 1.08        | 0.17     | 0.25      | 0.00       | 0.05       | 0.00         | 1.46       | 92.09        |
| Alb10 L1-28    | Enamel                        | 8200                     | 39.74                       | 0.00        | 0.05       | 50.23      | 0.36       | 0.00       | 0.03       | 1.01        | 0.15     | 0.28      | 0.00       | 0.00       | 0.00         | 1.48       | 93.32        |

| <b>Alb10 -core</b> | <i>Hippopotamus amphibius</i> |                          | Premolar    |             | Lake Albert, Sebugoro Beach |            |            |            |            |             |          |           |            |            |              |            |              |
|--------------------|-------------------------------|--------------------------|-------------|-------------|-----------------------------|------------|------------|------------|------------|-------------|----------|-----------|------------|------------|--------------|------------|--------------|
| <b>Profile</b>     | <b>Mineral</b>                | <b>Distance<br/>(µm)</b> | <b>P2O5</b> | <b>SiO2</b> | <b>FeO</b>                  | <b>CaO</b> | <b>MgO</b> | <b>MnO</b> | <b>SrO</b> | <b>Na2O</b> | <b>F</b> | <b>Cl</b> | <b>SO3</b> | <b>K2O</b> | <b>Al2O3</b> | <b>H2O</b> | <b>Total</b> |
| Alb10-1 AB-01      | Enamel                        | 30                       | 39.57       | 0.00        | 0.19                        | 51.10      | 0.38       | 0.05       | 0.08       | 0.75        | 0.10     | 0.48      | 0.00       | 0.05       | 0.00         | 1.45       | 94.19        |
| Alb10-1 AB-02      | Enamel                        | 55                       | 39.14       | 0.00        | 0.08                        | 51.94      | 0.37       | 0.00       | 0.04       | 0.75        | 0.10     | 0.48      | 0.00       | 0.00       | 0.00         | 1.45       | 94.35        |
| Alb10-1 AB-03      | Enamel                        | 110                      | 39.57       | 0.00        | 0.09                        | 51.46      | 0.37       | 0.00       | 0.06       | 0.75        | 0.14     | 0.48      | 0.00       | 0.05       | 0.00         | 1.44       | 94.39        |
| Alb10-1 AB-04      | Enamel                        | 165                      | 39.54       | 0.00        | 0.08                        | 51.71      | 0.37       | 0.00       | 0.06       | 0.74        | 0.15     | 0.43      | 0.06       | 0.04       | 0.00         | 1.45       | 94.63        |
| Alb10-1 AB-05      | Enamel                        | 220                      | 39.37       | 0.00        | 0.00                        | 51.70      | 0.38       | 0.00       | 0.03       | 0.77        | 0.13     | 0.45      | 0.00       | 0.03       | 0.00         | 1.45       | 94.30        |
| Alb10-1 AB-06      | Enamel                        | 275                      | 39.28       | 0.00        | 0.00                        | 51.80      | 0.39       | 0.00       | 0.04       | 0.74        | 0.13     | 0.44      | 0.00       | 0.01       | 0.00         | 1.44       | 94.29        |
| Alb10-1 AB-07      | Enamel                        | 330                      | 39.27       | 0.00        | 0.00                        | 51.64      | 0.39       | 0.00       | 0.05       | 0.73        | 0.09     | 0.43      | 0.05       | 0.00       | 0.02         | 1.47       | 94.12        |
| Alb10-1 AB-08      | Enamel                        | 385                      | 39.09       | 0.00        | 0.00                        | 51.50      | 0.40       | 0.04       | 0.04       | 0.79        | 0.10     | 0.40      | 0.00       | 0.01       | 0.00         | 1.46       | 93.84        |
| Alb10-1 AB-09      | Enamel                        | 440                      | 39.72       | 0.07        | 0.00                        | 51.46      | 0.37       | 0.00       | 0.05       | 0.81        | 0.10     | 0.40      | 0.05       | 0.03       | 0.00         | 1.48       | 94.53        |
| Alb10-1 AB-10      | Enamel                        | 495                      | 39.46       | 0.00        | 0.00                        | 51.55      | 0.39       | 0.00       | 0.08       | 0.88        | 0.12     | 0.40      | 0.00       | 0.03       | 0.02         | 1.47       | 94.39        |
| Alb10-1 AB-11      | Enamel                        | 550                      | 39.32       | 0.00        | 0.00                        | 51.95      | 0.41       | 0.00       | 0.08       | 0.85        | 0.10     | 0.36      | 0.00       | 0.03       | 0.00         | 1.49       | 94.59        |
| Alb10-1 AB-12      | Enamel                        | 605                      | 39.25       | 0.00        | 0.00                        | 51.72      | 0.41       | 0.00       | 0.06       | 0.81        | 0.12     | 0.34      | 0.05       | 0.03       | 0.00         | 1.48       | 94.27        |
| Alb10-1 AB-13      | Enamel                        | 660                      | 39.58       | 0.00        | 0.00                        | 51.52      | 0.42       | 0.00       | 0.07       | 0.87        | 0.11     | 0.36      | 0.00       | 0.04       | 0.00         | 1.48       | 94.45        |
| Alb10-1 AB-14      | Enamel                        | 715                      | 38.91       | 0.00        | 0.00                        | 51.37      | 0.48       | 0.00       | 0.06       | 0.87        | 0.10     | 0.35      | 0.00       | 0.02       | 0.00         | 1.47       | 93.62        |
| Alb10-1 AB-15      | Enamel                        | 770                      | 38.91       | 0.00        | 0.00                        | 50.96      | 0.43       | 0.00       | 0.05       | 0.97        | 0.09     | 0.32      | 0.00       | 0.04       | 0.00         | 1.48       | 93.25        |
| Alb10-1 AB-16      | Enamel                        | 825                      | 39.60       | 0.00        | 0.00                        | 51.00      | 0.39       | 0.00       | 0.07       | 1.01        | 0.11     | 0.32      | 0.00       | 0.03       | 0.00         | 1.49       | 94.01        |
| Alb10-1 AB-17      | Enamel                        | 880                      | 39.08       | 0.00        | 0.00                        | 51.09      | 0.40       | 0.00       | 0.07       | 1.02        | 0.08     | 0.29      | 0.00       | 0.03       | 0.00         | 1.50       | 93.54        |
| Alb10-1 AB-18      | Enamel                        | 935                      | 38.76       | 0.00        | 0.00                        | 51.10      | 0.42       | 0.00       | 0.08       | 1.03        | 0.10     | 0.28      | 0.00       | 0.04       | 0.00         | 1.48       | 93.29        |
| Alb10-1 AB-19      | Enamel                        | 990                      | 38.72       | 0.00        | 0.00                        | 51.05      | 0.41       | 0.00       | 0.04       | 1.02        | 0.10     | 0.28      | 0.00       | 0.04       | 0.00         | 1.48       | 93.15        |
| Alb10-1 AB-20      | Enamel                        | 1045                     | 38.88       | 0.00        | 0.04                        | 51.12      | 0.41       | 0.00       | 0.07       | 1.02        | 0.06     | 0.25      | 0.00       | 0.05       | 0.00         | 1.51       | 93.41        |
| Alb10-1 AB-21      | Enamel                        | 1100                     | 38.81       | 0.00        | 0.07                        | 50.97      | 0.39       | 0.00       | 0.03       | 1.14        | 0.13     | 0.25      | 0.00       | 0.03       | 0.00         | 1.48       | 93.29        |
| Alb10-1 AB-22      | Enamel                        | 1155                     | 38.56       | 0.00        | 0.00                        | 50.35      | 0.41       | 0.00       | 0.05       | 1.03        | 0.10     | 0.23      | 0.05       | 0.03       | 0.00         | 1.48       | 92.30        |
| Alb10-1 AB-23      | Enamel                        | 1210                     | 38.66       | 0.00        | 0.00                        | 50.18      | 0.48       | 0.06       | 0.11       | 1.22        | 0.11     | 0.19      | 0.00       | 0.06       | 0.00         | 1.49       | 92.56        |
| Alb10-1 AB-24      | Enamel                        | 1265                     | 38.40       | 0.05        | 0.00                        | 50.20      | 0.56       | 0.00       | 0.07       | 1.25        | 0.08     | 0.16      | 0.00       | 0.06       | 0.00         | 1.51       | 92.33        |
| Alb10-1 AB-25      | Dentin                        | 1320                     | 28.33       | 0.00        | 0.00                        | 41.59      | 2.27       | 0.00       | 0.06       | 0.69        | 0.14     | 0.12      | 0.22       | 0.04       | 0.00         | 1.16       | 74.62        |
| Alb10-1 AB-26      | Dentin                        | 1375                     | 28.22       | 0.00        | 0.00                        | 41.58      | 2.54       | 0.00       | 0.07       | 0.73        | 0.13     | 0.09      | 0.22       | 0.03       | 0.00         | 1.18       | 74.80        |
| Alb10-1 AB-27      | Dentin                        | 1430                     | 28.06       | 0.00        | 0.00                        | 40.03      | 2.51       | 0.00       | 0.05       | 0.83        | 0.15     | 0.08      | 0.19       | 0.05       | 0.00         | 1.15       | 73.10        |
| Alb10-1 AB-28      | Dentin                        | 1485                     | 27.77       | 0.00        | 0.00                        | 39.40      | 2.58       | 0.00       | 0.06       | 0.74        | 0.09     | 0.09      | 0.26       | 0.03       | 0.00         | 1.16       | 72.17        |
| Alb10-1 AB-29      | Dentin                        | 1540                     | 27.25       | 0.00        | 0.00                        | 38.09      | 2.62       | 0.00       | 0.03       | 0.77        | 0.10     | 0.06      | 0.22       | 0.03       | 0.03         | 1.13       | 70.34        |
| Alb10-1 AB-30      | Dentin                        | 1595                     | 27.38       | 0.00        | 0.00                        | 36.82      | 2.63       | 0.00       | 0.03       | 0.74        | 0.11     | 0.05      | 0.20       | 0.01       | 0.00         | 1.12       | 69.09        |

| <b>Alb10 -core</b> | <i>Hippopotamus amphibius</i> | Premolar                                       | Lake Albert, Sebugoro Beach |             |            |            |            |            |            |             |          |           |            |            |              |            |              |
|--------------------|-------------------------------|------------------------------------------------|-----------------------------|-------------|------------|------------|------------|------------|------------|-------------|----------|-----------|------------|------------|--------------|------------|--------------|
| <b>Profile</b>     | <b>Mineral</b>                | <b>Distance<br/>(<math>\mu\text{m}</math>)</b> | <b>P2O5</b>                 | <b>SiO2</b> | <b>FeO</b> | <b>CaO</b> | <b>MgO</b> | <b>MnO</b> | <b>SrO</b> | <b>Na2O</b> | <b>F</b> | <b>Cl</b> | <b>SO3</b> | <b>K2O</b> | <b>Al2O3</b> | <b>H2O</b> | <b>Total</b> |
| Alb10-2 AB-01      | Enamel                        | 30                                             | 39.53                       | 0.00        | 0.05       | 51.38      | 0.32       | 0.00       | 0.05       | 0.70        | 0.13     | 0.60      | 0.07       | 0.01       | 0.00         | 1.41       | 94.25        |
| Alb10-2 AB-02      | Enamel                        | 52                                             | 39.61                       | 0.00        | 0.00       | 51.70      | 0.34       | 0.00       | 0.04       | 0.71        | 0.10     | 0.55      | 0.00       | 0.01       | 0.00         | 1.44       | 94.49        |
| Alb10-2 AB-03      | Enamel                        | 104                                            | 39.52                       | 0.00        | 0.00       | 51.15      | 0.34       | 0.00       | 0.04       | 0.69        | 0.12     | 0.55      | 0.00       | 0.00       | 0.00         | 1.42       | 93.82        |
| Alb10-2 AB-04      | Enamel                        | 156                                            | 39.81                       | 0.00        | 0.00       | 51.43      | 0.38       | 0.00       | 0.05       | 0.67        | 0.12     | 0.54      | 0.00       | 0.01       | 0.00         | 1.44       | 94.45        |
| Alb10-2 AB-05      | Enamel                        | 208                                            | 39.47                       | 0.00        | 0.00       | 51.48      | 0.34       | 0.00       | 0.04       | 0.71        | 0.09     | 0.49      | 0.00       | 0.04       | 0.00         | 1.45       | 94.11        |
| Alb10-2 AB-06      | Enamel                        | 260                                            | 39.82                       | 0.00        | 0.00       | 50.80      | 0.36       | 0.00       | 0.05       | 0.77        | 0.09     | 0.49      | 0.00       | 0.02       | 0.00         | 1.45       | 93.85        |
| Alb10-2 AB-07      | Enamel                        | 312                                            | 39.77                       | 0.00        | 0.00       | 51.25      | 0.34       | 0.00       | 0.04       | 0.77        | 0.12     | 0.48      | 0.05       | 0.02       | 0.00         | 1.45       | 94.28        |
| Alb10-2 AB-08      | Enamel                        | 364                                            | 39.84                       | 0.00        | 0.00       | 51.63      | 0.34       | 0.00       | 0.06       | 0.82        | 0.10     | 0.45      | 0.00       | 0.00       | 0.00         | 1.47       | 94.71        |
| Alb10-2 AB-09      | Enamel                        | 416                                            | 39.59                       | 0.00        | 0.00       | 51.24      | 0.33       | 0.00       | 0.05       | 0.76        | 0.12     | 0.46      | 0.00       | 0.02       | 0.00         | 1.45       | 94.01        |
| Alb10-2 AB-10      | Enamel                        | 468                                            | 39.84                       | 0.04        | 0.00       | 51.03      | 0.35       | 0.00       | 0.05       | 0.83        | 0.09     | 0.41      | 0.00       | 0.02       | 0.00         | 1.48       | 94.15        |
| Alb10-2 AB-11      | Enamel                        | 520                                            | 39.40                       | 0.00        | 0.00       | 51.04      | 0.39       | 0.00       | 0.06       | 0.86        | 0.10     | 0.39      | 0.00       | 0.02       | 0.00         | 1.47       | 93.73        |
| Alb10-2 AB-12      | Enamel                        | 572                                            | 39.44                       | 0.00        | 0.00       | 50.71      | 0.42       | 0.00       | 0.04       | 0.89        | 0.05     | 0.39      | 0.00       | 0.03       | 0.00         | 1.49       | 93.45        |
| Alb10-2 AB-13      | Enamel                        | 624                                            | 39.51                       | 0.00        | 0.00       | 51.24      | 0.40       | 0.00       | 0.09       | 0.85        | 0.11     | 0.36      | 0.00       | 0.03       | 0.00         | 1.47       | 94.08        |
| Alb10-2 AB-14      | Enamel                        | 676                                            | 38.70                       | 0.00        | 0.00       | 51.02      | 0.41       | 0.00       | 0.08       | 0.91        | 0.12     | 0.35      | 0.00       | 0.04       | 0.00         | 1.45       | 93.07        |
| Alb10-2 AB-15      | Enamel                        | 728                                            | 38.70                       | 0.00        | 0.04       | 50.18      | 0.48       | 0.00       | 0.08       | 1.01        | 0.10     | 0.33      | 0.00       | 0.02       | 0.00         | 1.46       | 92.40        |
| Alb10-2 AB-16      | Enamel                        | 780                                            | 39.57                       | 0.00        | 0.00       | 50.49      | 0.48       | 0.00       | 0.06       | 1.03        | 0.10     | 0.33      | 0.00       | 0.04       | 0.00         | 1.48       | 93.58        |
| Alb10-2 AB-17      | Enamel                        | 832                                            | 39.02                       | 0.00        | 0.04       | 50.81      | 0.45       | 0.00       | 0.09       | 1.00        | 0.11     | 0.29      | 0.00       | 0.02       | 0.00         | 1.48       | 93.30        |
| Alb10-2 AB-18      | Enamel                        | 884                                            | 39.16                       | 0.00        | 0.00       | 50.79      | 0.45       | 0.00       | 0.05       | 1.02        | 0.10     | 0.29      | 0.00       | 0.03       | 0.00         | 1.49       | 93.36        |
| Alb10-2 AB-19      | Enamel                        | 936                                            | 39.64                       | 0.00        | 0.00       | 50.53      | 0.45       | 0.04       | 0.04       | 1.09        | 0.09     | 0.28      | 0.00       | 0.04       | 0.03         | 1.50       | 93.73        |
| Alb10-2 AB-20      | Enamel                        | 988                                            | 38.55                       | 0.00        | 0.04       | 50.09      | 0.44       | 0.00       | 0.07       | 1.09        | 0.10     | 0.23      | 0.00       | 0.04       | 0.00         | 1.48       | 92.12        |
| Alb10-2 AB-21      | Enamel                        | 1040                                           | 38.80                       | 0.00        | 0.00       | 50.51      | 0.43       | 0.00       | 0.06       | 1.10        | 0.12     | 0.23      | 0.00       | 0.05       | 0.00         | 1.48       | 92.78        |
| Alb10-2 AB-22      | Enamel                        | 1092                                           | 38.43                       | 0.00        | 0.00       | 50.25      | 0.45       | 0.00       | 0.07       | 1.17        | 0.09     | 0.21      | 0.00       | 0.05       | 0.00         | 1.49       | 92.20        |
| Alb10-2 AB-23      | Enamel                        | 1144                                           | 38.81                       | 0.00        | 0.00       | 49.87      | 0.53       | 0.00       | 0.07       | 1.30        | 0.05     | 0.19      | 0.00       | 0.05       | 0.00         | 1.52       | 92.38        |
| Alb10-2 AB-24      | Dentin                        | 1196                                           | 30.46                       | 0.00        | 0.00       | 42.35      | 2.09       | 0.00       | 0.05       | 0.72        | 0.09     | 0.17      | 0.21       | 0.00       | 0.00         | 1.23       | 77.38        |
| Alb10-2 AB-25      | Dentin                        | 1248                                           | 27.81                       | 0.00        | 0.00       | 41.66      | 2.46       | 0.00       | 0.04       | 0.69        | 0.13     | 0.11      | 0.23       | 0.03       | 0.00         | 1.16       | 74.33        |
| Alb10-2 AB-26      | Dentin                        | 1300                                           | 28.16                       | 0.00        | 0.00       | 40.86      | 2.48       | 0.00       | 0.05       | 0.81        | 0.19     | 0.13      | 0.26       | 0.04       | 0.00         | 1.13       | 74.11        |
| Alb10-2 AB-27      | Dentin                        | 1352                                           | 27.94                       | 0.00        | 0.00       | 34.80      | 2.31       | 0.00       | 0.06       | 0.77        | 0.12     | 0.09      | 0.23       | 0.01       | 0.00         | 1.09       | 67.43        |
| Alb10-2 AB-28      | Dentin                        | 1404                                           | 27.78                       | 0.00        | 0.06       | 35.24      | 2.46       | 0.00       | 0.05       | 0.63        | 0.13     | 0.09      | 0.18       | 0.02       | 0.00         | 1.09       | 67.72        |
| Alb10-2 AB-29      | Dentin                        | 1456                                           | 28.05                       | 1.76        | 0.00       | 38.38      | 2.61       | 0.00       | 0.06       | 0.76        | 0.15     | 0.06      | 0.21       | 0.03       | 0.00         | 1.17       | 73.24        |
| Alb10-2 AB-30      | Dentin                        | 1508                                           | 29.32                       | 0.00        | 0.00       | 41.69      | 2.95       | 0.00       | 0.05       | 0.71        | 0.13     | 0.07      | 0.26       | 0.02       | 0.00         | 1.22       | 76.41        |



| Mal-8        | <i>Hippopotamus amphibius</i> | Molar M3      | Lake Malawi, Senga Bay |      |      |       |      |      |      | Buy, Safari Beach Lodge |      |      |      |      |       |      |       |
|--------------|-------------------------------|---------------|------------------------|------|------|-------|------|------|------|-------------------------|------|------|------|------|-------|------|-------|
| Profile      | Mineral                       | Distance (µm) | P2O5                   | SiO2 | FeO  | CaO   | MgO  | MnO  | SrO  | Na2O                    | F    | Cl   | SO3  | K2O  | Al2O3 | H2O  | Total |
| Mal-8-1AB-01 | Cement                        | 75            | 26.91                  | 0.18 | 0.00 | 41.58 | 0.91 | 0.00 | 0.09 | 0.96                    | 0.26 | 0.03 | 0.35 | 0.03 | 0.00  | 1.13 | 72.43 |
| Mal-8-1AB-02 | Enamel                        | 224           | 38.15                  | 0.09 | 0.00 | 50.22 | 0.56 | 0.00 | 0.07 | 1.00                    | 0.36 | 0.50 | 0.15 | 0.03 | 0.00  | 1.32 | 92.44 |
| Mal-8-1AB-03 | Enamel                        | 373           | 38.78                  | 0.08 | 0.03 | 50.70 | 0.41 | 0.00 | 0.06 | 0.88                    | 0.18 | 0.52 | 0.07 | 0.00 | 0.00  | 1.41 | 93.11 |
| Mal-8-1AB-04 | Enamel                        | 522           | 37.46                  | 0.05 | 0.00 | 50.72 | 0.52 | 0.00 | 0.07 | 0.97                    | 0.20 | 0.44 | 0.13 | 0.04 | 0.00  | 1.39 | 91.98 |
| Mal-8-1AB-05 | Enamel                        | 671           | 38.01                  | 0.00 | 0.03 | 50.38 | 0.67 | 0.00 | 0.06 | 0.97                    | 0.22 | 0.46 | 0.10 | 0.00 | 0.00  | 1.39 | 92.29 |
| Mal-8-1AB-06 | Enamel                        | 820           | 38.81                  | 0.00 | 0.00 | 50.17 | 0.81 | 0.00 | 0.05 | 0.88                    | 0.18 | 0.43 | 0.12 | 0.03 | 0.00  | 1.43 | 92.91 |
| Mal-8-1AB-07 | Enamel                        | 969           | 38.57                  | 0.00 | 0.00 | 50.40 | 0.64 | 0.00 | 0.05 | 0.90                    | 0.19 | 0.44 | 0.06 | 0.02 | 0.00  | 1.41 | 92.69 |
| Mal-8-1AB-08 | Enamel                        | 1118          | 38.49                  | 0.00 | 0.04 | 51.41 | 0.38 | 0.00 | 0.05 | 0.91                    | 0.16 | 0.50 | 0.08 | 0.00 | 0.00  | 1.42 | 93.43 |
| Mal-8-1AB-09 | Enamel                        | 1267          | 37.96                  | 0.08 | 0.04 | 51.20 | 0.40 | 0.00 | 0.07 | 1.07                    | 0.15 | 0.48 | 0.09 | 0.02 | 0.00  | 1.42 | 92.97 |
| Mal-8-1AB-10 | Enamel                        | 1416          | 38.15                  | 0.04 | 0.03 | 50.99 | 0.50 | 0.00 | 0.07 | 0.97                    | 0.21 | 0.44 | 0.12 | 0.03 | 0.00  | 1.40 | 92.95 |
| Mal-8-1AB-11 | Enamel                        | 1565          | 38.78                  | 0.08 | 0.00 | 51.16 | 0.51 | 0.00 | 0.05 | 0.92                    | 0.21 | 0.45 | 0.00 | 0.00 | 0.03  | 1.41 | 93.60 |
| Mal-8-1AB-12 | Enamel                        | 1714          | 37.99                  | 0.05 | 0.00 | 50.91 | 0.39 | 0.00 | 0.03 | 1.01                    | 0.20 | 0.39 | 0.11 | 0.03 | 0.00  | 1.41 | 92.53 |
| Mal-8-1AB-13 | Enamel                        | 1863          | 38.27                  | 0.10 | 0.00 | 51.11 | 0.42 | 0.00 | 0.06 | 1.02                    | 0.22 | 0.38 | 0.13 | 0.03 | 0.00  | 1.42 | 93.16 |
| Mal-8-1AB-14 | Enamel                        | 2012          | 37.61                  | 0.05 | 0.00 | 50.81 | 0.45 | 0.00 | 0.07 | 1.08                    | 0.17 | 0.39 | 0.08 | 0.04 | 0.00  | 1.42 | 92.16 |
| Mal-8-1AB-15 | Enamel                        | 2161          | 38.25                  | 0.07 | 0.04 | 51.17 | 0.40 | 0.00 | 0.07 | 1.11                    | 0.26 | 0.37 | 0.07 | 0.03 | 0.00  | 1.40 | 93.24 |
| Mal-8-1AB-16 | Enamel                        | 2310          | 37.12                  | 0.06 | 0.03 | 49.70 | 0.46 | 0.00 | 0.07 | 1.04                    | 0.21 | 0.32 | 0.11 | 0.03 | 0.00  | 1.39 | 90.55 |
| Mal-8-1AB-17 | Enamel                        | 2459          | 37.77                  | 0.00 | 0.00 | 50.46 | 0.39 | 0.00 | 0.09 | 1.08                    | 0.19 | 0.32 | 0.10 | 0.02 | 0.00  | 1.42 | 91.85 |
| Mal-8-1AB-18 | Enamel                        | 2608          | 36.22                  | 0.16 | 0.00 | 49.02 | 0.38 | 0.00 | 0.08 | 1.07                    | 0.23 | 0.28 | 0.07 | 0.02 | 0.00  | 1.36 | 88.90 |
| Mal-8-1AB-19 | Enamel                        | 2757          | 37.47                  | 0.21 | 0.00 | 50.57 | 0.36 | 0.00 | 0.11 | 1.05                    | 0.22 | 0.29 | 0.08 | 0.04 | 0.00  | 1.41 | 91.80 |
| Mal-8-1AB-20 | Enamel                        | 2906          | 35.51                  | 0.14 | 0.00 | 49.30 | 0.34 | 0.00 | 0.03 | 1.20                    | 0.20 | 0.25 | 0.00 | 0.03 | 0.00  | 1.37 | 88.36 |
| Mal-8-1AB-21 | Enamel                        | 3055          | 37.85                  | 0.19 | 0.00 | 49.50 | 0.40 | 0.00 | 0.08 | 1.28                    | 0.19 | 0.22 | 0.06 | 0.06 | 0.00  | 1.44 | 91.27 |
| Mal-8-1AB-22 | Enamel                        | 3204          | 36.66                  | 0.17 | 0.00 | 48.91 | 0.37 | 0.00 | 0.06 | 1.29                    | 0.23 | 0.22 | 0.05 | 0.02 | 0.00  | 1.39 | 89.36 |
| Mal-8-1AB-23 | Enamel                        | 3353          | 37.49                  | 0.82 | 0.00 | 49.09 | 0.42 | 0.00 | 0.07 | 1.23                    | 0.21 | 0.18 | 0.08 | 0.02 | 0.00  | 1.44 | 91.03 |
| Mal-8-1AB-24 | Enamel                        | 3502          | 35.99                  | 0.45 | 0.00 | 48.59 | 0.41 | 0.00 | 0.07 | 1.29                    | 0.18 | 0.17 | 0.09 | 0.05 | 0.00  | 1.41 | 88.68 |
| Mal-8-1AB-25 | dentin                        | 3651          | 30.65                  | 0.39 | 0.03 | 43.42 | 0.93 | 0.00 | 0.08 | 1.04                    | 0.21 | 0.11 | 0.26 | 0.04 | 0.00  | 1.24 | 78.39 |
| Mal-8-1AB-26 | dentin                        | 3800          | 29.25                  | 1.17 | 0.05 | 41.68 | 2.12 | 0.00 | 0.07 | 1.09                    | 0.26 | 0.07 | 0.27 | 0.00 | 0.00  | 1.21 | 77.24 |
| Mal-8-1AB-27 | dentin                        | 3949          | 29.57                  | 2.08 | 0.04 | 41.84 | 2.11 | 0.00 | 0.07 | 1.11                    | 0.20 | 0.06 | 0.29 | 0.02 | 0.00  | 1.26 | 78.65 |
| Mal-8-1AB-28 | dentin                        | 4098          | 29.90                  | 3.67 | 0.00 | 41.66 | 2.22 | 0.00 | 0.06 | 1.09                    | 0.21 | 0.05 | 0.28 | 0.04 | 0.00  | 1.30 | 80.48 |
| Mal-8-1AB-29 | dentin                        | 4247          | 30.84                  | 0.73 | 0.05 | 42.65 | 2.67 | 0.00 | 0.06 | 1.09                    | 0.25 | 0.04 | 0.24 | 0.04 | 0.00  | 1.27 | 79.92 |
| Mal-8-1AB-30 | dentin                        | 4396          | 30.38                  | 1.18 | 0.00 | 41.39 | 2.31 | 0.00 | 0.06 | 1.13                    | 0.28 | 0.05 | 0.29 | 0.03 | 0.00  | 1.23 | 78.34 |

| Mal-8        | <i>Hippopotamus amphibius</i> | Molar M3                      | Lake Malawi, Senga Bay |      |      |       |      |      |      | Buy, Safari Beach Lodge |      |      |      |      |       |      |       |
|--------------|-------------------------------|-------------------------------|------------------------|------|------|-------|------|------|------|-------------------------|------|------|------|------|-------|------|-------|
| Profile      | Mineral                       | Distance<br>( $\mu\text{m}$ ) | P2O5                   | SiO2 | FeO  | CaO   | MgO  | MnO  | SrO  | Na2O                    | F    | Cl   | SO3  | K2O  | Al2O3 | H2O  | Total |
| Mal-8-1CD-01 | Cement                        | 75                            | 27.70                  | 1.69 | 0.04 | 41.73 | 1.01 | 0.00 | 0.04 | 0.67                    | 0.61 | 0.07 | 0.39 | 0.02 | 0.00  | 1.05 | 75.00 |
| Mal-8-1CD-02 | Cement                        | 282                           | 27.62                  | 1.00 | 0.04 | 42.46 | 1.07 | 0.00 | 0.05 | 0.85                    | 0.48 | 0.05 | 0.36 | 0.04 | 0.03  | 1.10 | 75.16 |
| Mal-8-1CD-03 | Enamel                        | 489                           | 37.59                  | 0.21 | 0.00 | 50.65 | 0.33 | 0.00 | 0.05 | 0.70                    | 0.22 | 0.59 | 0.15 | 0.03 | 0.00  | 1.35 | 91.87 |
| Mal-8-1CD-04 | Enamel                        | 696                           | 39.31                  | 0.17 | 0.00 | 51.31 | 0.27 | 0.00 | 0.03 | 0.67                    | 0.19 | 0.63 | 0.10 | 0.04 | 0.00  | 1.39 | 94.10 |
| Mal-8-1CD-05 | Enamel                        | 903                           | 38.18                  | 0.19 | 0.06 | 51.29 | 0.27 | 0.00 | 0.07 | 0.69                    | 0.21 | 0.61 | 0.08 | 0.00 | 0.00  | 1.36 | 93.00 |
| Mal-8-1CD-06 | Enamel                        | 1110                          | 38.01                  | 0.09 | 0.00 | 51.40 | 0.25 | 0.00 | 0.07 | 0.79                    | 0.20 | 0.60 | 0.00 | 0.04 | 0.00  | 1.37 | 92.80 |
| Mal-8-1CD-07 | Enamel                        | 1317                          | 38.26                  | 0.14 | 0.00 | 51.12 | 0.26 | 0.00 | 0.06 | 0.75                    | 0.18 | 0.54 | 0.00 | 0.04 | 0.00  | 1.39 | 92.73 |
| Mal-8-1CD-08 | Enamel                        | 1524                          | 37.70                  | 0.55 | 0.06 | 50.94 | 0.29 | 0.00 | 0.00 | 0.82                    | 0.19 | 0.46 | 0.07 | 0.03 | 0.00  | 1.40 | 92.52 |
| Mal-8-1CD-09 | Enamel                        | 1731                          | 36.53                  | 1.37 | 0.00 | 50.51 | 0.29 | 0.00 | 0.07 | 0.91                    | 0.18 | 0.44 | 0.11 | 0.03 | 0.00  | 1.40 | 91.81 |
| Mal-8-1CD-10 | Enamel                        | 1938                          | 38.74                  | 0.09 | 0.00 | 51.42 | 0.33 | 0.00 | 0.05 | 0.91                    | 0.20 | 0.44 | 0.08 | 0.00 | 0.00  | 1.42 | 93.69 |
| Mal-8-1CD-11 | Enamel                        | 2145                          | 37.33                  | 1.35 | 0.04 | 50.51 | 0.30 | 0.00 | 0.07 | 0.88                    | 0.20 | 0.41 | 0.05 | 0.03 | 0.00  | 1.41 | 92.58 |
| Mal-8-1CD-12 | Enamel                        | 2352                          | 36.97                  | 0.44 | 0.00 | 51.03 | 0.30 | 0.00 | 0.05 | 0.96                    | 0.18 | 0.38 | 0.05 | 0.02 | 0.00  | 1.40 | 91.80 |
| Mal-8-1CD-13 | Enamel                        | 2559                          | 37.89                  | 1.44 | 0.00 | 50.42 | 0.33 | 0.00 | 0.09 | 1.04                    | 0.20 | 0.36 | 0.08 | 0.04 | 0.00  | 1.44 | 93.32 |
| Mal-8-1CD-14 | Enamel                        | 2766                          | 37.40                  | 0.15 | 0.00 | 50.64 | 0.31 | 0.00 | 0.04 | 0.97                    | 0.21 | 0.35 | 0.07 | 0.03 | 0.00  | 1.40 | 91.58 |
| Mal-8-1CD-15 | Enamel                        | 2973                          | 37.64                  | 0.15 | 0.00 | 50.43 | 0.34 | 0.00 | 0.09 | 1.05                    | 0.18 | 0.31 | 0.08 | 0.00 | 0.00  | 1.43 | 91.69 |
| Mal-8-1CD-16 | Enamel                        | 3180                          | 36.25                  | 1.32 | 0.00 | 50.07 | 0.35 | 0.00 | 0.07 | 1.14                    | 0.25 | 0.29 | 0.05 | 0.02 | 0.00  | 1.39 | 91.20 |
| Mal-8-1CD-17 | Enamel                        | 3387                          | 37.13                  | 0.24 | 0.00 | 50.10 | 0.34 | 0.00 | 0.11 | 1.11                    | 0.24 | 0.29 | 0.07 | 0.04 | 0.00  | 1.39 | 91.07 |
| Mal-8-1CD-18 | Enamel                        | 3594                          | 36.91                  | 0.32 | 0.05 | 50.43 | 0.33 | 0.00 | 0.07 | 1.02                    | 0.24 | 0.28 | 0.09 | 0.00 | 0.00  | 1.39 | 91.15 |
| Mal-8-1CD-19 | Enamel                        | 3801                          | 37.68                  | 0.22 | 0.07 | 50.07 | 0.34 | 0.00 | 0.04 | 1.09                    | 0.22 | 0.25 | 0.06 | 0.05 | 0.00  | 1.42 | 91.51 |
| Mal-8-1CD-20 | Enamel                        | 4008                          | 37.61                  | 0.60 | 0.00 | 50.00 | 0.38 | 0.00 | 0.08 | 1.22                    | 0.24 | 0.23 | 0.00 | 0.02 | 0.00  | 1.42 | 91.79 |
| Mal-8-1CD-21 | Enamel                        | 4215                          | 36.31                  | 3.45 | 0.00 | 48.05 | 0.39 | 0.00 | 0.07 | 1.10                    | 0.22 | 0.21 | 0.07 | 0.04 | 0.00  | 1.45 | 91.35 |
| Mal-8-1CD-22 | Enamel                        | 4422                          | 37.34                  | 1.84 | 0.00 | 49.34 | 0.42 | 0.00 | 0.09 | 1.28                    | 0.22 | 0.18 | 0.07 | 0.04 | 0.00  | 1.46 | 92.29 |
| Mal-8-1CD-23 | Enamel                        | 4629                          | 37.10                  | 2.12 | 0.00 | 49.35 | 0.42 | 0.00 | 0.08 | 1.27                    | 0.23 | 0.21 | 0.08 | 0.04 | 0.00  | 1.45 | 92.34 |
| Mal-8-1CD-24 | Enamel                        | 4836                          | 36.84                  | 1.78 | 0.00 | 48.57 | 0.43 | 0.00 | 0.08 | 1.29                    | 0.18 | 0.16 | 0.06 | 0.04 | 0.00  | 1.46 | 90.89 |
| Mal-8-1CD-25 | Dentin                        | 5043                          | 31.31                  | 0.88 | 0.00 | 43.59 | 0.65 | 0.00 | 0.08 | 1.02                    | 0.20 | 0.14 | 0.21 | 0.00 | 0.00  | 1.26 | 79.33 |
| Mal-8-1CD-26 | Dentin                        | 5250                          | 30.95                  | 0.70 | 0.00 | 43.62 | 1.38 | 0.00 | 0.09 | 0.96                    | 0.21 | 0.11 | 0.29 | 0.03 | 0.00  | 1.26 | 79.60 |
| Mal-8-1CD-27 | Dentin                        | 5457                          | 30.11                  | 1.99 | 0.00 | 42.05 | 1.94 | 0.00 | 0.05 | 1.14                    | 0.26 | 0.09 | 0.31 | 0.04 | 0.00  | 1.25 | 79.22 |
| Mal-8-1CD-28 | Dentin                        | 5664                          | 31.29                  | 0.53 | 0.00 | 43.41 | 2.00 | 0.00 | 0.09 | 0.93                    | 0.19 | 0.09 | 0.28 | 0.02 | 0.00  | 1.28 | 80.10 |
| Mal-8-1CD-29 | Dentin                        | 5871                          | 31.58                  | 2.32 | 0.04 | 42.36 | 1.97 | 0.00 | 0.09 | 1.16                    | 0.24 | 0.07 | 0.30 | 0.03 | 0.04  | 1.30 | 81.49 |
| Mal-8-1CD-30 | Dentin                        | 6078                          | 31.40                  | 0.35 | 0.00 | 42.78 | 2.09 | 0.00 | 0.10 | 1.17                    | 0.21 | 0.06 | 0.39 | 0.02 | 0.00  | 1.28 | 79.85 |

| Mal-8        | <i>Hippopotamus amphibius</i> | Molar M3      | Lake Malawi, Senga Bay |      |      |       |      |      |      | Buy, Safari Beach Lodge |      |      |      |      |       |      |       |
|--------------|-------------------------------|---------------|------------------------|------|------|-------|------|------|------|-------------------------|------|------|------|------|-------|------|-------|
| Profile      | Mineral                       | Distance (µm) | P2O5                   | SiO2 | FeO  | CaO   | MgO  | MnO  | SrO  | Na2O                    | F    | Cl   | SO3  | K2O  | Al2O3 | H2O  | Total |
| Mal-8-1EF-01 | Cement                        | 60            | 27.87                  | 1.84 | 0.00 | 40.83 | 0.92 | 0.00 | 0.06 | 0.79                    | 0.51 | 0.10 | 0.39 | 0.04 | 0.00  | 1.08 | 74.42 |
| Mal-8-1EF-02 | Cement                        | 180           | 28.38                  | 1.48 | 0.06 | 42.06 | 0.84 | 0.00 | 0.08 | 0.83                    | 0.36 | 0.05 | 0.32 | 0.00 | 0.04  | 1.15 | 75.65 |
| Mal-8-1EF-03 | Enamel                        | 300           | 39.60                  | 0.15 | 0.04 | 50.27 | 0.29 | 0.00 | 0.00 | 0.69                    | 0.31 | 0.56 | 0.06 | 0.00 | 0.03  | 1.35 | 93.35 |
| Mal-8-1EF-04 | Enamel                        | 420           | 38.65                  | 0.14 | 0.00 | 50.55 | 0.31 | 0.00 | 0.04 | 0.80                    | 0.22 | 0.50 | 0.00 | 0.03 | 0.00  | 1.38 | 92.62 |
| Mal-8-1EF-05 | Enamel                        | 540           | 38.33                  | 0.47 | 0.00 | 49.74 | 0.32 | 0.00 | 0.06 | 0.91                    | 0.16 | 0.48 | 0.08 | 0.04 | 0.00  | 1.41 | 92.00 |
| Mal-8-1EF-06 | Enamel                        | 660           | 38.96                  | 0.64 | 0.00 | 50.33 | 0.40 | 0.00 | 0.04 | 0.77                    | 0.18 | 0.56 | 0.05 | 0.02 | 0.00  | 1.40 | 93.35 |
| Mal-8-1EF-07 | Enamel                        | 780           | 39.07                  | 0.94 | 0.00 | 50.57 | 0.37 | 0.00 | 0.08 | 0.77                    | 0.22 | 0.55 | 0.06 | 0.02 | 0.00  | 1.40 | 94.05 |
| Mal-8-1EF-08 | Enamel                        | 900           | 38.80                  | 0.11 | 0.00 | 50.20 | 0.41 | 0.00 | 0.04 | 0.91                    | 0.20 | 0.43 | 0.05 | 0.04 | 0.00  | 1.41 | 92.61 |
| Mal-8-1EF-09 | Enamel                        | 1020          | 38.08                  | 0.36 | 0.00 | 50.14 | 0.36 | 0.00 | 0.06 | 1.05                    | 0.24 | 0.41 | 0.08 | 0.02 | 0.00  | 1.39 | 92.20 |
| Mal-8-1EF-10 | Enamel                        | 1140          | 37.87                  | 0.24 | 0.23 | 50.37 | 0.38 | 0.00 | 0.07 | 1.03                    | 0.20 | 0.36 | 0.00 | 0.00 | 0.04  | 1.41 | 92.20 |
| Mal-8-1EF-11 | Enamel                        | 1260          | 38.86                  | 0.13 | 0.07 | 50.46 | 0.40 | 0.00 | 0.06 | 1.05                    | 0.20 | 0.36 | 0.05 | 0.03 | 0.00  | 1.43 | 93.10 |
| Mal-8-1EF-12 | Enamel                        | 1380          | 38.34                  | 0.16 | 0.00 | 50.10 | 0.38 | 0.00 | 0.09 | 1.02                    | 0.21 | 0.34 | 0.00 | 0.02 | 0.00  | 1.42 | 92.07 |
| Mal-8-1EF-13 | Enamel                        | 1500          | 38.13                  | 0.99 | 0.00 | 49.77 | 0.38 | 0.00 | 0.06 | 1.08                    | 0.25 | 0.32 | 0.08 | 0.00 | 0.00  | 1.42 | 92.48 |
| Mal-8-1EF-14 | Enamel                        | 1620          | 38.01                  | 0.32 | 0.00 | 50.30 | 0.38 | 0.00 | 0.05 | 1.08                    | 0.22 | 0.32 | 0.05 | 0.00 | 0.00  | 1.42 | 92.15 |
| Mal-8-1EF-15 | Enamel                        | 1740          | 37.38                  | 0.18 | 0.00 | 50.20 | 0.38 | 0.00 | 0.05 | 1.18                    | 0.22 | 0.27 | 0.07 | 0.03 | 0.00  | 1.41 | 91.36 |
| Mal-8-1EF-16 | Enamel                        | 1860          | 36.95                  | 0.38 | 0.04 | 49.74 | 0.41 | 0.00 | 0.05 | 1.21                    | 0.18 | 0.25 | 0.00 | 0.04 | 0.00  | 1.42 | 90.67 |
| Mal-8-1EF-17 | Enamel                        | 1980          | 38.90                  | 0.19 | 0.00 | 50.20 | 0.36 | 0.00 | 0.08 | 1.05                    | 0.20 | 0.23 | 0.00 | 0.02 | 0.00  | 1.46 | 92.70 |
| Mal-8-1EF-18 | Enamel                        | 2100          | 36.73                  | 0.28 | 0.00 | 48.88 | 0.40 | 0.00 | 0.06 | 1.21                    | 0.18 | 0.20 | 0.06 | 0.03 | 0.00  | 1.42 | 89.42 |
| Mal-8-1EF-19 | Enamel                        | 2220          | 37.22                  | 0.30 | 0.00 | 49.58 | 0.36 | 0.00 | 0.07 | 1.17                    | 0.17 | 0.19 | 0.08 | 0.03 | 0.00  | 1.44 | 90.61 |
| Mal-8-1EF-20 | Enamel                        | 2340          | 37.42                  | 1.00 | 0.00 | 49.12 | 0.40 | 0.00 | 0.06 | 1.31                    | 0.16 | 0.16 | 0.00 | 0.04 | 0.00  | 1.47 | 91.15 |
| Mal-8-1EF-21 | Enamel                        | 2460          | 36.13                  | 0.18 | 0.05 | 48.84 | 0.43 | 0.00 | 0.07 | 1.29                    | 0.19 | 0.14 | 0.05 | 0.03 | 0.00  | 1.41 | 88.81 |
| Mal-8-1EF-22 | Enamel                        | 2580          | 37.36                  | 0.19 | 0.00 | 48.93 | 0.39 | 0.00 | 0.09 | 1.38                    | 0.21 | 0.13 | 0.06 | 0.04 | 0.00  | 1.44 | 90.21 |
| Mal-8-1EF-23 | Dentin                        | 2700          | 27.30                  | 4.20 | 0.00 | 37.64 | 1.66 | 0.00 | 0.09 | 1.01                    | 0.32 | 0.08 | 0.30 | 0.00 | 0.00  | 1.16 | 73.75 |
| Mal-8-1EF-24 | Dentin                        | 2820          | 28.17                  | 1.95 | 0.05 | 39.08 | 1.82 | 0.00 | 0.07 | 1.05                    | 0.28 | 0.07 | 0.26 | 0.03 | 0.00  | 1.16 | 74.01 |
| Mal-8-1EF-25 | Dentin                        | 2940          | 28.63                  | 0.66 | 0.05 | 39.75 | 2.14 | 0.00 | 0.06 | 1.10                    | 0.26 | 0.04 | 0.27 | 0.02 | 0.03  | 1.17 | 74.19 |
| Mal-8-1EF-26 | Dentin                        | 3060          | 28.05                  | 1.25 | 0.00 | 39.51 | 2.15 | 0.00 | 0.04 | 1.02                    | 0.28 | 0.05 | 0.29 | 0.02 | 0.00  | 1.16 | 73.81 |
| Mal-8-1EF-27 | Dentin                        | 3180          | 27.56                  | 4.09 | 0.08 | 39.23 | 2.30 | 0.00 | 0.08 | 1.00                    | 0.27 | 0.06 | 0.28 | 0.00 | 0.04  | 1.21 | 76.19 |
| Mal-8-1EF-28 | Dentin                        | 3300          | 28.46                  | 3.83 | 0.00 | 39.12 | 2.42 | 0.00 | 0.07 | 1.13                    | 0.24 | 0.06 | 0.25 | 0.00 | 0.03  | 1.23 | 76.85 |
| Mal-8-1EF-29 | Dentin                        | 3420          | 29.19                  | 2.88 | 0.00 | 39.27 | 2.10 | 0.00 | 0.07 | 1.10                    | 0.38 | 0.04 | 0.25 | 0.03 | 0.00  | 1.19 | 76.49 |
| Mal-8-1EF-30 | Dentin                        | 3540          | 29.20                  | 2.84 | 0.00 | 40.12 | 2.06 | 0.00 | 0.06 | 1.03                    | 0.39 | 0.06 | 0.27 | 0.00 | 0.06  | 1.18 | 77.27 |

| Mal-8      | <i>Hippopotamus amphibius</i> | Molar M3      | Lake Malawi, Senga Bay |      |      |       |      |      |      | Buy, Safari Beach Lodge |      |      |      |      |       |      |       |
|------------|-------------------------------|---------------|------------------------|------|------|-------|------|------|------|-------------------------|------|------|------|------|-------|------|-------|
| Profile    | Mineral                       | Distance (µm) | P2O5                   | SiO2 | FeO  | CaO   | MgO  | MnO  | SrO  | Na2O                    | F    | Cl   | SO3  | K2O  | Al2O3 | H2O  | Total |
| Mal-8 L-01 | Enamel                        | 100           | 37.72                  | 0.06 | 0.00 | 49.59 | 0.54 | 0.00 | 0.09 | 1.33                    | 0.21 | 0.22 | 0.09 | 0.05 | 0.00  | 1.43 | 91.33 |
| Mal-8 L-02 | Enamel                        | 600           | 38.13                  | 0.07 | 0.00 | 49.57 | 0.50 | 0.00 | 0.07 | 1.42                    | 0.19 | 0.22 | 0.12 | 0.04 | 0.00  | 1.45 | 91.77 |
| Mal-8 L-03 | Enamel                        | 1100          | 38.24                  | 0.04 | 0.00 | 49.20 | 0.53 | 0.00 | 0.08 | 1.36                    | 0.20 | 0.21 | 0.18 | 0.06 | 0.00  | 1.44 | 91.53 |
| Mal-8 L-04 | Enamel                        | 1600          | 37.81                  | 0.07 | 0.00 | 49.59 | 0.51 | 0.00 | 0.08 | 1.39                    | 0.22 | 0.21 | 0.13 | 0.05 | 0.00  | 1.43 | 91.49 |
| Mal-8 L-05 | Enamel                        | 2100          | 37.58                  | 0.08 | 0.07 | 49.26 | 0.51 | 0.00 | 0.06 | 1.37                    | 0.19 | 0.22 | 0.13 | 0.05 | 0.00  | 1.43 | 90.95 |
| Mal-8 L-06 | Enamel                        | 2600          | 38.29                  | 0.07 | 0.04 | 49.76 | 0.47 | 0.00 | 0.08 | 1.36                    | 0.20 | 0.22 | 0.20 | 0.04 | 0.00  | 1.45 | 92.18 |
| Mal-8 L-07 | Enamel                        | 3100          | 38.75                  | 0.06 | 0.00 | 50.04 | 0.49 | 0.00 | 0.09 | 1.42                    | 0.20 | 0.23 | 0.10 | 0.03 | 0.00  | 1.46 | 92.88 |
| Mal-8 L-08 | Enamel                        | 3600          | 37.54                  | 0.04 | 0.00 | 50.34 | 0.46 | 0.00 | 0.07 | 1.25                    | 0.21 | 0.23 | 0.10 | 0.04 | 0.00  | 1.43 | 91.71 |
| Mal-8 L-09 | Enamel                        | 4100          | 38.07                  | 0.07 | 0.00 | 49.95 | 0.44 | 0.00 | 0.08 | 1.20                    | 0.20 | 0.23 | 0.10 | 0.04 | 0.00  | 1.44 | 91.81 |
| Mal-8 L-10 | Enamel                        | 4600          | 37.55                  | 0.05 | 0.04 | 49.92 | 0.47 | 0.00 | 0.08 | 1.32                    | 0.23 | 0.26 | 0.10 | 0.04 | 0.00  | 1.41 | 91.46 |
| Mal-8 L-11 | Enamel                        | 5100          | 37.77                  | 0.11 | 0.00 | 49.92 | 0.41 | 0.00 | 0.08 | 1.19                    | 0.21 | 0.25 | 0.12 | 0.03 | 0.00  | 1.42 | 91.51 |
| Mal-8 L-12 | Enamel                        | 5600          | 37.86                  | 0.20 | 0.03 | 49.87 | 0.37 | 0.00 | 0.07 | 1.08                    | 0.20 | 0.24 | 0.06 | 0.03 | 0.00  | 1.43 | 91.46 |
| Mal-8 L-13 | Enamel                        | 6100          | 37.16                  | 0.22 | 0.00 | 49.45 | 0.38 | 0.00 | 0.06 | 1.15                    | 0.24 | 0.23 | 0.05 | 0.03 | 0.03  | 1.40 | 90.41 |
| Mal-8 L-14 | Enamel                        | 6600          | 37.07                  | 0.24 | 0.00 | 49.42 | 0.38 | 0.00 | 0.07 | 1.15                    | 0.23 | 0.25 | 0.00 | 0.05 | 0.00  | 1.39 | 90.25 |
| Mal-8 L-15 | Enamel                        | 7100          | 36.36                  | 0.18 | 0.00 | 48.83 | 0.43 | 0.00 | 0.07 | 1.34                    | 0.20 | 0.22 | 0.07 | 0.05 | 0.00  | 1.40 | 89.13 |
| Mal-8 L-16 | Enamel                        | 7600          | 37.17                  | 0.54 | 0.00 | 49.95 | 0.46 | 0.00 | 0.07 | 1.23                    | 0.20 | 0.23 | 0.07 | 0.03 | 0.00  | 1.43 | 91.38 |
| Mal-8 L-17 | Enamel                        | 8100          | 36.45                  | 0.39 | 0.00 | 48.52 | 0.39 | 0.07 | 0.07 | 1.19                    | 0.27 | 0.22 | 0.07 | 0.02 | 0.00  | 1.37 | 89.03 |
| Mal-8 L-18 | Enamel                        | 8600          | 36.56                  | 2.16 | 0.00 | 47.67 | 0.43 | 0.00 | 0.07 | 1.30                    | 0.18 | 0.20 | 0.10 | 0.03 | 0.00  | 1.44 | 90.15 |
| Mal-8 L-19 | Enamel                        | 9100          | 37.51                  | 0.24 | 0.04 | 49.87 | 0.49 | 0.00 | 0.07 | 1.20                    | 0.20 | 0.21 | 0.06 | 0.04 | 0.00  | 1.43 | 91.36 |
| Mal-8 L-20 | Enamel                        | 9600          | 35.27                  | 1.17 | 0.00 | 48.87 | 0.43 | 0.00 | 0.08 | 1.25                    | 0.23 | 0.22 | 0.05 | 0.06 | 0.00  | 1.38 | 89.01 |
| Mal-8 L-21 | Enamel                        | 10100         | 36.33                  | 0.55 | 0.05 | 48.74 | 0.45 | 0.00 | 0.08 | 1.25                    | 0.20 | 0.17 | 0.09 | 0.05 | 0.00  | 1.41 | 89.37 |
| Mal-8 L-22 | Enamel                        | 10600         | 38.18                  | 0.31 | 0.04 | 49.87 | 0.44 | 0.00 | 0.07 | 1.19                    | 0.22 | 0.20 | 0.07 | 0.02 | 0.00  | 1.44 | 92.05 |
| Mal-8 L-23 | Enamel                        | 11100         | 36.31                  | 0.30 | 0.00 | 48.91 | 0.39 | 0.00 | 0.09 | 1.21                    | 0.21 | 0.18 | 0.06 | 0.03 | 0.00  | 1.40 | 89.10 |
| Mal-8 L-24 | Enamel                        | 11600         | 36.16                  | 0.68 | 0.00 | 48.78 | 0.38 | 0.00 | 0.07 | 1.12                    | 0.25 | 0.19 | 0.00 | 0.06 | 0.00  | 1.38 | 89.07 |
| Mal-8 L-25 | Enamel                        | 12100         | 37.10                  | 0.16 | 0.00 | 48.96 | 0.41 | 0.00 | 0.07 | 1.17                    | 0.19 | 0.18 | 0.08 | 0.04 | 0.00  | 1.42 | 89.77 |
| Mal-8 L-26 | Enamel                        | 12600         | 37.99                  | 0.46 | 0.04 | 49.90 | 0.41 | 0.00 | 0.07 | 1.14                    | 0.21 | 0.21 | 0.00 | 0.03 | 0.00  | 1.44 | 91.91 |
| Mal-8 L-27 | Enamel                        | 13100         | 36.27                  | 2.02 | 0.00 | 48.50 | 0.42 | 0.00 | 0.09 | 1.27                    | 0.23 | 0.20 | 0.08 | 0.04 | 0.00  | 1.42 | 90.53 |
| Mal-8 L-28 | Enamel                        | 13600         | 36.10                  | 0.50 | 0.00 | 48.45 | 0.46 | 0.00 | 0.07 | 1.28                    | 0.21 | 0.18 | 0.09 | 0.04 | 0.00  | 1.39 | 88.78 |
| Mal-8 L-29 | Enamel                        | 14100         | 36.31                  | 1.41 | 0.00 | 48.80 | 0.39 | 0.00 | 0.10 | 1.21                    | 0.23 | 0.19 | 0.07 | 0.02 | 0.04  | 1.41 | 90.18 |
| Mal-8 L-30 | Enamel                        | 14600         | 37.54                  | 0.33 | 0.00 | 50.24 | 0.41 | 0.00 | 0.08 | 1.20                    | 0.22 | 0.21 | 0.07 | 0.05 | 0.00  | 1.43 | 91.77 |

| Mal-8      | <i>Hippopotamus amphibius</i> | Molar M3                      | Lake Malawi, Senga Bay |      |      |       |      |      |      | Buy, Safari Beach Lodge |      |      |      |      |       |      |       |
|------------|-------------------------------|-------------------------------|------------------------|------|------|-------|------|------|------|-------------------------|------|------|------|------|-------|------|-------|
| Profile    | Mineral                       | Distance<br>( $\mu\text{m}$ ) | P2O5                   | SiO2 | FeO  | CaO   | MgO  | MnO  | SrO  | Na2O                    | F    | Cl   | SO3  | K2O  | Al2O3 | H2O  | Total |
| Mal-8 L-31 | Enamel                        | 15100                         | 36.33                  | 0.71 | 0.00 | 49.28 | 0.38 | 0.00 | 0.08 | 1.27                    | 0.18 | 0.19 | 0.07 | 0.05 | 0.00  | 1.42 | 89.97 |
| Mal-8 L-32 | Enamel                        | 15600                         | 37.04                  | 1.64 | 0.00 | 49.27 | 0.43 | 0.00 | 0.07 | 1.23                    | 0.23 | 0.18 | 0.06 | 0.04 | 0.00  | 1.44 | 91.63 |
| Mal-8 L-33 | Enamel                        | 16100                         | 37.99                  | 0.21 | 0.04 | 49.97 | 0.42 | 0.00 | 0.07 | 1.22                    | 0.19 | 0.21 | 0.07 | 0.06 | 0.00  | 1.45 | 91.90 |
| Mal-8 L-34 | Enamel                        | 16600                         | 35.93                  | 1.56 | 0.00 | 49.02 | 0.40 | 0.00 | 0.07 | 1.19                    | 0.21 | 0.19 | 0.05 | 0.03 | 0.00  | 1.41 | 90.06 |
| Mal-8 L-35 | Enamel                        | 17100                         | 37.23                  | 1.88 | 0.00 | 48.78 | 0.45 | 0.00 | 0.06 | 1.21                    | 0.20 | 0.19 | 0.07 | 0.03 | 0.00  | 1.45 | 91.54 |
| Mal-8 L-36 | Enamel                        | 17600                         | 36.74                  | 1.04 | 0.00 | 49.49 | 0.43 | 0.00 | 0.07 | 1.16                    | 0.21 | 0.19 | 0.10 | 0.06 | 0.00  | 1.43 | 90.90 |
| Mal-8 L-37 | Enamel                        | 18100                         | 37.83                  | 0.56 | 0.06 | 49.48 | 0.45 | 0.00 | 0.05 | 1.19                    | 0.23 | 0.20 | 0.06 | 0.03 | 0.00  | 1.43 | 91.58 |
| Mal-8 L-38 | Enamel                        | 18600                         | 36.16                  | 0.67 | 0.05 | 49.11 | 0.36 | 0.00 | 0.07 | 1.22                    | 0.22 | 0.19 | 0.08 | 0.03 | 0.00  | 1.40 | 89.55 |
| Mal-8 L-39 | Enamel                        | 19100                         | 37.49                  | 0.21 | 0.00 | 50.02 | 0.41 | 0.00 | 0.09 | 1.09                    | 0.21 | 0.23 | 0.06 | 0.00 | 0.00  | 1.42 | 91.24 |
| Mal-8 L-40 | Enamel                        | 19600                         | 36.11                  | 0.18 | 0.06 | 48.31 | 0.41 | 0.00 | 0.07 | 1.24                    | 0.18 | 0.19 | 0.00 | 0.04 | 0.00  | 1.39 | 88.18 |
| Mal-8 L-41 | Enamel                        | 20100                         | 38.32                  | 0.34 | 0.00 | 49.90 | 0.40 | 0.00 | 0.10 | 1.26                    | 0.22 | 0.19 | 0.06 | 0.03 | 0.00  | 1.45 | 92.28 |

| Nile-1     |         | <i>Hippopotamus amphibius</i> |       | Molar M3 |      | Sudan Upper Nile |      |      |      | 21004 |      | Naturhistorisches Museum, Vienna |      |      |       |       |
|------------|---------|-------------------------------|-------|----------|------|------------------|------|------|------|-------|------|----------------------------------|------|------|-------|-------|
| Comment    | Mineral | Distance (µm)                 | P2O5  | SiO2     | FeO  | CaO              | MgO  | MnO  | SrO  | Na2O  | F    | Cl                               | SO3  | K2O  | Al2O3 | Total |
| NIL1 AB-01 | Dentin  | 40                            | 29.73 | 0.00     | 0.00 | 43.69            | 2.17 | 0.01 | 0.03 | 1.06  | 0.14 | 0.05                             | 0.33 | 0.03 | 0.01  | 77.25 |
| NIL1 AB-02 | Dentin  | 80                            | 29.41 | 0.02     | 0.04 | 43.44            | 2.47 | 0.00 | 0.03 | 1.05  | 0.17 | 0.05                             | 0.27 | 0.01 | 0.03  | 76.99 |
| NIL1 AB-03 | Dentin  | 160                           | 30.18 | 0.04     | 0.00 | 43.60            | 2.56 | 0.02 | 0.03 | 1.01  | 0.10 | 0.05                             | 0.33 | 0.02 | 0.08  | 78.01 |
| NIL1 AB-04 | Dentin  | 240                           | 28.89 | 0.01     | 0.00 | 43.66            | 2.41 | 0.01 | 0.01 | 0.87  | 0.15 | 0.06                             | 0.23 | 0.02 | 0.15  | 76.48 |
| NIL1 AB-05 | Dentin  | 320                           | 29.39 | 0.01     | 0.05 | 44.14            | 2.49 | 0.00 | 0.05 | 0.94  | 0.12 | 0.07                             | 0.24 | 0.01 | 0.05  | 77.56 |
| NIL1 AB-06 | Dentin  | 400                           | 29.81 | 0.01     | 0.00 | 44.94            | 2.44 | 0.01 | 0.02 | 0.87  | 0.17 | 0.10                             | 0.27 | 0.03 | 0.01  | 78.66 |
| NIL1 AB-07 | Enamel  | 480                           | 38.74 | 0.01     | 0.01 | 49.86            | 0.36 | 0.03 | 0.04 | 1.38  | 0.07 | 0.17                             | 0.05 | 0.03 | 0.00  | 90.74 |
| NIL1 AB-08 | Enamel  | 560                           | 38.48 | 0.00     | 0.08 | 49.77            | 0.35 | 0.00 | 0.04 | 1.30  | 0.11 | 0.19                             | 0.02 | 0.03 | 0.01  | 90.36 |
| NIL1 AB-09 | Enamel  | 640                           | 38.38 | 0.02     | 0.05 | 49.81            | 0.35 | 0.00 | 0.03 | 1.34  | 0.09 | 0.20                             | 0.01 | 0.05 | 0.00  | 90.32 |
| NIL1 AB-10 | Enamel  | 720                           | 38.87 | 0.02     | 0.02 | 50.10            | 0.34 | 0.02 | 0.03 | 1.43  | 0.09 | 0.22                             | 0.02 | 0.05 | 0.01  | 91.21 |
| NIL1 AB-11 | Enamel  | 800                           | 38.89 | 0.00     | 0.00 | 50.30            | 0.34 | 0.00 | 0.06 | 1.23  | 0.11 | 0.25                             | 0.00 | 0.03 | 0.01  | 91.22 |
| NIL1 AB-12 | Enamel  | 880                           | 38.96 | 0.02     | 0.00 | 50.16            | 0.29 | 0.00 | 0.03 | 1.31  | 0.08 | 0.29                             | 0.02 | 0.03 | 0.00  | 91.18 |
| NIL1 AB-13 | Enamel  | 960                           | 38.94 | 0.02     | 0.01 | 50.59            | 0.29 | 0.00 | 0.05 | 1.33  | 0.07 | 0.29                             | 0.01 | 0.04 | 0.01  | 91.65 |
| NIL1 AB-14 | Enamel  | 1040                          | 39.39 | 0.00     | 0.00 | 50.55            | 0.28 | 0.01 | 0.02 | 1.18  | 0.08 | 0.32                             | 0.02 | 0.02 | 0.00  | 91.87 |
| NIL1 AB-15 | Enamel  | 1120                          | 39.72 | 0.02     | 0.06 | 50.69            | 0.30 | 0.01 | 0.04 | 1.18  | 0.12 | 0.33                             | 0.03 | 0.06 | 0.00  | 92.55 |
| NIL1 AB-16 | Enamel  | 1200                          | 39.21 | 0.01     | 0.03 | 50.49            | 0.27 | 0.00 | 0.03 | 1.22  | 0.14 | 0.35                             | 0.01 | 0.03 | 0.00  | 91.79 |
| NIL1 AB-17 | Enamel  | 1280                          | 39.58 | 0.00     | 0.04 | 50.64            | 0.27 | 0.00 | 0.04 | 1.05  | 0.10 | 0.34                             | 0.03 | 0.05 | 0.02  | 92.16 |
| NIL1 AB-18 | Enamel  | 1360                          | 39.61 | 0.03     | 0.01 | 51.12            | 0.24 | 0.00 | 0.01 | 1.09  | 0.10 | 0.39                             | 0.02 | 0.01 | 0.00  | 92.64 |
| NIL1 AB-19 | Enamel  | 1440                          | 39.53 | 0.02     | 0.05 | 50.69            | 0.22 | 0.01 | 0.05 | 1.10  | 0.10 | 0.41                             | 0.02 | 0.05 | 0.00  | 92.24 |
| NIL1 AB-20 | Enamel  | 1520                          | 39.18 | 0.00     | 0.00 | 50.77            | 0.23 | 0.00 | 0.05 | 0.98  | 0.10 | 0.40                             | 0.05 | 0.04 | 0.02  | 91.81 |
| NIL1 AB-21 | Enamel  | 1600                          | 39.44 | 0.00     | 0.03 | 51.35            | 0.20 | 0.00 | 0.03 | 1.04  | 0.08 | 0.42                             | 0.03 | 0.03 | 0.02  | 92.67 |
| NIL1 AB-22 | Enamel  | 1680                          | 39.66 | 0.03     | 0.01 | 51.45            | 0.22 | 0.00 | 0.02 | 0.97  | 0.11 | 0.46                             | 0.01 | 0.03 | 0.00  | 92.97 |
| NIL1 AB-23 | Enamel  | 1760                          | 39.57 | 0.00     | 0.04 | 51.60            | 0.23 | 0.02 | 0.02 | 0.98  | 0.13 | 0.47                             | 0.03 | 0.02 | 0.02  | 93.13 |
| NIL1 AB-24 | Enamel  | 1840                          | 39.88 | 0.01     | 0.01 | 51.19            | 0.21 | 0.00 | 0.03 | 0.92  | 0.08 | 0.49                             | 0.03 | 0.04 | 0.00  | 92.88 |
| NIL1 AB-25 | Enamel  | 1920                          | 39.73 | 0.00     | 0.00 | 51.17            | 0.17 | 0.01 | 0.01 | 0.91  | 0.13 | 0.51                             | 0.04 | 0.03 | 0.00  | 92.71 |
| NIL1 AB-26 | Enamel  | 2000                          | 39.81 | 0.00     | 0.05 | 51.13            | 0.19 | 0.01 | 0.05 | 0.86  | 0.09 | 0.53                             | 0.03 | 0.03 | 0.00  | 92.76 |
| NIL1 AB-27 | Enamel  | 2080                          | 39.53 | 0.00     | 0.00 | 50.99            | 0.19 | 0.01 | 0.03 | 0.96  | 0.08 | 0.52                             | 0.05 | 0.02 | 0.00  | 92.38 |
| NIL1 AB-28 | Enamel  | 2160                          | 39.99 | 0.00     | 0.06 | 51.30            | 0.19 | 0.00 | 0.01 | 0.86  | 0.11 | 0.56                             | 0.02 | 0.02 | 0.00  | 93.13 |
| NIL1 AB-29 | Enamel  | 2240                          | 39.90 | 0.00     | 0.07 | 51.30            | 0.18 | 0.00 | 0.03 | 0.83  | 0.15 | 0.56                             | 0.04 | 0.04 | 0.00  | 93.09 |
| NIL1 AB-30 | Enamel  | 2320                          | 39.91 | 0.01     | 0.03 | 50.97            | 0.21 | 0.00 | 0.02 | 0.71  | 0.06 | 0.56                             | 0.02 | 0.01 | 0.02  | 92.53 |
| NIL1 AB-31 | Enamel  | 2400                          | 40.35 | 0.03     | 0.00 | 51.18            | 0.18 | 0.00 | 0.00 | 0.72  | 0.17 | 0.56                             | 0.03 | 0.03 | 0.00  | 93.25 |

| Nile-2     |         | <i>Hippopotamus amphibius</i> |       | Molar M3 |      | Sudan Upper Nile |      |      |      | 21004 Naturhistorisches Museum, Vienna |      |      |      |      |       |       |
|------------|---------|-------------------------------|-------|----------|------|------------------|------|------|------|----------------------------------------|------|------|------|------|-------|-------|
| Comment    | Mineral | Distance<br>( $\mu\text{m}$ ) | P2O5  | SiO2     | FeO  | CaO              | MgO  | MnO  | SrO  | Na2O                                   | F    | Cl   | SO3  | K2O  | Al2O3 | Total |
| NIL2 AB-01 | Enamel  | 40                            | 38.64 | 0.00     | 0.03 | 49.75            | 0.36 | 0.01 | 0.08 | 1.13                                   | 0.10 | 0.24 | 0.01 | 0.03 | 0.01  | 90.38 |
| NIL2 AB-02 | Enamel  | 80                            | 39.23 | 0.00     | 0.08 | 49.94            | 0.36 | 0.00 | 0.04 | 1.09                                   | 0.04 | 0.24 | 0.02 | 0.03 | 0.01  | 91.08 |
| NIL2 AB-03 | Enamel  | 160                           | 38.58 | 0.03     | 0.00 | 49.72            | 0.32 | 0.00 | 0.03 | 1.12                                   | 0.14 | 0.26 | 0.00 | 0.03 | 0.00  | 90.23 |
| NIL2 AB-04 | Enamel  | 240                           | 39.10 | 0.00     | 0.02 | 50.26            | 0.32 | 0.00 | 0.05 | 1.08                                   | 0.17 | 0.27 | 0.01 | 0.05 | 0.00  | 91.34 |
| NIL2 AB-05 | Enamel  | 320                           | 39.21 | 0.00     | 0.01 | 49.80            | 0.32 | 0.03 | 0.05 | 1.14                                   | 0.13 | 0.27 | 0.04 | 0.04 | 0.00  | 91.04 |
| NIL2 AB-06 | Enamel  | 400                           | 39.60 | 0.00     | 0.00 | 50.01            | 0.31 | 0.02 | 0.05 | 1.08                                   | 0.11 | 0.30 | 0.02 | 0.03 | 0.00  | 91.53 |
| NIL2 AB-07 | Enamel  | 480                           | 39.12 | 0.01     | 0.02 | 50.22            | 0.32 | 0.01 | 0.07 | 0.98                                   | 0.10 | 0.31 | 0.04 | 0.03 | 0.00  | 91.22 |
| NIL2 AB-08 | Enamel  | 560                           | 39.86 | 0.03     | 0.00 | 50.65            | 0.31 | 0.05 | 0.05 | 1.04                                   | 0.14 | 0.31 | 0.01 | 0.00 | 0.00  | 92.44 |
| NIL2 AB-09 | Enamel  | 640                           | 39.56 | 0.01     | 0.00 | 50.33            | 0.30 | 0.00 | 0.04 | 0.92                                   | 0.12 | 0.34 | 0.02 | 0.04 | 0.00  | 91.69 |
| NIL2 AB-10 | Enamel  | 720                           | 39.36 | 0.00     | 0.05 | 50.51            | 0.28 | 0.02 | 0.05 | 1.06                                   | 0.08 | 0.32 | 0.02 | 0.05 | 0.00  | 91.80 |
| NIL2 AB-11 | Enamel  | 800                           | 38.93 | 0.00     | 0.00 | 50.56            | 0.30 | 0.04 | 0.04 | 0.97                                   | 0.13 | 0.35 | 0.01 | 0.04 | 0.01  | 91.38 |
| NIL2 AB-12 | Enamel  | 880                           | 39.71 | 0.02     | 0.00 | 50.97            | 0.30 | 0.00 | 0.04 | 0.97                                   | 0.10 | 0.36 | 0.02 | 0.03 | 0.00  | 92.52 |
| NIL2 AB-13 | Enamel  | 960                           | 38.90 | 0.00     | 0.04 | 50.40            | 0.31 | 0.01 | 0.05 | 0.92                                   | 0.08 | 0.36 | 0.04 | 0.03 | 0.01  | 91.14 |
| NIL2 AB-14 | Enamel  | 1040                          | 38.97 | 0.02     | 0.07 | 50.88            | 0.30 | 0.01 | 0.04 | 0.91                                   | 0.16 | 0.38 | 0.01 | 0.02 | 0.02  | 91.78 |
| NIL2 AB-15 | Enamel  | 1120                          | 39.01 | 0.19     | 0.15 | 50.19            | 0.43 | 0.01 | 0.05 | 0.92                                   | 0.15 | 0.38 | 0.04 | 0.03 | 0.10  | 91.65 |
| NIL2 AB-16 | Enamel  | 1200                          | 38.97 | 0.00     | 0.05 | 50.69            | 0.28 | 0.03 | 0.06 | 0.92                                   | 0.10 | 0.39 | 0.02 | 0.01 | 0.03  | 91.55 |
| NIL2 AB-17 | Enamel  | 1280                          | 39.65 | 0.01     | 0.00 | 50.56            | 0.31 | 0.00 | 0.03 | 0.85                                   | 0.12 | 0.39 | 0.00 | 0.03 | 0.01  | 91.97 |
| NIL2 AB-18 | Enamel  | 1360                          | 38.67 | 0.02     | 0.00 | 49.88            | 0.26 | 0.04 | 0.03 | 0.84                                   | 0.15 | 0.42 | 0.02 | 0.03 | 0.00  | 90.36 |
| NIL2 AB-19 | Enamel  | 1440                          | 39.54 | 0.01     | 0.05 | 49.95            | 0.28 | 0.01 | 0.04 | 0.78                                   | 0.11 | 0.42 | 0.01 | 0.05 | 0.02  | 91.27 |
| NIL2 AB-20 | Enamel  | 1520                          | 38.99 | 0.01     | 0.00 | 49.97            | 0.28 | 0.01 | 0.05 | 0.88                                   | 0.11 | 0.42 | 0.04 | 0.02 | 0.00  | 90.77 |
| NIL2 AB-21 | Enamel  | 1600                          | 39.49 | 0.01     | 0.02 | 50.46            | 0.27 | 0.00 | 0.04 | 0.83                                   | 0.09 | 0.45 | 0.03 | 0.03 | 0.00  | 91.72 |
| NIL2 AB-22 | Enamel  | 1680                          | 39.10 | 0.00     | 0.02 | 50.04            | 0.24 | 0.00 | 0.05 | 0.84                                   | 0.11 | 0.46 | 0.05 | 0.03 | 0.00  | 90.94 |
| NIL2 AB-23 | Enamel  | 1760                          | 39.36 | 0.01     | 0.02 | 49.94            | 0.25 | 0.01 | 0.05 | 0.88                                   | 0.09 | 0.47 | 0.03 | 0.00 | 0.00  | 91.11 |
| NIL2 AB-24 | Enamel  | 1840                          | 39.04 | 0.02     | 0.00 | 50.26            | 0.22 | 0.03 | 0.02 | 0.85                                   | 0.07 | 0.49 | 0.01 | 0.01 | 0.01  | 91.03 |
| NIL2 AB-25 | Enamel  | 1920                          | 39.77 | 0.01     | 0.07 | 50.23            | 0.21 | 0.02 | 0.04 | 0.89                                   | 0.08 | 0.48 | 0.02 | 0.04 | 0.00  | 91.85 |

| Nile-3     |         | <i>Hippopotamus amphibius</i> |       | Molar M3 |      | Blue Nile |      |      |      | 5576 | Naturhistorisches Museum, Vienna |      |      |      |       |       |
|------------|---------|-------------------------------|-------|----------|------|-----------|------|------|------|------|----------------------------------|------|------|------|-------|-------|
| Comment    | Mineral | Distance<br>( $\mu\text{m}$ ) | P2O5  | SiO2     | FeO  | CaO       | MgO  | MnO  | SrO  | Na2O | F                                | Cl   | SO3  | K2O  | Al2O3 | Total |
| NIL3 AB-01 | Enamel  | 50                            | 37.53 | 0.03     | 0.02 | 49.04     | 0.43 | 0.00 | 0.08 | 1.49 | 0.10                             | 0.14 | 0.03 | 0.04 | 0.02  | 88.95 |
| NIL3 AB-02 | Enamel  | 100                           | 37.98 | 0.02     | 0.02 | 48.36     | 0.49 | 0.00 | 0.08 | 1.42 | 0.14                             | 0.16 | 0.03 | 0.06 | 0.01  | 88.77 |
| NIL3 AB-03 | Enamel  | 200                           | 37.86 | 0.00     | 0.00 | 48.86     | 0.45 | 0.00 | 0.08 | 1.34 | 0.12                             | 0.16 | 0.02 | 0.04 | 0.00  | 88.94 |
| NIL3 AB-04 | Enamel  | 300                           | 37.98 | 0.02     | 0.01 | 48.86     | 0.45 | 0.00 | 0.06 | 1.44 | 0.14                             | 0.17 | 0.01 | 0.06 | 0.00  | 89.19 |
| NIL3 AB-05 | Enamel  | 400                           | 38.05 | 0.01     | 0.04 | 49.03     | 0.50 | 0.00 | 0.06 | 1.35 | 0.11                             | 0.20 | 0.04 | 0.03 | 0.00  | 89.43 |
| NIL3 AB-06 | Enamel  | 500                           | 38.61 | 0.04     | 0.00 | 49.73     | 0.48 | 0.06 | 0.08 | 1.34 | 0.13                             | 0.21 | 0.01 | 0.05 | 0.01  | 90.74 |
| NIL3 AB-07 | Enamel  | 600                           | 38.56 | 0.02     | 0.05 | 50.00     | 0.43 | 0.00 | 0.08 | 1.28 | 0.06                             | 0.22 | 0.02 | 0.05 | 0.00  | 90.77 |
| NIL3 AB-08 | Enamel  | 700                           | 38.15 | 0.00     | 0.05 | 50.20     | 0.44 | 0.01 | 0.06 | 1.22 | 0.14                             | 0.24 | 0.06 | 0.03 | 0.00  | 90.59 |
| NIL3 AB-09 | Enamel  | 800                           | 38.54 | 0.02     | 0.02 | 50.17     | 0.48 | 0.00 | 0.07 | 1.25 | 0.08                             | 0.25 | 0.03 | 0.04 | 0.01  | 90.96 |
| NIL3 AB-10 | Enamel  | 900                           | 38.67 | 0.01     | 0.00 | 50.05     | 0.44 | 0.00 | 0.04 | 1.17 | 0.10                             | 0.25 | 0.03 | 0.05 | 0.00  | 90.81 |
| NIL3 AB-11 | Enamel  | 1000                          | 38.55 | 0.02     | 0.01 | 49.33     | 0.42 | 0.04 | 0.05 | 1.24 | 0.11                             | 0.28 | 0.05 | 0.03 | 0.00  | 90.11 |
| NIL3 AB-12 | Enamel  | 1100                          | 39.08 | 0.00     | 0.05 | 50.15     | 0.46 | 0.03 | 0.08 | 1.24 | 0.09                             | 0.29 | 0.02 | 0.02 | 0.00  | 91.49 |
| NIL3 AB-13 | Enamel  | 1200                          | 38.13 | 0.01     | 0.00 | 50.25     | 0.46 | 0.02 | 0.07 | 1.12 | 0.12                             | 0.27 | 0.04 | 0.04 | 0.01  | 90.54 |
| NIL3 AB-14 | Enamel  | 1300                          | 38.44 | 0.00     | 0.02 | 50.29     | 0.43 | 0.00 | 0.06 | 1.06 | 0.12                             | 0.32 | 0.05 | 0.05 | 0.02  | 90.84 |
| NIL3 AB-15 | Enamel  | 1400                          | 39.16 | 0.00     | 0.04 | 51.03     | 0.38 | 0.00 | 0.05 | 1.18 | 0.08                             | 0.30 | 0.00 | 0.04 | 0.02  | 92.29 |
| NIL3 AB-16 | Enamel  | 1500                          | 39.33 | 0.00     | 0.04 | 50.82     | 0.46 | 0.00 | 0.06 | 1.10 | 0.08                             | 0.32 | 0.06 | 0.05 | 0.00  | 92.32 |
| NIL3 AB-17 | Enamel  | 1600                          | 39.88 | 0.02     | 0.00 | 50.81     | 0.42 | 0.00 | 0.07 | 1.10 | 0.12                             | 0.31 | 0.03 | 0.06 | 0.04  | 92.86 |
| NIL3 AB-18 | Enamel  | 1700                          | 39.27 | 0.00     | 0.03 | 50.77     | 0.42 | 0.00 | 0.08 | 1.10 | 0.10                             | 0.34 | 0.01 | 0.04 | 0.00  | 92.15 |
| NIL3 AB-19 | Enamel  | 1800                          | 39.54 | 0.02     | 0.00 | 51.06     | 0.42 | 0.00 | 0.07 | 1.07 | 0.10                             | 0.38 | 0.02 | 0.04 | 0.00  | 92.73 |
| NIL3 AB-20 | Enamel  | 1900                          | 39.04 | 0.00     | 0.02 | 50.90     | 0.41 | 0.00 | 0.06 | 1.09 | 0.14                             | 0.38 | 0.04 | 0.05 | 0.01  | 92.13 |
| NIL3 AB-21 | Enamel  | 2000                          | 39.43 | 0.03     | 0.00 | 51.15     | 0.40 | 0.00 | 0.08 | 1.14 | 0.10                             | 0.38 | 0.03 | 0.05 | 0.00  | 92.78 |
| NIL3 AB-22 | Enamel  | 2100                          | 39.32 | 0.01     | 0.00 | 50.91     | 0.43 | 0.00 | 0.04 | 1.08 | 0.11                             | 0.38 | 0.04 | 0.04 | 0.00  | 92.35 |
| NIL3 AB-23 | Enamel  | 2200                          | 38.93 | 0.00     | 0.04 | 51.26     | 0.45 | 0.00 | 0.03 | 0.96 | 0.12                             | 0.41 | 0.00 | 0.05 | 0.01  | 92.26 |
| NIL3 AB-24 | Enamel  | 2300                          | 39.89 | 0.01     | 0.00 | 50.86     | 0.43 | 0.02 | 0.05 | 0.95 | 0.09                             | 0.40 | 0.05 | 0.04 | 0.00  | 92.77 |
| NIL3 AB-25 | Enamel  | 2400                          | 39.60 | 0.00     | 0.04 | 50.56     | 0.43 | 0.02 | 0.04 | 1.06 | 0.04                             | 0.42 | 0.03 | 0.01 | 0.00  | 92.26 |
| NIL3 AB-26 | Enamel  | 2500                          | 39.90 | 0.00     | 0.04 | 51.27     | 0.41 | 0.01 | 0.05 | 0.86 | 0.16                             | 0.45 | 0.07 | 0.01 | 0.02  | 93.24 |
| NIL3 AB-27 | Enamel  | 2600                          | 39.90 | 0.03     | 0.02 | 51.23     | 0.39 | 0.00 | 0.06 | 0.94 | 0.09                             | 0.48 | 0.04 | 0.02 | 0.01  | 93.22 |
| NIL3 AB-28 | Enamel  | 2700                          | 39.76 | 0.03     | 0.08 | 51.08     | 0.39 | 0.04 | 0.04 | 0.81 | 0.10                             | 0.52 | 0.03 | 0.01 | 0.01  | 92.89 |
| NIL3 AB-29 | Enamel  | 2800                          | 39.55 | 0.00     | 0.01 | 51.57     | 0.33 | 0.00 | 0.06 | 0.85 | 0.13                             | 0.56 | 0.04 | 0.02 | 0.02  | 93.13 |



| <b>Nile-4</b>  |                | <i>Hippopotamus amphibius</i> |             | Molar M3    |            | White Nile |            |            |            | 4227        | Naturhistorisches Museum, Vienna |           |            |            |              |              |
|----------------|----------------|-------------------------------|-------------|-------------|------------|------------|------------|------------|------------|-------------|----------------------------------|-----------|------------|------------|--------------|--------------|
| <b>Comment</b> | <b>Mineral</b> | <b>Distance<br/>(µm)</b>      | <b>P2O5</b> | <b>SiO2</b> | <b>FeO</b> | <b>CaO</b> | <b>MgO</b> | <b>MnO</b> | <b>SrO</b> | <b>Na2O</b> | <b>F</b>                         | <b>Cl</b> | <b>SO3</b> | <b>K2O</b> | <b>Al2O3</b> | <b>Total</b> |
| NIL4 AB-01     | Enamel         | 50                            | 37.77       | 0.00        | 0.02       | 50.41      | 0.33       | 0.00       | 0.07       | 1.36        | 0.09                             | 0.24      | 0.03       | 0.06       | 0.02         | 90.40        |
| NIL4 AB-02     | Enamel         | 100                           | 38.74       | 0.02        | 0.03       | 50.59      | 0.32       | 0.04       | 0.09       | 1.30        | 0.11                             | 0.25      | 0.01       | 0.03       | 0.00         | 91.55        |
| NIL4 AB-03     | Enamel         | 200                           | 38.72       | 0.01        | 0.03       | 50.93      | 0.31       | 0.00       | 0.04       | 1.27        | 0.12                             | 0.28      | 0.03       | 0.07       | 0.00         | 91.81        |
| NIL4 AB-04     | Enamel         | 300                           | 38.73       | 0.03        | 0.03       | 51.10      | 0.32       | 0.00       | 0.06       | 1.14        | 0.10                             | 0.29      | 0.03       | 0.04       | 0.00         | 91.86        |
| NIL4 AB-05     | Enamel         | 400                           | 38.59       | 0.02        | 0.02       | 51.11      | 0.33       | 0.00       | 0.05       | 1.37        | 0.09                             | 0.27      | 0.05       | 0.05       | 0.01         | 91.95        |
| NIL4 AB-06     | Enamel         | 500                           | 38.93       | 0.00        | 0.00       | 51.38      | 0.31       | 0.01       | 0.02       | 1.30        | 0.15                             | 0.29      | 0.04       | 0.02       | 0.00         | 92.46        |
| NIL4 AB-07     | Enamel         | 600                           | 39.16       | 0.00        | 0.00       | 51.06      | 0.29       | 0.02       | 0.09       | 1.21        | 0.10                             | 0.29      | 0.05       | 0.05       | 0.00         | 92.31        |
| NIL4 AB-08     | Enamel         | 700                           | 39.03       | 0.00        | 0.00       | 51.20      | 0.30       | 0.00       | 0.06       | 1.19        | 0.12                             | 0.31      | 0.04       | 0.05       | 0.01         | 92.31        |
| NIL4 AB-09     | Enamel         | 800                           | 38.85       | 0.00        | 0.02       | 51.50      | 0.33       | 0.00       | 0.08       | 1.18        | 0.12                             | 0.33      | 0.06       | 0.02       | 0.02         | 92.50        |
| NIL4 AB-10     | Enamel         | 900                           | 39.15       | 0.03        | 0.00       | 51.97      | 0.31       | 0.00       | 0.03       | 1.10        | 0.15                             | 0.32      | 0.03       | 0.03       | 0.00         | 93.13        |
| NIL4 AB-11     | Enamel         | 1000                          | 39.23       | 0.00        | 0.00       | 51.59      | 0.32       | 0.00       | 0.08       | 1.08        | 0.12                             | 0.34      | 0.06       | 0.04       | 0.01         | 92.85        |
| NIL4 AB-12     | Enamel         | 1100                          | 38.99       | 0.00        | 0.01       | 52.12      | 0.33       | 0.00       | 0.07       | 1.09        | 0.09                             | 0.35      | 0.05       | 0.02       | 0.00         | 93.11        |
| NIL4 AB-13     | Enamel         | 1200                          | 39.39       | 0.01        | 0.00       | 52.04      | 0.30       | 0.00       | 0.07       | 1.16        | 0.09                             | 0.39      | 0.02       | 0.03       | 0.02         | 93.52        |
| NIL4 AB-14     | Enamel         | 1300                          | 39.34       | 0.00        | 0.01       | 52.44      | 0.30       | 0.00       | 0.08       | 1.07        | 0.09                             | 0.37      | 0.07       | 0.03       | 0.03         | 93.81        |
| NIL4 AB-15     | Enamel         | 1400                          | 39.04       | 0.04        | 0.00       | 52.76      | 0.33       | 0.00       | 0.05       | 1.02        | 0.09                             | 0.41      | 0.05       | 0.04       | 0.01         | 93.84        |
| NIL4 AB-16     | Enamel         | 1500                          | 39.44       | 0.04        | 0.00       | 52.57      | 0.33       | 0.02       | 0.08       | 1.03        | 0.11                             | 0.42      | 0.05       | 0.03       | 0.00         | 94.10        |
| NIL4 AB-17     | Enamel         | 1600                          | 39.61       | 0.01        | 0.00       | 52.81      | 0.29       | 0.00       | 0.06       | 0.98        | 0.14                             | 0.44      | 0.04       | 0.04       | 0.02         | 94.43        |
| NIL4 AB-18     | Enamel         | 1700                          | 39.87       | 0.00        | 0.03       | 52.57      | 0.30       | 0.03       | 0.04       | 0.94        | 0.09                             | 0.45      | 0.05       | 0.04       | 0.00         | 94.41        |
| NIL4 AB-19     | Enamel         | 1800                          | 39.63       | 0.00        | 0.02       | 52.30      | 0.32       | 0.00       | 0.06       | 0.96        | 0.13                             | 0.49      | 0.06       | 0.01       | 0.00         | 93.98        |
| NIL4 AB-20     | Enamel         | 1900                          | 39.31       | 0.00        | 0.07       | 52.29      | 0.26       | 0.00       | 0.07       | 0.94        | 0.09                             | 0.51      | 0.06       | 0.03       | 0.00         | 93.62        |
| NIL4 AB-21     | Enamel         | 2000                          | 39.95       | 0.01        | 0.04       | 52.42      | 0.24       | 0.04       | 0.06       | 0.84        | 0.11                             | 0.54      | 0.03       | 0.04       | 0.00         | 94.30        |
| NIL4 AB-22     | Enamel         | 2100                          | 39.62       | 0.00        | 0.02       | 52.14      | 0.24       | 0.00       | 0.06       | 0.87        | 0.13                             | 0.57      | 0.07       | 0.02       | 0.00         | 93.75        |
| NIL4 AB-23     | Enamel         | 2200                          | 40.04       | 0.03        | 0.00       | 52.31      | 0.29       | 0.00       | 0.04       | 0.84        | 0.10                             | 0.60      | 0.05       | 0.01       | 0.01         | 94.32        |
| NIL4 AB-24     | Enamel         | 2300                          | 39.75       | 0.02        | 0.04       | 52.34      | 0.23       | 0.03       | 0.02       | 0.89        | 0.12                             | 0.62      | 0.03       | 0.02       | 0.02         | 94.12        |
