# Supplementary material for: Chemical composition of modern and fossil Hippopotamid teeth and implications for paleoenvironmental reconstructions and enamel formation – Part 1: Major and minor element variation
Source: Copernicus journal article supplement (doi:10.5194/bg-9-119-2012), 2012-01-06
Supplement: Supplementary file 2 [file bg-9-119-2012-supplement.zip]

**Table S1: Instrumental settings, detection limits and analytical uncertainties of the electron microprobe analyses**

| Element | Crystal | Line         | Measurement time (sec)<br>peak (Background) | Standard material<br>for calibration | Limit of Detection<br>oxide (wt.%) | SDev<br>(wt.%) |
|---------|---------|--------------|---------------------------------------------|--------------------------------------|------------------------------------|----------------|
| F       | LDE1    | K $\alpha_1$ | 60 (40)                                     | SrF <sub>2</sub>                     | 0.015                              | 0.03           |
| Na      | TAP     | K $\alpha_1$ | 20 (12)                                     | Albite                               | 0.059                              | 0.04           |
| Mg      | TAP     | K $\alpha_1$ | 30 (16)                                     | MgO                                  | 0.024                              | 0.02           |
| Al      | TAP     | K $\alpha_1$ | 20 (12)                                     | Orthoclase                           | 0.026                              | 0.02           |
| Sr      | TAP     | L $\alpha_1$ | 60 (30)                                     | SrF <sub>2</sub>                     | 0.026                              | 0.03           |
| Ca      | PETJ    | K $\alpha_1$ | 30 (16)                                     | Apatite                              | 0.027                              | 0.17           |
| P       | PETJ    | K $\alpha_1$ | 30 (16)                                     | Apatite                              | 0.161                              | 0.37           |
| K       | PETJ    | K $\alpha_1$ | 30 (16)                                     | Orthoclase                           | 0.017                              | 0.02           |
| Mn      | LIF     | K $\alpha_1$ | 60 (30)                                     | Rhodonite                            | 0.047                              | 0.03           |
| Fe      | LIF     | K $\alpha_1$ | 40 (20)                                     | Fe <sub>2</sub> O <sub>3</sub>       | 0.030                              | 0.02           |
| Cl      | PETH    | K $\alpha_1$ | 40 (24)                                     | Cancrinite                           | 0.004                              | 0.01           |
| S       | PETH    | K $\alpha_1$ | 30 (16)                                     | ZnS                                  | 0.044                              | 0.02           |
| Si      | PETH    | K $\alpha_1$ | 20 (10)                                     | Orthoclase                           | 0.031                              | 0.02           |
