# Supplementary material for: Chemical composition of modern and fossil Hippopotamid teeth and implications for paleoenvironmental reconstructions and enamel formation – Part 1: Major and minor element variation
Source: Copernicus journal article supplement (doi:10.5194/bg-9-119-2012), 2012-01-06
Supplement: Supplementary file 3 [file bg-9-119-2012-supplement.zip]

Cat# 007-06

*Hippopotamus sp*

Molar fragment Lake Albert, L-Nkondo Fm.

Surface Find

E30.89527824

N1.413623599

| Profile | Mineral | Distance<br>( $\mu\text{m}$ ) | P2O5  | SiO2 | FeO  | CaO   | MgO  | MnO  | SrO  | Na2O | F    | Cl   | SO3  | K2O  | Al2O3 | Total |
|---------|---------|-------------------------------|-------|------|------|-------|------|------|------|------|------|------|------|------|-------|-------|
| 3AB-01  | Enamel  | 50                            | 39.99 | 0.13 | 0.67 | 49.80 | 0.22 | 0.35 | 0.04 | 0.66 | 0.62 | 0.42 | 0.06 | 0.00 | 0.00  | 92.96 |
| 3AB-02  | Enamel  | 145                           | 40.60 | 0.16 | 1.06 | 50.49 | 0.16 | 0.40 | 0.10 | 0.69 | 0.30 | 0.48 | 0.04 | 0.02 | 0.01  | 94.53 |
| 3AB-03  | Enamel  | 290                           | 40.60 | 0.12 | 0.92 | 49.95 | 0.14 | 0.39 | 0.05 | 0.79 | 0.31 | 0.48 | 0.08 | 0.02 | 0.02  | 93.85 |
| 3AB-04  | Enamel  | 435                           | 40.29 | 0.05 | 0.69 | 50.23 | 0.14 | 0.40 | 0.08 | 0.76 | 0.26 | 0.45 | 0.04 | 0.02 | 0.03  | 93.45 |
| 3AB-05  | Enamel  | 580                           | 40.56 | 0.07 | 0.72 | 50.54 | 0.19 | 0.33 | 0.07 | 0.81 | 0.31 | 0.43 | 0.03 | 0.02 | 0.01  | 94.09 |
| 3AB-06  | Enamel  | 725                           | 40.50 | 0.07 | 0.73 | 49.68 | 0.18 | 0.30 | 0.07 | 0.91 | 0.20 | 0.40 | 0.02 | 0.02 | 0.08  | 93.15 |
| 3AB-07  | Enamel  | 870                           | 39.74 | 0.08 | 0.63 | 50.39 | 0.20 | 0.25 | 0.05 | 0.86 | 0.18 | 0.41 | 0.03 | 0.03 | 0.00  | 92.86 |
| 3AB-08  | Enamel  | 1015                          | 39.94 | 0.02 | 0.55 | 49.67 | 0.18 | 0.22 | 0.04 | 0.88 | 0.20 | 0.38 | 0.02 | 0.01 | 0.02  | 92.12 |
| 3AB-09  | Enamel  | 1160                          | 39.86 | 0.02 | 0.53 | 49.94 | 0.23 | 0.23 | 0.10 | 0.83 | 0.19 | 0.34 | 0.03 | 0.02 | 0.04  | 92.36 |
| 3AB-10  | Enamel  | 1305                          | 39.70 | 0.00 | 0.57 | 49.57 | 0.21 | 0.16 | 0.10 | 0.94 | 0.19 | 0.31 | 0.04 | 0.03 | 0.10  | 91.92 |
| 3AB-11  | Enamel  | 1450                          | 40.32 | 0.01 | 0.60 | 49.65 | 0.18 | 0.24 | 0.06 | 1.00 | 0.15 | 0.28 | 0.00 | 0.00 | 0.01  | 92.51 |
| 3AB-12  | Enamel  | 1595                          | 39.24 | 0.01 | 0.50 | 49.19 | 0.20 | 0.31 | 0.06 | 1.07 | 0.11 | 0.26 | 0.01 | 0.02 | 0.03  | 91.00 |
| 3AB-13  | Enamel  | 1740                          | 39.40 | 0.03 | 0.62 | 48.53 | 0.21 | 0.26 | 0.04 | 1.09 | 0.18 | 0.24 | 0.03 | 0.03 | 0.06  | 90.72 |
| 3AB-14  | Enamel  | 1885                          | 38.55 | 0.04 | 0.65 | 49.05 | 0.20 | 0.21 | 0.07 | 1.10 | 0.17 | 0.22 | 0.00 | 0.00 | 0.00  | 90.27 |
| 3AB-15  | Enamel  | 2030                          | 38.27 | 0.05 | 0.69 | 48.89 | 0.23 | 0.24 | 0.11 | 1.08 | 0.25 | 0.20 | 0.02 | 0.02 | 0.02  | 90.07 |
| 3AB-16  | Enamel  | 2175                          | 38.22 | 0.01 | 0.74 | 48.07 | 0.25 | 0.25 | 0.06 | 1.25 | 0.24 | 0.16 | 0.03 | 0.04 | 0.00  | 89.31 |
| 3AB-17  | Dentin  | 2320                          | 35.90 | 0.35 | 2.19 | 47.42 | 0.18 | 1.29 | 0.23 | 0.73 | 1.69 | 0.03 | 0.04 | 0.00 | 0.01  | 90.06 |
| 3AB-18  | Dentin  | 2465                          | 36.65 | 0.24 | 1.71 | 47.03 | 0.15 | 0.89 | 0.27 | 0.66 | 1.83 | 0.01 | 0.12 | 0.00 | 0.01  | 89.57 |
| 3AB-19  | Dentin  | 2610                          | 36.19 | 0.28 | 1.56 | 48.36 | 0.16 | 1.00 | 0.23 | 0.57 | 1.99 | 0.01 | 0.15 | 0.00 | 0.00  | 90.49 |
| 3AB-20  | Dentin  | 2755                          | 37.81 | 0.06 | 0.75 | 49.57 | 0.16 | 0.97 | 0.09 | 0.57 | 2.16 | 0.01 | 0.12 | 0.00 | 0.00  | 92.29 |

Cat# 007-06

*Hippopotamus sp*

Molar fragment Lake Albert, L-Nkondo Fm.

Surface Find

E30.89527824

N1.413623599

| Profile | Mineral | Distance<br>( $\mu\text{m}$ ) | P2O5  | SiO2 | FeO  | CaO   | MgO  | MnO  | SrO  | Na2O | F    | Cl   | SO3  | K2O  | Al2O3 | Total |
|---------|---------|-------------------------------|-------|------|------|-------|------|------|------|------|------|------|------|------|-------|-------|
| 2AB-01  | Enamel  | 50                            | 40.12 | 0.08 | 1.15 | 49.70 | 0.16 | 0.20 | 0.03 | 0.59 | 0.44 | 0.58 | 0.08 | 0.03 | 0.01  | 93.16 |
| 2AB-02  | Enamel  | 132                           | 38.93 | 0.17 | 1.02 | 49.66 | 0.14 | 0.22 | 0.03 | 0.68 | 0.53 | 0.51 | 0.08 | 0.03 | 0.02  | 92.03 |
| 2AB-03  | Enamel  | 264                           | 39.57 | 0.07 | 0.80 | 49.69 | 0.13 | 0.31 | 0.05 | 0.79 | 0.32 | 0.48 | 0.02 | 0.02 | 0.01  | 92.25 |
| 2AB-04  | Enamel  | 396                           | 38.84 | 0.15 | 1.59 | 49.43 | 0.13 | 0.44 | 0.04 | 0.81 | 0.34 | 0.45 | 0.06 | 0.03 | 0.00  | 92.31 |
| 2AB-05  | Enamel  | 528                           | 39.05 | 0.04 | 0.40 | 50.11 | 0.21 | 0.26 | 0.07 | 0.85 | 0.16 | 0.43 | 0.01 | 0.01 | 0.02  | 91.61 |
| 2AB-06  | Enamel  | 660                           | 39.26 | 0.02 | 0.41 | 48.93 | 0.18 | 0.25 | 0.04 | 0.87 | 0.11 | 0.40 | 0.02 | 0.02 | 0.03  | 90.54 |
| 2AB-07  | Enamel  | 792                           | 38.63 | 0.07 | 0.73 | 49.41 | 0.22 | 0.17 | 0.08 | 0.87 | 0.14 | 0.37 | 0.01 | 0.03 | 0.01  | 90.75 |
| 2AB-08  | Enamel  | 924                           | 39.01 | 0.05 | 0.76 | 48.26 | 0.22 | 0.16 | 0.10 | 0.89 | 0.16 | 0.36 | 0.00 | 0.01 | 0.03  | 90.01 |
| 2AB-09  | Enamel  | 1056                          | 38.94 | 0.02 | 0.61 | 48.78 | 0.21 | 0.22 | 0.05 | 0.98 | 0.18 | 0.31 | 0.02 | 0.00 | 0.00  | 90.32 |
| 2AB-10  | Enamel  | 1188                          | 39.23 | 0.02 | 0.62 | 47.93 | 0.15 | 0.23 | 0.04 | 0.92 | 0.15 | 0.32 | 0.04 | 0.02 | 0.06  | 89.74 |
| 2AB-11  | Enamel  | 1320                          | 39.01 | 0.02 | 0.67 | 48.89 | 0.21 | 0.25 | 0.08 | 0.97 | 0.15 | 0.30 | 0.00 | 0.03 | 0.00  | 90.59 |
| 2AB-12  | Enamel  | 1452                          | 38.40 | 0.02 | 0.63 | 48.07 | 0.16 | 0.27 | 0.08 | 0.96 | 0.16 | 0.27 | 0.05 | 0.02 | 0.05  | 89.14 |
| 2AB-13  | Enamel  | 1584                          | 38.23 | 0.02 | 0.70 | 47.52 | 0.21 | 0.27 | 0.05 | 1.10 | 0.17 | 0.26 | 0.04 | 0.03 | 0.00  | 88.60 |
| 2AB-14  | Enamel  | 1716                          | 37.84 | 0.02 | 0.61 | 48.18 | 0.19 | 0.22 | 0.08 | 1.11 | 0.24 | 0.24 | 0.01 | 0.02 | 0.01  | 88.77 |
| 2AB-15  | Enamel  | 1848                          | 38.76 | 0.02 | 0.64 | 46.62 | 0.22 | 0.26 | 0.08 | 1.09 | 0.19 | 0.20 | 0.01 | 0.02 | 0.01  | 88.12 |
| 2AB-16  | Enamel  | 1980                          | 37.22 | 0.04 | 0.76 | 46.93 | 0.18 | 0.27 | 0.09 | 1.23 | 0.29 | 0.18 | 0.03 | 0.00 | 0.02  | 87.24 |
| 2AB-17  | dentin  | 2112                          | 36.69 | 0.30 | 1.67 | 47.78 | 0.23 | 0.73 | 0.22 | 0.57 | 1.87 | 0.06 | 0.12 | 0.01 | 0.00  | 90.25 |
| 2AB-18  | dentin  | 2244                          | 35.42 | 0.38 | 2.03 | 46.77 | 0.23 | 0.83 | 0.20 | 0.47 | 1.89 | 0.01 | 0.10 | 0.00 | 0.01  | 88.34 |
| 2AB-19  | dentin  | 2376                          | 35.75 | 0.23 | 2.21 | 47.23 | 0.16 | 0.82 | 0.26 | 0.53 | 1.82 | 0.01 | 0.07 | 0.01 | 0.01  | 89.10 |
| 2AB-20  | dentin  | 2508                          | 36.33 | 0.21 | 1.92 | 46.31 | 0.22 | 0.80 | 0.25 | 0.53 | 1.98 | 0.01 | 0.10 | 0.01 | 0.00  | 88.67 |

Cat# 007-06

*Hippopotamus sp*

Molar fragment Lake Albert, L-Nkondo Fm.

Surface Find

E30.89527824

N1.413623599

| Profile | Mineral | Distance<br>( $\mu\text{m}$ ) | P2O5  | SiO2 | FeO  | CaO   | MgO  | MnO  | SrO  | Na2O | F    | Cl   | SO3  | K2O  | Al2O3 | Total |
|---------|---------|-------------------------------|-------|------|------|-------|------|------|------|------|------|------|------|------|-------|-------|
| 1AB-01  | Enamel  | 50                            | 37.79 | 0.01 | 0.43 | 48.68 | 0.20 | 0.23 | 0.01 | 0.80 | 0.15 | 0.49 | 0.06 | 0.01 | 0.01  | 88.87 |
| 1AB-02  | Enamel  | 111                           | 38.91 | 0.01 | 0.51 | 48.67 | 0.24 | 0.29 | 0.01 | 0.77 | 0.19 | 0.42 | 0.04 | 0.02 | 0.00  | 90.08 |
| 1AB-03  | Enamel  | 222                           | 38.82 | 0.00 | 0.56 | 48.13 | 0.23 | 0.32 | 0.08 | 0.89 | 0.16 | 0.39 | 0.00 | 0.01 | 0.03  | 89.62 |
| 1AB-04  | Enamel  | 333                           | 37.41 | 0.02 | 0.62 | 48.33 | 0.20 | 0.26 | 0.07 | 0.87 | 0.14 | 0.36 | 0.02 | 0.00 | 0.03  | 88.34 |
| 1AB-05  | Enamel  | 444                           | 38.63 | 0.02 | 0.64 | 47.74 | 0.22 | 0.26 | 0.08 | 0.89 | 0.18 | 0.35 | 0.03 | 0.02 | 0.03  | 89.08 |
| 1AB-06  | Enamel  | 555                           | 36.67 | 0.03 | 0.56 | 48.20 | 0.20 | 0.23 | 0.04 | 0.85 | 0.19 | 0.32 | 0.01 | 0.02 | 0.26  | 87.59 |
| 1AB-07  | Enamel  | 666                           | 38.30 | 0.00 | 0.68 | 48.41 | 0.20 | 0.18 | 0.08 | 0.95 | 0.19 | 0.30 | 0.00 | 0.03 | 0.01  | 89.32 |
| 1AB-08  | Enamel  | 777                           | 37.71 | 0.02 | 0.70 | 47.76 | 0.18 | 0.29 | 0.09 | 0.99 | 0.24 | 0.26 | 0.02 | 0.03 | 0.00  | 88.29 |
| 1AB-09  | Enamel  | 888                           | 37.64 | 0.01 | 0.72 | 47.95 | 0.22 | 0.26 | 0.09 | 0.97 | 0.21 | 0.28 | 0.03 | 0.03 | 0.03  | 88.44 |
| 1AB-10  | Enamel  | 999                           | 38.17 | 0.02 | 0.64 | 46.87 | 0.19 | 0.33 | 0.06 | 1.00 | 0.21 | 0.25 | 0.00 | 0.02 | 0.00  | 87.78 |
| 1AB-11  | Enamel  | 1110                          | 36.90 | 0.04 | 0.68 | 47.64 | 0.23 | 0.25 | 0.04 | 1.11 | 0.24 | 0.23 | 0.03 | 0.00 | 0.06  | 87.44 |
| 1AB-12  | Enamel  | 1221                          | 37.68 | 0.02 | 0.70 | 46.33 | 0.26 | 0.26 | 0.14 | 1.09 | 0.21 | 0.22 | 0.00 | 0.03 | 0.01  | 86.97 |
| 1AB-13  | Enamel  | 1332                          | 36.26 | 0.01 | 0.68 | 47.13 | 0.23 | 0.37 | 0.10 | 1.14 | 0.30 | 0.21 | 0.02 | 0.02 | 0.21  | 86.67 |
| 1AB-14  | Enamel  | 1443                          | 37.79 | 0.00 | 0.75 | 46.41 | 0.21 | 0.43 | 0.07 | 1.18 | 0.26 | 0.18 | 0.02 | 0.02 | 0.00  | 87.31 |
| 1AB-15  | Enamel  | 1554                          | 37.40 | 0.00 | 0.76 | 46.96 | 0.25 | 0.38 | 0.07 | 1.16 | 0.20 | 0.18 | 0.00 | 0.02 | 0.04  | 87.41 |
| 1AB-16  | Enamel  | 1665                          | 36.90 | 0.02 | 0.74 | 47.12 | 0.23 | 0.34 | 0.07 | 1.20 | 0.29 | 0.16 | 0.02 | 0.03 | 0.03  | 87.13 |
| 1AB-17  | dentin  | 1776                          | 36.41 | 0.13 | 1.55 | 47.34 | 0.17 | 0.89 | 0.20 | 0.57 | 1.93 | 0.04 | 0.14 | 0.00 | 0.01  | 89.38 |
| 1AB-18  | dentin  | 1887                          | 34.78 | 0.20 | 2.00 | 46.36 | 0.15 | 1.05 | 0.20 | 0.70 | 1.92 | 0.01 | 0.09 | 0.00 | 0.01  | 87.48 |
| 1AB-19  | dentin  | 1998                          | 35.10 | 0.15 | 2.14 | 45.77 | 0.14 | 1.06 | 0.25 | 0.53 | 1.96 | 0.01 | 0.09 | 0.02 | 0.01  | 87.24 |
| 1AB-20  | dentin  | 2109                          | 34.32 | 0.12 | 2.08 | 45.98 | 0.14 | 0.94 | 0.22 | 0.59 | 1.85 | 0.01 | 0.05 | 0.01 | 0.00  | 86.31 |

| GPS396-core     | <i>Hippopotamus sp</i> |               | molar P fragm Lake Albert, Warwire Fm. |      |      |       |      |      |      |      | Surface Find | E30° 55.318' | N01° 25.608' |      |       |      |       |
|-----------------|------------------------|---------------|----------------------------------------|------|------|-------|------|------|------|------|--------------|--------------|--------------|------|-------|------|-------|
| Sample          | Mineral                | Distance (µm) | P2O5                                   | SiO2 | FeO  | CaO   | MgO  | MnO  | SrO  | Na2O | F            | Cl           | SO3          | K2O  | Al2O3 | H2O  | Total |
| GPS 396-1 AB-01 | Enamel                 | 50            | 35.63                                  | 0.39 | 0.40 | 46.91 | 0.09 | 0.00 | 0.08 | 0.43 | 0.77         | 0.62         | 0.09         | 0.05 | 0.06  | 1.05 | 86.55 |
| GPS 396-1 AB-02 | Enamel                 | 148           | 37.60                                  | 0.16 | 0.28 | 49.48 | 0.11 | 0.22 | 0.08 | 0.46 | 1.06         | 0.55         | 0.10         | 0.00 | 0.03  | 1.00 | 91.11 |
| GPS 396-1 AB-03 | Enamel                 | 246           | 38.76                                  | 0.00 | 0.43 | 51.30 | 0.11 | 0.21 | 0.10 | 0.44 | 1.59         | 0.43         | 0.15         | 0.00 | 0.03  | 0.83 | 94.39 |
| GPS 396-1 AB-04 | Enamel                 | 344           | 38.36                                  | 0.15 | 0.59 | 51.44 | 0.15 | 0.23 | 0.09 | 0.53 | 1.64         | 0.39         | 0.17         | 0.00 | 0.07  | 0.82 | 94.61 |
| GPS 396-1 AB-05 | Enamel                 | 442           | 39.23                                  | 0.05 | 0.34 | 51.39 | 0.14 | 0.21 | 0.10 | 0.51 | 1.41         | 0.40         | 0.16         | 0.00 | 0.03  | 0.93 | 94.89 |
| GPS 396-1 AB-06 | Enamel                 | 540           | 39.18                                  | 0.09 | 0.47 | 51.41 | 0.14 | 0.25 | 0.09 | 0.47 | 1.36         | 0.40         | 0.16         | 0.00 | 0.00  | 0.95 | 94.95 |
| GPS 396-1 AB-07 | Enamel                 | 638           | 38.95                                  | 0.65 | 0.66 | 50.82 | 0.16 | 0.25 | 0.10 | 0.49 | 1.71         | 0.37         | 0.24         | 0.02 | 0.07  | 0.81 | 95.29 |
| GPS 396-1 AB-08 | Enamel                 | 736           | 35.16                                  | 1.11 | 6.66 | 46.49 | 0.15 | 0.24 | 0.08 | 0.48 | 1.48         | 0.31         | 0.18         | 0.00 | 0.30  | 0.88 | 93.52 |
| GPS 396-1 AB-09 | Enamel                 | 834           | 39.10                                  | 0.00 | 0.22 | 51.71 | 0.14 | 0.25 | 0.05 | 0.56 | 1.38         | 0.35         | 0.18         | 0.00 | 0.00  | 0.95 | 94.88 |
| GPS 396-1 AB-10 | Enamel                 | 932           | 39.27                                  | 0.00 | 0.27 | 51.54 | 0.17 | 0.22 | 0.09 | 0.62 | 1.05         | 0.39         | 0.17         | 0.02 | 0.00  | 1.08 | 94.89 |
| GPS 396-1 AB-11 | Enamel                 | 1030          | 39.20                                  | 0.04 | 0.27 | 51.89 | 0.14 | 0.23 | 0.09 | 0.59 | 1.17         | 0.38         | 0.20         | 0.00 | 0.00  | 1.04 | 95.22 |
| GPS 396-1 AB-12 | Enamel                 | 1128          | 39.65                                  | 0.00 | 0.25 | 51.96 | 0.15 | 0.21 | 0.13 | 0.57 | 1.03         | 0.37         | 0.18         | 0.00 | 0.04  | 1.11 | 95.64 |
| GPS 396-1 AB-13 | Enamel                 | 1226          | 39.03                                  | 1.14 | 0.89 | 50.78 | 0.20 | 0.26 | 0.12 | 0.61 | 1.04         | 0.34         | 0.14         | 0.00 | 0.18  | 1.11 | 95.84 |
| GPS 396-1 AB-14 | Enamel                 | 1324          | 37.25                                  | 2.49 | 1.54 | 49.62 | 0.21 | 0.26 | 0.11 | 0.56 | 1.36         | 0.30         | 0.16         | 0.04 | 0.28  | 0.97 | 95.15 |
| GPS 396-1 AB-15 | Enamel                 | 1422          | 38.43                                  | 0.62 | 0.58 | 51.45 | 0.17 | 0.18 | 0.11 | 0.67 | 1.33         | 0.29         | 0.16         | 0.03 | 0.03  | 0.98 | 95.04 |
| GPS 396-1 AB-16 | Enamel                 | 1520          | 39.09                                  | 0.03 | 0.24 | 51.87 | 0.18 | 0.24 | 0.07 | 0.63 | 1.22         | 0.30         | 0.13         | 0.02 | 0.00  | 1.03 | 95.07 |
| GPS 396-1 AB-17 | Enamel                 | 1618          | 38.18                                  | 0.86 | 0.84 | 50.74 | 0.21 | 0.21 | 0.09 | 0.68 | 1.23         | 0.28         | 0.12         | 0.03 | 0.11  | 1.02 | 94.61 |
| GPS 396-1 AB-18 | Enamel                 | 1716          | 37.67                                  | 0.33 | 0.93 | 49.93 | 0.11 | 1.14 | 0.12 | 0.48 | 2.18         | 0.15         | 0.16         | 0.00 | 0.09  | 0.64 | 93.93 |
| GPS 396-1 AB-19 | Enamel                 | 1814          | 38.48                                  | 0.14 | 0.56 | 50.60 | 0.16 | 0.76 | 0.11 | 0.60 | 1.84         | 0.19         | 0.17         | 0.00 | 0.04  | 0.78 | 94.44 |
| GPS 396-1 AB-20 | Enamel                 | 1912          | 38.78                                  | 0.15 | 0.47 | 50.40 | 0.19 | 0.53 | 0.12 | 0.61 | 1.58         | 0.19         | 0.16         | 0.00 | 0.06  | 0.89 | 94.13 |
| GPS 396-1 AB-21 | Enamel                 | 2010          | 37.94                                  | 0.16 | 0.52 | 50.70 | 0.16 | 0.51 | 0.08 | 0.64 | 1.69         | 0.17         | 0.14         | 0.03 | 0.07  | 0.84 | 93.68 |
| GPS 396-1 AB-22 | Enamel                 | 2108          | 38.60                                  | 0.14 | 0.56 | 50.08 | 0.18 | 0.45 | 0.09 | 0.73 | 1.39         | 0.20         | 0.12         | 0.00 | 0.08  | 0.97 | 93.57 |
| GPS 396-1 AB-23 | Enamel                 | 2206          | 38.16                                  | 0.18 | 0.59 | 49.40 | 0.17 | 0.51 | 0.12 | 0.67 | 1.48         | 0.17         | 0.15         | 0.00 | 0.05  | 0.93 | 92.56 |
| GPS 396-1 AB-24 | Enamel                 | 2304          | 38.40                                  | 0.19 | 0.51 | 49.81 | 0.17 | 0.69 | 0.11 | 0.72 | 1.58         | 0.15         | 0.16         | 0.00 | 0.05  | 0.90 | 93.44 |
| GPS 396-1 AB-25 | Enamel                 | 2402          | 38.00                                  | 0.32 | 0.91 | 49.10 | 0.14 | 0.74 | 0.12 | 0.65 | 1.91         | 0.11         | 0.18         | 0.02 | 0.05  | 0.76 | 93.02 |
| GPS 396-1 AB-26 | Enamel                 | 2500          | 37.83                                  | 0.17 | 1.01 | 48.84 | 0.10 | 1.02 | 0.15 | 0.34 | 3.12         | 0.02         | 0.28         | 0.00 | 0.06  | 0.26 | 93.19 |
| GPS 396-1 AB-27 | Enamel                 | 2598          | 36.94                                  | 0.13 | 1.11 | 48.98 | 0.10 | 1.10 | 0.14 | 0.32 | 3.22         | 0.02         | 0.28         | 0.00 | 0.05  | 0.22 | 92.59 |
| GPS 396-1 AB-28 | Enamel                 | 2696          | 36.94                                  | 0.20 | 1.42 | 48.74 | 0.10 | 0.84 | 0.17 | 0.36 | 2.66         | 0.01         | 0.26         | 0.00 | 0.06  | 0.46 | 92.20 |
| GPS 396-1 AB-29 | Enamel                 | 2794          | 37.18                                  | 0.31 | 1.26 | 49.27 | 0.11 | 0.85 | 0.18 | 0.41 | 2.78         | 0.01         | 0.32         | 0.00 | 0.09  | 0.41 | 93.17 |
| GPS 396-1 AB-30 | Enamel                 | 2892          | 37.17                                  | 0.08 | 1.17 | 49.13 | 0.10 | 0.81 | 0.17 | 0.40 | 2.79         | 0.01         | 0.32         | 0.00 | 0.03  | 0.40 | 92.57 |

| GPS396-core     | <i>Hippopotamus sp</i> |               | molar P fragm Lake Albert, Warwire Fm. |      |      |       |      |      |      |      | Surface Find | E30° 55.318' |      | N01° 25.608' |       |       |       |
|-----------------|------------------------|---------------|----------------------------------------|------|------|-------|------|------|------|------|--------------|--------------|------|--------------|-------|-------|-------|
| Sample          | Mineral                | Distance (µm) | P2O5                                   | SiO2 | FeO  | CaO   | MgO  | MnO  | SrO  | Na2O | F            | Cl           | SO3  | K2O          | Al2O3 | H2O   | Total |
| GPS 396-2 AB-01 | Enamel                 | 50            | 38.64                                  | 0.25 | 0.70 | 50.01 | 0.09 | 0.16 | 0.10 | 0.53 | 1.73         | 0.45         | 0.13 | 0.00         | 0.04  | 0.76  | 93.60 |
| GPS 396-2 AB-02 | Enamel                 | 150           | 38.42                                  | 0.32 | 0.54 | 50.68 | 0.13 | 0.19 | 0.10 | 0.43 | 1.70         | 0.47         | 0.13 | 0.00         | 0.04  | 0.78  | 93.91 |
| GPS 396-2 AB-03 | Enamel                 | 250           | 38.43                                  | 0.59 | 0.61 | 51.44 | 0.14 | 0.16 | 0.09 | 0.46 | 1.47         | 0.49         | 0.16 | 0.02         | 0.07  | 0.88  | 95.01 |
| GPS 396-2 AB-04 | Enamel                 | 350           | 38.83                                  | 0.70 | 0.67 | 50.91 | 0.14 | 0.26 | 0.09 | 0.41 | 1.49         | 0.48         | 0.18 | 0.00         | 0.10  | 0.88  | 95.14 |
| GPS 396-2 AB-05 | Enamel                 | 450           | 39.20                                  | 0.17 | 0.38 | 51.29 | 0.12 | 0.15 | 0.08 | 0.47 | 1.60         | 0.44         | 0.15 | 0.00         | 0.04  | 0.84  | 94.92 |
| GPS 396-2 AB-06 | Enamel                 | 550           | 38.67                                  | 0.47 | 0.44 | 51.08 | 0.16 | 0.23 | 0.09 | 0.49 | 1.51         | 0.44         | 0.18 | 0.00         | 0.08  | 0.87  | 94.69 |
| GPS 396-2 AB-07 | Enamel                 | 650           | 38.47                                  | 0.78 | 0.65 | 50.79 | 0.15 | 0.20 | 0.11 | 0.54 | 1.54         | 0.38         | 0.22 | 0.02         | 0.11  | 0.87  | 94.85 |
| GPS 396-2 AB-08 | Enamel                 | 750           | 38.90                                  | 0.31 | 0.45 | 50.86 | 0.17 | 0.17 | 0.11 | 0.54 | 1.60         | 0.38         | 0.19 | 0.03         | 0.05  | 0.85  | 94.59 |
| GPS 396-2 AB-09 | Enamel                 | 850           | 38.66                                  | 0.19 | 0.31 | 50.63 | 0.15 | 0.26 | 0.10 | 0.60 | 1.59         | 0.34         | 0.17 | 0.04         | 0.05  | 0.86  | 93.93 |
| GPS 396-2 AB-10 | Enamel                 | 950           | 39.48                                  | 0.00 | 0.32 | 51.04 | 0.14 | 0.29 | 0.09 | 0.56 | 1.33         | 0.36         | 0.11 | 0.00         | 0.00  | 0.97  | 94.68 |
| GPS 396-2 AB-11 | Enamel                 | 1050          | 38.72                                  | 0.15 | 0.83 | 51.00 | 0.12 | 0.48 | 0.10 | 0.40 | 2.31         | 0.22         | 0.20 | 0.00         | 0.04  | 0.57  | 95.14 |
| GPS 396-2 AB-12 | Enamel                 | 1150          | 39.05                                  | 0.00 | 0.34 | 50.61 | 0.17 | 0.36 | 0.11 | 0.58 | 1.57         | 0.30         | 0.16 | 0.00         | 0.00  | 0.87  | 94.11 |
| GPS 396-2 AB-13 | Enamel                 | 1250          | 38.97                                  | 0.06 | 0.36 | 50.76 | 0.15 | 0.37 | 0.08 | 0.64 | 1.38         | 0.28         | 0.17 | 0.00         | 0.00  | 0.96  | 94.17 |
| GPS 396-2 AB-14 | Enamel                 | 1350          | 38.19                                  | 0.17 | 0.46 | 50.30 | 0.17 | 0.41 | 0.15 | 0.71 | 1.41         | 0.27         | 0.15 | 0.00         | 0.04  | 0.94  | 93.35 |
| GPS 396-2 AB-15 | Enamel                 | 1450          | 38.54                                  | 0.20 | 0.49 | 50.12 | 0.19 | 0.38 | 0.10 | 0.75 | 1.31         | 0.25         | 0.15 | 0.00         | 0.04  | 0.99  | 93.50 |
| GPS 396-2 AB-16 | Enamel                 | 1550          | 38.46                                  | 0.20 | 0.46 | 50.11 | 0.18 | 0.50 | 0.12 | 0.67 | 1.34         | 0.24         | 0.17 | 0.00         | 0.07  | 0.98  | 93.51 |
| GPS 396-2 AB-17 | Enamel                 | 1650          | 38.31                                  | 0.17 | 0.42 | 49.61 | 0.16 | 0.45 | 0.12 | 0.73 | 1.33         | 0.24         | 0.17 | 0.02         | 0.06  | 0.98  | 92.78 |
| GPS 396-2 AB-18 | Enamel                 | 1750          | 39.27                                  | 0.16 | 0.59 | 49.58 | 0.19 | 0.47 | 0.13 | 0.68 | 1.34         | 0.21         | 0.17 | 0.00         | 0.07  | 0.99  | 93.84 |
| GPS 396-2 AB-19 | Enamel                 | 1850          | 38.57                                  | 0.21 | 0.64 | 49.47 | 0.16 | 0.53 | 0.11 | 0.71 | 1.45         | 0.17         | 0.14 | 0.00         | 0.04  | 0.94  | 93.14 |
| GPS 396-2 AB-20 | Enamel                 | 1950          | 38.29                                  | 0.24 | 0.80 | 49.27 | 0.14 | 0.71 | 0.13 | 0.57 | 2.11         | 0.14         | 0.17 | 0.00         | 0.05  | 0.67  | 93.30 |
| GPS 396-2 AB-21 | Enamel                 | 2050          | 37.99                                  | 0.22 | 0.79 | 49.60 | 0.14 | 0.65 | 0.14 | 0.70 | 1.98         | 0.08         | 0.16 | 0.02         | 0.07  | 0.74  | 93.30 |
| GPS 396-2 AB-22 | Enamel                 | 2150          | 37.14                                  | 0.11 | 0.96 | 49.61 | 0.10 | 0.99 | 0.15 | 0.38 | 3.05         | 0.03         | 0.25 | 0.00         | 0.05  | 0.29  | 93.10 |
| GPS 396-2 AB-23 | Enamel                 | 2250          | 36.20                                  | 0.06 | 0.58 | 50.33 | 0.09 | 1.01 | 0.14 | 0.24 | 3.85         | 0.00         | 0.35 | 0.00         | 0.07  | -0.05 | 92.86 |
| GPS 396-2 AB-24 | Enamel                 | 2350          | 37.25                                  | 0.13 | 0.98 | 49.98 | 0.10 | 0.88 | 0.14 | 0.36 | 2.93         | 0.01         | 0.27 | 0.00         | 0.07  | 0.34  | 93.45 |
| GPS 396-2 AB-25 | Enamel                 | 2450          | 37.35                                  | 0.08 | 0.93 | 49.98 | 0.09 | 1.03 | 0.18 | 0.34 | 3.18         | 0.02         | 0.27 | 0.00         | 0.07  | 0.24  | 93.75 |
| GPS 396-2 AB-26 | Enamel                 | 2550          | 37.87                                  | 0.10 | 1.04 | 50.19 | 0.10 | 0.93 | 0.17 | 0.37 | 2.98         | 0.00         | 0.34 | 0.00         | 0.07  | 0.33  | 94.47 |
| GPS 396-2 AB-27 | Enamel                 | 2650          | 34.90                                  | 0.06 | 0.64 | 49.50 | 0.09 | 4.13 | 0.15 | 0.23 | 3.42         | 0.01         | 0.17 | 0.00         | 0.06  | 0.13  | 93.49 |
| GPS 396-2 AB-28 | Enamel                 | 2750          | 37.20                                  | 0.24 | 1.21 | 49.73 | 0.11 | 0.98 | 0.16 | 0.37 | 2.96         | 0.00         | 0.27 | 0.00         | 0.08  | 0.33  | 93.64 |
| GPS 396-2 AB-29 | Enamel                 | 2850          | 36.99                                  | 0.09 | 0.98 | 50.55 | 0.09 | 1.07 | 0.16 | 0.23 | 3.49         | 0.01         | 0.29 | 0.00         | 0.00  | 0.10  | 94.05 |
| GPS 396-2 AB-30 | Enamel                 | 2950          | 37.45                                  | 0.26 | 1.22 | 50.47 | 0.08 | 0.89 | 0.17 | 0.39 | 3.05         | 0.01         | 0.32 | 0.00         | 0.05  | 0.30  | 94.65 |

GPS405-core

*Hippopotamus sp*

Molar M3 frag Lake Albert, Warwire Fm.

Surface Find

E30° 52.925'

N001° 24.398'

| Sample          | Mineral | Distance<br>( $\mu\text{m}$ ) | P2O5  | SiO2 | FeO  | CaO   | MgO  | MnO  | SrO  | Na2O | F    | Cl   | SO3  | K2O  | Al2O3 | H2O  | Total |
|-----------------|---------|-------------------------------|-------|------|------|-------|------|------|------|------|------|------|------|------|-------|------|-------|
| GPS 405-1 AB-01 | Enamel  | 50                            | 36.88 | 0.41 | 6.02 | 47.56 | 0.12 | 0.37 | 0.07 | 0.47 | 0.69 | 0.53 | 0.06 | 0.00 | 0.05  | 1.17 | 94.38 |
| GPS 405-1 AB-02 | Enamel  | 148                           | 40.41 | 0.00 | 0.45 | 51.80 | 0.17 | 0.12 | 0.07 | 0.68 | 0.33 | 0.58 | 0.13 | 0.00 | 0.00  | 1.37 | 96.10 |
| GPS 405-1 AB-03 | Enamel  | 246                           | 40.20 | 0.00 | 0.32 | 51.31 | 0.13 | 0.11 | 0.05 | 0.79 | 0.35 | 0.55 | 0.00 | 0.00 | 0.00  | 1.36 | 95.17 |
| GPS 405-1 AB-04 | Enamel  | 344                           | 40.17 | 0.00 | 0.29 | 51.45 | 0.15 | 0.11 | 0.06 | 0.72 | 0.34 | 0.51 | 0.00 | 0.00 | 0.00  | 1.37 | 95.17 |
| GPS 405-1 AB-05 | Enamel  | 442                           | 40.03 | 0.05 | 0.29 | 51.57 | 0.17 | 0.12 | 0.07 | 0.74 | 0.36 | 0.49 | 0.00 | 0.02 | 0.00  | 1.37 | 95.27 |
| GPS 405-1 AB-06 | Enamel  | 540                           | 39.83 | 0.00 | 0.33 | 51.43 | 0.17 | 0.09 | 0.06 | 0.76 | 0.37 | 0.47 | 0.00 | 0.00 | 0.00  | 1.36 | 94.86 |
| GPS 405-1 AB-07 | Enamel  | 638                           | 39.75 | 0.00 | 0.26 | 52.01 | 0.18 | 0.06 | 0.07 | 0.76 | 0.38 | 0.44 | 0.00 | 0.00 | 0.00  | 1.37 | 95.27 |
| GPS 405-1 AB-08 | Enamel  | 736                           | 39.92 | 0.00 | 0.24 | 51.78 | 0.18 | 0.11 | 0.06 | 0.73 | 0.38 | 0.45 | 0.06 | 0.02 | 0.00  | 1.37 | 95.29 |
| GPS 405-1 AB-09 | Enamel  | 834                           | 39.75 | 0.00 | 0.28 | 51.17 | 0.19 | 0.08 | 0.07 | 0.87 | 0.46 | 0.38 | 0.00 | 0.00 | 0.00  | 1.34 | 94.59 |
| GPS 405-1 AB-10 | Enamel  | 932                           | 39.98 | 0.05 | 0.25 | 51.39 | 0.19 | 0.06 | 0.04 | 0.87 | 0.45 | 0.37 | 0.00 | 0.00 | 0.00  | 1.35 | 95.01 |
| GPS 405-1 AB-11 | Enamel  | 1030                          | 39.73 | 0.08 | 0.27 | 51.20 | 0.18 | 0.12 | 0.06 | 0.92 | 0.48 | 0.34 | 0.00 | 0.02 | 0.00  | 1.35 | 94.75 |
| GPS 405-1 AB-12 | Enamel  | 1128                          | 39.41 | 0.03 | 0.30 | 50.41 | 0.22 | 0.06 | 0.06 | 0.94 | 0.54 | 0.32 | 0.06 | 0.00 | 0.00  | 1.31 | 93.66 |
| GPS 405-1 AB-13 | Enamel  | 1226                          | 39.40 | 0.06 | 0.39 | 50.71 | 0.20 | 0.11 | 0.07 | 1.02 | 0.46 | 0.29 | 0.00 | 0.03 | 0.00  | 1.35 | 94.10 |
| GPS 405-1 AB-14 | Enamel  | 1324                          | 39.39 | 0.00 | 0.31 | 50.34 | 0.22 | 0.07 | 0.00 | 0.93 | 0.44 | 0.31 | 0.00 | 0.02 | 0.00  | 1.35 | 93.40 |
| GPS 405-1 AB-15 | Enamel  | 1422                          | 39.11 | 0.00 | 0.26 | 50.85 | 0.24 | 0.12 | 0.06 | 1.00 | 0.50 | 0.24 | 0.00 | 0.03 | 0.00  | 1.34 | 93.73 |
| GPS 405-1 AB-16 | Enamel  | 1520                          | 39.17 | 0.23 | 0.58 | 50.82 | 0.22 | 0.11 | 0.08 | 1.02 | 0.43 | 0.26 | 0.00 | 0.04 | 0.00  | 1.38 | 94.32 |
| GPS 405-1 AB-17 | Enamel  | 1618                          | 38.79 | 0.05 | 0.21 | 49.46 | 0.22 | 0.05 | 0.06 | 1.01 | 0.59 | 0.21 | 0.06 | 0.03 | 0.00  | 1.29 | 92.03 |
| GPS 405-1 AB-18 | Enamel  | 1716                          | 38.45 | 0.03 | 0.34 | 49.92 | 0.20 | 0.09 | 0.05 | 1.09 | 0.51 | 0.22 | 0.00 | 0.00 | 0.00  | 1.32 | 92.22 |
| GPS 405-1 AB-19 | Enamel  | 1814                          | 38.87 | 0.06 | 0.47 | 50.21 | 0.21 | 0.13 | 0.07 | 1.14 | 0.55 | 0.18 | 0.07 | 0.03 | 0.00  | 1.33 | 93.33 |
| GPS 405-1 AB-20 | Enamel  | 1912                          | 38.73 | 0.00 | 0.30 | 49.78 | 0.21 | 0.15 | 0.07 | 1.02 | 0.49 | 0.20 | 0.05 | 0.02 | 0.00  | 1.34 | 92.37 |
| GPS 405-1 AB-21 | Enamel  | 2010                          | 38.47 | 0.00 | 0.44 | 49.45 | 0.22 | 0.15 | 0.08 | 1.12 | 0.52 | 0.17 | 0.00 | 0.04 | 0.00  | 1.32 | 91.98 |
| GPS 405-1 AB-22 | Enamel  | 2108                          | 38.31 | 0.00 | 0.32 | 50.14 | 0.22 | 0.11 | 0.10 | 1.12 | 0.56 | 0.15 | 0.00 | 0.03 | 0.00  | 1.32 | 92.36 |
| GPS 405-1 AB-23 | Enamel  | 2206                          | 38.13 | 0.07 | 0.37 | 49.50 | 0.28 | 0.17 | 0.07 | 1.12 | 0.56 | 0.16 | 0.00 | 0.05 | 0.00  | 1.31 | 91.80 |
| GPS 405-1 AB-24 | Enamel  | 2304                          | 38.34 | 0.08 | 0.48 | 49.96 | 0.24 | 0.19 | 0.10 | 1.21 | 0.56 | 0.15 | 0.00 | 0.02 | 0.03  | 1.32 | 92.68 |
| GPS 405-1 AB-25 | Enamel  | 2402                          | 37.12 | 0.04 | 0.55 | 49.63 | 0.26 | 0.20 | 0.04 | 1.34 | 0.63 | 0.08 | 0.00 | 0.02 | 0.00  | 1.28 | 91.18 |
| GPS 405-1 AB-26 | Enamel  | 2500                          | 36.24 | 0.46 | 1.65 | 50.53 | 0.20 | 0.60 | 0.20 | 0.50 | 2.49 | 0.06 | 0.00 | 0.00 | 0.00  | 0.51 | 93.45 |
| GPS 405-1 AB-27 | Enamel  | 2598                          | 35.90 | 0.35 | 1.68 | 50.56 | 0.19 | 0.59 | 0.22 | 0.50 | 2.56 | 0.04 | 0.09 | 0.00 | 0.00  | 0.49 | 93.16 |
| GPS 405-1 AB-28 | Enamel  | 2696                          | 35.03 | 0.80 | 2.65 | 48.06 | 0.19 | 1.83 | 0.19 | 0.48 | 2.31 | 0.03 | 0.12 | 0.00 | 0.00  | 0.59 | 92.29 |
| GPS 405-1 AB-29 | Enamel  | 2794                          | 36.58 | 0.23 | 1.40 | 49.81 | 0.17 | 0.62 | 0.23 | 0.49 | 2.59 | 0.03 | 0.09 | 0.00 | 0.00  | 0.48 | 92.70 |
| GPS 405-1 AB-30 | Enamel  | 2892                          | 35.56 | 0.53 | 2.26 | 48.08 | 0.25 | 2.31 | 0.24 | 0.47 | 2.49 | 0.05 | 0.05 | 0.00 | 0.04  | 0.51 | 92.83 |

| GPS405-core     | <i>Hippopotamus sp</i> |               | Molar M3 frag Lake Albert, Warwire Fm. |      |      |       |      |      |      |      | Surface Find | E30° 52.925' |      | N001° 24.398' |       |      |       |
|-----------------|------------------------|---------------|----------------------------------------|------|------|-------|------|------|------|------|--------------|--------------|------|---------------|-------|------|-------|
| Sample          | Mineral                | Distance (µm) | P2O5                                   | SiO2 | FeO  | CaO   | MgO  | MnO  | SrO  | Na2O | F            | Cl           | SO3  | K2O           | Al2O3 | H2O  | Total |
| GPS 405-2 AB-01 | Enamel                 | 50            | 36.93                                  | 0.44 | 6.59 | 47.54 | 0.10 | 0.45 | 0.07 | 0.46 | 0.77         | 0.54         | 0.00 | 0.00          | 0.03  | 1.14 | 95.06 |
| GPS 405-2 AB-02 | Enamel                 | 175           | 40.21                                  | 0.00 | 0.37 | 51.50 | 0.20 | 0.16 | 0.07 | 0.61 | 0.34         | 0.59         | 0.07 | 0.00          | 0.00  | 1.36 | 95.48 |
| GPS 405-2 AB-03 | Enamel                 | 300           | 40.06                                  | 0.00 | 0.30 | 50.49 | 0.19 | 0.18 | 0.05 | 0.68 | 0.36         | 0.52         | 0.00 | 0.00          | 0.00  | 1.35 | 94.18 |
| GPS 405-2 AB-04 | Enamel                 | 425           | 39.93                                  | 0.00 | 0.36 | 50.65 | 0.22 | 0.13 | 0.08 | 0.72 | 0.36         | 0.49         | 0.00 | 0.00          | 0.00  | 1.36 | 94.30 |
| GPS 405-2 AB-05 | Enamel                 | 550           | 39.59                                  | 0.00 | 0.33 | 51.88 | 0.22 | 0.10 | 0.05 | 0.73 | 0.35         | 0.46         | 0.00 | 0.00          | 0.00  | 1.37 | 95.07 |
| GPS 405-2 AB-06 | Enamel                 | 675           | 39.51                                  | 0.00 | 0.25 | 50.82 | 0.24 | 0.14 | 0.08 | 0.79 | 0.39         | 0.41         | 0.07 | 0.02          | 0.00  | 1.36 | 94.07 |
| GPS 405-2 AB-07 | Enamel                 | 800           | 39.30                                  | 0.06 | 0.37 | 51.46 | 0.24 | 0.10 | 0.08 | 0.83 | 0.45         | 0.39         | 0.00 | 0.00          | 0.00  | 1.34 | 94.61 |
| GPS 405-2 AB-08 | Enamel                 | 925           | 39.70                                  | 0.00 | 0.34 | 51.57 | 0.24 | 0.11 | 0.07 | 0.89 | 0.45         | 0.33         | 0.00 | 0.00          | 0.00  | 1.36 | 95.07 |
| GPS 405-2 AB-09 | Enamel                 | 1050          | 39.24                                  | 0.06 | 0.31 | 51.77 | 0.21 | 0.05 | 0.08 | 0.86 | 0.54         | 0.32         | 0.00 | 0.00          | 0.00  | 1.32 | 94.75 |
| GPS 405-2 AB-10 | Enamel                 | 1175          | 39.12                                  | 0.06 | 0.26 | 51.33 | 0.21 | 0.11 | 0.10 | 0.90 | 0.49         | 0.30         | 0.00 | 0.02          | 0.00  | 1.34 | 94.24 |
| GPS 405-2 AB-11 | Enamel                 | 1300          | 39.36                                  | 0.00 | 0.31 | 50.55 | 0.21 | 0.11 | 0.04 | 0.88 | 0.48         | 0.27         | 0.00 | 0.00          | 0.00  | 1.34 | 93.56 |
| GPS 405-2 AB-12 | Enamel                 | 1425          | 39.07                                  | 0.03 | 0.27 | 50.23 | 0.23 | 0.09 | 0.09 | 0.98 | 0.52         | 0.25         | 0.00 | 0.03          | 0.00  | 1.32 | 93.10 |
| GPS 405-2 AB-13 | Enamel                 | 1550          | 39.04                                  | 0.00 | 0.32 | 50.19 | 0.24 | 0.07 | 0.07 | 1.10 | 0.48         | 0.23         | 0.00 | 0.03          | 0.00  | 1.35 | 93.10 |
| GPS 405-2 AB-14 | Enamel                 | 1675          | 38.84                                  | 0.00 | 0.28 | 49.83 | 0.22 | 0.11 | 0.07 | 1.00 | 0.41         | 0.22         | 0.00 | 0.03          | 0.00  | 1.37 | 92.38 |
| GPS 405-2 AB-15 | Enamel                 | 1800          | 37.99                                  | 0.08 | 0.30 | 49.46 | 0.23 | 0.08 | 0.10 | 1.10 | 0.46         | 0.20         | 0.00 | 0.00          | 0.00  | 1.33 | 91.33 |
| GPS 405-2 AB-16 | Enamel                 | 1925          | 38.25                                  | 0.00 | 0.34 | 49.36 | 0.22 | 0.12 | 0.13 | 1.09 | 0.44         | 0.21         | 0.18 | 0.00          | 0.00  | 1.35 | 91.67 |
| GPS 405-2 AB-17 | Enamel                 | 2050          | 38.17                                  | 0.00 | 0.31 | 49.94 | 0.21 | 0.10 | 0.07 | 1.04 | 0.47         | 0.19         | 0.00 | 0.00          | 0.00  | 1.34 | 91.83 |
| GPS 405-2 AB-18 | Enamel                 | 2175          | 37.33                                  | 0.24 | 0.67 | 50.14 | 0.25 | 0.08 | 0.07 | 1.12 | 0.46         | 0.18         | 0.00 | 0.03          | 0.00  | 1.34 | 91.93 |
| GPS 405-2 AB-19 | Enamel                 | 2300          | 37.32                                  | 0.05 | 0.39 | 49.60 | 0.24 | 0.16 | 0.07 | 1.12 | 0.47         | 0.16         | 0.05 | 0.03          | 0.00  | 1.33 | 90.98 |
| GPS 405-2 AB-20 | Enamel                 | 2425          | 37.42                                  | 0.04 | 0.33 | 49.45 | 0.24 | 0.17 | 0.10 | 1.12 | 0.51         | 0.16         | 0.00 | 0.00          | 0.00  | 1.31 | 90.84 |
| GPS 405-2 AB-21 | Enamel                 | 2550          | 37.58                                  | 0.00 | 0.32 | 49.87 | 0.27 | 0.16 | 0.09 | 1.24 | 0.56         | 0.14         | 0.00 | 0.03          | 0.00  | 1.30 | 91.55 |
| GPS 405-2 AB-22 | Enamel                 | 2675          | 36.73                                  | 0.04 | 0.37 | 49.78 | 0.24 | 0.16 | 0.08 | 1.26 | 0.67         | 0.11         | 0.00 | 0.02          | 0.00  | 1.25 | 90.70 |
| GPS 405-2 AB-23 | Enamel                 | 2800          | 36.97                                  | 0.07 | 0.46 | 49.65 | 0.26 | 0.11 | 0.08 | 1.21 | 0.56         | 0.11         | 0.00 | 0.02          | 0.00  | 1.30 | 90.79 |
| GPS 405-2 AB-24 | Enamel                 | 2925          | 34.58                                  | 0.38 | 1.53 | 48.61 | 0.25 | 1.77 | 0.24 | 0.46 | 2.35         | 0.07         | 0.08 | 0.00          | 0.00  | 0.56 | 90.87 |
| GPS 405-2 AB-25 | Enamel                 | 3050          | 33.41                                  | 1.08 | 2.51 | 48.32 | 0.21 | 0.52 | 0.19 | 0.45 | 2.45         | 0.03         | 0.08 | 0.00          | 0.05  | 0.52 | 89.80 |
| GPS 405-2 AB-26 | Enamel                 | 3175          | 34.72                                  | 0.42 | 1.35 | 49.67 | 0.19 | 0.59 | 0.20 | 0.45 | 2.57         | 0.02         | 0.08 | 0.02          | 0.00  | 0.48 | 90.77 |
| GPS 405-2 AB-27 | Enamel                 | 3300          | 34.85                                  | 0.27 | 1.44 | 48.96 | 0.19 | 0.68 | 0.19 | 0.47 | 2.58         | 0.03         | 0.11 | 0.00          | 0.00  | 0.47 | 90.23 |
| GPS 405-2 AB-28 | Enamel                 | 3425          | 34.84                                  | 0.37 | 1.44 | 49.79 | 0.21 | 0.58 | 0.23 | 0.39 | 2.49         | 0.03         | 0.05 | 0.00          | 0.00  | 0.51 | 90.94 |
| GPS 405-2 AB-29 | Enamel                 | 3550          | 34.19                                  | 0.44 | 1.48 | 45.89 | 0.20 | 0.69 | 0.22 | 0.47 | 2.56         | 0.02         | 0.00 | 0.00          | 0.00  | 0.46 | 86.61 |
| GPS 405-2 AB-30 | Enamel                 | 3675          | 34.59                                  | 0.33 | 1.46 | 49.78 | 0.21 | 0.68 | 0.23 | 0.44 | 2.67         | 0.02         | 0.00 | 0.00          | 0.00  | 0.43 | 90.85 |

## GPS421-core

*Hippopotamus sp*

Molar fragmer Lake Albert, Kagusa Mb.

Surface Find

E30° 18.836'

N0000° 59.652'

| Sample          | Mineral | Distance<br>( $\mu\text{m}$ ) | P2O5  | SiO2 | FeO  | CaO   | MgO  | MnO  | SrO  | Na2O | F    | Cl   | SO3  | K2O  | Al2O3 | H2O  | Total |
|-----------------|---------|-------------------------------|-------|------|------|-------|------|------|------|------|------|------|------|------|-------|------|-------|
| GPS 421-1 AB-01 | Enamel  | 50                            | 36.71 | 0.11 | 0.59 | 50.82 | 0.14 | 0.62 | 0.10 | 0.45 | 1.53 | 0.37 | 0.18 | 0.00 | 0.17  | 0.85 | 92.65 |
| GPS 421-1 AB-02 | Enamel  | 166                           | 36.37 | 0.16 | 0.47 | 51.03 | 0.15 | 0.80 | 0.13 | 0.39 | 1.58 | 0.43 | 0.22 | 0.00 | 0.15  | 0.82 | 92.69 |
| GPS 421-1 AB-03 | Enamel  | 282                           | 37.61 | 0.11 | 0.47 | 51.75 | 0.16 | 0.67 | 0.12 | 0.45 | 1.42 | 0.45 | 0.20 | 0.00 | 0.19  | 0.89 | 94.48 |
| GPS 421-1 AB-04 | Enamel  | 398                           | 37.39 | 0.34 | 1.14 | 50.98 | 0.17 | 0.64 | 0.13 | 0.44 | 1.39 | 0.47 | 0.34 | 0.00 | 0.25  | 0.90 | 94.59 |
| GPS 421-1 AB-05 | Enamel  | 514                           | 37.01 | 0.10 | 4.08 | 49.53 | 0.16 | 1.00 | 0.06 | 0.59 | 0.77 | 0.45 | 0.18 | 0.00 | 0.09  | 1.17 | 95.18 |
| GPS 421-1 AB-06 | Enamel  | 630                           | 39.30 | 0.04 | 1.39 | 52.05 | 0.19 | 0.39 | 0.07 | 0.58 | 0.75 | 0.49 | 0.18 | 0.03 | 0.00  | 1.20 | 96.67 |
| GPS 421-1 AB-07 | Enamel  | 746                           | 39.85 | 0.00 | 0.92 | 52.21 | 0.21 | 0.38 | 0.07 | 0.62 | 0.50 | 0.49 | 0.19 | 0.00 | 0.00  | 1.32 | 96.76 |
| GPS 421-1 AB-08 | Enamel  | 862                           | 39.29 | 0.00 | 1.12 | 51.84 | 0.23 | 0.28 | 0.05 | 0.66 | 0.51 | 0.44 | 0.20 | 0.00 | 0.00  | 1.32 | 95.93 |
| GPS 421-1 AB-09 | Enamel  | 978                           | 39.72 | 0.04 | 0.89 | 51.17 | 0.25 | 0.27 | 0.05 | 0.70 | 0.42 | 0.41 | 0.17 | 0.00 | 0.00  | 1.36 | 95.45 |
| GPS 421-1 AB-10 | Enamel  | 1094                          | 39.44 | 0.00 | 0.33 | 51.88 | 0.22 | 0.29 | 0.07 | 0.76 | 0.41 | 0.43 | 0.17 | 0.00 | 0.00  | 1.36 | 95.35 |
| GPS 421-1 AB-11 | Enamel  | 1210                          | 39.60 | 0.00 | 0.25 | 51.95 | 0.21 | 0.20 | 0.05 | 0.76 | 0.40 | 0.36 | 0.15 | 0.00 | 0.00  | 1.38 | 95.31 |
| GPS 421-1 AB-12 | Enamel  | 1326                          | 39.49 | 0.00 | 0.33 | 51.81 | 0.21 | 0.23 | 0.06 | 0.82 | 0.33 | 0.36 | 0.17 | 0.03 | 0.00  | 1.41 | 95.24 |
| GPS 421-1 AB-13 | Enamel  | 1442                          | 39.87 | 0.00 | 0.38 | 51.73 | 0.21 | 0.16 | 0.04 | 0.80 | 0.42 | 0.35 | 0.13 | 0.02 | 0.00  | 1.38 | 95.50 |
| GPS 421-1 AB-14 | Enamel  | 1558                          | 38.96 | 0.00 | 0.39 | 51.82 | 0.23 | 0.23 | 0.08 | 0.80 | 0.38 | 0.33 | 0.16 | 0.00 | 0.00  | 1.38 | 94.76 |
| GPS 421-1 AB-15 | Enamel  | 1674                          | 39.05 | 0.00 | 0.38 | 51.95 | 0.24 | 0.20 | 0.03 | 0.85 | 0.43 | 0.32 | 0.14 | 0.00 | 0.00  | 1.37 | 94.96 |
| GPS 421-1 AB-16 | Enamel  | 1790                          | 39.26 | 0.00 | 0.28 | 51.35 | 0.22 | 0.19 | 0.06 | 0.92 | 0.39 | 0.29 | 0.17 | 0.02 | 0.00  | 1.39 | 94.54 |
| GPS 421-1 AB-17 | Enamel  | 1906                          | 39.48 | 0.00 | 0.33 | 51.66 | 0.24 | 0.15 | 0.03 | 0.88 | 0.35 | 0.30 | 0.13 | 0.02 | 0.00  | 1.41 | 94.98 |
| GPS 421-1 AB-18 | Enamel  | 2022                          | 39.02 | 0.00 | 0.30 | 51.75 | 0.23 | 0.24 | 0.07 | 0.95 | 0.29 | 0.27 | 0.11 | 0.02 | 0.00  | 1.43 | 94.68 |
| GPS 421-1 AB-19 | Enamel  | 2138                          | 39.14 | 0.00 | 0.33 | 51.51 | 0.24 | 0.26 | 0.06 | 0.88 | 0.41 | 0.26 | 0.14 | 0.05 | 0.00  | 1.39 | 94.65 |
| GPS 421-1 AB-20 | Enamel  | 2254                          | 38.55 | 0.00 | 0.39 | 51.28 | 0.26 | 0.33 | 0.08 | 1.00 | 0.43 | 0.23 | 0.14 | 0.00 | 0.00  | 1.38 | 94.06 |
| GPS 421-1 AB-21 | Enamel  | 2370                          | 39.61 | 0.00 | 0.36 | 50.82 | 0.28 | 0.30 | 0.09 | 1.03 | 0.38 | 0.24 | 0.15 | 0.03 | 0.00  | 1.41 | 94.69 |
| GPS 421-1 AB-22 | Enamel  | 2486                          | 39.08 | 0.00 | 0.32 | 50.96 | 0.30 | 0.30 | 0.04 | 1.04 | 0.44 | 0.21 | 0.12 | 0.04 | 0.00  | 1.38 | 94.22 |
| GPS 421-1 AB-23 | Enamel  | 2602                          | 39.05 | 0.00 | 0.32 | 50.04 | 0.29 | 0.29 | 0.08 | 1.13 | 0.38 | 0.21 | 0.13 | 0.05 | 0.00  | 1.40 | 93.37 |
| GPS 421-1 AB-24 | Enamel  | 2718                          | 38.61 | 0.00 | 0.22 | 49.04 | 0.29 | 0.35 | 0.07 | 1.08 | 0.37 | 0.19 | 0.09 | 0.02 | 0.00  | 1.38 | 91.70 |
| GPS 421-1 AB-25 | Enamel  | 2834                          | 39.06 | 0.00 | 0.55 | 49.63 | 0.30 | 0.28 | 0.06 | 1.00 | 0.39 | 0.16 | 0.12 | 0.02 | 0.00  | 1.40 | 92.97 |
| GPS 421-1 AB-26 | Enamel  | 2950                          | 38.22 | 0.00 | 0.84 | 49.10 | 0.32 | 0.37 | 0.06 | 1.06 | 0.38 | 0.17 | 0.13 | 0.02 | 0.00  | 1.38 | 92.05 |
| GPS 421-1 AB-27 | Enamel  | 3066                          | 38.36 | 0.00 | 1.05 | 49.22 | 0.28 | 0.37 | 0.08 | 1.10 | 0.43 | 0.16 | 0.11 | 0.03 | 0.00  | 1.37 | 92.55 |
| GPS 421-1 AB-28 | Enamel  | 3182                          | 37.83 | 0.04 | 0.81 | 48.67 | 0.32 | 0.37 | 0.05 | 1.17 | 0.43 | 0.15 | 0.13 | 0.04 | 0.00  | 1.35 | 91.37 |
| GPS 421-1 AB-29 | Enamel  | 3298                          | 37.84 | 0.00 | 0.55 | 48.67 | 0.32 | 0.37 | 0.08 | 1.17 | 0.47 | 0.12 | 0.12 | 0.05 | 0.00  | 1.34 | 91.08 |
| GPS 421-1 AB-30 | Enamel  | 3414                          | 37.95 | 0.00 | 0.14 | 49.91 | 0.34 | 0.14 | 0.06 | 1.21 | 0.55 | 0.11 | 0.22 | 0.06 | 0.00  | 1.32 | 92.00 |



GPS421-core

*Hippopotamus sp*

Molar fragmer Lake Albert, Kagusa Mb.

Surface Find

E30° 18.836'

N0000° 59.652'

| Sample          | Mineral | Distance<br>( $\mu\text{m}$ ) | P2O5  | SiO2 | FeO  | CaO   | MgO  | MnO  | SrO  | Na2O | F    | Cl   | SO3  | K2O  | Al2O3 | H2O  | Total |
|-----------------|---------|-------------------------------|-------|------|------|-------|------|------|------|------|------|------|------|------|-------|------|-------|
| GPS 421-2 AB-01 | Enamel  | 50                            | 33.89 | 0.10 | 0.30 | 44.07 | 0.11 | 0.28 | 0.20 | 0.42 | 1.55 | 0.43 | 0.17 | 0.00 | 0.73  | 0.74 | 83.00 |
| GPS 421-2 AB-02 | Enamel  | 138                           | 38.56 | 0.07 | 0.57 | 48.01 | 0.12 | 0.64 | 0.23 | 0.44 | 1.56 | 0.41 | 0.16 | 0.00 | 0.83  | 0.83 | 92.42 |
| GPS 421-2 AB-03 | Enamel  | 226                           | 38.80 | 0.13 | 1.40 | 49.72 | 0.16 | 0.61 | 0.08 | 0.49 | 1.20 | 0.47 | 0.25 | 0.00 | 0.19  | 0.99 | 94.49 |
| GPS 421-2 AB-04 | Enamel  | 314                           | 38.38 | 0.19 | 1.28 | 49.19 | 0.20 | 0.38 | 0.11 | 0.47 | 1.29 | 0.41 | 0.35 | 0.00 | 0.16  | 0.96 | 93.38 |
| GPS 421-2 AB-05 | Enamel  | 402                           | 38.61 | 0.20 | 1.09 | 50.31 | 0.17 | 0.44 | 0.10 | 0.53 | 1.09 | 0.41 | 0.25 | 0.00 | 0.17  | 1.05 | 94.43 |
| GPS 421-2 AB-06 | Enamel  | 490                           | 38.48 | 0.60 | 1.29 | 48.50 | 0.21 | 0.43 | 0.12 | 0.56 | 1.01 | 0.43 | 0.22 | 0.03 | 0.25  | 1.07 | 93.20 |
| GPS 421-2 AB-07 | Enamel  | 578                           | 39.12 | 0.44 | 1.11 | 49.64 | 0.20 | 0.42 | 0.08 | 0.66 | 1.11 | 0.38 | 0.22 | 0.02 | 0.18  | 1.06 | 94.63 |
| GPS 421-2 AB-08 | Enamel  | 666                           | 38.91 | 0.09 | 0.59 | 50.13 | 0.17 | 0.50 | 0.07 | 0.64 | 1.07 | 0.39 | 0.25 | 0.00 | 0.16  | 1.06 | 94.04 |
| GPS 421-2 AB-09 | Enamel  | 754                           | 38.69 | 0.09 | 0.98 | 50.13 | 0.18 | 0.49 | 0.10 | 0.64 | 1.01 | 0.38 | 0.21 | 0.00 | 0.14  | 1.09 | 94.13 |
| GPS 421-2 AB-10 | Enamel  | 842                           | 38.90 | 0.07 | 0.71 | 49.79 | 0.17 | 0.56 | 0.08 | 0.63 | 1.07 | 0.35 | 0.19 | 0.03 | 0.11  | 1.07 | 93.73 |
| GPS 421-2 AB-11 | Enamel  | 930                           | 38.69 | 0.08 | 1.03 | 49.63 | 0.19 | 0.52 | 0.11 | 0.67 | 1.01 | 0.36 | 0.21 | 0.00 | 0.10  | 1.09 | 93.70 |
| GPS 421-2 AB-12 | Enamel  | 1018                          | 39.45 | 0.06 | 1.12 | 49.57 | 0.20 | 0.41 | 0.08 | 0.68 | 0.98 | 0.34 | 0.23 | 0.00 | 0.10  | 1.12 | 94.35 |
| GPS 421-2 AB-13 | Enamel  | 1106                          | 39.20 | 0.06 | 1.10 | 49.14 | 0.16 | 0.45 | 0.10 | 0.72 | 0.89 | 0.32 | 0.25 | 0.00 | 0.11  | 1.16 | 93.68 |
| GPS 421-2 AB-14 | Enamel  | 1194                          | 39.10 | 0.05 | 1.17 | 49.76 | 0.18 | 0.45 | 0.10 | 0.71 | 0.88 | 0.32 | 0.23 | 0.00 | 0.12  | 1.16 | 94.23 |
| GPS 421-2 AB-15 | Enamel  | 1282                          | 38.78 | 0.04 | 0.73 | 50.36 | 0.18 | 0.42 | 0.09 | 0.76 | 0.87 | 0.31 | 0.23 | 0.00 | 0.08  | 1.17 | 94.02 |
| GPS 421-2 AB-16 | Enamel  | 1370                          | 38.77 | 0.06 | 1.06 | 49.22 | 0.18 | 0.40 | 0.09 | 0.78 | 0.98 | 0.29 | 0.26 | 0.04 | 0.08  | 1.12 | 93.32 |
| GPS 421-2 AB-17 | Enamel  | 1458                          | 39.40 | 0.07 | 0.79 | 50.33 | 0.20 | 0.44 | 0.08 | 0.71 | 1.02 | 0.29 | 0.24 | 0.00 | 0.06  | 1.12 | 94.74 |
| GPS 421-2 AB-18 | Enamel  | 1546                          | 39.28 | 0.09 | 0.59 | 49.82 | 0.22 | 0.38 | 0.10 | 0.71 | 1.00 | 0.29 | 0.26 | 0.00 | 0.07  | 1.12 | 93.93 |
| GPS 421-2 AB-19 | Enamel  | 1634                          | 38.86 | 0.04 | 0.50 | 50.77 | 0.18 | 0.41 | 0.08 | 0.70 | 0.99 | 0.28 | 0.27 | 0.02 | 0.06  | 1.13 | 94.29 |
| GPS 421-2 AB-20 | Enamel  | 1722                          | 38.49 | 0.06 | 0.53 | 50.74 | 0.21 | 0.36 | 0.11 | 0.76 | 0.97 | 0.28 | 0.24 | 0.02 | 0.04  | 1.13 | 93.94 |
| GPS 421-2 AB-21 | Enamel  | 1810                          | 39.83 | 0.06 | 0.57 | 50.22 | 0.22 | 0.37 | 0.08 | 0.87 | 0.91 | 0.26 | 0.21 | 0.02 | 0.05  | 1.18 | 94.85 |
| GPS 421-2 AB-22 | Enamel  | 1898                          | 38.84 | 0.09 | 0.49 | 50.10 | 0.20 | 0.38 | 0.09 | 0.74 | 1.04 | 0.25 | 0.26 | 0.00 | 0.05  | 1.11 | 93.64 |
| GPS 421-2 AB-23 | Enamel  | 1986                          | 38.62 | 0.08 | 0.52 | 49.90 | 0.21 | 0.37 | 0.11 | 0.74 | 1.16 | 0.23 | 0.27 | 0.00 | 0.04  | 1.06 | 93.30 |
| GPS 421-2 AB-24 | Enamel  | 2074                          | 38.49 | 0.13 | 0.48 | 50.47 | 0.26 | 0.34 | 0.11 | 0.89 | 0.88 | 0.22 | 0.30 | 0.02 | 0.06  | 1.18 | 93.82 |
| GPS 421-2 AB-25 | Enamel  | 2162                          | 38.26 | 0.08 | 0.41 | 49.93 | 0.19 | 0.32 | 0.09 | 0.81 | 1.19 | 0.21 | 0.33 | 0.02 | 0.04  | 1.05 | 92.92 |
| GPS 421-2 AB-26 | Enamel  | 2250                          | 38.13 | 0.45 | 1.05 | 48.69 | 0.25 | 0.29 | 0.10 | 0.85 | 1.06 | 0.21 | 0.26 | 0.03 | 0.08  | 1.10 | 92.54 |
| GPS 421-2 AB-27 | Enamel  | 2338                          | 38.07 | 0.17 | 0.47 | 49.64 | 0.23 | 0.28 | 0.09 | 0.94 | 1.03 | 0.20 | 0.31 | 0.02 | 0.06  | 1.11 | 92.61 |
| GPS 421-2 AB-28 | Enamel  | 2426                          | 38.86 | 0.09 | 0.64 | 49.61 | 0.21 | 0.29 | 0.08 | 0.89 | 0.91 | 0.18 | 0.20 | 0.05 | 0.05  | 1.18 | 93.24 |
| GPS 421-2 AB-29 | Enamel  | 2514                          | 37.76 | 0.08 | 2.02 | 48.63 | 0.25 | 0.43 | 0.09 | 0.88 | 0.83 | 0.17 | 0.18 | 0.02 | 0.11  | 1.19 | 92.64 |
| GPS 421-2 AB-30 | Enamel  | 2602                          | 37.77 | 0.19 | 1.90 | 48.49 | 0.26 | 0.38 | 0.10 | 0.84 | 0.97 | 0.18 | 0.25 | 0.02 | 0.16  | 1.13 | 92.66 |

Cat# 051-06 *Hippopotamus sp*

Molar fragment

Lake Albert, Nkondo Fm.

Surface Find

E30.9098407

N1.4331446

|        | Mineral | Distance<br>( $\mu\text{m}$ ) | P2O5  | SiO2 | FeO  | CaO   | MgO  | MnO  | SrO  | Na2O | F    | Cl   | SO3  | K2O  | Al2O3 | Total |
|--------|---------|-------------------------------|-------|------|------|-------|------|------|------|------|------|------|------|------|-------|-------|
| 1AB-01 | Enamel  | 0                             | 34.37 | 0.00 | 0.11 | 44.98 | 0.14 | 0.00 | 0.00 | 0.43 | 1.16 | 0.39 | 0.12 | 0.02 | 0.01  | 81.72 |
| 1AB-02 | Enamel  | 120                           | 39.05 | 0.06 | 0.07 | 52.33 | 0.23 | 0.00 | 0.05 | 0.61 | 0.86 | 0.44 | 0.18 | 0.05 | 0.02  | 93.95 |
| 1AB-03 | Enamel  | 240                           | 39.87 | 0.00 | 0.00 | 52.48 | 0.20 | 0.00 | 0.09 | 0.59 | 0.53 | 0.54 | 0.16 | 0.01 | 0.04  | 94.51 |
| 1AB-04 | Enamel  | 360                           | 39.05 | 0.01 | 0.04 | 52.47 | 0.19 | 0.00 | 0.11 | 0.67 | 0.30 | 0.56 | 0.20 | 0.02 | 0.01  | 93.63 |
| 1AB-05 | Enamel  | 480                           | 39.84 | 0.05 | 0.09 | 52.16 | 0.15 | 0.00 | 0.03 | 0.62 | 0.32 | 0.54 | 0.16 | 0.02 | 0.04  | 94.00 |
| 1AB-06 | Enamel  | 600                           | 39.22 | 0.02 | 0.06 | 51.74 | 0.16 | 0.03 | 0.08 | 0.77 | 0.32 | 0.49 | 0.20 | 0.03 | 0.00  | 93.12 |
| 1AB-07 | Enamel  | 720                           | 39.66 | 0.00 | 0.00 | 52.24 | 0.19 | 0.04 | 0.08 | 0.71 | 0.42 | 0.44 | 0.14 | 0.03 | 0.01  | 93.98 |
| 1AB-08 | Enamel  | 840                           | 39.86 | 0.04 | 0.01 | 52.18 | 0.20 | 0.00 | 0.09 | 0.80 | 0.38 | 0.42 | 0.11 | 0.01 | 0.03  | 94.14 |
| 1AB-09 | Enamel  | 960                           | 39.49 | 0.00 | 0.04 | 51.87 | 0.20 | 0.07 | 0.09 | 0.77 | 0.46 | 0.37 | 0.12 | 0.01 | 0.02  | 93.51 |
| 1AB-10 | Enamel  | 1080                          | 38.89 | 0.01 | 0.01 | 51.60 | 0.17 | 0.06 | 0.05 | 0.74 | 0.53 | 0.33 | 0.13 | 0.03 | 0.01  | 92.54 |
| 1AB-11 | Enamel  | 1200                          | 39.14 | 0.05 | 0.02 | 51.59 | 0.19 | 0.03 | 0.08 | 0.75 | 0.59 | 0.32 | 0.14 | 0.01 | 0.03  | 92.94 |
| 1AB-12 | Enamel  | 1320                          | 38.38 | 0.05 | 0.00 | 50.26 | 0.19 | 0.04 | 0.10 | 0.69 | 0.83 | 0.27 | 0.14 | 0.03 | 0.01  | 90.99 |
| 1AB-13 | Enamel  | 1440                          | 37.35 | 0.03 | 0.00 | 49.30 | 0.16 | 0.02 | 0.05 | 0.57 | 1.17 | 0.23 | 0.15 | 0.00 | 0.02  | 89.04 |
| 1AB-14 | Enamel  | 1560                          | 37.48 | 0.00 | 0.00 | 49.63 | 0.17 | 0.08 | 0.09 | 0.49 | 1.51 | 0.22 | 0.15 | 0.02 | 0.04  | 89.89 |
| 1AB-15 | Enamel  | 1680                          | 36.96 | 0.05 | 0.05 | 48.48 | 0.11 | 0.21 | 0.08 | 0.43 | 1.67 | 0.17 | 0.16 | 0.00 | 0.02  | 88.39 |
| 1AB-16 | Enamel  | 1800                          | 36.31 | 0.04 | 0.01 | 48.37 | 0.12 | 0.10 | 0.06 | 0.47 | 1.82 | 0.16 | 0.15 | 0.03 | 0.00  | 87.64 |
| 1AB-17 | Enamel  | 1920                          | 36.68 | 0.00 | 0.02 | 47.84 | 0.12 | 0.35 | 0.07 | 0.39 | 1.90 | 0.14 | 0.18 | 0.01 | 0.02  | 87.73 |
| 1AB-18 | Enamel  | 2040                          | 35.36 | 0.00 | 0.04 | 47.16 | 0.08 | 0.72 | 0.12 | 0.45 | 1.88 | 0.13 | 0.13 | 0.01 | 0.00  | 86.07 |
| 1AB-19 | Enamel  | 2160                          | 35.80 | 0.06 | 0.04 | 47.35 | 0.11 | 0.49 | 0.09 | 0.37 | 1.98 | 0.14 | 0.16 | 0.03 | 0.02  | 86.63 |
| 1AB-20 | Enamel  | 2280                          | 34.35 | 0.05 | 0.10 | 47.32 | 0.08 | 0.66 | 0.09 | 0.32 | 2.07 | 0.13 | 0.21 | 0.01 | 0.04  | 85.42 |
| 1AB-21 | Enamel  | 2400                          | 34.99 | 0.03 | 0.04 | 48.10 | 0.08 | 0.55 | 0.12 | 0.35 | 2.23 | 0.11 | 0.19 | 0.01 | 0.01  | 86.81 |
| 1AB-22 | Enamel  | 2520                          | 36.78 | 0.04 | 0.00 | 50.10 | 0.09 | 0.23 | 0.08 | 0.36 | 2.48 | 0.10 | 0.15 | 0.00 | 0.06  | 90.46 |
| 1AB-23 | Enamel  | 2640                          | 28.15 | 0.03 | 0.04 | 37.39 | 0.07 | 0.07 | 0.08 | 0.18 | 2.31 | 0.12 | 0.39 | 0.00 | 0.01  | 68.86 |
| 1AB-24 | Enamel  | 2760                          | 24.61 | 0.04 | 0.04 | 41.31 | 0.13 | 0.06 | 0.08 | 0.21 | 2.19 | 0.09 | 0.36 | 0.00 | 0.12  | 69.24 |
| 1AB-25 | Enamel  | 2880                          | 0.08  | 0.06 | 0.00 | 0.21  | 0.01 | 0.02 | 0.00 | 0.01 | 0.00 | 0.26 | 0.06 | 0.00 | 0.13  | 0.85  |
| 1AB-26 | Enamel  | 3000                          | 0.09  | 0.10 | 0.00 | 53.79 | 0.44 | 0.20 | 0.02 | 0.04 | 0.00 | 0.01 | 0.06 | 0.00 | 0.31  | 55.05 |
| 1AB-27 | Dentin  | 3120                          | 28.36 | 0.02 | 0.15 | 39.56 | 0.06 | 1.84 | 0.12 | 0.20 | 2.50 | 0.07 | 0.51 | 0.00 | 0.02  | 73.42 |
| 1AB-28 | Dentin  | 3240                          | 29.21 | 0.07 | 0.11 | 39.80 | 0.05 | 0.75 | 0.08 | 0.20 | 2.71 | 0.07 | 0.47 | 0.00 | 0.03  | 73.55 |
| 1AB-29 | Dentin  | 3360                          | 29.02 | 0.06 | 0.13 | 40.94 | 0.04 | 0.05 | 0.06 | 0.18 | 2.64 | 0.07 | 0.48 | 0.01 | 0.04  | 73.72 |
| 1AB-30 | Dentin  | 3480                          | 29.71 | 0.07 | 0.00 | 41.03 | 0.04 | 0.07 | 0.10 | 0.20 | 2.62 | 0.08 | 0.50 | 0.00 | 0.04  | 74.47 |

| Cat# 5306 <i>Hippopotamus sp</i> |         |                               | Molar fragment |      |       |       |      |      |      | Lake Albert, Kaiso Village Fm. |      |      | Surface Find |      | E30.96475396 |       | N1.52576142 |  |
|----------------------------------|---------|-------------------------------|----------------|------|-------|-------|------|------|------|--------------------------------|------|------|--------------|------|--------------|-------|-------------|--|
| Profile                          | Mineral | Distance<br>( $\mu\text{m}$ ) | P2O5           | SiO2 | FeO   | CaO   | MgO  | MnO  | SrO  | Na2O                           | F    | Cl   | SO3          | K2O  | Al2O3        | Total |             |  |
| 1AB-01                           | Cement  | 50                            | 33.57          | 1.02 | 7.25  | 44.70 | 0.24 | 0.34 |      | 0.43                           | 2.90 | 0.01 | 0.25         | 0.03 | 0.66         | 91.40 |             |  |
| 1AB-02                           | Cement  | 107                           | 33.77          | 0.58 | 5.73  | 47.18 | 0.22 | 0.46 | 0.14 | 0.40                           | 2.59 | 0.02 | 0.29         | 0.01 | 0.56         | 91.95 |             |  |
| 1AB-03                           | Cement  | 214                           | 32.58          | 1.12 | 6.46  | 45.53 | 0.23 | 0.52 | 0.15 | 0.41                           | 2.33 | 0.03 | 0.39         | 0.04 | 0.97         | 90.76 |             |  |
| 1AB-04                           | Cement  | 321                           | 33.97          | 0.65 | 7.27  | 46.33 | 0.24 | 0.33 | 0.12 | 0.47                           | 2.41 | 0.03 | 0.30         | 0.01 | 0.52         | 92.65 |             |  |
| 1AB-05                           | Cement  | 428                           | 34.38          | 1.82 | 3.77  | 47.86 | 0.24 | 0.44 | 0.18 | 0.41                           | 2.58 | 0.02 | 0.45         | 0.12 | 0.70         | 92.98 |             |  |
| 1AB-06                           | Enamel  | 535                           | 38.38          | 0.09 | 1.77  | 49.78 | 0.32 | 0.19 | 0.09 | 0.77                           | 0.42 | 0.39 | 0.14         | 0.01 | 0.03         | 92.39 |             |  |
| 1AB-07                           | Enamel  | 642                           | 38.49          | 0.07 | 1.57  | 49.92 | 0.31 | 0.09 | 0.11 | 0.89                           | 0.40 | 0.39 | 0.12         | 0.04 | 0.09         | 92.51 |             |  |
| 1AB-08                           | Enamel  | 749                           | 38.54          | 0.21 | 1.79  | 49.70 | 0.22 | 0.64 | 0.07 | 0.88                           | 0.36 | 0.37 | 0.12         | 0.03 | 0.09         | 93.02 |             |  |
| 1AB-09                           | Enamel  | 856                           | 38.26          | 0.19 | 2.14  | 50.27 | 0.18 | 0.18 | 0.11 | 0.91                           | 0.40 | 0.38 | 0.11         | 0.03 | 0.05         | 93.22 |             |  |
| 1AB-10                           | Enamel  | 963                           | 38.67          | 0.10 | 1.78  | 50.17 | 0.16 | 0.06 | 0.06 | 0.77                           | 0.32 | 0.43 | 0.13         | 0.01 | 0.04         | 92.68 |             |  |
| 1AB-11                           | Enamel  | 1070                          | 38.25          | 0.14 | 2.32  | 50.19 | 0.19 | 0.03 | 0.05 | 0.88                           | 0.28 | 0.41 | 0.11         | 0.01 | 0.02         | 92.87 |             |  |
| 1AB-12                           | Enamel  | 1177                          | 38.46          | 0.04 | 1.32  | 50.84 | 0.18 | 0.09 | 0.07 | 0.74                           | 0.28 | 0.41 | 0.08         | 0.00 | 0.02         | 92.52 |             |  |
| 1AB-13                           | Enamel  | 1284                          | 37.99          | 0.05 | 1.33  | 50.81 | 0.17 | 0.09 | 0.03 | 0.79                           | 0.22 | 0.41 | 0.13         | 0.01 | 0.00         | 92.03 |             |  |
| 1AB-14                           | Enamel  | 1391                          | 38.15          | 0.06 | 1.29  | 50.48 | 0.21 | 0.13 | 0.04 | 0.86                           | 0.19 | 0.38 | 0.09         | 0.01 | 0.02         | 91.90 |             |  |
| 1AB-15                           | Enamel  | 1498                          | 38.86          | 0.03 | 0.62  | 50.61 | 0.25 | 0.06 | 0.02 | 0.91                           | 0.17 | 0.35 | 0.06         | 0.01 | 0.00         | 91.98 |             |  |
| 1AB-16                           | Enamel  | 1605                          | 38.04          | 0.00 | 0.59  | 50.71 | 0.28 | 0.08 | 0.09 | 1.02                           | 0.13 | 0.35 | 0.17         | 0.02 | 0.03         | 91.52 |             |  |
| 1AB-17                           | Enamel  | 1712                          | 37.97          | 0.03 | 0.58  | 50.47 | 0.26 | 0.09 | 0.03 | 0.89                           | 0.09 | 0.33 | 0.16         | 0.03 | 0.00         | 90.92 |             |  |
| 1AB-18                           | Enamel  | 1819                          | 37.71          | 0.02 | 0.55  | 50.17 | 0.25 | 0.04 | 0.11 | 0.97                           | 0.21 | 0.27 | 0.19         | 0.01 | 0.01         | 90.52 |             |  |
| 1AB-19                           | Enamel  | 1926                          | 36.89          | 0.03 | 0.40  | 50.27 | 0.25 | 0.06 | 0.05 | 1.02                           | 0.17 | 0.27 | 0.21         | 0.01 | 0.02         | 89.64 |             |  |
| 1AB-20                           | Enamel  | 2033                          | 38.42          | 0.03 | 0.26  | 50.18 | 0.31 | 0.07 | 0.06 | 1.04                           | 0.26 | 0.24 | 0.23         | 0.03 | 0.01         | 91.14 |             |  |
| 1AB-21                           | Enamel  | 2140                          | 37.19          | 0.00 | 0.17  | 50.01 | 0.31 | 0.06 | 0.06 | 1.12                           | 0.20 | 0.20 | 0.30         | 0.05 | 0.01         | 89.68 |             |  |
| 1AB-22                           | Enamel  | 2247                          | 37.13          | 0.04 | 0.02  | 49.74 | 0.36 | 0.07 | 0.05 | 1.18                           | 0.28 | 0.19 | 0.40         | 0.03 | 0.00         | 89.49 |             |  |
| 1AB-23                           | Enamel  | 2354                          | 37.23          | 0.00 | 0.02  | 50.12 | 0.31 | 0.04 | 0.04 | 1.18                           | 0.36 | 0.17 | 0.38         | 0.04 | 0.00         | 89.88 |             |  |
| 1AB-24                           | dentin  | 2461                          | 29.75          | 0.79 | 13.01 | 42.77 | 0.27 | 0.27 | 0.16 | 0.56                           | 1.83 | 0.05 | 0.41         | 0.01 | 0.03         | 89.89 |             |  |
| 1AB-25                           | dentin  | 2568                          | 27.28          | 1.04 | 17.26 | 39.31 | 0.25 | 0.37 | 0.09 | 0.49                           | 1.67 | 0.02 | 0.35         | 0.00 | 0.94         | 89.05 |             |  |
| 1AB-26                           | dentin  | 2675                          | 28.82          | 0.85 | 14.87 | 41.39 | 0.23 | 0.36 | 0.11 | 0.49                           | 1.78 | 0.01 | 0.35         | 0.00 | 0.00         | 89.26 |             |  |
| 1AB-27                           | dentin  | 2782                          | 30.36          | 0.73 | 12.32 | 43.02 | 0.22 | 0.34 | 0.07 | 0.53                           | 1.98 | 0.01 | 0.31         | 0.00 | 0.01         | 89.90 |             |  |
| 1AB-28                           | dentin  | 2889                          | 30.59          | 0.64 | 10.78 | 44.23 | 0.24 | 1.07 | 0.08 | 0.50                           | 1.96 | 0.02 | 0.35         | 0.00 | 0.00         | 90.47 |             |  |
| 1AB-29                           | dentin  | 2996                          | 30.53          | 0.66 | 11.63 | 43.80 | 0.20 | 0.42 | 0.11 | 0.47                           | 1.88 | 0.02 | 0.37         | 0.00 | 0.03         | 90.11 |             |  |
| 1AB-30                           | dentin  | 3103                          | 30.66          | 0.75 | 11.27 | 43.72 | 0.21 | 0.46 | 0.13 | 0.48                           | 1.96 | 0.02 | 0.37         | 0.00 | 0.04         | 90.06 |             |  |

| Cat# 5306 <i>Hippopotamus sp</i> |         |               | Molar fragment |      |       |       |      |       |      | Lake Albert, Kaiso Village Fm. |      |      | Surface Find |      | E30.96475396 |       | N1.52576142 |  |
|----------------------------------|---------|---------------|----------------|------|-------|-------|------|-------|------|--------------------------------|------|------|--------------|------|--------------|-------|-------------|--|
| Profile                          | Mineral | Distance (µm) | P2O5           | SiO2 | FeO   | CaO   | MgO  | MnO   | SrO  | Na2O                           | F    | Cl   | SO3          | K2O  | Al2O3        | Total |             |  |
| 4AB-01                           | Dentin  | 50            | 26.04          | 1.16 | 21.62 | 36.32 | 0.24 | 0.53  | 0.04 | 0.41                           | 1.69 | 0.00 | 0.23         | 0.00 | 0.13         | 88.39 |             |  |
| 4AB-02                           | Dentin  | 117           | 27.23          | 1.11 | 19.23 | 37.59 | 0.25 | 0.67  | 0.08 | 0.42                           | 1.78 | 0.00 | 0.26         | 0.02 | 0.06         | 88.70 |             |  |
| 4AB-03                           | Dentin  | 234           | 25.83          | 1.18 | 20.92 | 35.96 | 0.30 | 1.08  | 0.13 | 0.40                           | 1.67 | 0.01 | 0.25         | 0.02 | 0.15         | 87.88 |             |  |
| 4AB-04                           | Dentin  | 351           | 25.25          | 1.17 | 21.56 | 35.92 | 0.27 | 0.64  | 0.07 | 0.30                           | 1.80 | 0.01 | 0.22         | 0.01 | 0.29         | 87.51 |             |  |
| 4AB-05                           | Dentin  | 468           | 30.27          | 0.78 | 12.46 | 42.63 | 0.25 | 0.49  | 0.10 | 0.46                           | 2.05 | 0.02 | 0.40         | 0.00 | 0.11         | 90.02 |             |  |
| 4AB-06                           | Enamel  | 585           | 37.71          | 0.08 | 0.69  | 49.66 | 0.27 | 0.11  | 0.02 | 1.14                           | 0.28 | 0.19 | 0.12         | 0.04 | 0.00         | 90.32 |             |  |
| 4AB-07                           | Enamel  | 702           | 38.37          | 0.04 | 0.11  | 50.27 | 0.33 | 0.01  | 0.09 | 1.01                           | 0.29 | 0.25 | 0.25         | 0.02 | 0.00         | 91.05 |             |  |
| 4AB-08                           | Enamel  | 819           | 37.83          | 0.01 | 0.10  | 50.53 | 0.32 | 0.04  | 0.04 | 1.00                           | 0.29 | 0.28 | 0.27         | 0.01 | 0.01         | 90.72 |             |  |
| 4AB-09                           | Enamel  | 936           | 38.14          | 0.01 | 0.34  | 50.15 | 0.29 | 0.07  | 0.08 | 1.00                           | 0.19 | 0.32 | 0.19         | 0.01 | 0.02         | 90.83 |             |  |
| 4AB-10                           | Enamel  | 1053          | 38.56          | 0.03 | 0.67  | 50.17 | 0.26 | 0.09  | 0.06 | 0.86                           | 0.16 | 0.35 | 0.17         | 0.04 | 0.01         | 91.44 |             |  |
| 4AB-11                           | Enamel  | 1170          | 38.48          | 0.05 | 1.10  | 50.13 | 0.20 | 0.14  | 0.09 | 0.91                           | 0.14 | 0.38 | 0.14         | 0.02 | 0.01         | 91.80 |             |  |
| 4AB-12                           | Enamel  | 1287          | 38.25          | 0.06 | 1.22  | 49.78 | 0.19 | 0.06  | 0.05 | 0.89                           | 0.10 | 0.40 | 0.12         | 0.02 | 0.02         | 91.15 |             |  |
| 4AB-13                           | Enamel  | 1404          | 38.40          | 0.09 | 1.66  | 50.26 | 0.22 | 0.27  | 0.07 | 0.76                           | 0.13 | 0.44 | 0.12         | 0.01 | 0.01         | 92.45 |             |  |
| 4AB-14                           | Enamel  | 1521          | 37.88          | 0.15 | 2.13  | 50.39 | 0.21 | 0.28  | 0.03 | 0.68                           | 0.14 | 0.46 | 0.19         | 0.00 | 0.01         | 92.55 |             |  |
| 4AB-15                           | Enamel  | 1638          | 38.09          | 0.08 | 1.61  | 50.29 | 0.22 | 0.05  | 0.06 | 0.78                           | 0.22 | 0.50 | 0.21         | 0.01 | 0.00         | 92.11 |             |  |
| 4AB-16                           | Enamel  | 1755          | 38.99          | 0.06 | 0.80  | 50.96 | 0.21 | 0.04  | 0.07 | 0.63                           | 0.19 | 0.56 | 0.25         | 0.01 | 0.02         | 92.79 |             |  |
| 4AB-17                           | Cement  | 1872          | 29.97          | 0.66 | 12.53 | 43.23 | 0.23 | 0.53  | 0.12 | 0.45                           | 2.11 | 0.03 | 0.71         | 0.01 | 0.02         | 90.58 |             |  |
| 4AB-18                           | Cement  | 1989          | 1.40           | 3.00 | 55.84 | 0.78  | 0.70 | 10.23 | 0.07 | 0.37                           | 0.00 | 0.06 | 0.12         | 0.07 | 0.31         | 72.94 |             |  |
| 4AB-19                           | Cement  | 2106          | 33.36          | 0.37 | 6.81  | 47.88 | 0.25 | 0.28  | 0.13 | 0.46                           | 2.35 | 0.02 | 0.80         | 0.00 | 0.02         | 92.73 |             |  |
| 4AB-20                           | Enamel  | 2223          | 37.68          | 0.09 | 1.54  | 49.10 | 0.23 | 0.19  | 0.07 | 0.99                           | 0.35 | 0.34 | 0.21         | 0.03 | 0.00         | 90.81 |             |  |
| 4AB-21                           | Enamel  | 2340          | 39.26          | 0.01 | 0.55  | 50.00 | 0.32 | 0.09  | 0.06 | 0.87                           | 0.28 | 0.36 | 0.08         | 0.01 | 0.00         | 91.89 |             |  |
| 4AB-22                           | Enamel  | 2457          | 38.66          | 0.04 | 0.31  | 50.48 | 0.27 | 0.11  | 0.09 | 0.86                           | 0.26 | 0.42 | 0.11         | 0.03 | 0.00         | 91.63 |             |  |
| 4AB-23                           | Enamel  | 2574          | 38.89          | 0.03 | 0.76  | 50.87 | 0.23 | 0.08  | 0.07 | 0.75                           | 0.14 | 0.44 | 0.11         | 0.05 | 0.01         | 92.41 |             |  |
| 4AB-24                           | Enamel  | 2691          | 37.99          | 0.07 | 0.79  | 50.62 | 0.21 | 0.11  | 0.07 | 0.95                           | 0.22 | 0.42 | 0.13         | 0.00 | 0.01         | 91.59 |             |  |
| 4AB-25                           | Enamel  | 2808          | 38.70          | 0.08 | 0.85  | 50.04 | 0.23 | 0.10  | 0.05 | 0.96                           | 0.19 | 0.36 | 0.11         | 0.00 | 0.01         | 91.68 |             |  |
| 4AB-26                           | Enamel  | 2925          | 38.56          | 0.04 | 0.44  | 50.79 | 0.25 | 0.10  | 0.05 | 0.93                           | 0.15 | 0.35 | 0.14         | 0.04 | 0.02         | 91.85 |             |  |
| 4AB-27                           | Enamel  | 3042          | 37.52          | 0.00 | 0.18  | 50.67 | 0.30 | 0.09  | 0.07 | 1.05                           | 0.25 | 0.27 | 0.17         | 0.03 | 0.00         | 90.61 |             |  |
| 4AB-28                           | Enamel  | 3159          | 37.42          | 0.00 | 0.14  | 50.18 | 0.30 | 0.04  | 0.07 | 1.07                           | 0.28 | 0.23 | 0.25         | 0.03 | 0.02         | 90.03 |             |  |
| 4AB-29                           | Dentin  | 3276          | 34.57          | 0.35 | 6.92  | 46.05 | 0.23 | 0.36  | 0.15 | 0.73                           | 1.32 | 0.08 | 0.14         | 0.02 | 0.03         | 90.94 |             |  |
| 4AB-30                           | Dentin  | 3393          | 30.85          | 0.73 | 11.73 | 43.61 | 0.24 | 0.63  | 0.09 | 0.47                           | 2.29 | 0.01 | 0.42         | 0.01 | 0.14         | 91.23 |             |  |

| Cat# 5306 <i>Hippopotamus sp</i> |         |               | Molar fragment |      |       |       |      |      |      | Lake Albert, Kaiso Village Fm. |      |      | Surface Find |      | E30.96475396 |       | N1.52576142 |  |
|----------------------------------|---------|---------------|----------------|------|-------|-------|------|------|------|--------------------------------|------|------|--------------|------|--------------|-------|-------------|--|
| Profile                          | Mineral | Distance (µm) | P2O5           | SiO2 | FeO   | CaO   | MgO  | MnO  | SrO  | Na2O                           | F    | Cl   | SO3          | K2O  | Al2O3        | Total |             |  |
| 5AB-01                           | Dentin  | 60.5          | 22.20          | 1.65 | 27.95 | 30.84 | 0.25 | 1.08 | 0.02 | 0.36                           | 1.32 | 0.01 | 0.21         | 0.01 | 0.02         | 85.93 |             |  |
| 5AB-02                           | Dentin  | 121           | 23.06          | 1.60 | 27.36 | 31.62 | 0.28 | 0.99 | 0.08 | 0.38                           | 1.40 | 0.01 | 0.23         | 0.03 | 0.00         | 87.02 |             |  |
| 5AB-03                           | Dentin  | 242           | 28.40          | 0.92 | 16.16 | 40.34 | 0.26 | 0.69 | 0.11 | 0.49                           | 1.88 | 0.03 | 0.33         | 0.02 | 0.01         | 89.63 |             |  |
| 5AB-04                           | Enamel  | 363           | 37.07          | 0.03 | 0.96  | 49.34 | 0.32 | 0.15 | 0.01 | 1.12                           | 0.40 | 0.16 | 0.24         | 0.05 | 0.00         | 89.84 |             |  |
| 5AB-05                           | Enamel  | 484           | 38.10          | 0.04 | 0.40  | 49.67 | 0.34 | 0.12 | 0.08 | 1.12                           | 0.31 | 0.20 | 0.26         | 0.01 | 0.00         | 90.66 |             |  |
| 5AB-06                           | Enamel  | 605           | 38.55          | 0.02 | 0.39  | 50.04 | 0.32 | 0.07 | 0.06 | 1.12                           | 0.27 | 0.26 | 0.18         | 0.02 | 0.02         | 91.32 |             |  |
| 5AB-07                           | Enamel  | 726           | 38.57          | 0.00 | 0.30  | 50.21 | 0.28 | 0.00 | 0.08 | 0.87                           | 0.22 | 0.28 | 0.17         | 0.02 | 0.01         | 91.02 |             |  |
| 5AB-08                           | Enamel  | 847           | 38.72          | 0.00 | 0.12  | 50.88 | 0.26 | 0.03 | 0.05 | 0.93                           | 0.22 | 0.33 | 0.22         | 0.01 | 0.00         | 91.78 |             |  |
| 5AB-09                           | Enamel  | 968           | 38.21          | 0.00 | 0.13  | 50.84 | 0.28 | 0.03 | 0.09 | 0.91                           | 0.29 | 0.38 | 0.22         | 0.05 | 0.00         | 91.40 |             |  |
| 5AB-10                           | Enamel  | 1089          | 38.69          | 0.06 | 0.89  | 50.23 | 0.19 | 0.04 | 0.07 | 0.86                           | 0.19 | 0.38 | 0.13         | 0.01 | 0.00         | 91.73 |             |  |
| 5AB-11                           | Enamel  | 1210          | 38.69          | 0.04 | 1.03  | 50.76 | 0.23 | 0.11 | 0.05 | 0.84                           | 0.15 | 0.43 | 0.10         | 0.01 | 0.01         | 92.43 |             |  |
| 5AB-12                           | Enamel  | 1331          | 38.98          | 0.04 | 0.99  | 51.39 | 0.18 | 0.10 | 0.07 | 0.74                           | 0.17 | 0.47 | 0.05         | 0.00 | 0.00         | 93.17 |             |  |
| 5AB-13                           | Enamel  | 1452          | 37.28          | 0.13 | 2.34  | 49.87 | 0.20 | 0.07 | 0.08 | 0.66                           | 0.19 | 0.47 | 0.03         | 0.00 | 0.01         | 91.32 |             |  |
| 5AB-14                           | Enamel  | 1573          | 38.78          | 0.10 | 1.97  | 50.56 | 0.17 | 0.16 | 0.03 | 0.67                           | 0.12 | 0.53 | 0.07         | 0.01 | 0.00         | 93.16 |             |  |
| 5AB-15                           | Enamel  | 1694          | 38.73          | 0.06 | 1.36  | 50.82 | 0.21 | 0.15 | 0.06 | 0.65                           | 0.15 | 0.54 | 0.03         | 0.03 | 0.00         | 92.80 |             |  |
| 5AB-16                           | Cement  | 1815          | 33.74          | 0.38 | 5.37  | 47.39 | 0.16 | 0.67 | 0.14 | 0.49                           | 2.36 | 0.00 | 0.19         | 0.00 | 0.09         | 90.97 |             |  |
| 5AB-17                           | Cement  | 1936          | 33.96          | 0.28 | 6.11  | 46.68 | 0.16 | 0.65 | 0.18 | 0.57                           | 2.23 | 0.01 | 0.20         | 0.01 | 0.02         | 91.07 |             |  |
| 5AB-18                           | Cement  | 2057          | 34.33          | 0.28 | 5.42  | 47.27 | 0.14 | 0.61 | 0.13 | 0.50                           | 2.32 | 0.01 | 0.19         | 0.00 | 0.06         | 91.25 |             |  |
| 5AB-19                           | Enamel  | 2178          | 38.92          | 0.05 | 0.77  | 51.22 | 0.21 | 0.01 | 0.08 | 0.69                           | 0.20 | 0.54 | 0.10         | 0.01 | 0.01         | 92.80 |             |  |
| 5AB-20                           | Enamel  | 2299          | 39.21          | 0.03 | 1.19  | 51.47 | 0.17 | 0.06 | 0.01 | 0.67                           | 0.15 | 0.51 | 0.13         | 0.00 | 0.02         | 93.62 |             |  |
| 5AB-21                           | Enamel  | 2420          | 38.73          | 0.02 | 0.58  | 51.42 | 0.17 | 0.06 | 0.05 | 0.73                           | 0.08 | 0.49 | 0.10         | 0.00 | 0.02         | 92.46 |             |  |
| 5AB-22                           | Enamel  | 2541          | 38.85          | 0.00 | 0.22  | 51.18 | 0.18 | 0.01 | 0.04 | 0.90                           | 0.17 | 0.44 | 0.14         | 0.03 | 0.00         | 92.15 |             |  |
| 5AB-23                           | Enamel  | 2662          | 38.36          | 0.01 | 0.24  | 50.98 | 0.22 | 0.03 | 0.05 | 0.90                           | 0.22 | 0.38 | 0.20         | 0.03 | 0.00         | 91.60 |             |  |
| 5AB-24                           | Enamel  | 2783          | 38.35          | 0.00 | 0.17  | 51.09 | 0.28 | 0.00 | 0.05 | 1.00                           | 0.26 | 0.38 | 0.22         | 0.03 | 0.00         | 91.83 |             |  |
| 5AB-25                           | Enamel  | 2904          | 38.22          | 0.00 | 0.09  | 50.74 | 0.26 | 0.06 | 0.03 | 0.94                           | 0.25 | 0.32 | 0.24         | 0.02 | 0.01         | 91.16 |             |  |
| 5AB-26                           | Enamel  | 3025          | 38.04          | 0.00 | 0.05  | 50.59 | 0.29 | 0.04 | 0.06 | 1.03                           | 0.29 | 0.28 | 0.24         | 0.02 | 0.01         | 90.95 |             |  |
| 5AB-27                           | Enamel  | 3146          | 38.49          | 0.07 | 0.37  | 49.91 | 0.29 | 0.07 | 0.08 | 1.04                           | 0.37 | 0.23 | 0.21         | 0.03 | 0.01         | 91.17 |             |  |
| 5AB-28                           | Enamel  | 3267          | 38.15          | 0.07 | 0.63  | 49.41 | 0.29 | 0.06 | 0.10 | 1.25                           | 0.35 | 0.16 | 0.15         | 0.04 | 0.03         | 90.68 |             |  |
| 5AB-29                           | Dentin  | 3388          | 32.48          | 0.49 | 8.19  | 45.87 | 0.25 | 0.56 | 0.10 | 0.50                           | 2.37 | 0.02 | 0.29         | 0.01 | 0.09         | 91.21 |             |  |
| 5AB-30                           | Dentin  | 3509          | 29.43          | 0.69 | 12.97 | 41.06 | 0.31 | 2.60 | 0.12 | 0.45                           | 2.07 | 0.01 | 0.30         | 0.02 | 0.12         | 90.16 |             |  |

Cat# 5306 *Hippopotamus sp*

Molar fragment

Lake Albert, Kaiso Village Fm.

Surface Find

E30.96475396

N1.52576142

| Profile | Mineral | Distance (µm) | P2O5  | SiO2 | FeO   | CaO   | MgO  | MnO  | SrO  | Na2O | F    | Cl   | SO3  | K2O  | Al2O3 | Total |
|---------|---------|---------------|-------|------|-------|-------|------|------|------|------|------|------|------|------|-------|-------|
| 6AB-01  | Dentin  | 75            | 27.18 | 1.03 | 18.71 | 38.70 | 0.25 | 0.34 | 0.16 | 0.39 | 1.67 | 0.02 | 0.32 | 0.01 | 0.00  | 88.78 |
| 6AB-02  | Enamel  | 150           | 36.97 | 0.04 | 0.50  | 49.72 | 0.30 | 0.06 | 0.10 | 1.33 | 0.42 | 0.11 | 0.33 | 0.04 | 0.00  | 89.92 |
| 6AB-03  | Enamel  | 300           | 37.40 | 0.03 | 0.20  | 50.56 | 0.30 | 0.05 | 0.08 | 1.12 | 0.48 | 0.16 | 0.34 | 0.02 | 0.02  | 90.76 |
| 6AB-04  | Enamel  | 450           | 38.05 | 0.00 | 0.20  | 50.68 | 0.23 | 0.02 | 0.06 | 1.03 | 0.39 | 0.20 | 0.33 | 0.02 | 0.00  | 91.23 |
| 6AB-05  | Enamel  | 600           | 38.16 | 0.02 | 0.10  | 50.51 | 0.27 | 0.07 | 0.09 | 1.01 | 0.40 | 0.22 | 0.32 | 0.05 | 0.00  | 91.19 |
| 6AB-06  | Enamel  | 750           | 37.72 | 0.05 | 0.18  | 50.76 | 0.23 | 0.04 | 0.06 | 0.97 | 0.39 | 0.26 | 0.36 | 0.03 | 0.02  | 91.07 |
| 6AB-07  | Enamel  | 900           | 38.61 | 0.05 | 0.19  | 50.74 | 0.25 | 0.01 | 0.04 | 1.00 | 0.34 | 0.31 | 0.31 | 0.03 | 0.02  | 91.89 |
| 6AB-08  | Enamel  | 1050          | 39.13 | 0.01 | 0.06  | 51.13 | 0.24 | 0.05 | 0.05 | 0.97 | 0.21 | 0.38 | 0.27 | 0.02 | 0.01  | 92.53 |
| 6AB-09  | Enamel  | 1200          | 39.63 | 0.04 | 0.70  | 51.19 | 0.24 | 0.08 | 0.06 | 0.90 | 0.20 | 0.40 | 0.04 | 0.01 | 0.01  | 93.50 |
| 6AB-10  | Enamel  | 1350          | 38.50 | 0.04 | 0.75  | 51.25 | 0.23 | 0.09 | 0.02 | 0.86 | 0.16 | 0.43 | 0.09 | 0.03 | 0.00  | 92.45 |
| 6AB-11  | Enamel  | 1500          | 39.40 | 0.02 | 0.71  | 51.36 | 0.23 | 0.06 | 0.05 | 0.72 | 0.20 | 0.49 | 0.08 | 0.00 | 0.02  | 93.33 |
| 6AB-12  | Enamel  | 1650          | 39.84 | 0.02 | 0.51  | 51.43 | 0.22 | 0.16 | 0.08 | 0.72 | 0.29 | 0.53 | 0.06 | 0.03 | 0.00  | 93.89 |
| 6AB-13  | Enamel  | 1800          | 35.30 | 0.11 | 4.34  | 48.12 | 0.13 | 0.71 | 0.17 | 0.68 | 2.35 | 0.02 | 0.30 | 0.01 | 0.06  | 92.30 |
| 6AB-14  | Enamel  | 1950          | 34.47 | 0.12 | 5.50  | 46.86 | 0.11 | 0.90 | 0.18 | 0.56 | 2.31 | 0.00 | 0.17 | 0.01 | 0.03  | 91.22 |
| 6AB-15  | Enamel  | 2100          | 34.82 | 0.16 | 5.55  | 46.98 | 0.11 | 0.77 | 0.18 | 0.59 | 2.41 | 0.02 | 0.12 | 0.00 | 0.06  | 91.78 |
| 6AB-16  | Enamel  | 2250          | 38.85 | 0.05 | 0.62  | 50.67 | 0.21 | 0.18 | 0.05 | 0.59 | 0.48 | 0.54 | 0.22 | 0.02 | 0.00  | 92.49 |
| 6AB-17  | Enamel  | 2400          | 39.22 | 0.00 | 0.09  | 51.71 | 0.33 | 0.13 | 0.03 | 0.70 | 0.18 | 0.52 | 0.13 | 0.01 | 0.00  | 93.05 |
| 6AB-18  | Enamel  | 2550          | 39.13 | 0.02 | 0.40  | 50.96 | 0.27 | 0.10 | 0.03 | 0.77 | 0.27 | 0.49 | 0.13 | 0.04 | 0.00  | 92.61 |
| 6AB-19  | Enamel  | 2700          | 38.47 | 0.00 | 0.45  | 51.61 | 0.23 | 0.12 | 0.05 | 0.75 | 0.18 | 0.50 | 0.13 | 0.02 | 0.01  | 92.51 |
| 6AB-20  | Enamel  | 2850          | 38.03 | 0.01 | 0.33  | 51.91 | 0.21 | 0.09 | 0.07 | 0.79 | 0.17 | 0.49 | 0.12 | 0.00 | 0.01  | 92.24 |
| 6AB-21  | Enamel  | 3000          | 39.50 | 0.06 | 0.22  | 51.62 | 0.24 | 0.02 | 0.04 | 0.86 | 0.19 | 0.43 | 0.11 | 0.01 | 0.01  | 93.32 |
| 6AB-22  | Enamel  | 3150          | 38.72 | 0.01 | 0.61  | 51.24 | 0.22 | 0.08 | 0.04 | 0.90 | 0.26 | 0.42 | 0.05 | 0.00 | 0.01  | 92.56 |
| 6AB-23  | Enamel  | 3300          | 38.78 | 0.00 | 0.02  | 51.57 | 0.28 | 0.07 | 0.05 | 0.89 | 0.23 | 0.37 | 0.28 | 0.02 | 0.01  | 92.56 |
| 6AB-24  | Enamel  | 3450          | 37.88 | 0.00 | 0.07  | 51.06 | 0.25 | 0.06 | 0.06 | 1.00 | 0.24 | 0.30 | 0.30 | 0.03 | 0.00  | 91.26 |
| 6AB-25  | Enamel  | 3600          | 38.18 | 0.00 | 0.09  | 51.00 | 0.24 | 0.05 | 0.06 | 0.94 | 0.29 | 0.26 | 0.29 | 0.02 | 0.01  | 91.42 |
| 6AB-26  | Enamel  | 3750          | 37.39 | 0.00 | 0.24  | 50.52 | 0.29 | 0.06 | 0.06 | 1.06 | 0.21 | 0.20 | 0.23 | 0.02 | 0.00  | 90.26 |
| 6AB-27  | Enamel  | 3900          | 36.90 | 0.03 | 0.67  | 50.38 | 0.27 | 0.06 | 0.04 | 0.99 | 0.43 | 0.19 | 0.29 | 0.04 | 0.00  | 90.26 |
| 6AB-28  | Enamel  | 4050          | 37.94 | 0.00 | 0.21  | 50.03 | 0.32 | 0.01 | 0.07 | 1.19 | 0.25 | 0.15 | 0.24 | 0.02 | 0.02  | 90.46 |
| 6AB-29  | Enamel  | 4200          | 38.03 | 0.02 | 0.34  | 49.89 | 0.38 | 0.04 | 0.03 | 1.22 | 0.34 | 0.13 | 0.28 | 0.03 | 0.00  | 90.71 |
| 6AB-30  | Dentin  | 4350          | 34.60 | 0.33 | 4.83  | 48.05 | 0.25 | 0.26 | 0.16 | 0.56 | 2.35 | 0.03 | 0.36 | 0.01 | 0.05  | 91.83 |

**Cat# 5306** *Hippopotamus sp*

Molar fragment

Lake Albert, Kaiso Village Fm.

Surface Find

E30.96475396

N1.52576142

| Profile | Mineral | Distance<br>( $\mu\text{m}$ ) | P2O5  | SiO2 | FeO  | CaO   | MgO  | MnO  | SrO  | Na2O | F    | Cl   | SO3  | K2O  | Al2O3 | Total |
|---------|---------|-------------------------------|-------|------|------|-------|------|------|------|------|------|------|------|------|-------|-------|
| 6CD-01  | Dentin  | 72                            | 33.50 | 0.33 | 6.97 | 46.84 | 0.19 | 0.38 | 0.18 | 0.47 | 2.02 | 0.02 | 0.27 | 0.01 | 0.06  | 91.22 |
| 6CD-02  | Dentin  | 144                           | 34.18 | 0.25 | 4.88 | 47.93 | 0.20 | 0.38 | 0.19 | 0.60 | 2.17 | 0.02 | 0.26 | 0.03 | 0.02  | 91.09 |
| 6CD-03  | Enamel  | 288                           | 38.28 | 0.06 | 0.08 | 50.13 | 0.31 | 0.07 | 0.06 | 1.26 | 0.38 | 0.10 | 0.11 | 0.03 | 0.00  | 90.86 |
| 6CD-04  | Enamel  | 432                           | 38.38 | 0.02 | 0.09 | 50.41 | 0.31 | 0.02 | 0.09 | 1.17 | 0.37 | 0.14 | 0.12 | 0.03 | 0.00  | 91.15 |
| 6CD-05  | Enamel  | 576                           | 38.04 | 0.01 | 0.29 | 50.32 | 0.29 | 0.03 | 0.06 | 1.10 | 0.29 | 0.19 | 0.17 | 0.02 | 0.00  | 90.81 |
| 6CD-06  | Enamel  | 720                           | 37.48 | 0.01 | 0.21 | 50.98 | 0.25 | 0.04 | 0.06 | 1.06 | 0.30 | 0.24 | 0.21 | 0.01 | 0.01  | 90.84 |
| 6CD-07  | Enamel  | 864                           | 38.37 | 0.02 | 0.28 | 50.94 | 0.28 | 0.01 | 0.05 | 1.05 | 0.22 | 0.26 | 0.20 | 0.03 | 0.01  | 91.70 |
| 6CD-08  | Enamel  | 1008                          | 39.21 | 0.05 | 0.40 | 51.12 | 0.29 | 0.06 | 0.03 | 0.95 | 0.21 | 0.29 | 0.10 | 0.01 | 0.00  | 92.73 |
| 6CD-09  | Enamel  | 1152                          | 39.11 | 0.04 | 0.56 | 51.16 | 0.21 | 0.06 | 0.04 | 0.82 | 0.29 | 0.36 | 0.08 | 0.03 | 0.03  | 92.77 |
| 6CD-10  | Enamel  | 1296                          | 38.08 | 0.18 | 3.10 | 49.62 | 0.24 | 0.09 | 0.06 | 0.87 | 0.28 | 0.38 | 0.11 | 0.03 | 0.03  | 93.06 |
| 6CD-11  | Cement  | 1440                          | 34.79 | 0.23 | 5.00 | 47.15 | 0.18 | 0.68 | 0.14 | 0.54 | 2.40 | 0.01 | 0.18 | 0.02 | 0.10  | 91.42 |
| 6CD-12  | Cement  | 1584                          | 35.35 | 0.18 | 5.53 | 46.79 | 0.15 | 0.77 | 0.18 | 0.56 | 2.22 | 0.01 | 0.14 | 0.00 | 0.10  | 91.97 |
| 6CD-13  | Cement  | 1728                          | 33.84 | 0.48 | 6.00 | 46.58 | 0.21 | 0.92 | 0.15 | 0.58 | 2.40 | 0.01 | 0.22 | 0.01 | 0.19  | 91.60 |
| 6CD-14  | Cement  | 1872                          | 34.44 | 0.37 | 5.99 | 46.45 | 0.13 | 0.64 | 0.12 | 0.54 | 2.44 | 0.01 | 0.19 | 0.00 | 0.17  | 91.51 |
| 6CD-15  | Enamel  | 2016                          | 38.67 | 0.03 | 0.51 | 50.33 | 0.29 | 0.05 | 0.05 | 0.87 | 0.50 | 0.31 | 0.12 | 0.02 | 0.02  | 91.77 |
| 6CD-16  | Enamel  | 2160                          | 39.21 | 0.05 | 0.58 | 51.38 | 0.25 | 0.04 | 0.06 | 0.75 | 0.28 | 0.46 | 0.07 | 0.03 | 0.01  | 93.17 |
| 6CD-17  | Enamel  | 2304                          | 39.27 | 0.03 | 0.75 | 51.38 | 0.19 | 0.05 | 0.02 | 0.77 | 0.27 | 0.41 | 0.07 | 0.03 | 0.02  | 93.26 |
| 6CD-18  | Enamel  | 2448                          | 38.94 | 0.06 | 0.55 | 51.23 | 0.21 | 0.04 | 0.07 | 0.87 | 0.22 | 0.35 | 0.08 | 0.02 | 0.00  | 92.63 |
| 6CD-19  | Enamel  | 2592                          | 39.16 | 0.04 | 0.78 | 50.88 | 0.22 | 0.14 | 0.05 | 0.97 | 0.18 | 0.29 | 0.11 | 0.03 | 0.00  | 92.85 |
| 6CD-20  | Enamel  | 2736                          | 37.83 | 0.00 | 0.34 | 51.05 | 0.22 | 0.09 | 0.05 | 1.01 | 0.27 | 0.27 | 0.22 | 0.02 | 0.00  | 91.37 |
| 6CD-21  | Enamel  | 2880                          | 38.19 | 0.00 | 0.18 | 50.63 | 0.23 | 0.16 | 0.08 | 1.00 | 0.27 | 0.23 | 0.27 | 0.02 | 0.01  | 91.26 |
| 6CD-22  | Enamel  | 3024                          | 37.29 | 0.08 | 0.70 | 50.51 | 0.26 | 0.00 | 0.09 | 1.07 | 0.31 | 0.20 | 0.21 | 0.02 | 0.02  | 90.76 |
| 6CD-23  | Enamel  | 3168                          | 38.15 | 0.08 | 0.31 | 50.33 | 0.24 | 0.04 | 0.06 | 1.08 | 0.30 | 0.17 | 0.26 | 0.02 | 0.00  | 91.03 |
| 6CD-24  | Enamel  | 3312                          | 37.68 | 0.17 | 0.55 | 49.72 | 0.25 | 0.00 | 0.07 | 1.04 | 0.33 | 0.13 | 0.32 | 0.03 | 0.00  | 90.29 |
| 6CD-25  | Enamel  | 3456                          | 37.76 | 0.01 | 0.13 | 50.01 | 0.29 | 0.06 | 0.08 | 1.08 | 0.39 | 0.11 | 0.27 | 0.03 | 0.00  | 90.22 |
| 6CD-26  | Enamel  | 3600                          | 37.40 | 0.05 | 0.17 | 49.99 | 0.24 | 0.04 | 0.06 | 1.17 | 0.52 | 0.10 | 0.33 | 0.03 | 0.00  | 90.11 |
| 6CD-27  | Dentin  | 3744                          | 33.45 | 0.30 | 5.76 | 47.18 | 0.19 | 0.33 | 0.13 | 0.46 | 2.08 | 0.02 | 0.19 | 0.00 | 0.04  | 90.12 |
| 6CD-28  | Dentin  | 3888                          | 33.78 | 0.35 | 6.42 | 46.83 | 0.16 | 0.44 | 0.16 | 0.48 | 2.12 | 0.01 | 0.19 | 0.00 | 0.07  | 91.02 |
| 6CD-29  | Dentin  | 4032                          | 34.53 | 0.29 | 7.08 | 46.23 | 0.19 | 0.50 | 0.15 | 0.52 | 2.02 | 0.01 | 0.17 | 0.00 | 0.04  | 91.72 |
| 6CD-30  | Dentin  | 4176                          | 32.85 | 0.35 | 8.52 | 45.40 | 0.21 | 0.49 | 0.15 | 0.51 | 2.08 | 0.02 | 0.16 | 0.01 | 0.05  | 90.78 |

Cat# 5306 *Hippopotamus sp* Molar fragmen Lake Albert, Kaiso Village Fm. Surface Find E30.96475396 N1.52576142

| Comment     | Mineral | Distance<br>( $\mu\text{m}$ ) | P2O5  | SiO2 | FeO   | CaO   | MgO  | MnO  | SrO  | Na2O | F    | Cl   | SO3  | K2O  | Al2O3 | H2O  | Total |
|-------------|---------|-------------------------------|-------|------|-------|-------|------|------|------|------|------|------|------|------|-------|------|-------|
| 05306-L3-01 | Enamel  | 100                           | 31.29 | 0.52 | 14.40 | 40.96 | 0.22 | 0.36 | 0.14 | 0.61 | 1.97 | 0.08 | 0.23 | 0.03 | 0.16  | 0.68 | 91.65 |
| 05306-L3-02 | Enamel  | 400                           | 38.19 | 0.00 | 0.34  | 50.17 | 0.24 | 0.08 | 0.07 | 0.86 | 1.20 | 0.13 | 0.13 | 0.00 | 0.00  | 1.05 | 92.47 |
| 05306-L3-03 | Enamel  | 700                           | 38.56 | 0.06 | 0.72  | 49.44 | 0.26 | 0.09 | 0.08 | 1.17 | 0.52 | 0.15 | 0.11 | 0.03 | 0.00  | 1.34 | 92.53 |
| 05306-L3-04 | Enamel  | 1000                          | 39.22 | 0.00 | 0.12  | 49.33 | 0.31 | 0.00 | 0.07 | 1.18 | 0.55 | 0.13 | 0.12 | 0.03 | 0.00  | 1.33 | 92.39 |
| 05306-L3-05 | Enamel  | 1300                          | 38.17 | 0.00 | 0.14  | 49.00 | 0.31 | 0.00 | 0.08 | 1.12 | 0.49 | 0.16 | 0.21 | 0.04 | 0.00  | 1.33 | 91.06 |
| 05306-L3-06 | Enamel  | 1600                          | 38.03 | 0.00 | 0.10  | 49.45 | 0.30 | 0.00 | 0.07 | 1.12 | 0.52 | 0.14 | 0.22 | 0.04 | 0.00  | 1.32 | 91.31 |
| 05306-L3-07 | Enamel  | 1900                          | 38.09 | 0.00 | 0.04  | 48.87 | 0.32 | 0.00 | 0.07 | 1.05 | 0.52 | 0.15 | 0.30 | 0.04 | 0.00  | 1.32 | 90.77 |
| 05306-L3-08 | Enamel  | 2200                          | 38.21 | 0.00 | 0.26  | 49.43 | 0.31 | 0.00 | 0.09 | 1.11 | 0.51 | 0.16 | 0.31 | 0.04 | 0.00  | 1.33 | 91.76 |
| 05306-L3-09 | Enamel  | 2500                          | 38.14 | 0.04 | 0.43  | 48.96 | 0.28 | 0.10 | 0.07 | 1.11 | 0.57 | 0.15 | 0.30 | 0.04 | 0.00  | 1.30 | 91.50 |
| 05306-L3-10 | Enamel  | 2800                          | 38.25 | 0.05 | 0.40  | 48.66 | 0.29 | 0.06 | 0.08 | 1.04 | 0.58 | 0.16 | 0.25 | 0.05 | 0.00  | 1.30 | 91.14 |
| 05306-L3-11 | Enamel  | 3100                          | 38.34 | 0.05 | 0.33  | 48.28 | 0.26 | 0.06 | 0.07 | 1.05 | 0.67 | 0.16 | 0.28 | 0.03 | 0.00  | 1.26 | 90.84 |
| 05306-L3-12 | Enamel  | 3400                          | 38.15 | 0.00 | 0.33  | 48.74 | 0.29 | 0.00 | 0.04 | 1.12 | 0.45 | 0.18 | 0.26 | 0.05 | 0.00  | 1.34 | 90.95 |
| 05306-L3-13 | Enamel  | 3700                          | 38.37 | 0.03 | 0.28  | 49.39 | 0.27 | 0.00 | 0.05 | 0.99 | 0.53 | 0.19 | 0.27 | 0.04 | 0.00  | 1.32 | 91.72 |
| 05306-L3-14 | Enamel  | 4000                          | 38.32 | 0.05 | 0.27  | 48.97 | 0.25 | 0.07 | 0.09 | 1.11 | 0.57 | 0.16 | 0.27 | 0.04 | 0.00  | 1.30 | 91.48 |
| 05306-L3-15 | Enamel  | 4300                          | 37.90 | 0.00 | 0.09  | 48.91 | 0.30 | 0.00 | 0.06 | 1.24 | 0.55 | 0.15 | 0.33 | 0.03 | 0.00  | 1.30 | 90.85 |
| 05306-L3-16 | Enamel  | 4600                          | 38.18 | 0.00 | 0.07  | 48.97 | 0.30 | 0.00 | 0.07 | 1.07 | 0.59 | 0.16 | 0.33 | 0.02 | 0.00  | 1.29 | 91.05 |
| 05306-L3-17 | Enamel  | 4900                          | 38.24 | 0.05 | 0.05  | 48.44 | 0.34 | 0.00 | 0.07 | 1.19 | 0.47 | 0.16 | 0.30 | 0.03 | 0.00  | 1.34 | 90.69 |
| 05306-L3-18 | Enamel  | 5200                          | 38.07 | 0.00 | 0.08  | 49.55 | 0.35 | 0.00 | 0.08 | 1.01 | 0.52 | 0.17 | 0.32 | 0.02 | 0.00  | 1.32 | 91.51 |
| 05306-L3-19 | Enamel  | 5500                          | 38.53 | 0.00 | 0.11  | 49.59 | 0.39 | 0.00 | 0.06 | 1.16 | 0.49 | 0.18 | 0.26 | 0.03 | 0.00  | 1.34 | 92.14 |
| 05306-L3-20 | Enamel  | 5800                          | 38.13 | 0.00 | 0.15  | 49.38 | 0.36 | 0.00 | 0.08 | 1.07 | 0.50 | 0.15 | 0.24 | 0.05 | 0.00  | 1.33 | 91.45 |
| 05306-L3-21 | Enamel  | 6100                          | 38.01 | 0.00 | 0.11  | 48.99 | 0.37 | 0.00 | 0.06 | 1.19 | 0.54 | 0.15 | 0.30 | 0.02 | 0.00  | 1.31 | 91.05 |
| 05306-L3-22 | Enamel  | 6400                          | 37.77 | 0.00 | 0.16  | 48.79 | 0.36 | 0.05 | 0.08 | 1.18 | 0.47 | 0.18 | 0.27 | 0.00 | 0.00  | 1.33 | 90.63 |
| 05306-L3-23 | Enamel  | 6700                          | 37.68 | 0.00 | 0.05  | 48.74 | 0.34 | 0.07 | 0.04 | 1.14 | 0.55 | 0.14 | 0.37 | 0.04 | 0.00  | 1.30 | 90.48 |
| 05306-L3-24 | Enamel  | 7000                          | 37.91 | 0.00 | 0.18  | 48.82 | 0.29 | 0.00 | 0.07 | 1.15 | 0.59 | 0.15 | 0.41 | 0.00 | 0.00  | 1.29 | 90.86 |
| 05306-L3-25 | Enamel  | 7300                          | 37.58 | 0.03 | 0.17  | 48.23 | 0.28 | 0.00 | 0.07 | 1.08 | 0.68 | 0.16 | 0.34 | 0.04 | 0.00  | 1.24 | 89.89 |
| 05306-L3-26 | Enamel  | 7600                          | 37.84 | 0.00 | 0.11  | 47.93 | 0.30 | 0.00 | 0.06 | 1.12 | 0.62 | 0.15 | 0.33 | 0.02 | 0.00  | 1.26 | 89.74 |
| 05306-L3-27 | Enamel  | 7900                          | 37.66 | 0.04 | 0.14  | 49.04 | 0.25 | 0.06 | 0.08 | 1.21 | 0.65 | 0.16 | 0.38 | 0.03 | 0.00  | 1.26 | 90.94 |
| 05306-L3-28 | Enamel  | 8200                          | 37.45 | 0.04 | 0.44  | 47.93 | 0.28 | 0.00 | 0.09 | 1.12 | 0.63 | 0.13 | 0.38 | 0.03 | 0.00  | 1.26 | 89.77 |
| 05306-L3-29 | Enamel  | 8500                          | 37.69 | 0.00 | 0.13  | 48.52 | 0.27 | 0.00 | 0.07 | 1.15 | 0.61 | 0.17 | 0.41 | 0.04 | 0.00  | 1.27 | 90.33 |
| 05306-L3-30 | Enamel  | 8800                          | 37.91 | 0.00 | 0.10  | 48.87 | 0.29 | 0.00 | 0.07 | 1.14 | 0.54 | 0.17 | 0.38 | 0.04 | 0.00  | 1.30 | 90.80 |



**Cat# 5306** *Hippopotamus sp* Molar fragmen Lake Albert, Kaiso Village Fm. Surface Find E30.96475396 N1.52576142

| Comment     | Mineral | Distance<br>( $\mu\text{m}$ ) | P2O5  | SiO2 | FeO  | CaO   | MgO  | MnO  | SrO  | Na2O | F    | Cl   | SO3  | K2O  | Al2O3 | H2O  | Total |
|-------------|---------|-------------------------------|-------|------|------|-------|------|------|------|------|------|------|------|------|-------|------|-------|
| 05306-L3-31 | Enamel  | 9100                          | 37.89 | 0.00 | 0.00 | 48.94 | 0.32 | 0.00 | 0.08 | 1.14 | 0.58 | 0.19 | 0.49 | 0.04 | 0.00  | 1.29 | 90.95 |
| 05306-L3-32 | Enamel  | 9400                          | 38.36 | 0.00 | 0.00 | 48.92 | 0.33 | 0.00 | 0.05 | 1.13 | 0.46 | 0.18 | 0.41 | 0.03 | 0.00  | 1.35 | 91.20 |
| 05306-L3-33 | Enamel  | 9700                          | 38.41 | 0.00 | 0.15 | 48.58 | 0.33 | 0.00 | 0.07 | 1.12 | 0.49 | 0.22 | 0.31 | 0.05 | 0.00  | 1.32 | 91.05 |
| 05306-L3-34 | Enamel  | 10000                         | 38.47 | 0.00 | 0.11 | 49.49 | 0.34 | 0.00 | 0.05 | 1.07 | 0.41 | 0.22 | 0.30 | 0.04 | 0.00  | 1.36 | 91.87 |
| 05306-L3-35 | Enamel  | 10300                         | 38.37 | 0.00 | 0.25 | 48.78 | 0.36 | 0.00 | 0.04 | 1.09 | 0.49 | 0.23 | 0.27 | 0.03 | 0.00  | 1.32 | 91.22 |
| 05306-L3-36 | Enamel  | 10600                         | 38.74 | 0.00 | 0.06 | 48.70 | 0.35 | 0.00 | 0.07 | 1.11 | 0.47 | 0.21 | 0.31 | 0.06 | 0.00  | 1.34 | 91.42 |
| 05306-L3-37 | Enamel  | 10900                         | 38.48 | 0.05 | 0.65 | 48.23 | 0.35 | 0.06 | 0.09 | 1.13 | 0.48 | 0.18 | 0.18 | 0.00 | 0.00  | 1.34 | 91.21 |
| 05306-L3-38 | Enamel  | 11200                         | 38.06 | 0.00 | 0.28 | 48.35 | 0.35 | 0.00 | 0.04 | 1.20 | 0.51 | 0.17 | 0.22 | 0.02 | 0.00  | 1.31 | 90.51 |
| 05306-L3-39 | Enamel  | 11500                         | 38.19 | 0.00 | 0.05 | 49.32 | 0.34 | 0.00 | 0.06 | 1.20 | 0.49 | 0.20 | 0.32 | 0.03 | 0.00  | 1.33 | 91.51 |
| 05306-L3-40 | Enamel  | 11800                         | 38.43 | 0.00 | 0.03 | 49.10 | 0.38 | 0.00 | 0.05 | 1.15 | 0.47 | 0.20 | 0.39 | 0.02 | 0.00  | 1.34 | 91.57 |
| 05306-L3-41 | Enamel  | 12100                         | 38.73 | 0.03 | 0.25 | 48.41 | 0.32 | 0.06 | 0.03 | 1.13 | 0.46 | 0.21 | 0.23 | 0.04 | 0.00  | 1.34 | 91.22 |
| 05306-L3-42 | Enamel  | 12400                         | 38.51 | 0.00 | 0.16 | 49.49 | 0.35 | 0.00 | 0.09 | 1.07 | 0.45 | 0.21 | 0.30 | 0.04 | 0.00  | 1.35 | 92.00 |
| 05306-L3-43 | Enamel  | 12700                         | 37.39 | 0.12 | 2.60 | 47.20 | 0.31 | 0.12 | 0.10 | 1.04 | 0.47 | 0.22 | 0.10 | 0.00 | 0.00  | 1.31 | 90.98 |
| 05306-L3-44 | Enamel  | 13000                         | 38.13 | 0.00 | 0.35 | 47.95 | 0.34 | 0.06 | 0.09 | 1.10 | 0.50 | 0.19 | 0.22 | 0.00 | 0.00  | 1.31 | 90.23 |
| 05306-L3-45 | Enamel  | 13300                         | 38.50 | 0.05 | 0.11 | 48.77 | 0.36 | 0.00 | 0.07 | 1.05 | 0.51 | 0.20 | 0.28 | 0.03 | 0.00  | 1.32 | 91.25 |
| 05306-L3-46 | Enamel  | 13600                         | 38.12 | 0.00 | 0.15 | 48.78 | 0.33 | 0.00 | 0.07 | 1.15 | 0.52 | 0.20 | 0.29 | 0.02 | 0.00  | 1.31 | 90.94 |
| 05306-L3-47 | Enamel  | 13900                         | 37.50 | 0.00 | 0.49 | 48.20 | 0.34 | 0.00 | 0.08 | 1.19 | 0.51 | 0.20 | 0.23 | 0.04 | 0.00  | 1.30 | 90.09 |
| 05306-L3-48 | Enamel  | 14200                         | 37.75 | 0.00 | 0.30 | 48.17 | 0.34 | 0.05 | 0.06 | 1.16 | 0.50 | 0.15 | 0.26 | 0.04 | 0.00  | 1.31 | 90.08 |
| 05306-L3-49 | Enamel  | 14500                         | 37.91 | 0.00 | 0.20 | 48.09 | 0.33 | 0.08 | 0.08 | 1.15 | 0.52 | 0.17 | 0.27 | 0.02 | 0.00  | 1.30 | 90.10 |
| 05306-L3-50 | Enamel  | 14800                         | 38.40 | 0.00 | 0.33 | 47.77 | 0.32 | 0.08 | 0.09 | 1.16 | 0.52 | 0.15 | 0.26 | 0.04 | 0.00  | 1.32 | 90.43 |
| 05306-L3-51 | Enamel  | 15100                         | 38.00 | 0.03 | 0.27 | 48.54 | 0.30 | 0.00 | 0.07 | 1.19 | 0.62 | 0.15 | 0.27 | 0.05 | 0.00  | 1.28 | 90.75 |
| 05306-L3-52 | Enamel  | 15400                         | 38.27 | 0.00 | 0.50 | 47.62 | 0.33 | 0.10 | 0.09 | 1.12 | 0.57 | 0.14 | 0.25 | 0.03 | 0.00  | 1.30 | 90.31 |
| 05306-L3-53 | Enamel  | 15700                         | 38.62 | 0.00 | 0.50 | 48.48 | 0.35 | 0.13 | 0.04 | 1.23 | 0.48 | 0.19 | 0.26 | 0.04 | 0.00  | 1.34 | 91.65 |
| 05306-L3-54 | Enamel  | 16000                         | 38.70 | 0.00 | 0.57 | 48.08 | 0.34 | 0.06 | 0.08 | 1.17 | 0.53 | 0.17 | 0.21 | 0.03 | 0.00  | 1.32 | 91.25 |
| 05306-L3-55 | Enamel  | 16300                         | 38.01 | 0.00 | 0.58 | 47.53 | 0.32 | 0.00 | 0.07 | 1.22 | 0.49 | 0.17 | 0.21 | 0.00 | 0.00  | 1.31 | 89.90 |
| 05306-L3-56 | Enamel  | 16600                         | 38.26 | 0.00 | 0.58 | 47.64 | 0.34 | 0.06 | 0.08 | 1.18 | 0.49 | 0.16 | 0.22 | 0.05 | 0.00  | 1.32 | 90.38 |
| 05306-L3-57 | Enamel  | 16900                         | 37.74 | 0.06 | 0.43 | 48.11 | 0.35 | 0.08 | 0.08 | 1.20 | 0.49 | 0.18 | 0.22 | 0.04 | 0.00  | 1.31 | 90.29 |
| 05306-L3-58 | Enamel  | 17200                         | 38.57 | 0.04 | 0.39 | 48.03 | 0.33 | 0.08 | 0.08 | 1.11 | 0.53 | 0.19 | 0.24 | 0.03 | 0.00  | 1.31 | 90.92 |
| 05306-L3-59 | Enamel  | 17500                         | 38.39 | 0.06 | 0.57 | 48.49 | 0.31 | 0.09 | 0.07 | 1.14 | 0.48 | 0.18 | 0.18 | 0.03 | 0.03  | 1.34 | 91.35 |
| 05306-L3-60 | Enamel  | 17800                         | 38.22 | 0.05 | 0.79 | 48.42 | 0.30 | 0.10 | 0.09 | 1.12 | 0.50 | 0.19 | 0.28 | 0.02 | 0.00  | 1.32 | 91.40 |

**Cat# 5306** *Hippopotamus sp* Molar fragmen Lake Albert, Kaiso Village Fm. Surface Find E30.96475396 N1.52576142

| Comment     | Mineral | Distance<br>( $\mu\text{m}$ ) | P2O5  | SiO2 | FeO  | CaO   | MgO  | MnO  | SrO  | Na2O | F    | Cl   | SO3  | K2O  | Al2O3 | H2O  | Total |
|-------------|---------|-------------------------------|-------|------|------|-------|------|------|------|------|------|------|------|------|-------|------|-------|
| 05306-L3-61 | Enamel  | 18100                         | 37.82 | 0.00 | 0.71 | 47.90 | 0.30 | 0.13 | 0.07 | 1.21 | 0.47 | 0.18 | 0.20 | 0.03 | 0.00  | 1.32 | 90.33 |
| 05306-L3-62 | Enamel  | 18400                         | 37.83 | 0.05 | 0.73 | 47.56 | 0.27 | 0.14 | 0.08 | 1.16 | 0.49 | 0.15 | 0.22 | 0.05 | 0.00  | 1.32 | 90.04 |
| 05306-L3-63 | Enamel  | 18700                         | 38.31 | 0.03 | 0.47 | 48.85 | 0.31 | 0.10 | 0.08 | 1.13 | 0.48 | 0.17 | 0.22 | 0.04 | 0.00  | 1.34 | 91.52 |
| 05306-L3-64 | Enamel  | 19000                         | 37.96 | 0.05 | 0.56 | 48.25 | 0.28 | 0.00 | 0.04 | 1.07 | 0.51 | 0.17 | 0.21 | 0.04 | 0.00  | 1.31 | 90.45 |
| 05306-L3-65 | Enamel  | 19300                         | 37.89 | 0.04 | 0.84 | 47.98 | 0.28 | 0.19 | 0.07 | 1.15 | 0.45 | 0.16 | 0.20 | 0.03 | 0.00  | 1.34 | 90.63 |
| 05306-L3-66 | Enamel  | 19600                         | 38.25 | 0.00 | 0.47 | 47.48 | 0.30 | 0.12 | 0.08 | 1.15 | 0.47 | 0.18 | 0.20 | 0.04 | 0.00  | 1.32 | 90.05 |
| 05306-L3-67 | Enamel  | 19900                         | 39.03 | 0.00 | 0.35 | 47.48 | 0.29 | 0.00 | 0.07 | 1.19 | 0.53 | 0.18 | 0.18 | 0.02 | 0.00  | 1.31 | 90.64 |
| 05306-L3-68 | Enamel  | 20200                         | 38.03 | 0.00 | 0.30 | 48.15 | 0.30 | 0.00 | 0.09 | 1.10 | 0.52 | 0.18 | 0.23 | 0.03 | 0.00  | 1.30 | 90.24 |
| 05306-L3-69 | Enamel  | 20500                         | 38.29 | 0.05 | 0.48 | 47.90 | 0.30 | 0.09 | 0.07 | 1.13 | 0.49 | 0.18 | 0.16 | 0.04 | 0.00  | 1.32 | 90.50 |
| 05306-L3-70 | Enamel  | 20800                         | 38.19 | 0.00 | 0.22 | 48.90 | 0.31 | 0.05 | 0.09 | 1.04 | 0.41 | 0.22 | 0.23 | 0.04 | 0.00  | 1.35 | 91.04 |
| 05306-L3-71 | Enamel  | 21100                         | 38.23 | 0.00 | 0.13 | 48.74 | 0.29 | 0.00 | 0.09 | 1.10 | 0.55 | 0.21 | 0.27 | 0.03 | 0.00  | 1.30 | 90.94 |
| 05306-L3-72 | Enamel  | 21400                         | 38.42 | 0.00 | 0.31 | 48.02 | 0.31 | 0.00 | 0.07 | 1.10 | 0.49 | 0.22 | 0.22 | 0.02 | 0.00  | 1.31 | 90.50 |
| 05306-L3-73 | Enamel  | 21700                         | 38.15 | 0.00 | 0.40 | 47.82 | 0.28 | 0.06 | 0.08 | 1.02 | 0.44 | 0.21 | 0.20 | 0.03 | 0.00  | 1.33 | 90.02 |
| 05306-L3-74 | Enamel  | 22000                         | 38.33 | 0.00 | 0.18 | 48.26 | 0.30 | 0.08 | 0.07 | 1.08 | 0.50 | 0.22 | 0.16 | 0.04 | 0.00  | 1.31 | 90.52 |
| 05306-L3-75 | Enamel  | 22300                         | 38.70 | 0.00 | 0.04 | 48.42 | 0.30 | 0.00 | 0.06 | 0.99 | 0.44 | 0.27 | 0.24 | 0.02 | 0.00  | 1.33 | 90.82 |
| 05306-L3-76 | Enamel  | 22600                         | 38.86 | 0.00 | 0.22 | 48.98 | 0.28 | 0.00 | 0.05 | 0.97 | 0.41 | 0.30 | 0.16 | 0.03 | 0.00  | 1.34 | 91.59 |
| 05306-L3-77 | Enamel  | 22900                         | 39.39 | 0.00 | 0.07 | 48.51 | 0.27 | 0.07 | 0.06 | 0.88 | 0.45 | 0.32 | 0.25 | 0.03 | 0.00  | 1.33 | 91.62 |
| 05306-L3-78 | Enamel  | 23200                         | 39.25 | 0.00 | 0.15 | 48.49 | 0.23 | 0.08 | 0.12 | 0.91 | 0.44 | 0.33 | 0.17 | 0.02 | 0.00  | 1.33 | 91.52 |
| 05306-L3-79 | Enamel  | 23500                         | 39.22 | 0.05 | 0.39 | 48.41 | 0.27 | 0.15 | 0.05 | 0.86 | 0.40 | 0.34 | 0.14 | 0.00 | 0.00  | 1.34 | 91.63 |
| 05306-L3-80 | Enamel  | 23800                         | 39.51 | 0.00 | 0.33 | 49.74 | 0.25 | 0.10 | 0.05 | 0.90 | 0.35 | 0.37 | 0.16 | 0.03 | 0.00  | 1.38 | 93.17 |
| 05306-L3-81 | Enamel  | 24100                         | 39.04 | 0.00 | 0.26 | 48.78 | 0.26 | 0.05 | 0.09 | 0.93 | 0.37 | 0.32 | 0.15 | 0.02 | 0.00  | 1.36 | 91.62 |
| 05306-L3-82 | Enamel  | 24400                         | 39.31 | 0.06 | 0.70 | 48.97 | 0.27 | 0.07 | 0.09 | 0.95 | 0.36 | 0.32 | 0.14 | 0.03 | 0.00  | 1.38 | 92.65 |
| 05306-L3-83 | Enamel  | 24700                         | 38.90 | 0.00 | 0.24 | 49.38 | 0.27 | 0.10 | 0.05 | 0.94 | 0.43 | 0.29 | 0.12 | 0.02 | 0.00  | 1.34 | 92.08 |
| 05306-L3-84 | Enamel  | 25000                         | 38.95 | 0.00 | 0.06 | 49.97 | 0.32 | 0.06 | 0.10 | 0.99 | 0.44 | 0.29 | 0.19 | 0.03 | 0.00  | 1.35 | 92.74 |

Cat# 5306 *Hippopotamus sp* Molar fragmen Lake Albert, Kaiso Village Fm. Surface Find E30.96475396 N1.52576142

| Profile | Mineral | Distance (µm) | P2O5  | SiO2 | FeO   | CaO   | MgO  | MnO  | SrO  | Na2O | F    | Cl   | SO3  | K2O  | Al2O3 | H2O  | Total |
|---------|---------|---------------|-------|------|-------|-------|------|------|------|------|------|------|------|------|-------|------|-------|
| 6AB-01  | Dentin  |               | 28.61 | 0.93 | 16.16 | 40.32 | 0.27 | 0.32 | 0.11 | 0.45 | 1.79 | 0.02 | 0.41 | 0.00 | 0.05  | 0.58 | 90.02 |
| 6AB-02  | Dentin  |               | 27.56 | 0.93 | 17.44 | 39.60 | 0.29 | 0.29 | 0.10 | 0.57 | 1.64 | 0.04 | 0.42 | 0.00 | 0.00  | 0.62 | 89.48 |
| 6AB-03  | Dentin  |               | 37.28 | 0.00 | 0.18  | 49.66 | 0.29 | 0.00 | 0.09 | 1.09 | 0.68 | 0.14 | 0.44 | 0.04 | 0.03  | 1.21 | 91.13 |
| 6AB-04  | Enamel  |               | 37.14 | 0.05 | 0.14  | 50.10 | 0.26 | 0.00 | 0.07 | 1.05 | 0.58 | 0.19 | 0.44 | 0.02 | 0.00  | 1.24 | 91.26 |
| 6AB-05  | Enamel  |               | 37.44 | 0.00 | 0.12  | 50.38 | 0.27 | 0.00 | 0.07 | 1.01 | 0.52 | 0.23 | 0.39 | 0.03 | 0.00  | 1.27 | 91.73 |
| 6AB-06  | Enamel  |               | 38.04 | 0.00 | 0.13  | 50.20 | 0.25 | 0.00 | 0.07 | 1.00 | 0.46 | 0.26 | 0.45 | 0.04 | 0.00  | 1.30 | 92.19 |
| 6AB-07  | Enamel  |               | 38.73 | 0.00 | 0.11  | 50.51 | 0.24 | 0.05 | 0.10 | 1.02 | 0.48 | 0.28 | 0.40 | 0.02 | 0.00  | 1.31 | 93.22 |
| 6AB-08  | Enamel  |               | 38.50 | 0.00 | 0.13  | 50.54 | 0.25 | 0.05 | 0.06 | 0.91 | 0.35 | 0.33 | 0.38 | 0.02 | 0.00  | 1.35 | 92.86 |
| 6AB-09  | Enamel  |               | 38.86 | 0.05 | 0.25  | 50.88 | 0.28 | 0.00 | 0.07 | 0.84 | 0.29 | 0.37 | 0.23 | 0.03 | 0.00  | 1.38 | 93.52 |
| 6AB-10  | Enamel  |               | 38.67 | 0.00 | 0.89  | 50.32 | 0.26 | 0.07 | 0.06 | 0.98 | 0.30 | 0.43 | 0.08 | 0.02 | 0.00  | 1.35 | 93.42 |
| 6AB-11  | Enamel  |               | 38.67 | 0.04 | 0.88  | 50.34 | 0.22 | 0.13 | 0.05 | 0.80 | 0.30 | 0.46 | 0.06 | 0.00 | 0.00  | 1.34 | 93.31 |
| 6AB-12  | Enamel  |               | 39.16 | 0.00 | 0.85  | 50.69 | 0.23 | 0.11 | 0.06 | 0.73 | 0.28 | 0.49 | 0.08 | 0.02 | 0.00  | 1.36 | 94.06 |
| 6AB-13  | Enamel  |               | 38.38 | 0.00 | 0.76  | 51.27 | 0.25 | 0.12 | 0.00 | 0.69 | 0.32 | 0.49 | 0.10 | 0.01 | 0.02  | 1.33 | 93.73 |
| 6AB-14  | Enamel  |               | 38.70 | 0.00 | 0.42  | 50.86 | 0.25 | 0.13 | 0.03 | 0.67 | 0.33 | 0.56 | 0.22 | 0.00 | 0.00  | 1.31 | 93.47 |
| 6AB-15  | Enamel  |               | 38.98 | 0.00 | 0.24  | 50.85 | 0.31 | 0.06 | 0.07 | 0.67 | 0.33 | 0.50 | 0.14 | 0.01 | 0.00  | 1.33 | 93.47 |
| 6AB-16  | Cement  |               | 33.97 | 0.11 | 5.53  | 46.14 | 0.13 | 0.78 | 0.17 | 0.76 | 2.49 | 0.02 | 0.21 | 0.03 | 0.05  | 0.34 | 90.74 |
| 6AB-17  | Cement  |               | 33.29 | 0.21 | 6.56  | 45.82 | 0.13 | 0.63 | 0.19 | 0.65 | 2.37 | 0.00 | 0.27 | 0.01 | 0.00  | 0.39 | 90.52 |
| 6AB-18  | Enamel  |               | 38.60 | 0.00 | 0.43  | 50.74 | 0.30 | 0.10 | 0.05 | 0.64 | 0.26 | 0.53 | 0.09 | 0.03 | 0.00  | 1.34 | 93.10 |
| 6AB-19  | Enamel  |               | 38.49 | 0.00 | 0.60  | 50.44 | 0.25 | 0.13 | 0.07 | 0.79 | 0.31 | 0.49 | 0.14 | 0.03 | 0.00  | 1.32 | 93.07 |
| 6AB-20  | Enamel  |               | 37.76 | 0.07 | 2.35  | 49.55 | 0.24 | 0.10 | 0.05 | 0.79 | 0.30 | 0.47 | 0.11 | 0.00 | 0.02  | 1.32 | 93.13 |
| 6AB-21  | Enamel  |               | 38.72 | 0.06 | 1.80  | 50.54 | 0.23 | 0.12 | 0.03 | 0.78 | 0.32 | 0.48 | 0.09 | 0.04 | 0.00  | 1.34 | 94.56 |
| 6AB-22  | Enamel  |               | 38.76 | 0.00 | 0.07  | 51.56 | 0.26 | 0.06 | 0.04 | 0.77 | 0.31 | 0.44 | 0.18 | 0.03 | 0.00  | 1.35 | 93.82 |
| 6AB-23  | Enamel  |               | 38.78 | 0.00 | 0.38  | 51.12 | 0.25 | 0.11 | 0.03 | 0.90 | 0.23 | 0.37 | 0.06 | 0.02 | 0.02  | 1.40 | 93.67 |
| 6AB-24  | Enamel  |               | 38.50 | 0.00 | 0.09  | 50.80 | 0.28 | 0.00 | 0.03 | 0.86 | 0.39 | 0.33 | 0.31 | 0.04 | 0.00  | 1.33 | 92.97 |
| 6AB-25  | Enamel  |               | 38.30 | 0.00 | 0.00  | 50.66 | 0.33 | 0.00 | 0.05 | 0.93 | 0.40 | 0.31 | 0.35 | 0.00 | 0.00  | 1.33 | 92.65 |
| 6AB-26  | Enamel  |               | 37.75 | 0.00 | 0.00  | 50.69 | 0.35 | 0.00 | 0.06 | 0.91 | 0.34 | 0.28 | 0.35 | 0.02 | 0.00  | 1.35 | 92.10 |
| 6AB-27  | Enamel  |               | 37.82 | 0.00 | 0.11  | 50.37 | 0.34 | 0.00 | 0.08 | 1.00 | 0.38 | 0.25 | 0.40 | 0.02 | 0.00  | 1.34 | 92.12 |
| 6AB-28  | Enamel  |               | 37.77 | 0.00 | 0.07  | 50.47 | 0.35 | 0.06 | 0.07 | 1.14 | 0.40 | 0.21 | 0.38 | 0.02 | 0.00  | 1.34 | 92.29 |
| 6AB-29  | Enamel  |               | 37.39 | 0.00 | 0.00  | 49.84 | 0.33 | 0.00 | 0.09 | 1.05 | 0.43 | 0.18 | 0.50 | 0.03 | 0.00  | 1.32 | 91.16 |
| 6AB-30  | Dentin  |               | 32.27 | 0.51 | 9.31  | 44.53 | 0.27 | 0.37 | 0.13 | 0.50 | 2.19 | 0.02 | 0.26 | 0.00 | 0.00  | 0.46 | 90.81 |

Cat# 028-06 *Hippopotamus sp*

Molar fragment Lake Albert, Nkondo Fm.

Surface Find

E30.8829189

N1.401738233

| Profile | Mineral | Distance (µm) | P2O5  | SiO2 | FeO  | CaO   | MgO  | MnO  | SrO  | Na2O | F    | Cl   | SO3  | K2O  | Al2O3 | Total |
|---------|---------|---------------|-------|------|------|-------|------|------|------|------|------|------|------|------|-------|-------|
| 1AB-01  | Dentin  | 65.5          | 35.32 | 0.06 | 1.05 | 49.66 | 0.08 | 0.79 | 0.08 | 0.60 | 3.26 | 0.02 | 0.41 | 0.00 | 0.18  | 91.51 |
| 1AB-02  | Dentin  | 131           | 36.29 | 0.26 | 1.47 | 49.14 | 0.12 | 0.58 | 0.14 | 0.54 | 2.39 | 0.01 | 0.33 | 0.02 | 0.12  | 91.41 |
| 1AB-03  | Dentin  | 262           | 34.68 | 0.44 | 1.81 | 48.89 | 0.14 | 0.61 | 0.13 | 0.54 | 2.50 | 0.01 | 0.33 | 0.00 | 0.26  | 90.35 |
| 1AB-04  | Dentin  | 393           | 35.11 | 0.48 | 1.17 | 49.30 | 0.15 | 0.50 | 0.10 | 0.52 | 2.69 | 0.02 | 0.36 | 0.01 | 0.32  | 90.72 |
| 1AB-05  | Dentin  | 524           | 35.35 | 0.24 | 1.24 | 49.57 | 0.13 | 0.55 | 0.14 | 0.52 | 2.70 | 0.02 | 0.40 | 0.00 | 0.13  | 90.99 |
| 1AB-06  | Dentin  | 655           | 35.71 | 0.37 | 1.30 | 49.38 | 0.14 | 0.69 | 0.13 | 0.63 | 2.56 | 0.01 | 0.33 | 0.01 | 0.18  | 91.45 |
| 1AB-07  | Dentin  | 786           | 32.92 | 1.07 | 6.51 | 45.26 | 0.15 | 0.53 | 0.13 | 0.53 | 2.35 | 0.01 | 0.33 | 0.02 | 0.50  | 90.30 |
| 1AB-08  | Dentin  | 917           | 35.86 | 0.31 | 1.13 | 49.61 | 0.13 | 0.60 | 0.11 | 0.53 | 2.79 | 0.01 | 0.35 | 0.02 | 0.15  | 91.58 |
| 1AB-09  | Dentin  | 1048          | 35.00 | 0.49 | 3.40 | 47.76 | 0.14 | 0.56 | 0.08 | 0.59 | 2.55 | 0.02 | 0.28 | 0.01 | 0.31  | 91.21 |
| 1AB-10  | Dentin  | 1179          | 35.43 | 0.22 | 1.15 | 49.90 | 0.13 | 0.48 | 0.13 | 0.56 | 2.80 | 0.01 | 0.39 | 0.00 | 0.13  | 91.32 |
| 1AB-11  | Dentin  | 1310          | 33.90 | 0.67 | 2.09 | 48.36 | 0.18 | 0.54 | 0.09 | 0.46 | 2.90 | 0.01 | 0.47 | 0.00 | 0.25  | 89.92 |
| 1AB-12  | Dentin  | 1441          | 35.10 | 0.05 | 1.03 | 50.03 | 0.12 | 0.62 | 0.12 | 0.55 | 2.85 | 0.02 | 0.37 | 0.02 | 0.08  | 90.95 |
| 1AB-13  | Dentin  | 1572          | 35.62 | 0.19 | 1.04 | 49.95 | 0.15 | 0.57 | 0.13 | 0.47 | 2.82 | 0.02 | 0.32 | 0.00 | 0.11  | 91.37 |
| 1AB-14  | Dentin  | 1703          | 34.64 | 0.55 | 1.33 | 49.31 | 0.15 | 0.49 | 0.08 | 0.48 | 2.73 | 0.01 | 0.29 | 0.01 | 0.16  | 90.23 |
| 1AB-15  | Dentin  | 1834          | 34.67 | 0.59 | 2.15 | 48.77 | 0.17 | 0.40 | 0.11 | 0.44 | 2.66 | 0.02 | 0.38 | 0.01 | 0.20  | 90.56 |
| 1AB-16  | Dentin  | 1965          | 35.45 | 0.17 | 0.98 | 50.05 | 0.14 | 0.57 | 0.15 | 0.45 | 2.82 | 0.02 | 0.39 | 0.00 | 0.09  | 91.27 |
| 1AB-17  | Dentin  | 2096          | 34.93 | 0.21 | 1.89 | 49.40 | 0.14 | 0.53 | 0.13 | 0.45 | 2.79 | 0.01 | 0.37 | 0.01 | 0.16  | 91.03 |
| 1AB-18  | Dentin  | 2227          | 35.37 | 0.24 | 1.29 | 49.70 | 0.17 | 0.50 | 0.09 | 0.50 | 2.85 | 0.01 | 0.45 | 0.01 | 0.08  | 91.24 |
| 1AB-19  | Dentin  | 2358          | 35.25 | 0.37 | 0.98 | 49.31 | 0.22 | 0.44 | 0.11 | 0.44 | 2.91 | 0.02 | 0.39 | 0.01 | 0.36  | 90.81 |
| 1AB-20  | Dentin  | 2489          | 35.75 | 0.19 | 1.22 | 49.19 | 0.11 | 0.73 | 0.06 | 0.57 | 2.93 | 0.02 | 0.30 | 0.01 | 0.21  | 91.30 |

Cat# 028-06 *Hippopotamus sp*

Molar fragment Lake Albert, Nkondo Fm.

Surface Find

E30.8829189

N1.401738233

| Profile | Mineral | Distance (µm) | P2O5  | SiO2 | FeO  | CaO   | MgO  | MnO  | SrO  | Na2O | F    | Cl   | SO3  | K2O  | Al2O3 | Total |
|---------|---------|---------------|-------|------|------|-------|------|------|------|------|------|------|------|------|-------|-------|
| 1CD-01  | Dentin  | 2527          | 36.91 | 0.03 | 0.60 | 48.89 | 0.25 | 0.43 | 0.13 | 1.15 | 0.87 | 0.09 | 0.30 | 0.02 | 0.07  | 89.73 |
| 1CD-02  | Enamel  | 2394          | 37.63 | 0.01 | 0.44 | 49.42 | 0.22 | 0.33 | 0.10 | 1.13 | 0.51 | 0.18 | 0.21 | 0.00 | 0.02  | 90.20 |
| 1CD-03  | Enamel  | 2261          | 37.56 | 0.02 | 0.71 | 49.57 | 0.19 | 0.32 | 0.03 | 1.09 | 0.48 | 0.21 | 0.21 | 0.01 | 0.03  | 90.42 |
| 1CD-04  | Enamel  | 2128          | 38.01 | 0.05 | 0.56 | 49.65 | 0.24 | 0.46 | 0.07 | 0.98 | 0.67 | 0.20 | 0.25 | 0.03 | 0.09  | 91.24 |
| 1CD-05  | Enamel  | 1995          | 37.48 | 0.06 | 0.39 | 49.79 | 0.22 | 0.40 | 0.08 | 0.94 | 0.62 | 0.22 | 0.23 | 0.04 | 0.03  | 90.50 |
| 1CD-06  | Enamel  | 1862          | 38.25 | 0.05 | 0.38 | 49.83 | 0.20 | 0.41 | 0.07 | 0.94 | 0.54 | 0.24 | 0.29 | 0.01 | 0.02  | 91.23 |
| 1CD-07  | Enamel  | 1729          | 38.27 | 0.08 | 0.37 | 50.08 | 0.21 | 0.39 | 0.10 | 0.82 | 0.77 | 0.25 | 0.25 | 0.03 | 0.02  | 91.64 |
| 1CD-08  | Enamel  | 1596          | 37.57 | 0.04 | 0.31 | 50.27 | 0.20 | 0.42 | 0.07 | 0.80 | 0.72 | 0.28 | 0.26 | 0.03 | 0.03  | 90.99 |
| 1CD-09  | Enamel  | 1463          | 37.78 | 0.04 | 0.19 | 50.58 | 0.19 | 0.44 | 0.06 | 0.80 | 0.66 | 0.29 | 0.24 | 0.03 | 0.04  | 91.32 |
| 1CD-10  | Enamel  | 1330          | 38.60 | 0.01 | 0.24 | 50.74 | 0.18 | 0.52 | 0.10 | 0.74 | 0.64 | 0.30 | 0.20 | 0.02 | 0.01  | 92.31 |
| 1CD-11  | Enamel  | 1197          | 38.46 | 0.05 | 0.20 | 50.86 | 0.19 | 0.44 | 0.07 | 0.76 | 0.69 | 0.32 | 0.23 | 0.00 | 0.01  | 92.27 |
| 1CD-12  | Enamel  | 1064          | 38.62 | 0.00 | 0.33 | 50.81 | 0.19 | 0.46 | 0.06 | 0.72 | 0.93 | 0.32 | 0.22 | 0.00 | 0.05  | 92.70 |
| 1CD-13  | Enamel  | 931           | 38.92 | 0.02 | 0.42 | 50.39 | 0.19 | 0.46 | 0.11 | 0.76 | 0.57 | 0.37 | 0.30 | 0.00 | 0.03  | 92.51 |
| 1CD-14  | Enamel  | 798           | 38.83 | 0.07 | 0.42 | 50.89 | 0.14 | 0.23 | 0.05 | 0.70 | 0.48 | 0.42 | 0.12 | 0.01 | 0.05  | 92.40 |
| 1CD-15  | Enamel  | 665           | 38.79 | 0.15 | 0.38 | 50.85 | 0.17 | 0.21 | 0.10 | 0.69 | 0.58 | 0.42 | 0.21 | 0.01 | 0.13  | 92.69 |
| 1CD-16  | Enamel  | 532           | 38.10 | 0.48 | 0.44 | 51.00 | 0.15 | 0.17 | 0.05 | 0.67 | 0.49 | 0.49 | 0.17 | 0.02 | 0.13  | 92.36 |
| 1CD-17  | Enamel  | 399           | 38.40 | 0.29 | 0.65 | 51.03 | 0.14 | 0.16 | 0.06 | 0.64 | 0.57 | 0.50 | 0.19 | 0.00 | 0.11  | 92.72 |
| 1CD-18  | Enamel  | 266           | 39.45 | 0.05 | 0.95 | 50.92 | 0.19 | 0.17 | 0.05 | 0.60 | 0.65 | 0.54 | 0.20 | 0.00 | 0.05  | 93.82 |
| 1CD-19  | Enamel  | 133           | 38.21 | 0.46 | 1.08 | 51.01 | 0.17 | 0.05 | 0.04 | 0.50 | 0.55 | 0.62 | 0.21 | 0.01 | 0.19  | 93.09 |
| 1CD-20  | Dentin  | 67            | 38.07 | 0.09 | 0.29 | 50.75 | 0.10 | 0.22 | 0.00 | 0.59 | 1.13 | 0.56 | 0.25 | 0.00 | 0.04  | 92.08 |

Cat# 027-06 *Hippopotamus* sp

Molar fragment Lake Albert, Nkondo Fm.

Surface Find

E30.8817553

N1.40699002

| Profile | Mineral | Distance<br>( $\mu$ m) | P2O5  | SiO2 | FeO  | CaO   | MgO  | MnO  | SrO  | Na2O | F    | Cl   | SO3  | K2O  | Al2O3 | Total |
|---------|---------|------------------------|-------|------|------|-------|------|------|------|------|------|------|------|------|-------|-------|
| 1AB-01  | Enamel  | 0                      | 39.27 | 0.07 | 0.34 | 51.43 | 0.19 | 0.09 | 0.06 | 0.81 | 0.21 | 0.48 | 0.04 | 0.01 | 0.01  | 93.02 |
| 1AB-02  | Enamel  | 164                    | 39.24 | 0.04 | 0.31 | 51.25 | 0.18 | 0.07 | 0.06 | 0.78 | 0.11 | 0.45 | 0.01 | 0.01 | 0.00  | 92.51 |
| 1AB-03  | Enamel  | 328                    | 38.73 | 0.02 | 0.33 | 51.50 | 0.21 | 0.07 | 0.05 | 0.85 | 0.16 | 0.42 | 0.07 | 0.03 | 0.02  | 92.47 |
| 1AB-04  | Enamel  | 492                    | 38.42 | 0.01 | 0.30 | 50.94 | 0.20 | 0.09 | 0.08 | 0.80 | 0.16 | 0.42 | 0.22 | 0.01 | 0.00  | 91.64 |
| 1AB-05  | Enamel  | 656                    | 38.78 | 0.01 | 0.37 | 51.12 | 0.20 | 0.08 | 0.08 | 0.90 | 0.19 | 0.37 | 0.02 | 0.01 | 0.00  | 92.11 |
| 1AB-06  | Enamel  | 820                    | 38.35 | 0.02 | 0.28 | 51.19 | 0.19 | 0.04 | 0.05 | 0.84 | 0.19 | 0.36 | 0.00 | 0.01 | 0.00  | 91.51 |
| 1AB-07  | Enamel  | 984                    | 38.95 | 0.03 | 0.36 | 51.20 | 0.22 | 0.10 | 0.06 | 0.91 | 0.14 | 0.34 | 0.03 | 0.03 | 0.00  | 92.35 |
| 1AB-08  | Enamel  | 1148                   | 38.24 | 0.04 | 0.38 | 50.94 | 0.20 | 0.08 | 0.02 | 0.90 | 0.16 | 0.32 | 0.03 | 0.04 | 0.02  | 91.38 |
| 1AB-09  | Enamel  | 1312                   | 38.67 | 0.01 | 0.42 | 50.68 | 0.24 | 0.08 | 0.04 | 0.91 | 0.18 | 0.31 | 0.02 | 0.01 | 0.00  | 91.57 |
| 1AB-10  | Enamel  | 1476                   | 38.02 | 0.02 | 0.41 | 50.81 | 0.21 | 0.12 | 0.05 | 0.95 | 0.25 | 0.27 | 0.02 | 0.02 | 0.00  | 91.14 |
| 1AB-11  | Enamel  | 1640                   | 38.86 | 0.03 | 0.48 | 50.51 | 0.20 | 0.08 | 0.05 | 0.99 | 0.24 | 0.24 | 0.02 | 0.02 | 0.00  | 91.71 |
| 1AB-12  | Enamel  | 1804                   | 37.57 | 0.05 | 0.38 | 50.45 | 0.22 | 0.12 | 0.09 | 1.04 | 0.12 | 0.22 | 0.03 | 0.02 | 0.01  | 90.31 |
| 1AB-13  | Enamel  | 1968                   | 38.00 | 0.04 | 0.46 | 50.19 | 0.25 | 0.09 | 0.05 | 1.16 | 0.25 | 0.19 | 0.03 | 0.02 | 0.00  | 90.72 |
| 1AB-14  | Enamel  | 2132                   | 37.49 | 0.00 | 0.40 | 49.68 | 0.20 | 0.11 | 0.08 | 1.17 | 0.40 | 0.15 | 0.08 | 0.02 | 0.00  | 89.77 |
| 1AB-15  | Enamel  | 2296                   | 37.52 | 0.02 | 0.40 | 49.93 | 0.21 | 0.16 | 0.05 | 1.29 | 0.43 | 0.13 | 0.04 | 0.02 | 0.00  | 90.18 |
| 1AB-16  | Dentin  | 2460                   | 35.84 | 0.07 | 1.37 | 51.19 | 0.27 | 0.24 | 0.15 | 0.46 | 2.47 | 0.04 | 0.29 | 0.00 | 0.00  | 92.38 |
| 1AB-17  | Dentin  | 2624                   | 34.61 | 0.10 | 1.90 | 50.65 | 0.21 | 0.47 | 0.15 | 0.39 | 2.44 | 0.02 | 0.24 | 0.00 | 0.04  | 91.22 |
| 1AB-18  | Dentin  | 2788                   | 34.55 | 0.16 | 2.34 | 50.83 | 0.20 | 0.17 | 0.17 | 0.40 | 2.56 | 0.02 | 0.19 | 0.00 | 0.11  | 91.70 |
| 1AB-19  | Dentin  | 2952                   | 35.31 | 0.15 | 2.49 | 50.33 | 0.20 | 0.27 | 0.11 | 0.40 | 2.42 | 0.02 | 0.21 | 0.00 | 0.19  | 92.09 |
| 1AB-20  | Dentin  | 3116                   | 35.63 | 0.07 | 1.21 | 51.26 | 0.23 | 0.29 | 0.18 | 0.46 | 2.47 | 0.02 | 0.24 | 0.00 | 0.23  | 92.28 |

Cat# 027-06 *Hippopotamus sp*

Molar fragment Lake Albert, Nkondo Fm.

Surface Find

E30.8817553

N1.40699002

| Profile | Mineral | Distance<br>( $\mu\text{m}$ ) | P2O5  | SiO2 | FeO  | CaO   | MgO  | MnO  | SrO  | Na2O | F    | Cl   | SO3  | K2O  | Al2O3 | Total |
|---------|---------|-------------------------------|-------|------|------|-------|------|------|------|------|------|------|------|------|-------|-------|
| 2CD-01  | Enamel  | 0                             | 31.42 | 0.55 | 6.40 | 39.34 | 0.14 | 0.07 | 0.00 | 0.49 | 0.21 | 0.50 | 0.12 | 0.00 | 0.29  | 79.54 |
| 2CD-02  | Enamel  | 174                           | 36.25 | 0.05 | 0.63 | 47.24 | 0.15 | 0.02 | 0.03 | 0.56 | 0.18 | 0.55 | 0.00 | 0.04 | 0.04  | 85.75 |
| 2CD-03  | Enamel  | 348                           | 39.29 | 0.03 | 0.46 | 50.92 | 0.15 | 0.08 | 0.05 | 0.74 | 0.23 | 0.55 | 0.04 | 0.05 | 0.01  | 92.60 |
| 2CD-04  | Enamel  | 522                           | 38.05 | 0.04 | 1.08 | 50.84 | 0.13 | 0.13 | 0.06 | 0.75 | 0.28 | 0.49 | 0.03 | 0.02 | 0.01  | 91.91 |
| 2CD-05  | Enamel  | 696                           | 38.71 | 0.07 | 1.25 | 50.90 | 0.20 | 0.07 | 0.02 | 0.85 | 0.22 | 0.44 | 0.03 | 0.02 | 0.00  | 92.78 |
| 2CD-06  | Enamel  | 870                           | 38.57 | 0.03 | 1.12 | 50.94 | 0.16 | 0.16 | 0.07 | 0.77 | 0.25 | 0.42 | 0.04 | 0.02 | 0.00  | 92.54 |
| 2CD-07  | Enamel  | 1044                          | 38.70 | 0.03 | 0.56 | 50.95 | 0.23 | 0.09 | 0.02 | 0.74 | 0.15 | 0.39 | 0.06 | 0.04 | 0.00  | 91.96 |
| 2CD-08  | Enamel  | 1218                          | 39.17 | 0.01 | 0.62 | 51.18 | 0.20 | 0.10 | 0.06 | 0.83 | 0.23 | 0.37 | 0.02 | 0.00 | 0.01  | 92.80 |
| 2CD-09  | Enamel  | 1392                          | 39.10 | 0.03 | 0.51 | 50.62 | 0.19 | 0.08 | 0.10 | 0.92 | 0.20 | 0.34 | 0.03 | 0.03 | 0.02  | 92.15 |
| 2CD-10  | Enamel  | 1566                          | 38.51 | 0.01 | 0.59 | 50.65 | 0.20 | 0.09 | 0.12 | 0.94 | 0.20 | 0.31 | 0.00 | 0.02 | 0.00  | 91.63 |
| 2CD-11  | Enamel  | 1740                          | 38.96 | 0.03 | 0.56 | 50.64 | 0.24 | 0.13 | 0.06 | 0.92 | 0.22 | 0.29 | 0.03 | 0.04 | 0.00  | 92.12 |
| 2CD-12  | Enamel  | 1914                          | 37.73 | 0.04 | 0.77 | 50.46 | 0.21 | 0.17 | 0.07 | 0.97 | 0.21 | 0.28 | 0.00 | 0.02 | 0.00  | 90.93 |
| 2CD-13  | Enamel  | 2088                          | 37.55 | 0.03 | 0.48 | 50.47 | 0.22 | 0.19 | 0.07 | 1.11 | 0.22 | 0.23 | 0.00 | 0.01 | 0.02  | 90.59 |
| 2CD-14  | Enamel  | 2262                          | 38.73 | 0.03 | 0.57 | 50.15 | 0.23 | 0.11 | 0.04 | 1.10 | 0.25 | 0.22 | 0.04 | 0.03 | 0.00  | 91.49 |
| 2CD-15  | Enamel  | 2436                          | 37.36 | 0.04 | 0.55 | 50.17 | 0.21 | 0.10 | 0.03 | 1.11 | 0.26 | 0.20 | 0.05 | 0.03 | 0.04  | 90.14 |
| 2CD-16  | Enamel  | 2610                          | 38.09 | 0.01 | 0.55 | 49.51 | 0.23 | 0.24 | 0.07 | 1.18 | 0.27 | 0.16 | 0.00 | 0.05 | 0.00  | 90.36 |
| 2CD-17  | Dentin  | 2784                          | 34.84 | 0.15 | 2.85 | 50.32 | 0.22 | 0.28 | 0.16 | 0.45 | 2.33 | 0.04 | 0.18 | 0.00 | 0.06  | 91.89 |
| 2CD-18  | Dentin  | 2958                          | 35.37 | 0.14 | 1.41 | 50.90 | 0.26 | 0.56 | 0.18 | 0.41 | 2.38 | 0.03 | 0.22 | 0.00 | 0.06  | 91.92 |
| 2CD-19  | Dentin  | 3132                          | 36.28 | 0.05 | 0.76 | 51.50 | 0.24 | 0.22 | 0.15 | 0.45 | 2.55 | 0.02 | 0.15 | 0.01 | 0.00  | 92.38 |
| 2CD-20  | Dentin  | 3306                          | 34.64 | 0.15 | 1.18 | 50.74 | 0.25 | 0.93 | 0.15 | 0.43 | 2.47 | 0.02 | 0.14 | 0.00 | 0.04  | 91.16 |

**GPS165** *Hippopotamus sp* Molar fragment (L) Lake Albert, Nyabusosi Fm, Kagusa Mb Surface Find E30°18,597 N0°59,238

| Profile | Mineral | Distance (µm) | P2O5  | SiO2 | FeO  | CaO   | MgO  | MnO  | SrO  | Na2O | F    | Cl   | SO3  | K2O  | Al2O3 | Total |
|---------|---------|---------------|-------|------|------|-------|------|------|------|------|------|------|------|------|-------|-------|
| 1AB-01  | Enamel  | 95            | 38.46 | 0.39 | 0.37 | 50.46 | 0.17 | 0.63 | 0.07 | 0.82 | 0.43 | 0.40 | 0.22 | 0.02 | 0.09  | 92.53 |
| 1AB-02  | Enamel  | 190           | 38.14 | 0.14 | 0.22 | 50.65 | 0.21 | 0.18 | 0.04 | 0.68 | 0.40 | 0.40 | 0.22 | 0.02 | 0.03  | 91.33 |
| 1AB-03  | Enamel  | 380           | 38.43 | 0.04 | 0.16 | 50.73 | 0.22 | 0.12 | 0.08 | 0.77 | 0.30 | 0.37 | 0.19 | 0.03 | 0.04  | 91.48 |
| 1AB-04  | Enamel  | 570           | 38.12 | 0.01 | 0.18 | 50.52 | 0.23 | 0.14 | 0.04 | 0.80 | 0.41 | 0.34 | 0.23 | 0.00 | 0.03  | 91.06 |
| 1AB-05  | Enamel  | 760           | 37.98 | 0.14 | 0.36 | 50.33 | 0.20 | 0.29 | 0.08 | 0.78 | 0.40 | 0.31 | 0.19 | 0.02 | 0.05  | 91.13 |
| 1AB-06  | Enamel  | 950           | 37.77 | 0.05 | 0.11 | 50.28 | 0.20 | 0.13 | 0.09 | 0.89 | 0.44 | 0.30 | 0.19 | 0.01 | 0.02  | 90.48 |
| 1AB-07  | Enamel  | 1140          | 38.23 | 0.01 | 0.11 | 50.21 | 0.23 | 0.05 | 0.05 | 0.97 | 0.43 | 0.28 | 0.20 | 0.00 | 0.01  | 90.78 |
| 1AB-08  | Enamel  | 1330          | 37.79 | 0.02 | 0.14 | 50.88 | 0.25 | 0.18 | 0.11 | 0.98 | 0.54 | 0.24 | 0.25 | 0.00 | 0.05  | 91.43 |
| 1AB-09  | Enamel  | 1520          | 38.06 | 0.08 | 0.18 | 50.48 | 0.25 | 0.19 | 0.08 | 0.97 | 0.53 | 0.25 | 0.26 | 0.04 | 0.00  | 91.36 |
| 1AB-10  | Enamel  | 1710          | 37.34 | 0.10 | 0.23 | 50.35 | 0.27 | 0.07 | 0.12 | 0.98 | 0.54 | 0.22 | 0.22 | 0.01 | 0.01  | 90.47 |
| 1AB-11  | Enamel  | 1900          | 37.12 | 0.42 | 0.54 | 49.90 | 0.27 | 0.62 | 0.11 | 1.04 | 0.56 | 0.20 | 0.23 | 0.01 | 0.08  | 91.12 |
| 1AB-12  | Enamel  | 2090          | 37.02 | 0.00 | 0.11 | 50.70 | 0.26 | 0.13 | 0.06 | 1.02 | 0.53 | 0.19 | 0.23 | 0.02 | 0.03  | 90.31 |
| 1AB-13  | Enamel  | 2280          | 37.29 | 0.07 | 0.26 | 49.91 | 0.32 | 0.15 | 0.08 | 1.12 | 0.40 | 0.18 | 0.25 | 0.02 | 0.02  | 90.08 |
| 1AB-14  | Enamel  | 2470          | 37.81 | 0.09 | 0.26 | 50.26 | 0.26 | 0.24 | 0.09 | 1.16 | 0.30 | 0.15 | 0.12 | 0.03 | 0.01  | 90.77 |
| 1AB-15  | Dentin  | 2660          | 33.04 | 0.44 | 0.65 | 47.29 | 0.20 | 0.24 | 0.22 | 0.54 | 2.11 | 0.07 | 0.88 | 0.00 | 0.08  | 85.76 |
| 1AB-16  | Dentin  | 2850          | 33.75 | 0.57 | 0.76 | 48.38 | 0.17 | 0.24 | 0.20 | 0.60 | 2.13 | 0.06 | 0.79 | 0.00 | 0.12  | 87.77 |
| 1AB-17  | Dentin  | 3040          | 33.02 | 1.50 | 1.13 | 46.86 | 0.24 | 0.14 | 0.17 | 0.55 | 2.11 | 0.06 | 0.66 | 0.01 | 0.08  | 86.53 |
| 1AB-19  | Dentin  | 3420          | 31.74 | 1.04 | 1.14 | 45.86 | 0.20 | 0.23 | 0.21 | 0.54 | 1.93 | 0.05 | 0.83 | 0.00 | 0.03  | 83.80 |
| 1AB-20  | Dentin  | 3610          | 34.95 | 0.39 | 1.10 | 49.47 | 0.19 | 0.58 | 0.20 | 0.55 | 2.18 | 0.05 | 0.77 | 0.02 | 0.01  | 90.47 |



GPS165 *Hippopotamus sp*

Molar fragment (L) Lake Albert, Nyabusosi Fm, Kagusa Mb Surface Find

E30°18,597

N0°59,238

| Profile | Mineral | Distance<br>( $\mu\text{m}$ ) | P2O5  | SiO2 | FeO  | CaO   | MgO  | MnO  | SrO  | Na2O | F    | Cl   | SO3  | K2O  | Al2O3 | Total |
|---------|---------|-------------------------------|-------|------|------|-------|------|------|------|------|------|------|------|------|-------|-------|
| 1CD-01  | Enamel  | 27                            | 38.20 | 0.06 | 0.17 | 51.56 | 0.20 | 0.06 | 0.05 | 0.77 | 0.29 | 0.40 | 0.20 | 0.00 | 0.06  | 92.02 |
| 1CD-02  | Enamel  | 54                            | 38.32 | 0.11 | 0.21 | 50.94 | 0.22 | 0.19 | 0.04 | 0.78 | 0.32 | 0.41 | 0.19 | 0.01 | 0.06  | 91.80 |
| 1CD-03  | Enamel  | 108                           | 38.47 | 0.34 | 0.37 | 50.54 | 0.18 | 0.59 | 0.03 | 0.84 | 0.35 | 0.38 | 0.21 | 0.04 | 0.07  | 92.40 |
| 1CD-04  | Enamel  | 162                           | 37.32 | 0.26 | 0.31 | 50.17 | 0.24 | 0.48 | 0.06 | 0.79 | 0.30 | 0.34 | 0.19 | 0.02 | 0.05  | 90.52 |
| 1CD-05  | Enamel  | 216                           | 38.30 | 0.18 | 0.27 | 50.45 | 0.22 | 0.36 | 0.09 | 0.84 | 0.39 | 0.36 | 0.18 | 0.00 | 0.03  | 91.67 |
| 1CD-06  | Enamel  | 270                           | 38.76 | 0.02 | 0.18 | 50.76 | 0.20 | 0.14 | 0.05 | 0.78 | 0.38 | 0.35 | 0.19 | 0.03 | 0.02  | 91.87 |
| 1CD-07  | Enamel  | 324                           | 38.26 | 0.06 | 0.14 | 50.99 | 0.25 | 0.11 | 0.08 | 0.84 | 0.39 | 0.35 | 0.21 | 0.01 | 0.03  | 91.72 |
| 1CD-08  | Enamel  | 378                           | 38.51 | 0.07 | 0.18 | 50.97 | 0.20 | 0.23 | 0.10 | 0.89 | 0.41 | 0.33 | 0.20 | 0.05 | 0.01  | 92.15 |
| 1CD-09  | Enamel  | 432                           | 38.09 | 0.03 | 0.18 | 50.60 | 0.20 | 0.11 | 0.09 | 0.85 | 0.37 | 0.32 | 0.17 | 0.00 | 0.02  | 91.04 |
| 1CD-10  | Enamel  | 486                           | 37.12 | 0.22 | 0.29 | 50.22 | 0.25 | 0.36 | 0.04 | 0.79 | 0.46 | 0.31 | 0.21 | 0.01 | 0.05  | 90.34 |
| 1CD-11  | Enamel  | 540                           | 38.25 | 0.00 | 0.10 | 50.64 | 0.26 | 0.15 | 0.05 | 0.77 | 0.51 | 0.30 | 0.24 | 0.01 | 0.00  | 91.28 |
| 1CD-12  | Enamel  | 594                           | 37.14 | 0.60 | 0.51 | 49.80 | 0.27 | 0.96 | 0.08 | 0.86 | 0.40 | 0.29 | 0.22 | 0.04 | 0.10  | 91.28 |
| 1CD-13  | Enamel  | 648                           | 37.79 | 0.06 | 0.21 | 50.46 | 0.22 | 0.13 | 0.09 | 0.90 | 0.41 | 0.29 | 0.23 | 0.02 | 0.02  | 90.84 |
| 1CD-14  | Enamel  | 702                           | 37.22 | 0.43 | 0.42 | 50.11 | 0.27 | 0.97 | 0.10 | 0.93 | 0.47 | 0.28 | 0.21 | 0.00 | 0.08  | 91.48 |
| 1CD-15  | Enamel  | 756                           | 37.79 | 0.47 | 0.46 | 50.06 | 0.24 | 1.00 | 0.08 | 0.93 | 0.50 | 0.26 | 0.20 | 0.02 | 0.06  | 92.08 |

Cat# 032-06 *Hippopotamus sp*

Molar fragment Lake Albert, Nkondo Fm.

Surface Find

E30.8960314

N1.41516716

| Profile | Mineral | Distance (µm) | P2O5  | SiO2 | FeO  | CaO   | MgO  | MnO  | SrO  | Na2O | F    | Cl   | SO3  | K2O  | Al2O3 | Total |
|---------|---------|---------------|-------|------|------|-------|------|------|------|------|------|------|------|------|-------|-------|
| 1AB-01  | Enamel  | 0             | 35.48 | 0.27 | 0.68 | 44.77 | 0.12 | 0.13 | 0.01 | 0.51 | 0.22 | 0.57 | 0.11 | 0.02 | 0.04  | 82.92 |
| 1AB-02  | Enamel  | 140           | 39.13 | 0.03 | 0.35 | 50.93 | 0.17 | 0.15 | 0.06 | 0.66 | 0.18 | 0.56 | 0.03 | 0.02 | 0.03  | 92.29 |
| 1AB-03  | Enamel  | 280           | 38.91 | 0.04 | 0.58 | 50.75 | 0.10 | 0.21 | 0.08 | 0.65 | 0.11 | 0.53 | 0.03 | 0.01 | 0.02  | 92.02 |
| 1AB-04  | Enamel  | 420           | 39.10 | 0.02 | 0.61 | 51.09 | 0.18 | 0.34 | 0.07 | 0.70 | 0.18 | 0.49 | 0.01 | 0.03 | 0.04  | 92.86 |
| 1AB-05  | Enamel  | 560           | 39.18 | 0.02 | 0.63 | 50.74 | 0.19 | 0.30 | 0.03 | 0.81 | 0.17 | 0.45 | 0.03 | 0.03 | 0.02  | 92.57 |
| 1AB-06  | Enamel  | 700           | 39.97 | 0.00 | 0.68 | 50.85 | 0.17 | 0.28 | 0.07 | 0.82 | 0.22 | 0.42 | 0.00 | 0.00 | 0.04  | 93.52 |
| 1AB-07  | Enamel  | 840           | 38.97 | 0.01 | 0.63 | 50.82 | 0.24 | 0.30 | 0.05 | 0.82 | 0.14 | 0.42 | 0.03 | 0.02 | 0.05  | 92.51 |
| 1AB-08  | Enamel  | 980           | 39.71 | 0.03 | 0.65 | 50.72 | 0.18 | 0.36 | 0.05 | 0.74 | 0.16 | 0.36 | 0.03 | 0.03 | 0.02  | 93.04 |
| 1AB-09  | Enamel  | 1120          | 38.85 | 0.02 | 0.71 | 50.50 | 0.19 | 0.29 | 0.06 | 0.77 | 0.17 | 0.34 | 0.02 | 0.02 | 0.06  | 92.03 |
| 1AB-10  | Enamel  | 1260          | 39.52 | 0.03 | 0.64 | 50.21 | 0.21 | 0.34 | 0.08 | 0.88 | 0.20 | 0.34 | 0.03 | 0.02 | 0.00  | 92.51 |
| 1AB-11  | Enamel  | 1400          | 39.96 | 0.04 | 0.75 | 50.44 | 0.18 | 0.28 | 0.09 | 0.91 | 0.16 | 0.29 | 0.01 | 0.00 | 0.00  | 93.11 |
| 1AB-12  | Enamel  | 1540          | 38.86 | 0.00 | 0.70 | 50.04 | 0.22 | 0.38 | 0.04 | 0.94 | 0.11 | 0.29 | 0.03 | 0.02 | 0.02  | 91.64 |
| 1AB-13  | Enamel  | 1680          | 39.30 | 0.00 | 0.76 | 50.21 | 0.22 | 0.34 | 0.09 | 0.87 | 0.16 | 0.28 | 0.01 | 0.00 | 0.00  | 92.24 |
| 1AB-14  | Enamel  | 1820          | 38.65 | 0.00 | 0.79 | 49.84 | 0.17 | 0.30 | 0.05 | 1.03 | 0.18 | 0.25 | 0.07 | 0.03 | 0.02  | 91.37 |
| 1AB-15  | Enamel  | 1960          | 38.12 | 0.02 | 0.75 | 50.19 | 0.22 | 0.40 | 0.03 | 1.02 | 0.16 | 0.23 | 0.02 | 0.04 | 0.03  | 91.25 |
| 1AB-16  | Enamel  | 2100          | 39.48 | 0.02 | 0.77 | 50.53 | 0.20 | 0.37 | 0.06 | 1.02 | 0.20 | 0.21 | 0.02 | 0.00 | 0.02  | 92.89 |
| 1AB-17  | Enamel  | 2240          | 38.95 | 0.00 | 0.78 | 49.64 | 0.19 | 0.38 | 0.08 | 1.09 | 0.15 | 0.18 | 0.03 | 0.02 | 0.03  | 91.53 |
| 1AB-18  | Dentin  | 2380          | 37.48 | 0.19 | 1.55 | 49.52 | 0.20 | 0.89 | 0.25 | 0.45 | 1.70 | 0.04 | 0.02 | 0.01 | 0.00  | 92.30 |
| 1AB-19  | Dentin  | 2520          | 36.90 | 0.32 | 2.12 | 48.88 | 0.19 | 1.05 | 0.27 | 0.52 | 1.85 | 0.02 | 0.04 | 0.00 | 0.06  | 92.21 |
| 1AB-20  | Dentin  | 2660          | 37.38 | 0.32 | 1.84 | 49.26 | 0.18 | 0.99 | 0.30 | 0.51 | 1.98 | 0.02 | 0.05 | 0.01 | 0.03  | 92.86 |

Cat# 032-06 *Hippopotamus sp*

Molar fragment Lake Albert, Nkondo Fm.

Surface Find

E30.8960314

N1.41516716

| Profile | Mineral | Distance<br>( $\mu\text{m}$ ) | P2O5  | SiO2 | FeO  | CaO   | MgO  | MnO  | SrO  | Na2O | F    | Cl   | SO3  | K2O  | Al2O3 | Total |
|---------|---------|-------------------------------|-------|------|------|-------|------|------|------|------|------|------|------|------|-------|-------|
| 2AB-01  | Enamel  | 0                             | 32.16 | 0.56 | 0.20 | 40.19 | 0.14 | 0.01 | 0.02 | 0.43 | 0.42 | 0.53 | 0.20 | 0.00 | 0.01  | 74.87 |
| 2AB-02  | Enamel  | 265                           | 39.91 | 0.06 | 0.54 | 51.04 | 0.21 | 0.31 | 0.01 | 0.65 | 0.16 | 0.53 | 0.04 | 0.01 | 0.03  | 93.49 |
| 2AB-03  | Enamel  | 530                           | 40.00 | 0.03 | 0.58 | 50.78 | 0.17 | 0.30 | 0.05 | 0.61 | 0.11 | 0.46 | 0.03 | 0.01 | 0.02  | 93.15 |
| 2AB-04  | Enamel  | 795                           | 39.08 | 0.06 | 0.51 | 50.74 | 0.20 | 0.32 | 0.09 | 0.71 | 0.13 | 0.41 | 0.04 | 0.01 | 0.02  | 92.33 |
| 2AB-05  | Enamel  | 1060                          | 39.83 | 0.02 | 0.67 | 50.67 | 0.21 | 0.26 | 0.05 | 0.79 | 0.15 | 0.37 | 0.01 | 0.03 | 0.03  | 93.11 |
| 2AB-06  | Enamel  | 1325                          | 39.70 | 0.02 | 0.64 | 50.32 | 0.23 | 0.37 | 0.07 | 0.83 | 0.17 | 0.36 | 0.06 | 0.03 | 0.05  | 92.85 |
| 2AB-07  | Enamel  | 1590                          | 38.68 | 0.02 | 0.63 | 50.47 | 0.22 | 0.28 | 0.05 | 0.83 | 0.16 | 0.32 | 0.06 | 0.01 | 0.03  | 91.75 |
| 2AB-08  | Enamel  | 1855                          | 39.45 | 0.00 | 0.54 | 50.88 | 0.19 | 0.32 | 0.07 | 0.90 | 0.18 | 0.30 | 0.02 | 0.01 | 0.03  | 92.90 |
| 2AB-09  | Enamel  | 2120                          | 38.66 | 0.00 | 0.71 | 50.53 | 0.16 | 0.35 | 0.05 | 0.93 | 0.14 | 0.27 | 0.01 | 0.00 | 0.03  | 91.85 |
| 2AB-10  | Enamel  | 2385                          | 38.65 | 0.00 | 0.64 | 50.10 | 0.19 | 0.28 | 0.05 | 0.89 | 0.20 | 0.26 | 0.05 | 0.00 | 0.03  | 91.35 |
| 2AB-11  | Enamel  | 2650                          | 38.87 | 0.00 | 0.72 | 50.05 | 0.25 | 0.34 | 0.09 | 0.97 | 0.26 | 0.23 | 0.02 | 0.00 | 0.01  | 91.80 |
| 2AB-12  | Enamel  | 2915                          | 38.29 | 0.03 | 0.68 | 49.92 | 0.21 | 0.33 | 0.06 | 1.02 | 0.20 | 0.21 | 0.01 | 0.02 | 0.00  | 90.96 |
| 2AB-13  | Enamel  | 3180                          | 39.15 | 0.02 | 0.75 | 50.15 | 0.18 | 0.38 | 0.10 | 1.17 | 0.17 | 0.19 | 0.02 | 0.01 | 0.03  | 92.33 |
| 2AB-14  | Enamel  | 3445                          | 38.30 | 0.00 | 0.81 | 49.50 | 0.20 | 0.51 | 0.06 | 1.08 | 0.19 | 0.17 | 0.02 | 0.03 | 0.03  | 90.91 |
| 2AB-15  | Enamel  | 3710                          | 38.70 | 0.00 | 0.94 | 49.50 | 0.23 | 0.54 | 0.05 | 1.05 | 0.19 | 0.17 | 0.01 | 0.03 | 0.00  | 91.40 |
| 2AB-16  | Enamel  | 3975                          | 37.36 | 0.00 | 1.65 | 47.87 | 0.20 | 0.83 | 0.12 | 1.08 | 0.66 | 0.06 | 0.01 | 0.00 | 0.09  | 89.93 |
| 2AB-17  | dentin  | 4240                          | 36.73 | 0.40 | 2.06 | 48.59 | 0.22 | 0.95 | 0.23 | 0.64 | 1.66 | 0.02 | 0.06 | 0.01 | 0.01  | 91.58 |
| 2AB-18  | dentin  | 4505                          | 36.82 | 0.32 | 2.35 | 48.21 | 0.17 | 1.15 | 0.32 | 0.58 | 1.64 | 0.02 | 0.07 | 0.01 | 0.00  | 91.67 |
| 2AB-19  | dentin  | 4770                          | 36.20 | 0.24 | 2.29 | 48.15 | 0.15 | 1.16 | 0.33 | 0.55 | 1.72 | 0.01 | 0.06 | 0.03 | 0.02  | 90.92 |
| 2AB-20  | dentin  | 5035                          | 36.01 | 0.28 | 2.22 | 48.25 | 0.19 | 1.12 | 0.32 | 0.48 | 1.63 | 0.01 | 0.05 | 0.00 | 0.02  | 90.59 |

Cat# 032-06 *Hippopotamus sp*

Molar fragment Lake Albert, Nkondo Fm.

Surface Find

E30.8960314

N1.41516716

| Profile | Mineral | Distance (µm) | P2O5  | SiO2 | FeO  | CaO   | MgO  | MnO  | SrO  | Na2O | F    | Cl   | SO3  | K2O  | Al2O3 | Total |
|---------|---------|---------------|-------|------|------|-------|------|------|------|------|------|------|------|------|-------|-------|
| 3AB-01  | Enamel  | 0             | 39.22 | 0.01 | 0.65 | 51.06 | 0.13 | 0.27 | 0.02 | 0.54 | 0.19 | 0.64 | 0.03 | 0.00 | 0.00  | 92.75 |
| 3AB-02  | Enamel  | 116           | 39.60 | 0.05 | 0.53 | 51.17 | 0.20 | 0.21 | 0.04 | 0.72 | 0.18 | 0.55 | 0.04 | 0.01 | 0.07  | 93.39 |
| 3AB-03  | Enamel  | 232           | 40.14 | 0.01 | 0.66 | 50.65 | 0.21 | 0.21 | 0.11 | 0.77 | 0.20 | 0.48 | 0.03 | 0.02 | 0.03  | 93.53 |
| 3AB-04  | Enamel  | 348           | 39.35 | 0.00 | 0.67 | 50.49 | 0.26 | 0.37 | 0.04 | 0.81 | 0.10 | 0.41 | 0.00 | 0.02 | 0.04  | 92.55 |
| 3AB-05  | Enamel  | 464           | 39.00 | 0.01 | 0.71 | 50.25 | 0.28 | 0.45 | 0.07 | 0.81 | 0.18 | 0.36 | 0.03 | 0.00 | 0.00  | 92.14 |
| 3AB-06  | Enamel  | 580           | 38.57 | 0.00 | 0.62 | 50.04 | 0.26 | 0.48 | 0.04 | 0.81 | 0.18 | 0.33 | 0.00 | 0.01 | 0.00  | 91.34 |
| 3AB-07  | Enamel  | 696           | 39.31 | 0.00 | 0.76 | 49.72 | 0.23 | 0.43 | 0.07 | 0.91 | 0.21 | 0.29 | 0.01 | 0.02 | 0.00  | 91.96 |
| 3AB-08  | Enamel  | 812           | 38.54 | 0.01 | 0.80 | 49.68 | 0.23 | 0.45 | 0.04 | 0.89 | 0.25 | 0.27 | 0.02 | 0.01 | 0.03  | 91.21 |
| 3AB-09  | Enamel  | 928           | 38.83 | 0.00 | 0.96 | 49.41 | 0.22 | 0.54 | 0.06 | 0.96 | 0.19 | 0.27 | 0.02 | 0.01 | 0.04  | 91.51 |
| 3AB-10  | Enamel  | 1044          | 39.49 | 0.05 | 0.87 | 49.61 | 0.22 | 0.40 | 0.07 | 0.98 | 0.23 | 0.23 | 0.04 | 0.04 | 0.02  | 92.25 |
| 3AB-11  | Enamel  | 1160          | 38.30 | 0.00 | 0.91 | 49.16 | 0.24 | 0.53 | 0.07 | 1.00 | 0.22 | 0.21 | 0.03 | 0.02 | 0.03  | 90.73 |
| 3AB-12  | Enamel  | 1276          | 39.07 | 0.01 | 0.96 | 48.92 | 0.26 | 0.52 | 0.07 | 1.06 | 0.25 | 0.20 | 0.03 | 0.03 | 0.02  | 91.40 |
| 3AB-13  | Enamel  | 1392          | 38.33 | 0.00 | 0.89 | 48.84 | 0.24 | 0.53 | 0.06 | 1.08 | 0.29 | 0.18 | 0.03 | 0.04 | 0.01  | 90.51 |
| 3AB-14  | Enamel  | 1508          | 38.33 | 0.02 | 0.98 | 48.61 | 0.27 | 0.50 | 0.09 | 1.01 | 0.30 | 0.17 | 0.04 | 0.02 | 0.02  | 90.36 |
| 3AB-15  | Enamel  | 1624          | 37.58 | 0.01 | 0.97 | 48.97 | 0.25 | 0.54 | 0.03 | 1.19 | 0.26 | 0.14 | 0.02 | 0.02 | 0.04  | 90.03 |
| 3AB-16  | Enamel  | 1740          | 37.73 | 0.01 | 0.93 | 48.55 | 0.20 | 0.52 | 0.10 | 1.12 | 0.20 | 0.15 | 0.03 | 0.03 | 0.09  | 89.66 |
| 3AB-17  | Dentin  | 1856          | 36.18 | 0.69 | 2.67 | 47.80 | 0.26 | 0.86 | 0.28 | 0.56 | 1.59 | 0.02 | 0.07 | 0.00 | 0.03  | 91.03 |
| 3AB-18  | Dentin  | 1972          | 36.33 | 0.55 | 1.98 | 48.50 | 0.21 | 1.05 | 0.27 | 0.47 | 1.68 | 0.01 | 0.04 | 0.01 | 0.06  | 91.17 |
| 3AB-19  | Dentin  | 2088          | 36.23 | 0.52 | 2.11 | 48.51 | 0.18 | 0.83 | 0.24 | 0.54 | 1.78 | 0.01 | 0.10 | 0.00 | 0.04  | 91.09 |
| 3AB-20  | Dentin  | 2204          | 34.91 | 0.51 | 2.23 | 47.89 | 0.16 | 1.40 | 0.34 | 0.52 | 1.51 | 0.01 | 0.04 | 0.03 | 0.03  | 89.57 |

| Cat# 017-06 <i>Hippopotamus sp</i> |         |               | Molar fragment |      |      | Lake Albert, Warwire Fm. |      |      |      | Surface Find |      |      | E30.8829189 |      | N1.41738233 |       |  |
|------------------------------------|---------|---------------|----------------|------|------|--------------------------|------|------|------|--------------|------|------|-------------|------|-------------|-------|--|
| Profile                            | Mineral | Distance (µm) | P2O5           | SiO2 | FeO  | CaO                      | MgO  | MnO  | SrO  | Na2O         | F    | Cl   | SO3         | K2O  | Al2O3       | Total |  |
| 1AB-01                             | Enamel  | 50            | 29.60          | 0.45 | 0.49 | 35.64                    | 0.11 | 0.12 | 0.00 | 0.30         | 0.26 | 0.50 | 0.16        | 0.00 | 0.28        | 67.91 |  |
| 1AB-02                             | Enamel  | 184           | 34.27          | 0.20 | 3.84 | 41.22                    | 0.11 | 0.05 | 0.00 | 0.49         | 0.44 | 0.48 | 0.07        | 0.01 | 0.21        | 81.40 |  |
| 1AB-03                             | Enamel  | 368           | 38.84          | 0.13 | 1.24 | 50.18                    | 0.11 | 0.05 | 0.00 | 0.62         | 0.73 | 0.45 | 0.34        | 0.01 | 0.36        | 93.05 |  |
| 1AB-04                             | Enamel  | 552           | 38.89          | 0.14 | 0.39 | 50.93                    | 0.17 | 0.15 | 0.03 | 0.72         | 0.82 | 0.41 | 0.40        | 0.03 | 0.29        | 93.36 |  |
| 1AB-05                             | Enamel  | 736           | 39.75          | 0.26 | 0.88 | 50.57                    | 0.21 | 0.15 | 0.01 | 0.74         | 0.52 | 0.39 | 0.22        | 0.00 | 0.18        | 93.87 |  |
| 1AB-06                             | Enamel  | 920           | 39.61          | 0.12 | 0.63 | 50.93                    | 0.25 | 0.06 | 0.05 | 0.82         | 0.38 | 0.36 | 0.22        | 0.04 | 0.07        | 93.52 |  |
| 1AB-07                             | Enamel  | 1104          | 39.37          | 0.09 | 0.70 | 51.01                    | 0.23 | 0.00 | 0.04 | 0.69         | 0.39 | 0.33 | 0.21        | 0.03 | 0.05        | 93.14 |  |
| 1AB-08                             | Enamel  | 1288          | 39.43          | 0.06 | 0.78 | 50.44                    | 0.18 | 0.17 | 0.05 | 0.79         | 0.31 | 0.31 | 0.18        | 0.02 | 0.01        | 92.71 |  |
| 1AB-09                             | Enamel  | 1472          | 38.71          | 0.07 | 0.70 | 50.57                    | 0.20 | 0.13 | 0.08 | 0.81         | 0.43 | 0.30 | 0.18        | 0.03 | 0.07        | 92.27 |  |
| 1AB-10                             | Enamel  | 1656          | 38.52          | 0.05 | 1.02 | 50.09                    | 0.19 | 0.34 | 0.05 | 0.87         | 0.32 | 0.26 | 0.24        | 0.00 | 0.00        | 91.96 |  |
| 1AB-11                             | Enamel  | 1840          | 37.91          | 0.08 | 0.62 | 50.27                    | 0.22 | 0.22 | 0.06 | 0.87         | 0.35 | 0.26 | 0.15        | 0.01 | 0.02        | 91.03 |  |
| 1AB-12                             | Enamel  | 2024          | 38.57          | 0.07 | 0.82 | 50.12                    | 0.22 | 0.28 | 0.08 | 0.95         | 0.24 | 0.24 | 0.10        | 0.01 | 0.02        | 91.72 |  |
| 1AB-13                             | Enamel  | 2208          | 38.29          | 0.06 | 0.53 | 49.63                    | 0.21 | 0.24 | 0.08 | 1.08         | 0.29 | 0.20 | 0.09        | 0.02 | 0.02        | 90.72 |  |
| 1AB-14                             | Enamel  | 2392          | 36.97          | 0.01 | 0.21 | 50.07                    | 0.18 | 0.12 | 0.07 | 1.09         | 0.33 | 0.17 | 0.18        | 0.03 | 0.00        | 89.42 |  |
| 1AB-15                             | Enamel  | 2576          | 37.51          | 0.05 | 0.44 | 49.07                    | 0.25 | 0.15 | 0.07 | 1.14         | 0.50 | 0.13 | 0.14        | 0.03 | 0.01        | 89.48 |  |
| 1AB-16                             | Dentin  | 2760          | 35.44          | 0.07 | 0.38 | 51.28                    | 0.12 | 0.48 | 0.11 | 0.43         | 2.97 | 0.02 | 0.54        | 0.00 | 0.01        | 91.85 |  |
| 1AB-17                             | Dentin  | 2944          | 34.55          | 0.30 | 2.58 | 49.14                    | 0.17 | 0.87 | 0.14 | 0.40         | 2.84 | 0.01 | 0.57        | 0.00 | 0.02        | 91.58 |  |
| 1AB-18                             | Dentin  | 3128          | 35.17          | 0.04 | 0.38 | 50.95                    | 0.11 | 1.00 | 0.12 | 0.49         | 2.87 | 0.00 | 0.57        | 0.01 | 0.02        | 91.71 |  |
| 1AB-19                             | Dentin  | 3312          | 35.04          | 0.16 | 0.54 | 50.87                    | 0.15 | 0.39 | 0.18 | 0.41         | 2.98 | 0.01 | 0.55        | 0.00 | 0.01        | 91.28 |  |
| 1AB-20                             | Dentin  | 3496          | 35.04          | 0.14 | 0.69 | 50.73                    | 0.16 | 0.44 | 0.14 | 0.43         | 3.05 | 0.01 | 0.58        | 0.00 | 0.01        | 91.42 |  |

| Cat# 017-06 <i>Hippopotamus sp</i> |         |               | Molar fragment |      |      | Lake Albert, Warwire Fm. |      |      |      | Surface Find |      | E30.8829189 |      | N1.41738233 |       |       |
|------------------------------------|---------|---------------|----------------|------|------|--------------------------|------|------|------|--------------|------|-------------|------|-------------|-------|-------|
| Profile                            | Mineral | Distance (µm) | P2O5           | SiO2 | FeO  | CaO                      | MgO  | MnO  | SrO  | Na2O         | F    | Cl          | SO3  | K2O         | Al2O3 | Total |
| 2AB-01                             | Enamel  | 50            | 38.43          | 0.18 | 1.25 | 49.65                    | 0.10 | 0.11 | 0.01 | 0.53         | 0.71 | 0.56        | 0.20 | 0.00        | 0.43  | 92.17 |
| 2AB-02                             | Enamel  | 181           | 39.75          | 0.14 | 1.25 | 50.06                    | 0.16 | 0.15 | 0.03 | 0.56         | 0.47 | 0.54        | 0.28 | 0.02        | 0.33  | 93.74 |
| 2AB-03                             | Enamel  | 362           | 38.43          | 0.15 | 1.99 | 49.89                    | 0.18 | 0.08 | 0.07 | 0.60         | 0.43 | 0.50        | 0.29 | 0.01        | 0.20  | 92.82 |
| 2AB-04                             | Enamel  | 543           | 39.18          | 0.07 | 0.96 | 50.51                    | 0.22 | 0.15 | 0.02 | 0.63         | 0.42 | 0.46        | 0.23 | 0.01        | 0.15  | 93.00 |
| 2AB-05                             | Enamel  | 724           | 38.91          | 0.10 | 0.83 | 50.92                    | 0.18 | 0.09 | 0.05 | 0.75         | 0.45 | 0.41        | 0.28 | 0.00        | 0.05  | 93.03 |
| 2AB-06                             | Enamel  | 905           | 39.36          | 0.07 | 0.52 | 50.80                    | 0.18 | 0.18 | 0.07 | 0.72         | 0.42 | 0.39        | 0.27 | 0.00        | 0.04  | 93.00 |
| 2AB-07                             | Enamel  | 1086          | 40.04          | 0.02 | 0.60 | 50.62                    | 0.18 | 0.12 | 0.06 | 0.79         | 0.33 | 0.36        | 0.24 | 0.00        | 0.00  | 93.37 |
| 2AB-08                             | Enamel  | 1267          | 38.98          | 0.03 | 0.23 | 51.10                    | 0.19 | 0.21 | 0.06 | 0.83         | 0.47 | 0.32        | 0.29 | 0.00        | 0.02  | 92.74 |
| 2AB-09                             | Enamel  | 1448          | 38.45          | 0.03 | 0.23 | 49.90                    | 0.23 | 0.24 | 0.09 | 0.79         | 0.63 | 0.30        | 0.43 | 0.02        | 0.01  | 91.34 |
| 2AB-10                             | Enamel  | 1629          | 38.54          | 0.02 | 0.22 | 50.54                    | 0.22 | 0.14 | 0.05 | 0.95         | 0.43 | 0.29        | 0.30 | 0.02        | 0.00  | 91.74 |
| 2AB-11                             | Enamel  | 1810          | 38.65          | 0.01 | 0.17 | 50.28                    | 0.20 | 0.14 | 0.05 | 0.88         | 0.44 | 0.25        | 0.30 | 0.02        | 0.02  | 91.40 |
| 2AB-12                             | Enamel  | 1991          | 38.64          | 0.07 | 0.23 | 49.99                    | 0.22 | 0.13 | 0.03 | 0.92         | 0.45 | 0.24        | 0.25 | 0.02        | 0.02  | 91.22 |
| 2AB-13                             | Enamel  | 2172          | 38.21          | 0.00 | 0.18 | 49.46                    | 0.27 | 0.13 | 0.05 | 1.01         | 0.53 | 0.21        | 0.27 | 0.01        | 0.01  | 90.33 |
| 2AB-14                             | Enamel  | 2353          | 37.78          | 0.03 | 0.35 | 49.66                    | 0.23 | 0.20 | 0.06 | 1.02         | 0.43 | 0.18        | 0.23 | 0.03        | 0.01  | 90.21 |
| 2AB-15                             | Enamel  | 2534          | 37.04          | 0.08 | 0.27 | 49.79                    | 0.23 | 0.11 | 0.06 | 1.09         | 0.37 | 0.18        | 0.20 | 0.01        | 0.00  | 89.43 |
| 2AB-16                             | Dentin  | 2715          | 31.86          | 0.66 | 6.94 | 46.27                    | 0.14 | 0.34 | 0.12 | 0.52         | 2.73 | 0.02        | 0.50 | 0.00        | 0.14  | 90.24 |
| 2AB-17                             | Dentin  | 2896          | 31.26          | 0.50 | 7.46 | 45.71                    | 0.17 | 0.29 | 0.11 | 0.40         | 2.47 | 0.01        | 0.43 | 0.01        | 0.09  | 88.90 |
| 2AB-18                             | Dentin  | 3077          | 31.95          | 0.48 | 7.87 | 45.51                    | 0.10 | 0.33 | 0.16 | 0.36         | 2.40 | 0.01        | 0.41 | 0.01        | 0.11  | 89.69 |
| 2AB-19                             | Dentin  | 3258          | 35.76          | 0.04 | 0.25 | 50.46                    | 0.14 | 0.30 | 0.14 | 0.41         | 2.95 | 0.00        | 0.50 | 0.00        | 0.01  | 90.96 |
| 2AB-20                             | Dentin  | 3439          | 34.62          | 0.17 | 0.32 | 50.80                    | 0.17 | 0.34 | 0.18 | 0.52         | 3.08 | 0.01        | 0.56 | 0.00        | 0.02  | 90.79 |

| Cat# 017-06 <i>Hippopotamus sp</i> |         |               | Molar fragment |      |      | Lake Albert, Warwire Fm. |      |      |      | Surface Find |      |      | E30.8829189 |      | N1.41738233 |       |  |
|------------------------------------|---------|---------------|----------------|------|------|--------------------------|------|------|------|--------------|------|------|-------------|------|-------------|-------|--|
| Profile                            | Mineral | Distance (µm) | P2O5           | SiO2 | FeO  | CaO                      | MgO  | MnO  | SrO  | Na2O         | F    | Cl   | SO3         | K2O  | Al2O3       | Total |  |
| 2CD-01                             | Enamel  | 258           | 38.14          | 0.10 | 0.66 | 50.76                    | 0.10 | 0.37 | 0.01 | 0.50         | 1.12 | 0.45 | 0.42        | 0.01 | 0.09        | 92.74 |  |
| 2CD-02                             | Enamel  | 344           | 38.58          | 0.08 | 0.74 | 50.45                    | 0.12 | 0.16 | 0.04 | 0.62         | 0.90 | 0.45 | 0.46        | 0.00 | 0.04        | 92.64 |  |
| 2CD-03                             | Enamel  | 430           | 37.28          | 0.06 | 0.70 | 50.82                    | 0.14 | 0.22 | 0.00 | 0.59         | 1.05 | 0.40 | 0.52        | 0.00 | 0.03        | 91.80 |  |
| 2CD-04                             | Enamel  | 516           | 37.97          | 0.05 | 0.57 | 50.58                    | 0.11 | 0.24 | 0.04 | 0.58         | 1.11 | 0.37 | 0.60        | 0.01 | 0.02        | 92.23 |  |
| 2CD-05                             | Enamel  | 602           | 37.93          | 0.02 | 0.10 | 50.93                    | 0.15 | 0.20 | 0.05 | 0.67         | 1.08 | 0.35 | 0.48        | 0.01 | 0.00        | 91.96 |  |
| 2CD-06                             | Enamel  | 688           | 38.10          | 0.06 | 0.33 | 50.56                    | 0.13 | 0.10 | 0.01 | 0.69         | 1.11 | 0.35 | 0.47        | 0.01 | 0.05        | 91.97 |  |
| 2CD-07                             | Enamel  | 774           | 38.41          | 0.09 | 0.54 | 49.79                    | 0.13 | 0.44 | 0.01 | 0.70         | 0.93 | 0.35 | 0.46        | 0.02 | 0.00        | 91.87 |  |
| 2CD-08                             | Enamel  | 860           | 38.12          | 0.21 | 0.37 | 50.43                    | 0.16 | 0.12 | 0.00 | 0.73         | 0.70 | 0.34 | 0.38        | 0.01 | 0.10        | 91.67 |  |
| 2CD-09                             | Enamel  | 946           | 39.12          | 0.08 | 0.31 | 50.23                    | 0.18 | 0.14 | 0.04 | 0.73         | 0.65 | 0.35 | 0.33        | 0.01 | 0.00        | 92.18 |  |
| 2CD-10                             | Enamel  | 1032          | 38.66          | 0.12 | 0.43 | 51.07                    | 0.15 | 0.18 | 0.01 | 0.77         | 0.65 | 0.34 | 0.29        | 0.02 | 0.03        | 92.72 |  |
| 2CD-11                             | Enamel  | 1118          | 38.69          | 0.10 | 0.57 | 50.61                    | 0.20 | 0.18 | 0.07 | 0.81         | 0.59 | 0.35 | 0.27        | 0.03 | 0.03        | 92.50 |  |
| 2CD-12                             | Enamel  | 1204          | 38.18          | 0.18 | 0.98 | 50.22                    | 0.19 | 0.09 | 0.04 | 0.81         | 0.45 | 0.36 | 0.27        | 0.01 | 0.02        | 91.78 |  |
| 2CD-13                             | Enamel  | 1290          | 38.49          | 0.09 | 0.76 | 50.57                    | 0.18 | 0.15 | 0.01 | 0.70         | 0.53 | 0.33 | 0.28        | 0.02 | 0.03        | 92.13 |  |
| 2CD-14                             | Enamel  | 1376          | 39.01          | 0.13 | 0.63 | 50.48                    | 0.20 | 0.18 | 0.04 | 0.77         | 0.58 | 0.31 | 0.26        | 0.03 | 0.04        | 92.65 |  |
| 2CD-15                             | Enamel  | 1462          | 38.34          | 0.10 | 0.71 | 50.65                    | 0.17 | 0.10 | 0.08 | 0.79         | 0.35 | 0.34 | 0.18        | 0.03 | 0.00        | 91.84 |  |
| 2CD-16                             | Enamel  | 1548          | 38.17          | 0.07 | 0.70 | 50.32                    | 0.20 | 0.16 | 0.07 | 0.86         | 0.38 | 0.32 | 0.15        | 0.01 | 0.00        | 91.40 |  |
| 2CD-17                             | Enamel  | 1634          | 38.23          | 0.16 | 0.65 | 50.73                    | 0.20 | 0.21 | 0.08 | 0.86         | 0.31 | 0.34 | 0.09        | 0.04 | 0.02        | 91.91 |  |
| 2CD-18                             | Enamel  | 1720          | 38.74          | 0.11 | 0.50 | 49.95                    | 0.22 | 0.18 | 0.05 | 1.80         | 0.32 | 0.98 | 0.12        | 0.03 | 0.00        | 93.00 |  |
| 2CD-19                             | Enamel  | 1806          | 38.89          | 0.06 | 0.44 | 50.56                    | 0.22 | 0.15 | 0.07 | 0.72         | 0.28 | 0.30 | 0.12        | 0.00 | 0.01        | 91.83 |  |
| 2CD-20                             | Enamel  | 1892          | 38.39          | 0.06 | 0.29 | 50.92                    | 0.21 | 0.12 | 0.11 | 0.74         | 0.34 | 0.28 | 0.14        | 0.00 | 0.01        | 91.59 |  |
| 2CD-21                             | Enamel  | 1978          | 39.10          | 0.08 | 0.28 | 50.17                    | 0.20 | 0.16 | 0.07 | 0.84         | 0.35 | 0.25 | 0.12        | 0.01 | 0.00        | 91.63 |  |
| 2CD-22                             | Enamel  | 2064          | 37.80          | 0.07 | 0.59 | 50.12                    | 0.22 | 0.15 | 0.09 | 0.93         | 0.25 | 0.21 | 0.06        | 0.02 | 0.04        | 90.55 |  |
| 2CD-23                             | Enamel  | 2150          | 37.78          | 0.06 | 0.59 | 50.05                    | 0.24 | 0.21 | 0.07 | 0.95         | 0.39 | 0.19 | 0.08        | 0.02 | 0.05        | 90.67 |  |
| 2CD-24                             | Enamel  | 2236          | 36.96          | 0.07 | 0.88 | 49.54                    | 0.28 | 0.21 | 0.08 | 1.00         | 0.38 | 0.18 | 0.12        | 0.03 | 0.01        | 89.72 |  |
| 2CD-25                             | Enamel  | 2322          | 37.49          | 0.00 | 0.21 | 49.97                    | 0.24 | 0.14 | 0.05 | 1.03         | 0.47 | 0.17 | 0.12        | 0.02 | 0.03        | 89.93 |  |
| 2CD-26                             | Enamel  | 2408          | 38.15          | 0.07 | 0.17 | 49.97                    | 0.24 | 0.15 | 0.06 | 0.99         | 0.50 | 0.15 | 0.13        | 0.01 | 0.03        | 90.62 |  |
| 2CD-27                             | Enamel  | 2494          | 37.96          | 0.04 | 0.20 | 49.95                    | 0.20 | 0.15 | 0.09 | 1.01         | 0.44 | 0.13 | 0.16        | 0.01 | 0.02        | 90.35 |  |
| 2CD-28                             | dentin  | 2580          | 35.25          | 0.25 | 3.25 | 48.09                    | 0.15 | 0.30 | 0.17 | 0.85         | 1.56 | 0.06 | 0.24        | 0.02 | 0.06        | 90.25 |  |
| 2CD-29                             | dentin  | 2666          | 31.48          | 0.60 | 9.34 | 44.60                    | 0.20 | 0.42 | 0.10 | 0.43         | 2.71 | 0.02 | 0.53        | 0.01 | 0.18        | 90.61 |  |
| 2CD-30                             | dentin  | 2752          | 33.28          | 0.40 | 5.07 | 47.68                    | 0.15 | 0.31 | 0.12 | 0.47         | 2.78 | 0.02 | 0.64        | 0.01 | 0.14        | 91.05 |  |

Cat# 021-06 *Hippopotamus sp*

Molar fragment Lake Albert, Nkondo Fm.

Surface Find

E30.8988124

N1.41939191

| Profile | Mineral | Distance<br>( $\mu\text{m}$ ) | P2O5  | SiO2 | FeO  | CaO   | MgO  | MnO  | SrO  | Na2O | F    | Cl   | SO3  | K2O  | Al2O3 | Total |
|---------|---------|-------------------------------|-------|------|------|-------|------|------|------|------|------|------|------|------|-------|-------|
| 1AB-01  | Enamel  | 50                            | 36.64 | 0.07 | 2.64 | 47.56 | 0.10 | 1.29 | 0.18 | 0.64 | 1.75 | 0.02 | 0.06 | 0.02 | 0.09  | 91.05 |
| 1AB-02  | Enamel  | 157                           | 36.58 | 0.00 | 2.57 | 46.85 | 0.02 | 1.43 | 0.17 | 0.63 | 1.74 | 0.02 | 0.02 | 0.00 | 0.09  | 90.12 |
| 1AB-03  | Enamel  | 314                           | 37.19 | 0.06 | 2.63 | 47.19 | 0.11 | 1.44 | 0.17 | 0.70 | 1.75 | 0.01 | 0.02 | 0.03 | 0.03  | 91.33 |
| 1AB-04  | Enamel  | 471                           | 37.52 | 0.06 | 2.66 | 47.87 | 0.07 | 1.63 | 0.13 | 0.62 | 1.83 | 0.02 | 0.03 | 0.02 | 0.02  | 92.47 |
| 1AB-05  | Enamel  | 628                           | 37.51 | 0.03 | 1.27 | 48.65 | 0.25 | 0.58 | 0.09 | 1.18 | 0.48 | 0.09 | 0.01 | 0.01 | 0.00  | 90.14 |
| 1AB-06  | Enamel  | 785                           | 38.16 | 0.02 | 1.02 | 49.28 | 0.20 | 0.45 | 0.05 | 1.04 | 0.41 | 0.16 | 0.02 | 0.02 | 0.02  | 90.84 |
| 1AB-07  | Enamel  | 942                           | 38.39 | 0.02 | 0.84 | 49.96 | 0.25 | 0.35 | 0.07 | 1.02 | 0.38 | 0.20 | 0.03 | 0.02 | 0.03  | 91.53 |
| 1AB-08  | Enamel  | 1099                          | 38.40 | 0.02 | 0.84 | 49.82 | 0.21 | 0.54 | 0.04 | 1.02 | 0.31 | 0.24 | 0.00 | 0.01 | 0.01  | 91.47 |
| 1AB-09  | Enamel  | 1256                          | 39.44 | 0.03 | 0.93 | 49.84 | 0.25 | 0.45 | 0.04 | 0.87 | 0.26 | 0.26 | 0.00 | 0.02 | 0.01  | 92.40 |
| 1AB-10  | Enamel  | 1413                          | 38.84 | 0.03 | 0.87 | 50.04 | 0.23 | 0.38 | 0.10 | 0.89 | 0.31 | 0.30 | 0.04 | 0.00 | 0.03  | 92.05 |
| 1AB-11  | Enamel  | 1570                          | 37.91 | 0.19 | 0.90 | 50.23 | 0.24 | 0.22 | 0.01 | 0.89 | 0.28 | 0.32 | 0.07 | 0.02 | 0.00  | 91.28 |
| 1AB-12  | Enamel  | 1727                          | 38.80 | 0.03 | 0.59 | 50.67 | 0.20 | 0.12 | 0.05 | 0.85 | 0.37 | 0.36 | 0.13 | 0.04 | 0.04  | 92.24 |
| 1AB-13  | Enamel  | 1884                          | 38.44 | 0.03 | 0.83 | 50.26 | 0.19 | 0.30 | 0.09 | 0.82 | 0.36 | 0.40 | 0.04 | 0.01 | 0.16  | 91.92 |
| 1AB-14  | Enamel  | 2041                          | 38.64 | 0.04 | 0.75 | 50.09 | 0.15 | 0.41 | 0.11 | 0.82 | 0.41 | 0.41 | 0.04 | 0.04 | 0.27  | 92.17 |
| 1AB-15  | Enamel  | 2198                          | 0.09  | 1.51 | 0.03 | 0.09  | 0.00 | 0.00 | 0.00 | 0.00 | 0.00 | 0.30 | 0.04 | 0.01 | 0.60  | 2.68  |
| 1AB-16  | Enamel  | 2355                          | 38.47 | 0.00 | 0.79 | 50.02 | 0.13 | 0.43 | 0.05 | 0.70 | 0.50 | 0.43 | 0.03 | 0.03 | 0.04  | 91.62 |
| 1AB-17  | Enamel  | 2512                          | 38.40 | 0.00 | 0.78 | 50.32 | 0.15 | 0.30 | 0.09 | 0.78 | 0.28 | 0.41 | 0.01 | 0.03 | 0.00  | 91.54 |
| 1AB-18  | Enamel  | 2669                          | 39.48 | 0.05 | 0.59 | 50.55 | 0.14 | 0.24 | 0.05 | 0.73 | 0.24 | 0.38 | 0.09 | 0.03 | 0.00  | 92.56 |
| 1AB-19  | Enamel  | 2826                          | 39.00 | 0.03 | 0.52 | 50.49 | 0.22 | 0.17 | 0.00 | 0.84 | 0.31 | 0.35 | 0.14 | 0.02 | 0.02  | 92.10 |
| 1AB-20  | Enamel  | 2983                          | 38.78 | 0.03 | 0.52 | 50.36 | 0.20 | 0.13 | 0.07 | 0.86 | 0.28 | 0.31 | 0.16 | 0.01 | 0.03  | 91.74 |
| 1AB-21  | Enamel  | 3140                          | 39.29 | 0.01 | 0.96 | 49.73 | 0.22 | 0.37 | 0.08 | 0.96 | 0.31 | 0.27 | 0.04 | 0.02 | 0.03  | 92.31 |
| 1AB-22  | Enamel  | 3297                          | 37.88 | 0.00 | 0.97 | 50.04 | 0.24 | 0.37 | 0.06 | 0.99 | 0.20 | 0.26 | 0.04 | 0.01 | 0.01  | 91.06 |
| 1AB-23  | Enamel  | 3454                          | 38.94 | 0.05 | 0.94 | 49.82 | 0.27 | 0.55 | 0.09 | 0.89 | 0.28 | 0.24 | 0.00 | 0.04 | 0.00  | 92.10 |
| 1AB-24  | Enamel  | 3611                          | 38.69 | 0.06 | 0.84 | 49.32 | 0.21 | 0.63 | 0.04 | 0.99 | 0.32 | 0.20 | 0.00 | 0.04 | 0.03  | 91.34 |
| 1AB-25  | Enamel  | 3768                          | 37.86 | 0.00 | 0.84 | 48.97 | 0.20 | 0.68 | 0.10 | 1.10 | 0.36 | 0.16 | 0.01 | 0.03 | 0.00  | 90.30 |
| 1AB-26  | Enamel  | 3925                          | 37.73 | 0.00 | 0.95 | 48.55 | 0.23 | 0.68 | 0.05 | 1.16 | 0.33 | 0.14 | 0.04 | 0.05 | 0.05  | 89.96 |
| 1AB-27  | Enamel  | 4082                          | 38.01 | 0.00 | 0.95 | 48.85 | 0.26 | 0.58 | 0.06 | 1.15 | 0.32 | 0.10 | 0.01 | 0.02 | 0.08  | 90.39 |
| 1AB-28  | dentin  | 4239                          | 37.50 | 0.06 | 2.21 | 48.21 | 0.07 | 1.34 | 0.18 | 0.58 | 2.00 | 0.02 | 0.06 | 0.01 | 0.00  | 92.24 |
| 1AB-29  | dentin  | 4396                          | 36.63 | 0.04 | 2.22 | 48.39 | 0.07 | 1.32 | 0.15 | 0.65 | 1.88 | 0.02 | 0.06 | 0.00 | 0.03  | 91.44 |
| 1AB-30  | dentin  | 4553                          | 37.02 | 0.06 | 2.28 | 48.18 | 0.09 | 1.22 | 0.19 | 0.58 | 1.79 | 0.01 | 0.02 | 0.00 | 0.06  | 91.49 |



Cat# 021-06 *Hippopotamus sp*

Molar fragment Lake Albert, Nkondo Fm.

Surface Find

E30.8988124

N1.41939191

| Profile | Mineral | Distance<br>( $\mu\text{m}$ ) | P2O5  | SiO2 | FeO  | CaO   | MgO  | MnO  | SrO  | Na2O | F    | Cl   | SO3  | K2O  | Al2O3 | Total |
|---------|---------|-------------------------------|-------|------|------|-------|------|------|------|------|------|------|------|------|-------|-------|
| 2AB-01  | Enamel  | 40                            | 39.21 | 0.07 | 0.50 | 51.30 | 0.14 | 0.20 | 0.00 | 0.77 | 0.24 | 0.49 | 0.10 | 0.02 | 0.02  | 93.07 |
| 2AB-02  | Enamel  | 87                            | 39.36 | 0.03 | 0.56 | 50.95 | 0.14 | 0.18 | 0.08 | 0.76 | 0.15 | 0.45 | 0.04 | 0.02 | 0.01  | 92.72 |
| 2AB-03  | Enamel  | 174                           | 40.17 | 0.00 | 0.63 | 50.78 | 0.19 | 0.19 | 0.07 | 0.82 | 0.17 | 0.43 | 0.02 | 0.02 | 0.03  | 93.52 |
| 2AB-04  | Enamel  | 261                           | 38.79 | 0.00 | 0.48 | 50.98 | 0.21 | 0.21 | 0.04 | 0.84 | 0.20 | 0.41 | 0.03 | 0.00 | 0.01  | 92.20 |
| 2AB-05  | Enamel  | 348                           | 39.87 | 0.00 | 0.44 | 50.74 | 0.13 | 0.23 | 0.02 | 0.89 | 0.23 | 0.38 | 0.02 | 0.01 | 0.00  | 92.98 |
| 2AB-06  | Enamel  | 435                           | 38.81 | 0.00 | 0.46 | 51.10 | 0.15 | 0.17 | 0.02 | 0.82 | 0.36 | 0.33 | 0.02 | 0.02 | 0.03  | 92.26 |
| 2AB-07  | Enamel  | 522                           | 39.06 | 0.06 | 0.44 | 50.65 | 0.23 | 0.27 | 0.05 | 0.75 | 0.27 | 0.33 | 0.04 | 0.04 | 0.01  | 92.20 |
| 2AB-08  | Enamel  | 609                           | 39.01 | 0.02 | 0.54 | 51.30 | 0.19 | 0.22 | 0.05 | 0.81 | 0.49 | 0.29 | 0.02 | 0.01 | 0.02  | 92.97 |
| 2AB-09  | Enamel  | 696                           | 39.27 | 0.00 | 0.45 | 51.13 | 0.17 | 0.18 | 0.06 | 0.88 | 0.44 | 0.28 | 0.01 | 0.00 | 0.00  | 92.88 |
| 2AB-10  | Enamel  | 783                           | 39.19 | 0.00 | 0.50 | 50.72 | 0.20 | 0.21 | 0.05 | 0.90 | 0.37 | 0.27 | 0.01 | 0.03 | 0.01  | 92.46 |
| 2AB-11  | Enamel  | 870                           | 38.44 | 0.00 | 0.47 | 50.39 | 0.19 | 0.19 | 0.08 | 1.02 | 0.34 | 0.24 | 0.06 | 0.00 | 0.01  | 91.42 |
| 2AB-12  | Enamel  | 957                           | 38.89 | 0.01 | 0.58 | 50.16 | 0.19 | 0.26 | 0.10 | 1.11 | 0.30 | 0.23 | 0.04 | 0.01 | 0.00  | 91.87 |
| 2AB-13  | Enamel  | 1044                          | 38.06 | 0.01 | 0.72 | 49.87 | 0.22 | 0.27 | 0.07 | 1.04 | 0.26 | 0.19 | 0.01 | 0.03 | 0.00  | 90.75 |
| 2AB-14  | Enamel  | 1131                          | 38.27 | 0.00 | 0.76 | 49.29 | 0.17 | 0.33 | 0.09 | 1.15 | 0.32 | 0.17 | 0.05 | 0.01 | 0.00  | 90.60 |
| 2AB-15  | Dentin  | 1218                          | 37.03 | 0.14 | 1.48 | 48.80 | 0.18 | 0.65 | 0.10 | 0.86 | 1.15 | 0.05 | 0.06 | 0.02 | 0.00  | 90.52 |
| 2AB-16  | Dentin  | 1305                          | 36.49 | 0.39 | 1.79 | 49.22 | 0.13 | 1.05 | 0.18 | 0.48 | 2.13 | 0.03 | 0.08 | 0.00 | 0.07  | 92.04 |
| 2AB-17  | Dentin  | 1392                          | 36.49 | 0.38 | 1.77 | 49.40 | 0.17 | 0.97 | 0.18 | 0.43 | 2.02 | 0.01 | 0.10 | 0.00 | 0.02  | 91.92 |
| 2AB-18  | Dentin  | 1479                          | 36.16 | 0.56 | 1.97 | 49.08 | 0.11 | 1.12 | 0.21 | 0.44 | 2.17 | 0.01 | 0.07 | 0.00 | 0.05  | 91.95 |
| 2AB-19  | Dentin  | 1566                          | 37.59 | 0.34 | 2.29 | 48.80 | 0.10 | 1.14 | 0.21 | 0.42 | 2.23 | 0.01 | 0.07 | 0.01 | 0.02  | 93.24 |
| 2AB-20  | Dentin  | 1653                          | 35.97 | 0.14 | 2.52 | 48.00 | 0.06 | 1.32 | 0.15 | 0.49 | 2.17 | 0.01 | 0.04 | 0.00 | 0.01  | 90.87 |

Cat# 021-06 *Hippopotamus sp*

Molar fragment Lake Albert, Nkondo Fm.

Surface Find

E30.8988124

N1.41939191

| Profile | Mineral | Distance (µm) | P2O5  | SiO2 | FeO  | CaO   | MgO  | MnO  | SrO  | Na2O | F    | Cl   | SO3  | K2O  | Al2O3 | Total |
|---------|---------|---------------|-------|------|------|-------|------|------|------|------|------|------|------|------|-------|-------|
| 3AB-01  | Enamel  | 45            | 38.62 | 0.01 | 0.67 | 50.39 | 0.13 | 0.12 | 0.05 | 0.59 | 0.26 | 0.56 | 0.02 | 0.00 | 0.04  | 91.45 |
| 3AB-02  | Enamel  | 94            | 38.57 | 0.00 | 0.56 | 50.76 | 0.21 | 0.19 | 0.09 | 0.59 | 0.22 | 0.52 | 0.05 | 0.03 | 0.01  | 91.80 |
| 3AB-03  | Enamel  | 188           | 38.68 | 0.00 | 0.62 | 50.78 | 0.18 | 0.19 | 0.05 | 0.68 | 0.23 | 0.46 | 0.07 | 0.01 | 0.04  | 91.98 |
| 3AB-04  | Enamel  | 282           | 37.77 | 0.00 | 0.58 | 50.80 | 0.21 | 0.16 | 0.06 | 0.72 | 0.15 | 0.42 | 0.04 | 0.02 | 0.12  | 91.05 |
| 3AB-05  | Enamel  | 376           | 38.08 | 0.02 | 0.58 | 50.55 | 0.19 | 0.15 | 0.08 | 0.73 | 0.27 | 0.38 | 0.02 | 0.03 | 0.05  | 91.12 |
| 3AB-06  | Enamel  | 470           | 37.73 | 0.00 | 0.61 | 50.42 | 0.18 | 0.11 | 0.04 | 0.83 | 0.25 | 0.36 | 0.02 | 0.03 | 0.00  | 90.59 |
| 3AB-07  | Enamel  | 564           | 37.64 | 0.00 | 0.56 | 50.44 | 0.21 | 0.21 | 0.09 | 0.74 | 0.29 | 0.34 | 0.02 | 0.03 | 0.04  | 90.61 |
| 3AB-08  | Enamel  | 658           | 38.10 | 0.00 | 0.63 | 49.92 | 0.16 | 0.12 | 0.07 | 0.82 | 0.24 | 0.33 | 0.04 | 0.01 | 0.10  | 90.55 |
| 3AB-09  | Enamel  | 752           | 37.85 | 0.02 | 0.60 | 49.91 | 0.21 | 0.17 | 0.06 | 0.75 | 0.29 | 0.30 | 0.03 | 0.02 | 0.03  | 90.24 |
| 3AB-10  | Enamel  | 846           | 38.24 | 0.02 | 0.59 | 49.44 | 0.19 | 0.18 | 0.06 | 0.83 | 0.33 | 0.28 | 0.04 | 0.02 | 0.01  | 90.21 |
| 3AB-11  | Enamel  | 940           | 38.17 | 0.04 | 0.69 | 49.68 | 0.18 | 0.19 | 0.07 | 0.92 | 0.21 | 0.27 | 0.03 | 0.03 | 0.07  | 90.53 |
| 3AB-12  | Enamel  | 1034          | 38.09 | 0.02 | 0.66 | 49.44 | 0.25 | 0.25 | 0.08 | 0.82 | 0.25 | 0.25 | 0.07 | 0.01 | 0.06  | 90.25 |
| 3AB-13  | Enamel  | 1128          | 37.86 | 0.01 | 0.70 | 49.07 | 0.23 | 0.31 | 0.09 | 1.03 | 0.27 | 0.22 | 0.03 | 0.02 | 0.05  | 89.89 |
| 3AB-14  | Enamel  | 1222          | 37.95 | 0.04 | 0.69 | 49.46 | 0.21 | 0.30 | 0.05 | 1.03 | 0.26 | 0.20 | 0.04 | 0.03 | 0.00  | 90.27 |
| 3AB-15  | Enamel  | 1316          | 37.70 | 0.03 | 0.77 | 48.63 | 0.25 | 0.30 | 0.09 | 0.99 | 0.26 | 0.19 | 0.02 | 0.03 | 0.01  | 89.26 |
| 3AB-16  | Enamel  | 1410          | 37.29 | 0.01 | 0.80 | 49.43 | 0.19 | 0.40 | 0.06 | 1.00 | 0.28 | 0.17 | 0.03 | 0.02 | 0.03  | 89.70 |
| 3AB-17  | Enamel  | 1504          | 37.82 | 0.03 | 0.84 | 48.94 | 0.19 | 0.45 | 0.08 | 1.15 | 0.30 | 0.15 | 0.01 | 0.03 | 0.02  | 90.01 |
| 3AB-18  | Enamel  | 1598          | 36.94 | 0.06 | 0.94 | 48.85 | 0.24 | 0.33 | 0.07 | 1.07 | 0.25 | 0.16 | 0.01 | 0.01 | 0.03  | 88.95 |
| 3AB-19  | Dentin  | 1692          | 36.51 | 0.17 | 2.12 | 48.86 | 0.14 | 1.17 | 0.16 | 0.44 | 2.05 | 0.02 | 0.05 | 0.02 | 0.04  | 91.73 |
| 3AB-20  | Dentin  | 1786          | 36.18 | 0.12 | 2.24 | 48.45 | 0.10 | 1.19 | 0.17 | 0.43 | 2.06 | 0.01 | 0.04 | 0.00 | 0.03  | 91.02 |

Cat# 021-06 *Hippopotamus sp*

Molar fragment Lake Albert, Nkondo Fm.

Surface Find

E30.8988124

N1.41939191

| Profile | Mineral | Distance<br>( $\mu\text{m}$ ) | P2O5  | SiO2 | FeO  | CaO   | MgO  | MnO  | SrO  | Na2O | F    | Cl   | SO3  | K2O  | Al2O3 | Total |
|---------|---------|-------------------------------|-------|------|------|-------|------|------|------|------|------|------|------|------|-------|-------|
| 6AB-01  | Enamel  | 50                            | 38.26 | 0.09 | 0.90 | 47.47 | 0.17 | 0.23 | 0.08 | 0.86 | 0.50 | 0.35 | 0.09 | 0.06 | 0.47  | 89.52 |
| 6AB-02  | Enamel  | 128                           | 39.24 | 0.01 | 0.57 | 49.50 | 0.18 | 0.16 | 0.04 | 0.98 | 0.31 | 0.26 | 0.07 | 0.03 | 0.15  | 91.49 |
| 6AB-03  | Enamel  | 256                           | 37.77 | 0.05 | 2.70 | 47.56 | 0.16 | 0.69 | 0.10 | 0.57 | 2.14 | 0.05 | 0.11 | 0.04 | 0.61  | 92.54 |
| 6AB-04  | Enamel  | 384                           | 30.62 | 0.01 | 1.35 | 37.66 | 0.09 | 0.63 | 0.12 | 0.35 | 2.16 | 0.06 | 0.07 | 0.04 | 0.64  | 73.79 |
| 6AB-05  | Enamel  | 512                           | 36.93 | 0.08 | 5.17 | 45.99 | 0.13 | 0.89 | 0.15 | 0.34 | 2.40 | 0.01 | 0.21 | 0.04 | 0.57  | 92.91 |
| 6AB-06  | Enamel  | 640                           | 38.05 | 0.00 | 2.98 | 47.74 | 0.09 | 0.81 | 0.15 | 0.48 | 2.47 | 0.01 | 0.19 | 0.05 | 0.40  | 93.41 |
| 6AB-07  | Enamel  | 768                           | 37.59 | 0.02 | 3.33 | 47.90 | 0.11 | 0.90 | 0.12 | 0.39 | 2.39 | 0.01 | 0.23 | 0.03 | 0.33  | 93.35 |
| 6AB-08  | Enamel  | 896                           | 38.84 | 0.00 | 3.19 | 48.34 | 0.08 | 0.82 | 0.15 | 0.39 | 2.52 | 0.00 | 0.17 | 0.03 | 0.28  | 94.81 |
| 6AB-09  | Enamel  | 1024                          | 35.90 | 0.06 | 3.44 | 44.82 | 0.11 | 0.87 | 0.14 | 0.36 | 2.37 | 0.02 | 0.09 | 0.02 | 0.17  | 88.36 |
| 6AB-10  | Enamel  | 1152                          | 37.70 | 0.03 | 3.59 | 47.73 | 0.09 | 0.96 | 0.17 | 0.39 | 2.50 | 0.00 | 0.17 | 0.03 | 0.11  | 93.47 |
| 6AB-11  | Enamel  | 1280                          | 37.82 | 0.01 | 2.94 | 48.75 | 0.08 | 1.03 | 0.12 | 0.39 | 2.47 | 0.01 | 0.20 | 0.00 | 0.05  | 93.88 |
| 6AB-12  | Enamel  | 1408                          | 37.69 | 0.04 | 2.62 | 48.43 | 0.10 | 1.05 | 0.13 | 0.36 | 2.46 | 0.00 | 0.16 | 0.02 | 0.01  | 93.06 |
| 6AB-13  | Enamel  | 1536                          | 38.07 | 0.00 | 3.06 | 48.85 | 0.11 | 1.00 | 0.13 | 0.37 | 2.66 | 0.01 | 0.17 | 0.02 | 0.04  | 94.50 |
| 6AB-14  | Enamel  | 1664                          | 38.32 | 0.03 | 2.55 | 48.98 | 0.09 | 0.98 | 0.14 | 0.35 | 2.57 | 0.01 | 0.13 | 0.02 | 0.00  | 94.17 |
| 6AB-15  | Enamel  | 1792                          | 38.24 | 0.02 | 2.46 | 49.31 | 0.11 | 0.98 | 0.15 | 0.33 | 2.61 | 0.01 | 0.18 | 0.04 | 0.02  | 94.45 |
| 6AB-16  | Enamel  | 1920                          | 37.67 | 0.05 | 2.53 | 48.66 | 0.14 | 0.88 | 0.13 | 0.32 | 2.57 | 0.01 | 0.18 | 0.02 | 0.06  | 93.21 |
| 6AB-17  | Enamel  | 2048                          | 38.28 | 0.02 | 2.22 | 49.52 | 0.06 | 0.87 | 0.10 | 0.26 | 2.56 | 0.00 | 0.23 | 0.01 | 0.01  | 94.14 |
| 6AB-18  | Enamel  | 2176                          | 37.31 | 0.01 | 2.16 | 48.98 | 0.08 | 1.03 | 0.10 | 0.29 | 2.55 | 0.01 | 0.25 | 0.00 | 0.02  | 92.78 |
| 6AB-19  | Enamel  | 2304                          | 37.91 | 0.02 | 1.83 | 49.99 | 0.06 | 0.97 | 0.09 | 0.25 | 2.63 | 0.00 | 0.28 | 0.02 | 0.00  | 94.07 |
| 6AB-20  | Enamel  | 2432                          | 37.95 | 0.06 | 2.42 | 49.43 | 0.12 | 0.92 | 0.15 | 0.37 | 2.54 | 0.00 | 0.43 | 0.00 | 0.12  | 94.50 |
| 6AB-21  | Enamel  | 2560                          | 36.03 | 0.06 | 4.98 | 47.43 | 0.12 | 0.95 | 0.12 | 0.25 | 2.28 | 0.01 | 0.31 | 0.00 | 0.00  | 92.54 |
| 6AB-22  | Enamel  | 2688                          | 36.13 | 0.36 | 4.98 | 46.83 | 0.19 | 0.88 | 0.14 | 0.22 | 2.40 | 0.00 | 0.25 | 0.02 | 0.03  | 92.44 |
| 6AB-23  | Enamel  | 2816                          | 35.55 | 0.36 | 7.37 | 45.74 | 0.13 | 0.97 | 0.15 | 0.22 | 2.23 | 0.01 | 0.26 | 0.02 | 0.00  | 93.01 |
| 6AB-24  | Enamel  | 2944                          | 34.24 | 0.62 | 9.31 | 43.18 | 0.17 | 0.90 | 0.12 | 0.21 | 1.95 | 0.00 | 0.20 | 0.01 | 0.02  | 90.94 |
| 6AB-25  | Enamel  | 3072                          | 33.90 | 0.34 | 9.04 | 43.33 | 0.12 | 2.71 | 0.13 | 0.25 | 2.10 | 0.01 | 0.20 | 0.00 | 0.05  | 92.16 |
| 6AB-26  | Enamel  | 3200                          | 35.85 | 0.45 | 8.20 | 45.02 | 0.17 | 0.82 | 0.10 | 0.21 | 2.14 | 0.01 | 0.20 | 0.01 | 0.00  | 93.19 |
| 6AB-27  | Enamel  | 3328                          | 35.71 | 0.62 | 7.13 | 45.53 | 0.16 | 0.75 | 0.16 | 0.24 | 2.21 | 0.01 | 0.18 | 0.02 | 0.01  | 92.74 |
| 6AB-28  | Enamel  | 3456                          | 35.29 | 0.57 | 7.72 | 45.29 | 0.20 | 0.81 | 0.11 | 0.26 | 2.26 | 0.00 | 0.19 | 0.01 | 0.00  | 92.71 |
| 6AB-29  | Enamel  | 3584                          | 37.42 | 0.23 | 4.72 | 48.09 | 0.19 | 0.91 | 0.13 | 0.21 | 2.48 | 0.01 | 0.19 | 0.00 | 0.03  | 94.60 |
| 6AB-30  | Enamel  | 3712                          | 35.90 | 0.53 | 7.91 | 45.03 | 0.17 | 0.92 | 0.14 | 0.24 | 2.18 | 0.01 | 0.18 | 0.00 | 0.01  | 93.21 |

Cat# 019-06 *Hippopotamus sp*

Molar fragment

Lake Albert, Nkondo Fm.

Surface Find

E30.882052

N1.406682895

| Profile | Mineral | Distance<br>( $\mu\text{m}$ ) | Distance |      |      |       |      |      |      |      |      |      |      |      |       | Total |
|---------|---------|-------------------------------|----------|------|------|-------|------|------|------|------|------|------|------|------|-------|-------|
|         |         |                               | P2O5     | SiO2 | FeO  | CaO   | MgO  | MnO  | SrO  | Na2O | F    | Cl   | SO3  | K2O  | Al2O3 |       |
| 1AB-01  | Enamel  | 50                            | 37.21    | 0.28 | 2.33 | 49.99 | 0.11 | 0.29 | 0.10 | 0.47 | 0.73 | 0.49 | 0.13 | 0.02 | 0.03  | 92.19 |
| 1AB-02  | Enamel  | 131                           | 37.78    | 0.11 | 0.59 | 51.54 | 0.09 | 0.13 | 0.07 | 0.67 | 0.24 | 0.52 | 0.11 | 0.00 | 0.00  | 91.86 |
| 1AB-03  | Enamel  | 262                           | 39.07    | 0.00 | 0.52 | 51.00 | 0.15 | 0.09 | 0.07 | 0.70 | 0.21 | 0.49 | 0.05 | 0.01 | 0.01  | 92.36 |
| 1AB-04  | Enamel  | 393                           | 37.87    | 0.00 | 0.46 | 51.27 | 0.14 | 0.18 | 0.07 | 0.73 | 0.23 | 0.48 | 0.04 | 0.02 | 0.00  | 91.49 |
| 1AB-05  | Enamel  | 524                           | 39.00    | 0.03 | 0.47 | 51.00 | 0.20 | 0.13 | 0.00 | 0.74 | 0.16 | 0.45 | 0.03 | 0.01 | 0.02  | 92.23 |
| 1AB-06  | Enamel  | 655                           | 38.04    | 0.02 | 0.59 | 51.10 | 0.23 | 0.12 | 0.07 | 0.77 | 0.18 | 0.43 | 0.03 | 0.00 | 0.00  | 91.59 |
| 1AB-07  | Enamel  | 786                           | 38.97    | 0.02 | 0.41 | 51.14 | 0.19 | 0.16 | 0.06 | 0.78 | 0.22 | 0.42 | 0.03 | 0.00 | 0.00  | 92.39 |
| 1AB-08  | Enamel  | 917                           | 38.24    | 0.00 | 0.40 | 50.88 | 0.16 | 0.21 | 0.08 | 0.77 | 0.24 | 0.40 | 0.02 | 0.04 | 0.00  | 91.44 |
| 1AB-09  | Enamel  | 1048                          | 37.87    | 0.02 | 0.45 | 51.00 | 0.19 | 0.13 | 0.04 | 0.84 | 0.25 | 0.41 | 0.01 | 0.00 | 0.00  | 91.20 |
| 1AB-10  | Enamel  | 1179                          | 38.02    | 0.04 | 0.51 | 51.36 | 0.16 | 0.11 | 0.07 | 0.85 | 0.10 | 0.40 | 0.02 | 0.00 | 0.01  | 91.66 |
| 1AB-11  | Enamel  | 1310                          | 37.84    | 0.02 | 0.50 | 51.01 | 0.15 | 0.20 | 0.06 | 0.87 | 0.14 | 0.37 | 0.01 | 0.02 | 0.00  | 91.19 |
| 1AB-12  | Enamel  | 1441                          | 37.39    | 0.04 | 0.55 | 50.82 | 0.14 | 0.10 | 0.03 | 0.99 | 0.20 | 0.36 | 0.03 | 0.03 | 0.00  | 90.67 |
| 1AB-13  | Enamel  | 1572                          | 38.32    | 0.08 | 0.58 | 50.51 | 0.16 | 0.17 | 0.05 | 0.83 | 0.18 | 0.34 | 0.01 | 0.02 | 0.00  | 91.23 |
| 1AB-14  | Enamel  | 1703                          | 37.97    | 0.03 | 0.47 | 50.94 | 0.15 | 0.14 | 0.03 | 0.85 | 0.27 | 0.35 | 0.02 | 0.02 | 0.02  | 91.25 |
| 1AB-15  | Enamel  | 1834                          | 38.66    | 0.11 | 0.66 | 50.65 | 0.13 | 0.17 | 0.05 | 0.77 | 0.24 | 0.39 | 0.08 | 0.03 | 0.02  | 91.95 |
| 1AB-16  | Enamel  | 1965                          | 37.32    | 0.09 | 0.59 | 50.86 | 0.17 | 0.11 | 0.01 | 0.86 | 0.20 | 0.38 | 0.07 | 0.00 | 0.00  | 90.65 |
| 1AB-17  | Enamel  | 2096                          | 38.05    | 0.05 | 0.45 | 51.00 | 0.14 | 0.16 | 0.04 | 0.81 | 0.20 | 0.40 | 0.07 | 0.02 | 0.01  | 91.39 |
| 1AB-18  | Enamel  | 2227                          | 37.91    | 0.04 | 0.45 | 51.51 | 0.17 | 0.10 | 0.06 | 0.74 | 0.23 | 0.43 | 0.02 | 0.00 | 0.02  | 91.66 |
| 1AB-19  | Enamel  | 2358                          | 37.75    | 0.02 | 0.37 | 51.34 | 0.15 | 0.13 | 0.06 | 0.71 | 0.18 | 0.45 | 0.00 | 0.00 | 0.04  | 91.20 |
| 1AB-20  | Enamel  | 2489                          | 38.85    | 0.02 | 0.47 | 51.01 | 0.16 | 0.14 | 0.04 | 0.80 | 0.21 | 0.48 | 0.03 | 0.02 | 0.02  | 92.24 |
| 1AB-21  | Enamel  | 2620                          | 38.33    | 0.09 | 0.46 | 50.99 | 0.15 | 0.12 | 0.02 | 0.84 | 0.29 | 0.59 | 0.11 | 0.06 | 0.00  | 92.04 |
| 1AB-22  | Enamel  | 2751                          | 38.81    | 0.04 | 0.46 | 50.97 | 0.16 | 0.08 | 0.01 | 0.70 | 0.36 | 0.50 | 0.06 | 0.01 | 0.02  | 92.18 |
| 1AB-23  | Enamel  | 2882                          | 38.30    | 0.00 | 0.48 | 51.19 | 0.20 | 0.15 | 0.03 | 0.66 | 0.31 | 0.50 | 0.05 | 0.01 | 0.00  | 91.88 |
| 1AB-24  | Enamel  | 3013                          | 39.52    | 0.02 | 0.55 | 51.19 | 0.17 | 0.17 | 0.01 | 0.72 | 0.25 | 0.49 | 0.03 | 0.04 | 0.02  | 93.17 |
| 1AB-25  | Enamel  | 3144                          | 39.19    | 0.04 | 0.46 | 51.20 | 0.16 | 0.09 | 0.04 | 0.71 | 0.32 | 0.48 | 0.02 | 0.02 | 0.02  | 92.73 |
| 1AB-26  | Enamel  | 3275                          | 38.23    | 0.03 | 0.41 | 51.20 | 0.14 | 0.14 | 0.01 | 0.81 | 0.18 | 0.45 | 0.03 | 0.02 | 0.03  | 91.66 |
| 1AB-27  | Enamel  | 3406                          | 39.01    | 0.02 | 0.41 | 50.99 | 0.17 | 0.13 | 0.03 | 0.89 | 0.22 | 0.44 | 0.03 | 0.05 | 0.02  | 92.41 |
| 1AB-28  | Enamel  | 3537                          | 38.73    | 0.01 | 0.38 | 51.00 | 0.17 | 0.08 | 0.03 | 0.86 | 0.21 | 0.37 | 0.03 | 0.01 | 0.00  | 91.87 |
| 1AB-29  | Enamel  | 3668                          | 38.49    | 0.00 | 0.38 | 50.91 | 0.14 | 0.07 | 0.05 | 0.87 | 0.20 | 0.33 | 0.05 | 0.01 | 0.00  | 91.50 |
| 1AB-30  | Enamel  | 3799                          | 38.47    | 0.00 | 0.39 | 50.31 | 0.18 | 0.18 | 0.03 | 0.98 | 0.24 | 0.27 | 0.06 | 0.02 | 0.02  | 91.15 |

Cat# 019-06 *Hippopotamus sp*

Molar fragment

Lake Albert, Nkondo Fm.

Surface Find

E30.882052

N1.406682895

| Profile | Mineral | Distance<br>( $\mu\text{m}$ ) | P2O5  | SiO2 | FeO  | CaO   | MgO  | MnO  | SrO  | Na2O | F    | Cl   | SO3  | K2O  | Al2O3 | Total |
|---------|---------|-------------------------------|-------|------|------|-------|------|------|------|------|------|------|------|------|-------|-------|
| 1AB-31  | Enamel  | 3930                          | 37.55 | 0.04 | 0.51 | 50.34 | 0.17 | 0.19 | 0.05 | 1.03 | 0.21 | 0.22 | 0.02 | 0.00 | 0.00  | 90.33 |
| 1AB-32  | Enamel  | 4061                          | 37.73 | 0.03 | 0.50 | 50.70 | 0.20 | 0.07 | 0.03 | 1.01 | 0.23 | 0.26 | 0.01 | 0.02 | 0.00  | 90.81 |
| 1AB-33  | Enamel  | 4192                          | 37.89 | 0.00 | 0.40 | 50.36 | 0.19 | 0.00 | 0.01 | 0.89 | 0.31 | 0.20 | 0.04 | 0.01 | 0.02  | 90.33 |
| 1AB-34  | Enamel  | 4323                          | 38.25 | 0.03 | 0.59 | 50.12 | 0.20 | 0.06 | 0.09 | 1.05 | 0.34 | 0.17 | 0.06 | 0.04 | 0.01  | 91.00 |
| 1AB-35  | Enamel  | 4454                          | 37.84 | 0.01 | 0.48 | 49.71 | 0.21 | 0.14 | 0.03 | 1.03 | 0.44 | 0.13 | 0.03 | 0.03 | 0.02  | 90.10 |
| 1AB-36  | Enamel  | 4585                          | 37.51 | 0.00 | 0.52 | 49.88 | 0.26 | 0.05 | 0.09 | 1.21 | 0.59 | 0.08 | 0.01 | 0.04 | 0.00  | 90.23 |
| 1AB-37  | Dentin  | 4716                          | 36.34 | 0.42 | 1.55 | 49.21 | 0.19 | 0.74 | 0.23 | 0.39 | 2.34 | 0.02 | 0.10 | 0.00 | 0.04  | 91.57 |
| 1AB-38  | Dentin  | 4847                          | 35.53 | 0.78 | 2.20 | 48.21 | 0.25 | 0.75 | 0.25 | 0.41 | 2.16 | 0.03 | 0.08 | 0.01 | 0.01  | 90.65 |
| 1AB-39  | Dentin  | 4978                          | 35.98 | 0.48 | 2.01 | 48.88 | 0.19 | 0.63 | 0.27 | 0.41 | 2.32 | 0.02 | 0.05 | 0.00 | 0.00  | 91.23 |
| 1AB-40  | Dentin  | 5109                          | 35.22 | 0.34 | 1.73 | 49.54 | 0.19 | 0.57 | 0.28 | 0.43 | 2.19 | 0.02 | 0.05 | 0.02 | 0.01  | 90.58 |

Cat# 019-06 *Hippopotamus sp*

Molar fragment

Lake Albert, Nkondo Fm.

Surface Find

E30.882052

N1.406682895

| Profile | Mineral | Distance<br>( $\mu\text{m}$ ) |       |      |      |       |      |      |      |      |      |      |      |      |       | Total |
|---------|---------|-------------------------------|-------|------|------|-------|------|------|------|------|------|------|------|------|-------|-------|
|         |         |                               | P2O5  | SiO2 | FeO  | CaO   | MgO  | MnO  | SrO  | Na2O | F    | Cl   | SO3  | K2O  | Al2O3 |       |
| 2AB-01  | Enamel  | 50                            | 38.35 | 0.30 | 1.38 | 50.33 | 0.11 | 0.16 | 0.06 | 0.49 | 0.71 | 0.58 | 0.10 | 0.01 | 0.08  | 92.65 |
| 2AB-02  | Enamel  | 137                           | 39.00 | 0.24 | 0.50 | 51.30 | 0.16 | 0.10 | 0.06 | 0.67 | 0.25 | 0.58 | 0.18 | 0.02 | 0.00  | 93.06 |
| 2AB-03  | Enamel  | 274                           | 39.23 | 0.01 | 0.35 | 51.60 | 0.16 | 0.01 | 0.03 | 0.69 | 0.20 | 0.54 | 0.03 | 0.01 | 0.02  | 92.88 |
| 2AB-04  | Enamel  | 411                           | 39.34 | 0.00 | 0.21 | 51.51 | 0.18 | 0.12 | 0.02 | 0.83 | 0.16 | 0.50 | 0.03 | 0.02 | 0.00  | 92.92 |
| 2AB-05  | Enamel  | 548                           | 39.09 | 0.02 | 0.30 | 51.38 | 0.16 | 0.08 | 0.07 | 0.70 | 0.24 | 0.48 | 0.03 | 0.02 | 0.01  | 92.57 |
| 2AB-06  | Enamel  | 685                           | 39.06 | 0.08 | 0.43 | 51.40 | 0.20 | 0.11 | 0.07 | 0.66 | 0.28 | 0.44 | 0.01 | 0.02 | 0.02  | 92.76 |
| 2AB-07  | Enamel  | 822                           | 39.98 | 0.07 | 0.70 | 51.00 | 0.22 | 0.09 | 0.00 | 0.79 | 0.26 | 0.43 | 0.02 | 0.02 | 0.00  | 93.59 |
| 2AB-08  | Enamel  | 959                           | 38.74 | 0.02 | 0.55 | 50.70 | 0.21 | 0.07 | 0.07 | 0.91 | 0.28 | 0.39 | 0.00 | 0.00 | 0.04  | 91.97 |
| 2AB-09  | Enamel  | 1096                          | 39.02 | 0.02 | 0.63 | 50.63 | 0.15 | 0.12 | 0.00 | 0.90 | 0.28 | 0.38 | 0.00 | 0.00 | 0.00  | 92.13 |
| 2AB-10  | Enamel  | 1233                          | 38.43 | 0.08 | 0.50 | 50.92 | 0.19 | 0.15 | 0.04 | 0.91 | 0.28 | 0.35 | 0.02 | 0.02 | 0.00  | 91.89 |
| 2AB-11  | Enamel  | 1370                          | 38.83 | 0.00 | 0.57 | 50.47 | 0.20 | 0.20 | 0.01 | 1.00 | 0.22 | 0.32 | 0.02 | 0.01 | 0.00  | 91.85 |
| 2AB-12  | Enamel  | 1507                          | 38.51 | 0.00 | 0.62 | 50.22 | 0.21 | 0.14 | 0.07 | 0.99 | 0.27 | 0.31 | 0.00 | 0.02 | 0.00  | 91.36 |
| 2AB-13  | Enamel  | 1644                          | 38.41 | 0.01 | 0.57 | 50.25 | 0.20 | 0.11 | 0.04 | 0.99 | 0.21 | 0.29 | 0.01 | 0.07 | 0.00  | 91.15 |
| 2AB-14  | Enamel  | 1781                          | 38.46 | 0.00 | 0.38 | 50.11 | 0.22 | 0.16 | 0.07 | 1.11 | 0.28 | 0.26 | 0.02 | 0.01 | 0.02  | 91.08 |
| 2AB-15  | Enamel  | 1918                          | 38.13 | 0.00 | 0.36 | 50.11 | 0.25 | 0.13 | 0.05 | 1.03 | 0.35 | 0.21 | 0.02 | 0.03 | 0.00  | 90.67 |
| 2AB-16  | Enamel  | 2055                          | 38.42 | 0.00 | 0.57 | 49.60 | 0.29 | 0.15 | 0.07 | 1.13 | 0.31 | 0.17 | 0.03 | 0.02 | 0.00  | 90.75 |
| 2AB-17  | Dentin  | 2192                          | 35.59 | 0.43 | 1.59 | 49.93 | 0.18 | 0.61 | 0.24 | 0.36 | 2.54 | 0.03 | 0.10 | 0.03 | 0.01  | 91.63 |
| 2AB-18  | Dentin  | 2329                          | 35.15 | 0.62 | 1.87 | 49.18 | 0.21 | 0.57 | 0.22 | 0.43 | 2.43 | 0.01 | 0.13 | 0.00 | 0.04  | 90.87 |
| 2AB-19  | Dentin  | 2466                          | 35.36 | 0.44 | 1.71 | 49.71 | 0.23 | 0.53 | 0.23 | 0.33 | 2.47 | 0.01 | 0.09 | 0.00 | 0.01  | 91.12 |
| 2AB-20  | Dentin  | 2603                          | 35.15 | 0.43 | 1.78 | 49.36 | 0.14 | 0.91 | 0.19 | 0.35 | 2.46 | 0.01 | 0.08 | 0.00 | 0.04  | 90.89 |

| Cat# 050-06 <i>Hippopotamus sp</i> |         |               | Molar fragment |      |      |       |      |      |      | Lake Albert, Nkondo Fm. |      | Surface Find |      | E30.90277269 |       | N1.42103198 |  |
|------------------------------------|---------|---------------|----------------|------|------|-------|------|------|------|-------------------------|------|--------------|------|--------------|-------|-------------|--|
| Profile                            | Mineral | Distance (µm) | P2O5           | SiO2 | FeO  | CaO   | MgO  | MnO  | SrO  | Na2O                    | F    | Cl           | SO3  | K2O          | Al2O3 | Total       |  |
| 1AB-01                             | Enamel  | 50            | 39.31          | 0.02 | 0.66 | 50.55 | 0.20 | 0.08 | 0.02 | 0.71                    | 0.25 | 0.47         | 0.26 | 0.04         | 0.00  | 92.58       |  |
| 1AB-02                             | Enamel  | 131           | 39.48          | 0.04 | 0.54 | 51.11 | 0.19 | 0.21 | 0.06 | 0.68                    | 0.18 | 0.50         | 0.04 | 0.01         | 0.01  | 93.04       |  |
| 1AB-03                             | Enamel  | 262           | 39.69          | 0.02 | 0.61 | 50.88 | 0.14 | 0.16 | 0.07 | 0.64                    | 0.20 | 0.48         | 0.03 | 0.00         | 0.01  | 92.93       |  |
| 1AB-04                             | Enamel  | 393           | 39.50          | 0.04 | 0.54 | 50.87 | 0.17 | 0.17 | 0.07 | 0.75                    | 0.22 | 0.46         | 0.00 | 0.00         | 0.02  | 92.80       |  |
| 1AB-05                             | Enamel  | 524           | 39.49          | 0.00 | 0.54 | 51.23 | 0.16 | 0.19 | 0.07 | 0.73                    | 0.18 | 0.44         | 0.00 | 0.00         | 0.00  | 93.03       |  |
| 1AB-06                             | Enamel  | 655           | 40.01          | 0.02 | 0.70 | 51.02 | 0.20 | 0.20 | 0.07 | 0.77                    | 0.23 | 0.39         | 0.03 | 0.03         | 0.00  | 93.65       |  |
| 1AB-07                             | Enamel  | 786           | 39.27          | 0.02 | 0.52 | 51.09 | 0.16 | 0.17 | 0.05 | 0.76                    | 0.26 | 0.36         | 0.00 | 0.02         | 0.02  | 92.69       |  |
| 1AB-08                             | Enamel  | 917           | 39.61          | 0.03 | 0.65 | 51.02 | 0.20 | 0.12 | 0.07 | 0.74                    | 0.24 | 0.35         | 0.02 | 0.05         | 0.00  | 93.09       |  |
| 1AB-09                             | Enamel  | 1048          | 38.56          | 0.00 | 0.68 | 50.89 | 0.16 | 0.12 | 0.07 | 0.76                    | 0.22 | 0.32         | 0.01 | 0.00         | 0.01  | 91.80       |  |
| 1AB-10                             | Enamel  | 1179          | 39.14          | 0.03 | 0.68 | 50.46 | 0.17 | 0.12 | 0.05 | 0.87                    | 0.28 | 0.29         | 0.02 | 0.03         | 0.00  | 92.13       |  |
| 1AB-11                             | Enamel  | 1310          | 39.28          | 0.03 | 0.67 | 50.36 | 0.18 | 0.22 | 0.06 | 0.89                    | 0.29 | 0.25         | 0.02 | 0.03         | 0.00  | 92.26       |  |
| 1AB-12                             | Enamel  | 1441          | 38.22          | 0.00 | 0.72 | 50.28 | 0.20 | 0.19 | 0.07 | 1.01                    | 0.25 | 0.24         | 0.03 | 0.02         | 0.01  | 91.23       |  |
| 1AB-13                             | Enamel  | 1572          | 38.06          | 0.02 | 0.69 | 50.11 | 0.22 | 0.13 | 0.04 | 0.99                    | 0.24 | 0.21         | 0.00 | 0.01         | 0.00  | 90.71       |  |
| 1AB-14                             | Enamel  | 1703          | 38.14          | 0.00 | 0.70 | 49.80 | 0.19 | 0.24 | 0.07 | 0.97                    | 0.34 | 0.19         | 0.00 | 0.04         | 0.00  | 90.67       |  |
| 1AB-15                             | Enamel  | 1834          | 38.13          | 0.00 | 0.90 | 49.30 | 0.22 | 0.26 | 0.11 | 1.04                    | 0.45 | 0.13         | 0.00 | 0.03         | 0.00  | 90.57       |  |
| 1AB-16                             | Enamel  | 1965          | 37.96          | 0.00 | 0.85 | 49.06 | 0.26 | 0.27 | 0.07 | 1.09                    | 0.48 | 0.11         | 0.01 | 0.06         | 0.00  | 90.21       |  |
| 1AB-17                             | Dentin  | 2096          | 38.15          | 0.24 | 1.84 | 49.77 | 0.15 | 0.37 | 0.17 | 0.49                    | 2.08 | 0.03         | 0.36 | 0.01         | 0.01  | 93.67       |  |
| 1AB-18                             | Dentin  | 2227          | 37.04          | 0.39 | 2.16 | 49.31 | 0.09 | 0.54 | 0.18 | 0.46                    | 2.13 | 0.01         | 0.22 | 0.00         | 0.00  | 92.52       |  |
| 1AB-19                             | Dentin  | 2358          | 36.32          | 0.42 | 2.08 | 48.62 | 0.11 | 0.59 | 0.18 | 0.52                    | 2.16 | 0.01         | 0.32 | 0.00         | 0.02  | 91.36       |  |
| 1AB-20                             | Dentin  | 2489          | 37.38          | 0.47 | 2.10 | 49.60 | 0.08 | 0.57 | 0.14 | 0.53                    | 2.13 | 0.01         | 0.26 | 0.02         | 0.01  | 93.29       |  |

Cat# 050-06 *Hippopotamus sp*

Molar fragment

Lake Albert, Nkondo Fm.

Surface Find

E30.90277269

N1.42103198

| Profile | Mineral | Distance<br>( $\mu\text{m}$ ) | P2O5  | SiO2 | FeO  | CaO   | MgO  | MnO  | SrO  | Na2O | F    | Cl   | SO3  | K2O  | Al2O3 | Total |
|---------|---------|-------------------------------|-------|------|------|-------|------|------|------|------|------|------|------|------|-------|-------|
| 2AB-01  | Enamel  | 50                            | 40.20 | 0.03 | 0.50 | 51.16 | 0.13 | 0.18 | 0.09 | 0.75 | 0.20 | 0.51 | 0.00 | 0.04 | 0.02  | 93.80 |
| 2AB-02  | Enamel  | 131                           | 40.03 | 0.02 | 0.60 | 51.24 | 0.10 | 0.22 | 0.07 | 0.72 | 0.19 | 0.52 | 0.02 | 0.02 | 0.02  | 93.76 |
| 2AB-03  | Enamel  | 262                           | 39.62 | 0.01 | 0.53 | 51.14 | 0.16 | 0.10 | 0.06 | 0.71 | 0.18 | 0.48 | 0.06 | 0.03 | 0.00  | 93.08 |
| 2AB-04  | Enamel  | 393                           | 38.89 | 0.02 | 0.59 | 50.73 | 0.15 | 0.08 | 0.06 | 0.72 | 0.22 | 0.43 | 0.02 | 0.02 | 0.00  | 91.91 |
| 2AB-05  | Enamel  | 524                           | 39.46 | 0.01 | 0.50 | 51.46 | 0.15 | 0.16 | 0.06 | 0.82 | 0.29 | 0.42 | 0.02 | 0.02 | 0.00  | 93.37 |
| 2AB-06  | Enamel  | 655                           | 38.76 | 0.02 | 0.63 | 50.86 | 0.18 | 0.09 | 0.04 | 0.83 | 0.19 | 0.39 | 0.02 | 0.02 | 0.00  | 92.02 |
| 2AB-07  | Enamel  | 786                           | 39.36 | 0.00 | 0.57 | 50.71 | 0.19 | 0.08 | 0.08 | 0.82 | 0.20 | 0.35 | 0.02 | 0.02 | 0.00  | 92.41 |
| 2AB-08  | Enamel  | 917                           | 39.15 | 0.04 | 0.63 | 50.59 | 0.18 | 0.25 | 0.07 | 0.85 | 0.26 | 0.33 | 0.01 | 0.00 | 0.01  | 92.37 |
| 2AB-09  | Enamel  | 1048                          | 39.77 | 0.02 | 0.71 | 50.46 | 0.21 | 0.18 | 0.06 | 0.85 | 0.17 | 0.33 | 0.02 | 0.01 | 0.00  | 92.78 |
| 2AB-10  | Enamel  | 1179                          | 39.29 | 0.05 | 0.75 | 50.91 | 0.19 | 0.25 | 0.07 | 0.87 | 0.24 | 0.31 | 0.02 | 0.03 | 0.01  | 93.00 |
| 2AB-11  | Enamel  | 1310                          | 38.99 | 0.02 | 0.63 | 50.38 | 0.21 | 0.14 | 0.08 | 0.87 | 0.29 | 0.29 | 0.03 | 0.01 | 0.00  | 91.95 |
| 2AB-12  | Enamel  | 1441                          | 38.31 | 0.00 | 0.73 | 50.18 | 0.18 | 0.19 | 0.08 | 0.92 | 0.18 | 0.26 | 0.02 | 0.01 | 0.00  | 91.05 |
| 2AB-13  | Enamel  | 1572                          | 38.33 | 0.01 | 0.72 | 50.21 | 0.19 | 0.18 | 0.10 | 0.94 | 0.25 | 0.23 | 0.01 | 0.03 | 0.00  | 91.18 |
| 2AB-14  | Enamel  | 1703                          | 38.37 | 0.00 | 0.69 | 50.21 | 0.21 | 0.21 | 0.07 | 1.04 | 0.23 | 0.22 | 0.00 | 0.03 | 0.00  | 91.27 |
| 2AB-15  | Enamel  | 1834                          | 37.97 | 0.00 | 0.70 | 49.58 | 0.22 | 0.12 | 0.09 | 1.05 | 0.34 | 0.17 | 0.01 | 0.01 | 0.02  | 90.30 |
| 2AB-16  | Enamel  | 1965                          | 38.59 | 0.01 | 0.81 | 49.56 | 0.25 | 0.16 | 0.08 | 1.04 | 0.38 | 0.15 | 0.02 | 0.02 | 0.00  | 91.06 |
| 2AB-17  | Enamel  | 2096                          | 37.66 | 0.01 | 0.92 | 49.28 | 0.23 | 0.19 | 0.10 | 1.11 | 0.48 | 0.13 | 0.01 | 0.01 | 0.00  | 90.14 |
| 2AB-18  | Dentin  | 2227                          | 37.73 | 0.25 | 2.04 | 49.43 | 0.14 | 0.31 | 0.20 | 0.57 | 1.96 | 0.03 | 0.38 | 0.00 | 0.00  | 93.05 |
| 2AB-19  | Dentin  | 2358                          | 35.98 | 0.16 | 1.54 | 47.41 | 0.12 | 0.48 | 0.16 | 0.49 | 2.23 | 0.03 | 0.35 | 0.01 | 0.00  | 88.94 |
| 2AB-20  | Dentin  | 2489                          | 37.95 | 0.13 | 1.54 | 49.93 | 0.16 | 0.42 | 0.14 | 0.43 | 2.20 | 0.02 | 0.50 | 0.01 | 0.01  | 93.45 |
