# Supplementary material for: Chemical composition of modern and fossil Hippopotamid teeth and implications for paleoenvironmental reconstructions and enamel formation – Part 1: Major and minor element variation
Source: Copernicus journal article supplement (doi:10.5194/bg-9-119-2012), 2012-01-06
Supplement: Supplementary file 4 [file bg-9-119-2012-supplement.zip]

| Lake Kikorongo | <i>Hippopotamus amphibius</i> | Molar M3      | Lake Kikorongo |      |      |       |      | Surface find |      |      |      |      |      |      |       |       |
|----------------|-------------------------------|---------------|----------------|------|------|-------|------|--------------|------|------|------|------|------|------|-------|-------|
|                | Mineral                       | Distance (µm) | P2O5           | SiO2 | FeO  | CaO   | MgO  | MnO          | SrO  | Na2O | F    | Cl   | SO3  | K2O  | Al2O3 | Total |
| 1AB-01         | Enamel                        | 0             | 22.37          | 0.20 | 0.32 | 42.19 | 7.97 | 0.03         | 0.44 | 0.54 | 0.49 | 0.29 | 0.13 | 0.08 | 0.11  | 75.15 |
| 1AB-02         | Enamel                        | 173           | 35.62          | 0.32 | 0.26 | 50.28 | 0.52 | 0.10         | 0.36 | 1.08 | 0.63 | 0.42 | 0.20 | 0.08 | 0.08  | 89.93 |
| 1AB-03         | Enamel                        | 346           | 38.04          | 0.10 | 0.12 | 51.42 | 0.28 | 0.03         | 0.30 | 0.82 | 0.39 | 0.47 | 0.09 | 0.02 | 0.12  | 92.20 |
| 1AB-04         | Enamel                        | 519           | 38.41          | 0.02 | 0.06 | 51.21 | 0.29 | 0.01         | 0.24 | 0.73 | 0.22 | 0.48 | 0.06 | 0.02 | 0.12  | 91.87 |
| 1AB-05         | Enamel                        | 692           | 38.27          | 0.03 | 0.02 | 51.11 | 0.23 | 0.03         | 0.27 | 0.66 | 0.21 | 0.44 | 0.08 | 0.04 | 0.29  | 91.67 |
| 1AB-06         | Enamel                        | 865           | 38.08          | 0.01 | 0.01 | 50.83 | 0.36 | 0.03         | 0.31 | 0.87 | 0.19 | 0.42 | 0.09 | 0.03 | 0.32  | 91.52 |
| 1AB-07         | Enamel                        | 1038          | 38.43          | 0.05 | 0.05 | 51.18 | 0.30 | 0.04         | 0.26 | 0.65 | 0.28 | 0.39 | 0.08 | 0.02 | 0.47  | 92.20 |
| 1AB-08         | Enamel                        | 1211          | 38.08          | 0.01 | 0.00 | 50.80 | 0.37 | 0.00         | 0.33 | 0.85 | 0.21 | 0.36 | 0.08 | 0.03 | 0.24  | 91.37 |
| 1AB-09         | Enamel                        | 1384          | 37.22          | 0.04 | 0.06 | 50.62 | 0.39 | 0.02         | 0.34 | 0.89 | 0.20 | 0.34 | 0.10 | 0.04 | 0.37  | 90.64 |
| 1AB-10         | Enamel                        | 1557          | 38.22          | 0.01 | 0.02 | 51.26 | 0.36 | 0.00         | 0.32 | 0.79 | 0.26 | 0.33 | 0.10 | 0.03 | 0.32  | 92.03 |
| 1AB-11         | Enamel                        | 1730          | 37.99          | 0.02 | 0.00 | 50.51 | 0.38 | 0.00         | 0.38 | 0.81 | 0.29 | 0.30 | 0.06 | 0.04 | 0.51  | 91.29 |
| 1AB-12         | Enamel                        | 1903          | 38.07          | 0.00 | 0.00 | 50.77 | 0.40 | 0.04         | 0.38 | 0.95 | 0.29 | 0.28 | 0.08 | 0.03 | 0.13  | 91.40 |
| 1AB-13         | Enamel                        | 2076          | 38.64          | 0.01 | 0.04 | 50.63 | 0.38 | 0.04         | 0.37 | 0.99 | 0.32 | 0.26 | 0.06 | 0.04 | 0.23  | 92.01 |
| 1AB-14         | Enamel                        | 2249          | 37.17          | 0.07 | 0.11 | 49.69 | 0.34 | 0.00         | 0.36 | 0.82 | 0.31 | 0.22 | 0.10 | 0.03 | 1.86  | 91.08 |
| 1AB-15         | Enamel                        | 2422          | 37.65          | 0.02 | 0.00 | 50.20 | 0.44 | 0.00         | 0.41 | 1.11 | 0.33 | 0.21 | 0.05 | 0.04 | 0.65  | 91.11 |
| 1AB-16         | Enamel                        | 2595          | 37.95          | 0.07 | 0.04 | 50.09 | 0.47 | 0.02         | 0.43 | 1.14 | 0.34 | 0.21 | 0.08 | 0.02 | 0.42  | 91.30 |
| 1AB-17         | Enamel                        | 2768          | 37.73          | 0.02 | 0.05 | 49.95 | 0.42 | 0.04         | 0.39 | 1.13 | 0.34 | 0.19 | 0.10 | 0.05 | 0.82  | 91.24 |
| 1AB-18         | Enamel                        | 2941          | 38.24          | 0.09 | 0.08 | 50.29 | 0.38 | 0.00         | 0.40 | 1.22 | 0.35 | 0.19 | 0.22 | 0.06 | 0.20  | 91.71 |
| 1AB-19         | Enamel                        | 3114          | 37.91          | 0.01 | 0.00 | 50.07 | 0.41 | 0.01         | 0.45 | 1.01 | 0.42 | 0.17 | 0.11 | 0.07 | 0.04  | 90.67 |
| 1AB-20         | Enamel                        | 3287          | 38.13          | 0.02 | 0.01 | 49.86 | 0.50 | 0.02         | 0.45 | 1.22 | 0.36 | 0.15 | 0.08 | 0.03 | 0.04  | 90.87 |

| Lake Kikorongo | <i>Hippopotamus amphibius</i> | Molar M3      | Lake Kikorongo |      |      |       |      | Surface find |      |      |      |      |      |      |       |       |
|----------------|-------------------------------|---------------|----------------|------|------|-------|------|--------------|------|------|------|------|------|------|-------|-------|
| Lake Kikorongo | Mineral                       | Distance (µm) | P2O5           | SiO2 | FeO  | CaO   | MgO  | MnO          | SrO  | Na2O | F    | Cl   | SO3  | K2O  | Al2O3 | Total |
| 1CD-01         | Enamel                        | 0             | 37.86          | 0.12 | 0.07 | 50.79 | 0.34 | 0.03         | 0.26 | 0.76 | 0.25 | 0.44 | 0.07 | 0.03 | 0.63  | 91.64 |
| 1CD-02         | Enamel                        | 92            | 38.08          | 0.08 | 0.08 | 50.71 | 0.35 | 0.01         | 0.28 | 0.74 | 0.20 | 0.45 | 0.08 | 0.01 | 0.22  | 91.28 |
| 1CD-03         | Enamel                        | 184           | 38.58          | 0.04 | 0.09 | 51.12 | 0.28 | 0.00         | 0.26 | 0.72 | 0.19 | 0.44 | 0.09 | 0.03 | 0.50  | 92.33 |
| 1CD-04         | Enamel                        | 276           | 38.99          | 0.02 | 0.05 | 51.26 | 0.30 | 0.01         | 0.21 | 0.75 | 0.17 | 0.43 | 0.10 | 0.03 | 0.16  | 92.49 |
| 1CD-05         | Enamel                        | 368           | 37.14          | 0.03 | 0.08 | 50.33 | 0.24 | 0.01         | 0.24 | 0.78 | 0.20 | 0.41 | 0.12 | 0.03 | 0.50  | 90.12 |
| 1CD-06         | Enamel                        | 460           | 37.85          | 0.02 | 0.00 | 50.48 | 0.31 | 0.06         | 0.28 | 0.80 | 0.28 | 0.41 | 0.07 | 0.01 | 0.41  | 90.98 |
| 1CD-07         | Enamel                        | 552           | 36.44          | 0.03 | 0.01 | 49.66 | 0.35 | 0.00         | 0.24 | 0.75 | 0.24 | 0.39 | 0.09 | 0.02 | 1.54  | 89.77 |
| 1CD-08         | Enamel                        | 644           | 37.98          | 0.05 | 0.06 | 50.24 | 0.27 | 0.00         | 0.26 | 0.68 | 0.18 | 0.39 | 0.04 | 0.02 | 0.72  | 90.89 |
| 1CD-09         | Enamel                        | 736           | 39.16          | 0.03 | 0.04 | 50.95 | 0.33 | 0.03         | 0.30 | 0.70 | 0.22 | 0.40 | 0.07 | 0.04 | 0.51  | 92.77 |
| 1CD-10         | Enamel                        | 828           | 38.64          | 0.03 | 0.04 | 51.10 | 0.34 | 0.03         | 0.27 | 0.79 | 0.21 | 0.39 | 0.10 | 0.03 | 0.38  | 92.35 |
| 1CD-11         | Enamel                        | 920           | 37.44          | 0.03 | 0.06 | 50.01 | 0.31 | 0.02         | 0.27 | 0.65 | 0.22 | 0.38 | 0.08 | 0.03 | 1.73  | 91.23 |
| 1CD-12         | Enamel                        | 1012          | 38.56          | 0.01 | 0.02 | 51.23 | 0.36 | 0.00         | 0.29 | 0.67 | 0.30 | 0.37 | 0.08 | 0.03 | 0.48  | 92.39 |
| 1CD-13         | Enamel                        | 1104          | 37.13          | 0.08 | 0.04 | 49.73 | 0.39 | 0.07         | 0.30 | 0.77 | 0.21 | 0.37 | 0.10 | 0.00 | 1.29  | 90.47 |
| 1CD-14         | Enamel                        | 1196          | 37.98          | 0.10 | 0.05 | 50.25 | 0.32 | 0.05         | 0.29 | 0.77 | 0.27 | 0.35 | 0.11 | 0.03 | 1.48  | 92.04 |
| 1CD-15         | Enamel                        | 1288          | 37.98          | 0.02 | 0.03 | 50.42 | 0.37 | 0.00         | 0.30 | 0.70 | 0.23 | 0.36 | 0.11 | 0.03 | 1.08  | 91.63 |
| 1CD-16         | Enamel                        | 1380          | 37.33          | 0.10 | 0.05 | 50.39 | 0.38 | 0.01         | 0.30 | 0.92 | 0.21 | 0.35 | 0.11 | 0.02 | 1.11  | 91.27 |
| 1CD-17         | Enamel                        | 1472          | 37.91          | 0.00 | 0.00 | 50.72 | 0.41 | 0.01         | 0.37 | 0.89 | 0.18 | 0.34 | 0.06 | 0.02 | 0.32  | 91.23 |
| 1CD-18         | Enamel                        | 1564          | 38.72          | 0.12 | 0.01 | 50.96 | 0.41 | 0.03         | 0.33 | 0.86 | 0.22 | 0.33 | 0.05 | 0.02 | 0.24  | 92.31 |
| 1CD-19         | Enamel                        | 1656          | 37.50          | 0.18 | 0.03 | 50.38 | 0.34 | 0.02         | 0.38 | 0.88 | 0.21 | 0.34 | 0.07 | 0.02 | 0.72  | 91.08 |
| 1CD-20         | Enamel                        | 1748          | 37.97          | 0.06 | 0.09 | 50.96 | 0.44 | 0.00         | 0.37 | 0.88 | 0.24 | 0.30 | 0.06 | 0.02 | 0.12  | 91.51 |

| Lake Kikorongo | Mineral | Distance (µm) | <i>Hippopotamus amphibius</i> Molar M3 |      |      | Lake Kikorongo |      |      | Surface find |      |      |      |      |      |       |       |
|----------------|---------|---------------|----------------------------------------|------|------|----------------|------|------|--------------|------|------|------|------|------|-------|-------|
|                |         |               | P2O5                                   | SiO2 | FeO  | CaO            | MgO  | MnO  | SrO          | Na2O | F    | Cl   | SO3  | K2O  | Al2O3 | Total |
| 2AB-01         | Enamel  | 0             | 36.88                                  | 0.03 | 0.00 | 48.08          | 0.28 | 0.03 | 0.34         | 0.79 | 0.45 | 0.57 | 0.05 | 0.03 | 0.01  | 87.54 |
| 2AB-02         | Enamel  | 117           | 37.11                                  | 0.00 | 0.01 | 49.25          | 0.25 | 0.00 | 0.27         | 0.81 | 0.33 | 0.50 | 0.03 | 0.02 | 0.03  | 88.61 |
| 2AB-03         | Enamel  | 234           | 37.39                                  | 0.00 | 0.00 | 49.85          | 0.28 | 0.00 | 0.25         | 0.83 | 0.24 | 0.49 | 0.05 | 0.03 | 0.03  | 89.44 |
| 2AB-04         | Enamel  | 351           | 38.91                                  | 0.02 | 0.00 | 50.64          | 0.36 | 0.00 | 0.28         | 0.83 | 0.19 | 0.47 | 0.06 | 0.01 | 0.00  | 91.77 |
| 2AB-05         | Enamel  | 468           | 38.69                                  | 0.00 | 0.00 | 50.41          | 0.37 | 0.11 | 0.31         | 0.78 | 0.22 | 0.46 | 0.07 | 0.02 | 0.02  | 91.46 |
| 2AB-06         | Enamel  | 585           | 38.52                                  | 0.00 | 0.01 | 51.47          | 0.41 | 0.00 | 0.30         | 0.76 | 0.24 | 0.43 | 0.06 | 0.03 | 0.05  | 92.27 |
| 2AB-07         | Enamel  | 702           | 38.51                                  | 0.00 | 0.00 | 51.21          | 0.39 | 0.01 | 0.32         | 0.87 | 0.16 | 0.40 | 0.05 | 0.04 | 0.02  | 91.99 |
| 2AB-08         | Enamel  | 819           | 39.14                                  | 0.01 | 0.06 | 50.91          | 0.41 | 0.04 | 0.41         | 0.91 | 0.24 | 0.38 | 0.04 | 0.02 | 0.01  | 92.58 |
| 2AB-09         | Enamel  | 936           | 39.09                                  | 0.01 | 0.02 | 50.88          | 0.45 | 0.00 | 0.37         | 1.02 | 0.21 | 0.35 | 0.08 | 0.03 | 0.00  | 92.52 |
| 2AB-10         | Enamel  | 1053          | 38.46                                  | 0.00 | 0.00 | 50.96          | 0.42 | 0.03 | 0.35         | 1.00 | 0.22 | 0.35 | 0.07 | 0.04 | 0.03  | 91.92 |
| 2AB-11         | Enamel  | 1170          | 39.36                                  | 0.01 | 0.05 | 50.96          | 0.44 | 0.03 | 0.34         | 0.98 | 0.20 | 0.34 | 0.05 | 0.03 | 0.00  | 92.80 |
| 2AB-12         | Enamel  | 1287          | 39.11                                  | 0.02 | 0.00 | 50.89          | 0.44 | 0.01 | 0.39         | 1.08 | 0.20 | 0.34 | 0.08 | 0.07 | 0.01  | 92.64 |
| 2AB-13         | Enamel  | 1404          | 39.05                                  | 0.01 | 0.03 | 50.82          | 0.42 | 0.00 | 0.41         | 1.07 | 0.24 | 0.32 | 0.05 | 0.02 | 0.02  | 92.44 |
| 2AB-14         | Enamel  | 1521          | 38.40                                  | 0.01 | 0.00 | 50.85          | 0.46 | 0.01 | 0.40         | 1.18 | 0.18 | 0.29 | 0.07 | 0.04 | 0.00  | 91.89 |
| 2AB-15         | Enamel  | 1638          | 38.65                                  | 0.00 | 0.00 | 50.22          | 0.49 | 0.02 | 0.43         | 1.14 | 0.28 | 0.25 | 0.09 | 0.03 | 0.00  | 91.62 |
| 2AB-16         | Enamel  | 1755          | 38.58                                  | 0.00 | 0.00 | 50.07          | 0.53 | 0.03 | 0.42         | 1.25 | 0.33 | 0.23 | 0.09 | 0.05 | 0.01  | 91.58 |
| 2AB-17         | Enamel  | 1872          | 38.49                                  | 0.00 | 0.04 | 49.91          | 0.48 | 0.02 | 0.42         | 1.27 | 0.30 | 0.24 | 0.08 | 0.05 | 0.03  | 91.34 |
| 2AB-18         | Enamel  | 1989          | 38.11                                  | 0.02 | 0.02 | 49.64          | 0.53 | 0.02 | 0.47         | 1.26 | 0.34 | 0.20 | 0.05 | 0.07 | 0.01  | 90.77 |
| 2AB-19         | Enamel  | 2106          | 34.62                                  | 0.00 | 0.01 | 50.21          | 0.53 | 0.02 | 0.36         | 1.19 | 0.32 | 0.19 | 0.04 | 0.03 | 0.03  | 87.54 |
| 2AB-20         | Enamel  | 2223          | 37.91                                  | 0.00 | 0.00 | 49.52          | 0.52 | 0.00 | 0.46         | 1.38 | 0.33 | 0.17 | 0.08 | 0.06 | 0.03  | 90.46 |
| 2AB-21         | Enamel  | 2340          | 38.01                                  | 0.00 | 0.07 | 49.57          | 0.55 | 0.00 | 0.47         | 1.29 | 0.37 | 0.16 | 0.07 | 0.08 | 0.02  | 90.65 |
| 2AB-22         | Enamel  | 2457          | 37.47                                  | 0.00 | 0.04 | 49.25          | 0.49 | 0.03 | 0.46         | 1.32 | 0.36 | 0.15 | 0.07 | 0.06 | 0.01  | 89.71 |
| 2AB-23         | Enamel  | 2574          | 37.37                                  | 0.03 | 0.00 | 49.30          | 0.64 | 0.00 | 0.55         | 1.46 | 0.34 | 0.12 | 0.06 | 0.05 | 0.02  | 89.93 |
| 2AB-24         | Dentin  | 2691          | 34.54                                  | 0.06 | 0.00 | 49.47          | 0.46 | 0.00 | 0.72         | 1.02 | 1.35 | 0.12 | 0.30 | 0.01 | 0.03  | 88.08 |
| 2AB-25         | Dentin  | 2808          | 32.68                                  | 0.04 | 0.07 | 48.45          | 0.39 | 0.01 | 0.88         | 0.80 | 1.77 | 0.08 | 0.29 | 0.04 | 0.24  | 85.75 |
| 2AB-26         | Dentin  | 2925          | 31.33                                  | 0.02 | 0.00 | 45.81          | 0.39 | 0.07 | 0.78         | 0.91 | 1.44 | 0.09 | 0.26 | 0.05 | 0.03  | 81.17 |
| 2AB-27         | Dentin  | 3042          | 30.82                                  | 0.02 | 0.01 | 46.03          | 0.36 | 0.00 | 0.85         | 1.20 | 1.46 | 0.07 | 0.17 | 0.06 | 0.25  | 81.30 |
| 2AB-28         | Dentin  | 3159          | 30.95                                  | 0.01 | 0.02 | 44.81          | 0.33 | 0.00 | 0.70         | 1.20 | 1.44 | 0.07 | 0.21 | 0.06 | 0.20  | 80.02 |
| 2AB-29         | Dentin  | 3276          | 28.76                                  | 0.07 | 0.02 | 40.88          | 0.29 | 0.00 | 0.59         | 1.03 | 1.13 | 0.06 | 0.15 | 0.07 | 1.13  | 74.18 |
| 2AB-30         | Dentin  | 3393          | 27.61                                  | 0.01 | 0.03 | 40.31          | 0.30 | 0.02 | 0.57         | 0.87 | 0.98 | 0.06 | 0.16 | 0.06 | 3.02  | 74.01 |

| Lake Kikorongo | <i>Hippopotamus amphibius</i> | Molar M3 | Lake Kikorongo |               |      | Surface find |      |      |      |      |      |      |      |      |      |       |
|----------------|-------------------------------|----------|----------------|---------------|------|--------------|------|------|------|------|------|------|------|------|------|-------|
|                |                               |          | Mineral        | Distance (µm) | P2O5 | SiO2         | FeO  | CaO  | MgO  | MnO  | SrO  | Na2O | F    | Cl   | SO3  | K2O   |
| 3AB-01         | Cement                        | 30       | 38.50          | 1.10          | 0.52 | 51.10        | 0.52 | 0.00 | 0.32 | 0.94 | 0.70 | 0.54 | 0.21 | 0.12 | 0.05 | 94.62 |
| 3AB-02         | Enamel                        | 115      | 39.55          | 0.18          | 0.06 | 52.12        | 0.30 | 0.00 | 0.20 | 0.86 | 0.26 | 0.59 | 0.12 | 0.04 | 0.00 | 94.28 |
| 3AB-03         | Enamel                        | 230      | 39.68          | 0.10          | 0.00 | 52.13        | 0.27 | 0.00 | 0.21 | 0.82 | 0.16 | 0.58 | 0.07 | 0.07 | 0.07 | 94.16 |
| 3AB-04         | Enamel                        | 345      | 39.83          | 0.12          | 0.00 | 51.88        | 0.31 | 0.00 | 0.19 | 0.88 | 0.21 | 0.52 | 0.11 | 0.04 | 0.05 | 94.14 |
| 3AB-05         | Enamel                        | 460      | 40.06          | 0.00          | 0.00 | 52.36        | 0.27 | 0.00 | 0.26 | 0.87 | 0.00 | 0.46 | 0.06 | 0.03 | 0.00 | 94.38 |
| 3AB-06         | Enamel                        | 575      | 39.83          | 0.00          | 0.08 | 51.88        | 0.29 | 0.00 | 0.24 | 0.88 | 0.15 | 0.41 | 0.04 | 0.04 | 0.00 | 93.84 |
| 3AB-07         | Enamel                        | 690      | 39.95          | 0.20          | 0.00 | 51.50        | 0.39 | 0.00 | 0.20 | 0.82 | 0.08 | 0.41 | 0.04 | 0.03 | 0.00 | 93.63 |
| 3AB-08         | Enamel                        | 805      | 39.58          | 0.00          | 0.00 | 51.79        | 0.35 | 0.00 | 0.31 | 0.88 | 0.12 | 0.39 | 0.00 | 0.04 | 0.00 | 93.46 |
| 3AB-09         | Enamel                        | 920      | 39.52          | 0.16          | 0.00 | 51.23        | 0.37 | 0.00 | 0.27 | 0.89 | 0.11 | 0.34 | 0.06 | 0.03 | 0.00 | 92.96 |
| 3AB-10         | Enamel                        | 1035     | 39.99          | 0.00          | 0.00 | 51.76        | 0.41 | 0.00 | 0.31 | 1.05 | 0.16 | 0.32 | 0.07 | 0.04 | 0.00 | 94.11 |
| 3AB-11         | Enamel                        | 1150     | 39.96          | 0.00          | 0.00 | 51.13        | 0.38 | 0.00 | 0.30 | 1.00 | 0.08 | 0.30 | 0.10 | 0.03 | 0.00 | 93.26 |
| 3AB-12         | Enamel                        | 1265     | 39.66          | 0.06          | 0.09 | 51.02        | 0.43 | 0.00 | 0.25 | 0.98 | 0.17 | 0.29 | 0.08 | 0.00 | 0.00 | 93.04 |
| 3AB-13         | Enamel                        | 1380     | 39.32          | 0.00          | 0.04 | 51.16        | 0.34 | 0.00 | 0.32 | 0.98 | 0.17 | 0.28 | 0.11 | 0.03 | 0.00 | 92.75 |
| 3AB-14         | Enamel                        | 1495     | 39.35          | 0.00          | 0.00 | 51.10        | 0.38 | 0.00 | 0.27 | 0.92 | 0.15 | 0.26 | 0.05 | 0.04 | 0.11 | 92.61 |
| 3AB-15         | Enamel                        | 1610     | 39.44          | 0.00          | 0.00 | 51.13        | 0.39 | 0.00 | 0.30 | 1.10 | 0.17 | 0.23 | 0.06 | 0.00 | 0.00 | 92.81 |
| 3AB-16         | Enamel                        | 1725     | 39.09          | 0.00          | 0.00 | 51.70        | 0.40 | 0.00 | 0.30 | 1.16 | 0.26 | 0.25 | 0.08 | 0.06 | 0.00 | 93.28 |
| 3AB-17         | Enamel                        | 1840     | 39.91          | 0.07          | 0.00 | 51.12        | 0.36 | 0.00 | 0.29 | 1.11 | 0.16 | 0.22 | 0.05 | 0.04 | 0.00 | 93.33 |
| 3AB-18         | Enamel                        | 1955     | 39.74          | 0.00          | 0.00 | 50.64        | 0.40 | 0.00 | 0.31 | 1.06 | 0.19 | 0.21 | 0.07 | 0.03 | 0.00 | 92.66 |
| 3AB-19         | Enamel                        | 2070     | 39.54          | 0.00          | 0.00 | 50.82        | 0.40 | 0.00 | 0.28 | 1.12 | 0.22 | 0.20 | 0.08 | 0.04 | 0.00 | 92.71 |
| 3AB-20         | Enamel                        | 2185     | 39.46          | 0.00          | 0.00 | 50.42        | 0.38 | 0.00 | 0.32 | 1.21 | 0.21 | 0.21 | 0.04 | 0.05 | 0.00 | 92.32 |
| 3AB-21         | Enamel                        | 2300     | 38.78          | 0.00          | 0.00 | 50.80        | 0.44 | 0.00 | 0.33 | 1.27 | 0.22 | 0.16 | 0.07 | 0.05 | 0.00 | 92.14 |
| 3AB-22         | Enamel                        | 2415     | 38.44          | 0.00          | 0.05 | 49.64        | 0.47 | 0.00 | 0.30 | 1.24 | 0.18 | 0.12 | 0.04 | 0.03 | 0.00 | 90.52 |
| 3AB-23         | Dentin                        | 2530     | 36.42          | 0.20          | 0.30 | 49.95        | 0.84 | 0.08 | 0.57 | 0.82 | 1.02 | 0.11 | 0.28 | 0.06 | 0.03 | 90.69 |
| 3AB-24         | Dentin                        | 2760     | 36.57          | 0.00          | 0.10 | 50.46        | 0.80 | 0.11 | 0.54 | 0.89 | 0.92 | 0.08 | 0.23 | 0.00 | 0.05 | 90.74 |
| 3AB-25         | Dentin                        | 2875     | 37.03          | 0.09          | 0.07 | 50.33        | 0.88 | 0.00 | 0.50 | 0.83 | 0.92 | 0.08 | 0.23 | 0.03 | 0.48 | 91.47 |
| 3AB-26         | Dentin                        | 2990     | 36.35          | 0.00          | 0.13 | 49.13        | 0.82 | 0.14 | 0.55 | 0.89 | 0.98 | 0.07 | 0.20 | 0.03 | 0.44 | 89.72 |
| 3AB-27         | Dentin                        | 3105     | 35.77          | 0.00          | 0.08 | 50.64        | 0.87 | 0.10 | 0.59 | 0.85 | 1.02 | 0.07 | 0.23 | 0.00 | 0.43 | 90.65 |
| 3AB-28         | Dentin                        | 3220     | 36.32          | 0.00          | 0.22 | 49.87        | 0.77 | 0.13 | 0.63 | 0.91 | 0.95 | 0.07 | 0.20 | 0.00 | 0.52 | 90.59 |

| Lake Kikorongo | <i>Hippopotamus amphibius</i> | Molar M3      | Lake Kikorongo |      |      |       |      | Surface find |      |      |      |      |      |      |       |       |
|----------------|-------------------------------|---------------|----------------|------|------|-------|------|--------------|------|------|------|------|------|------|-------|-------|
|                | Mineral                       | Distance (µm) | P2O5           | SiO2 | FeO  | CaO   | MgO  | MnO          | SrO  | Na2O | F    | Cl   | SO3  | K2O  | Al2O3 | Total |
| 1EF-01         | Cement                        | 67            | 33.11          | 1.69 | 0.60 | 49.18 | 1.05 | 0.08         | 0.49 | 1.12 | 0.84 | 0.37 | 0.17 | 0.20 | 0.06  | 88.95 |
| 1EF-02         | Cement                        | 134           | 34.89          | 1.45 | 0.59 | 50.17 | 0.86 | 0.00         | 0.44 | 0.87 | 0.70 | 0.42 | 0.14 | 0.12 | 0.07  | 90.74 |
| 1EF-03         | Cement                        | 268           | 35.81          | 1.07 | 0.40 | 49.36 | 0.67 | 0.07         | 0.37 | 0.82 | 0.52 | 0.47 | 0.11 | 0.10 | 0.08  | 89.83 |
| 1EF-04         | Cement                        | 402           | 37.62          | 0.40 | 0.22 | 49.78 | 0.39 | 0.00         | 0.31 | 0.93 | 0.35 | 0.49 | 0.08 | 0.09 | 0.04  | 90.71 |
| 1EF-05         | Enamel                        | 536           | 37.98          | 0.27 | 0.07 | 49.91 | 0.29 | 0.00         | 0.22 | 0.78 | 0.27 | 0.48 | 0.10 | 0.05 | 0.00  | 90.42 |
| 1EF-06         | Enamel                        | 670           | 38.35          | 0.26 | 0.16 | 50.25 | 0.38 | 0.00         | 0.29 | 0.76 | 0.25 | 0.46 | 0.09 | 0.04 | 0.03  | 91.32 |
| 1EF-07         | Enamel                        | 804           | 38.96          | 0.15 | 0.06 | 51.04 | 0.37 | 0.00         | 0.32 | 0.80 | 0.22 | 0.44 | 0.05 | 0.00 | 0.00  | 92.41 |
| 1EF-08         | Enamel                        | 938           | 38.77          | 0.15 | 0.14 | 50.36 | 0.39 | 0.00         | 0.30 | 0.85 | 0.19 | 0.43 | 0.00 | 0.03 | 0.06  | 91.65 |
| 1EF-09         | Enamel                        | 1072          | 38.37          | 0.12 | 0.00 | 51.09 | 0.40 | 0.00         | 0.37 | 0.84 | 0.19 | 0.39 | 0.08 | 0.05 | 0.06  | 91.94 |
| 1EF-10         | Enamel                        | 1206          | 38.75          | 0.09 | 0.07 | 51.36 | 0.42 | 0.00         | 0.31 | 0.88 | 0.22 | 0.38 | 0.08 | 0.03 | 0.00  | 92.59 |
| 1EF-11         | Enamel                        | 1340          | 38.69          | 0.12 | 0.00 | 50.23 | 0.40 | 0.00         | 0.34 | 0.81 | 0.23 | 0.33 | 0.06 | 0.05 | 0.00  | 91.25 |
| 1EF-12         | Enamel                        | 1474          | 38.53          | 0.10 | 0.05 | 50.63 | 0.41 | 0.00         | 0.38 | 0.86 | 0.24 | 0.32 | 0.06 | 0.04 | 0.04  | 91.66 |
| 1EF-13         | Enamel                        | 1608          | 38.61          | 0.06 | 0.06 | 50.31 | 0.39 | 0.00         | 0.38 | 0.97 | 0.25 | 0.32 | 0.09 | 0.05 | 0.00  | 91.49 |
| 1EF-14         | Enamel                        | 1742          | 38.11          | 0.06 | 0.00 | 50.29 | 0.40 | 0.00         | 0.39 | 0.90 | 0.21 | 0.28 | 0.05 | 0.04 | 0.00  | 90.74 |
| 1EF-15         | Enamel                        | 1876          | 37.62          | 0.00 | 0.00 | 50.45 | 0.44 | 0.00         | 0.38 | 0.96 | 0.24 | 0.28 | 0.06 | 0.03 | 0.00  | 90.48 |
| 1EF-16         | Enamel                        | 2010          | 37.69          | 0.06 | 0.11 | 50.56 | 0.40 | 0.00         | 0.41 | 0.93 | 0.34 | 0.27 | 0.06 | 0.06 | 0.00  | 90.90 |
| 1EF-17         | Enamel                        | 2144          | 38.34          | 0.06 | 0.00 | 50.52 | 0.44 | 0.00         | 0.38 | 0.97 | 0.36 | 0.26 | 0.08 | 0.03 | 0.00  | 91.44 |
| 1EF-18         | Enamel                        | 2278          | 37.70          | 0.05 | 0.10 | 49.67 | 0.41 | 0.00         | 0.40 | 1.11 | 0.33 | 0.29 | 0.08 | 0.08 | 0.03  | 90.24 |
| 1EF-19         | Enamel                        | 2412          | 37.67          | 0.00 | 0.00 | 50.43 | 0.44 | 0.00         | 0.49 | 1.02 | 0.32 | 0.23 | 0.06 | 0.05 | 0.00  | 90.71 |
| 1EF-20         | Enamel                        | 2546          | 37.74          | 0.05 | 0.00 | 49.97 | 0.48 | 0.00         | 0.47 | 1.16 | 0.36 | 0.21 | 0.08 | 0.05 | 0.00  | 90.57 |
| 1EF-21         | Enamel                        | 2680          | 37.73          | 0.00 | 0.06 | 49.73 | 0.44 | 0.00         | 0.48 | 1.05 | 0.34 | 0.21 | 0.08 | 0.03 | 0.00  | 90.15 |
| 1EF-22         | Enamel                        | 2814          | 37.53          | 0.21 | 0.09 | 49.46 | 0.47 | 0.00         | 0.43 | 1.10 | 0.34 | 0.20 | 0.10 | 0.04 | 0.00  | 89.96 |
| 1EF-23         | Enamel                        | 2948          | 38.11          | 0.00 | 0.00 | 49.79 | 0.47 | 0.00         | 0.41 | 1.11 | 0.35 | 0.18 | 0.07 | 0.06 | 0.00  | 90.55 |
| 1EF-24         | Enamel                        | 3082          | 37.92          | 0.05 | 0.04 | 49.37 | 0.63 | 0.00         | 0.52 | 1.19 | 0.33 | 0.16 | 0.06 | 0.06 | 0.00  | 90.34 |
| 1EF-25         | Enamel                        | 3216          | 31.10          | 0.00 | 0.00 | 40.82 | 0.44 | 0.00         | 0.23 | 1.04 | 0.32 | 0.12 | 0.04 | 0.05 | 0.00  | 74.16 |
| 1EF-27         | Dentin                        | 3484          | 21.56          | 0.07 | 0.14 | 50.55 | 3.07 | 0.15         | 0.73 | 0.50 | 1.01 | 0.02 | 0.20 | 0.03 | 1.78  | 79.82 |
| 1EF-28         | Dentin                        | 3618          | 23.13          | 0.00 | 0.00 | 44.77 | 0.48 | 0.08         | 0.54 | 0.56 | 0.97 | 0.02 | 0.15 | 0.00 | 0.25  | 70.94 |
| 1EF-29         | Dentin                        | 3752          | 16.68          | 0.04 | 0.00 | 50.32 | 0.67 | 0.00         | 0.48 | 0.51 | 0.67 | 0.00 | 0.10 | 0.00 | 0.40  | 69.87 |

| Lake Kikorongo | Mineral | Distance (µm) | <i>Hippopotamus amphibius</i> |      |      | Molar M3 |      |      | Lake Kikorongo |      |      | Surface find |      |      |       |       | Total |
|----------------|---------|---------------|-------------------------------|------|------|----------|------|------|----------------|------|------|--------------|------|------|-------|-------|-------|
|                |         |               | P2O5                          | SiO2 | FeO  | CaO      | MgO  | MnO  | SrO            | Na2O | F    | Cl           | SO3  | K2O  | Al2O3 |       |       |
| 4AB-01         | Enamel  | 60            | 39.97                         | 0.06 | 0.09 | 52.95    | 0.31 | 0.00 | 0.22           | 0.85 | 0.16 | 0.52         | 0.07 | 0.05 | 0.03  | 95.27 |       |
| 4AB-02         | Enamel  | 121           | 39.72                         | 0.00 | 0.00 | 52.30    | 0.29 | 0.00 | 0.21           | 0.81 | 0.10 | 0.48         | 0.09 | 0.03 | 0.04  | 94.09 |       |
| 4AB-03         | Enamel  | 242           | 39.57                         | 0.05 | 0.05 | 52.88    | 0.29 | 0.00 | 0.22           | 0.89 | 0.13 | 0.44         | 0.07 | 0.03 | 0.00  | 94.62 |       |
| 4AB-04         | Enamel  | 363           | 40.25                         | 0.07 | 0.04 | 52.39    | 0.33 | 0.00 | 0.17           | 0.85 | 0.17 | 0.42         | 0.00 | 0.04 | 0.00  | 94.75 |       |
| 4AB-05         | Enamel  | 484           | 40.04                         | 0.00 | 0.00 | 52.13    | 0.29 | 0.00 | 0.26           | 0.83 | 0.18 | 0.40         | 0.07 | 0.04 | 0.19  | 94.42 |       |
| 4AB-06         | Enamel  | 605           | 39.47                         | 0.00 | 0.00 | 51.75    | 0.33 | 0.00 | 0.26           | 0.90 | 0.14 | 0.40         | 0.00 | 0.03 | 0.03  | 93.31 |       |
| 4AB-07         | Enamel  | 726           | 39.73                         | 0.04 | 0.00 | 52.38    | 0.38 | 0.00 | 0.22           | 0.91 | 0.09 | 0.39         | 0.07 | 0.03 | 0.04  | 94.28 |       |
| 4AB-08         | Enamel  | 847           | 40.35                         | 0.00 | 0.06 | 51.94    | 0.34 | 0.00 | 0.24           | 0.85 | 0.12 | 0.36         | 0.10 | 0.03 | 0.00  | 94.39 |       |
| 4AB-09         | Enamel  | 968           | 39.88                         | 0.00 | 0.00 | 52.52    | 0.37 | 0.09 | 0.28           | 0.90 | 0.12 | 0.36         | 0.10 | 0.03 | 0.00  | 94.64 |       |
| 4AB-10         | Enamel  | 1089          | 40.40                         | 0.00 | 0.00 | 51.73    | 0.37 | 0.00 | 0.24           | 0.85 | 0.16 | 0.34         | 0.09 | 0.03 | 0.00  | 94.22 |       |
| 4AB-11         | Enamel  | 1210          | 40.16                         | 0.04 | 0.00 | 52.04    | 0.39 | 0.00 | 0.24           | 0.88 | 0.13 | 0.32         | 0.06 | 0.03 | 0.05  | 94.35 |       |
| 4AB-12         | Enamel  | 1331          | 39.85                         | 0.00 | 0.00 | 51.50    | 0.36 | 0.00 | 0.21           | 0.94 | 0.13 | 0.30         | 0.07 | 0.03 | 0.04  | 93.41 |       |
| 4AB-13         | Enamel  | 1452          | 39.43                         | 0.00 | 0.00 | 52.00    | 0.43 | 0.00 | 0.27           | 0.90 | 0.19 | 0.33         | 0.05 | 0.03 | 0.03  | 93.66 |       |
| 4AB-14         | Enamel  | 1573          | 39.66                         | 0.00 | 0.05 | 51.28    | 0.44 | 0.00 | 0.21           | 0.97 | 0.19 | 0.28         | 0.07 | 0.02 | 0.00  | 93.17 |       |
| 4AB-15         | Enamel  | 1694          | 39.29                         | 0.07 | 0.08 | 51.96    | 0.38 | 0.00 | 0.24           | 1.02 | 0.18 | 0.28         | 0.07 | 0.06 | 0.06  | 93.69 |       |
| 4AB-16         | Enamel  | 1815          | 39.45                         | 0.00 | 0.05 | 51.47    | 0.39 | 0.00 | 0.25           | 1.00 | 0.17 | 0.27         | 0.08 | 0.03 | 0.07  | 93.20 |       |
| 4AB-17         | Enamel  | 1936          | 39.25                         | 0.06 | 0.09 | 51.32    | 0.42 | 0.00 | 0.22           | 1.00 | 0.15 | 0.26         | 0.09 | 0.03 | 0.06  | 92.96 |       |
| 4AB-18         | Enamel  | 2057          | 38.89                         | 0.00 | 0.00 | 51.03    | 0.39 | 0.00 | 0.22           | 1.14 | 0.14 | 0.26         | 0.13 | 0.03 | 0.16  | 92.39 |       |
| 4AB-19         | Enamel  | 2178          | 38.57                         | 0.07 | 0.00 | 51.53    | 0.43 | 0.00 | 0.25           | 1.04 | 0.25 | 0.27         | 0.08 | 0.00 | 0.66  | 93.15 |       |
| 4AB-20         | Enamel  | 2299          | 38.96                         | 0.05 | 0.00 | 51.58    | 0.37 | 0.00 | 0.20           | 1.01 | 0.19 | 0.25         | 0.09 | 0.00 | 0.15  | 92.86 |       |
| 4AB-21         | Enamel  | 2420          | 38.41                         | 0.00 | 0.08 | 51.00    | 0.42 | 0.00 | 0.22           | 1.05 | 0.16 | 0.23         | 0.09 | 0.04 | 0.35  | 92.05 |       |
| 4AB-22         | Enamel  | 2541          | 38.83                         | 0.03 | 0.00 | 52.01    | 0.42 | 0.00 | 0.30           | 1.10 | 0.14 | 0.22         | 0.07 | 0.03 | 0.09  | 93.25 |       |
| 4AB-23         | Enamel  | 2662          | 0.00                          | 0.00 | 0.00 | 0.00     | 0.00 | 0.00 | 0.00           | 0.00 | 0.00 | 0.00         | 0.00 | 0.00 | 0.00  | 0.00  |       |
| 4AB-24         | Enamel  | 2783          | 23.13                         | 0.12 | 0.34 | 62.11    | 4.62 | 0.36 | 0.40           | 1.01 | 0.16 | 0.13         | 0.16 | 0.06 | 0.07  | 92.68 |       |
| 4AB-25         | Enamel  | 2904          | 39.04                         | 0.00 | 0.00 | 51.26    | 0.40 | 0.00 | 0.23           | 1.00 | 0.20 | 0.21         | 0.09 | 0.04 | 0.08  | 92.57 |       |
| 4AB-26         | Enamel  | 3025          | 39.25                         | 0.05 | 0.00 | 51.29    | 0.37 | 0.00 | 0.26           | 1.08 | 0.21 | 0.20         | 0.08 | 0.03 | 0.09  | 92.90 |       |
| 4AB-27         | Enamel  | 3146          | 37.83                         | 0.05 | 0.00 | 49.68    | 0.38 | 0.00 | 0.25           | 1.19 | 0.23 | 0.15         | 0.06 | 0.03 | 0.06  | 89.90 |       |
| 4AB-28         | Dentin  | 3267          | 36.10                         | 0.31 | 0.52 | 50.69    | 0.82 | 0.00 | 0.48           | 0.89 | 0.97 | 0.15         | 0.30 | 0.03 | 0.07  | 91.34 |       |
| 4AB-29         | Dentin  | 3388          | 36.94                         | 0.17 | 0.22 | 50.61    | 0.82 | 0.00 | 0.54           | 0.80 | 0.95 | 0.14         | 0.26 | 0.04 | 0.19  | 91.67 |       |

| Lake Kikorongo | Mineral | Distance (µm) | <i>Hippopotamus amphibius</i> Molar M3 |      |      | Lake Kikorongo |      |      | Surface find |      |      |      |      |      |       |       |
|----------------|---------|---------------|----------------------------------------|------|------|----------------|------|------|--------------|------|------|------|------|------|-------|-------|
|                |         |               | P2O5                                   | SiO2 | FeO  | CaO            | MgO  | MnO  | SrO          | Na2O | F    | Cl   | SO3  | K2O  | Al2O3 | Total |
| 4CD-01         | Enamel  | 61            | 38.81                                  | 0.44 | 0.23 | 51.46          | 0.35 | 0.00 | 0.23         | 0.71 | 0.50 | 0.57 | 0.09 | 0.06 | 0.05  | 93.51 |
| 4CD-02         | Enamel  | 102           | 38.59                                  | 0.09 | 0.10 | 51.76          | 0.33 | 0.00 | 0.20         | 0.76 | 0.37 | 0.54 | 0.10 | 0.04 | 0.04  | 92.93 |
| 4CD-03         | Enamel  | 204           | 39.25                                  | 0.38 | 0.09 | 52.22          | 0.35 | 0.00 | 0.21         | 0.80 | 0.22 | 0.54 | 0.07 | 0.00 | 0.00  | 94.13 |
| 4CD-04         | Enamel  | 306           | 39.82                                  | 0.00 | 0.06 | 51.70          | 0.39 | 0.00 | 0.31         | 0.74 | 0.16 | 0.49 | 0.09 | 0.02 | 0.00  | 93.79 |
| 4CD-05         | Enamel  | 408           | 39.62                                  | 0.00 | 0.00 | 52.09          | 0.35 | 0.00 | 0.23         | 0.81 | 0.22 | 0.46 | 0.09 | 0.04 | 0.00  | 93.90 |
| 4CD-06         | Enamel  | 510           | 39.50                                  | 0.06 | 0.06 | 51.60          | 0.31 | 0.00 | 0.21         | 0.99 | 0.18 | 0.44 | 0.10 | 0.04 | 0.00  | 93.47 |
| 4CD-07         | Enamel  | 612           | 39.60                                  | 0.00 | 0.00 | 51.69          | 0.39 | 0.00 | 0.27         | 0.90 | 0.19 | 0.39 | 0.05 | 0.03 | 0.00  | 93.51 |
| 4CD-08         | Enamel  | 714           | 39.53                                  | 0.04 | 0.00 | 51.29          | 0.39 | 0.00 | 0.29         | 0.87 | 0.12 | 0.36 | 0.07 | 0.00 | 0.00  | 92.97 |
| 4CD-09         | Enamel  | 816           | 38.91                                  | 0.04 | 0.00 | 50.97          | 0.40 | 0.00 | 0.32         | 0.82 | 0.21 | 0.35 | 0.10 | 0.03 | 0.00  | 92.15 |
| 4CD-10         | Enamel  | 918           | 38.74                                  | 0.04 | 0.00 | 52.15          | 0.41 | 0.00 | 0.25         | 0.89 | 0.25 | 0.33 | 0.09 | 0.00 | 0.00  | 93.15 |
| 4CD-11         | Enamel  | 1020          | 38.97                                  | 0.03 | 0.06 | 51.51          | 0.49 | 0.00 | 0.29         | 0.99 | 0.22 | 0.30 | 0.09 | 0.03 | 0.00  | 93.00 |
| 4CD-12         | Enamel  | 1122          | 38.72                                  | 0.00 | 0.06 | 50.73          | 0.52 | 0.00 | 0.29         | 1.00 | 0.23 | 0.28 | 0.11 | 0.05 | 0.00  | 91.98 |
| 4CD-13         | Enamel  | 1224          | 38.58                                  | 0.00 | 0.00 | 51.28          | 0.49 | 0.00 | 0.31         | 1.11 | 0.26 | 0.26 | 0.10 | 0.06 | 0.00  | 92.44 |
| 4CD-14         | Enamel  | 1326          | 38.48                                  | 0.00 | 0.00 | 50.60          | 0.45 | 0.00 | 0.32         | 1.08 | 0.19 | 0.26 | 0.11 | 0.03 | 0.00  | 91.51 |
| 4CD-15         | Enamel  | 1428          | 38.75                                  | 0.00 | 0.00 | 51.72          | 0.65 | 0.00 | 0.39         | 1.05 | 0.25 | 0.26 | 0.09 | 0.04 | 0.00  | 93.19 |
| 4CD-16         | Enamel  | 1530          | 38.98                                  | 0.00 | 0.00 | 50.43          | 0.53 | 0.00 | 0.38         | 1.11 | 0.26 | 0.25 | 0.08 | 0.02 | 0.05  | 92.10 |
| 4CD-17         | Enamel  | 1632          | 38.76                                  | 0.00 | 0.05 | 50.88          | 0.61 | 0.00 | 0.41         | 1.08 | 0.25 | 0.24 | 0.07 | 0.03 | 0.00  | 92.38 |
| 4CD-18         | Enamel  | 1734          | 37.42                                  | 0.00 | 0.00 | 48.98          | 0.47 | 0.00 | 0.37         | 1.03 | 0.37 | 0.20 | 0.00 | 0.02 | 0.00  | 88.88 |
| 4CD-19         | Enamel  | 1836          | 37.34                                  | 0.00 | 0.00 | 50.12          | 0.64 | 0.00 | 0.36         | 1.15 | 0.26 | 0.21 | 0.12 | 0.03 | 0.00  | 90.23 |
| 4CD-20         | Enamel  | 1938          | 38.68                                  | 0.00 | 0.00 | 51.66          | 0.60 | 0.00 | 0.35         | 1.15 | 0.26 | 0.21 | 0.07 | 0.03 | 0.00  | 93.03 |
| 4CD-21         | Enamel  | 2040          | 38.81                                  | 0.00 | 0.00 | 50.94          | 0.52 | 0.11 | 0.41         | 1.21 | 0.24 | 0.19 | 0.06 | 0.03 | 0.03  | 92.54 |
| 4CD-22         | Enamel  | 2142          | 38.57                                  | 0.00 | 0.00 | 50.81          | 0.54 | 0.00 | 0.44         | 1.25 | 0.39 | 0.19 | 0.05 | 0.00 | 0.14  | 92.38 |
| 4CD-23         | Enamel  | 2244          | 38.10                                  | 0.00 | 0.12 | 51.02          | 0.56 | 0.00 | 0.38         | 1.14 | 0.27 | 0.17 | 0.08 | 0.05 | 0.00  | 91.89 |
| 4CD-24         | Enamel  | 2346          | 38.59                                  | 0.00 | 0.09 | 51.38          | 0.50 | 0.00 | 0.38         | 1.18 | 0.30 | 0.17 | 0.12 | 0.00 | 0.04  | 92.76 |
| 4CD-25         | Enamel  | 2448          | 39.13                                  | 0.00 | 0.00 | 50.98          | 0.53 | 0.08 | 0.34         | 1.24 | 0.31 | 0.17 | 0.07 | 0.05 | 0.00  | 92.90 |
| 4CD-26         | Enamel  | 2550          | 38.92                                  | 0.00 | 0.06 | 50.61          | 0.48 | 0.00 | 0.36         | 1.16 | 0.34 | 0.15 | 0.07 | 0.05 | 0.00  | 92.20 |
| 4CD-27         | Enamel  | 2652          | 38.61                                  | 0.04 | 0.00 | 50.90          | 0.44 | 0.00 | 0.35         | 1.32 | 0.25 | 0.14 | 0.05 | 0.02 | 0.00  | 92.12 |
| 4CD-28         | Enamel  | 2754          | 36.00                                  | 0.03 | 0.00 | 47.49          | 0.53 | 0.07 | 0.40         | 1.43 | 0.56 | 0.09 | 0.08 | 0.05 | 0.00  | 86.74 |
| 4CD-29         | Dentin  | 2856          | 33.67                                  | 0.10 | 0.31 | 52.50          | 1.21 | 0.14 | 0.69         | 0.93 | 1.12 | 0.06 | 0.27 | 0.03 | 0.03  | 91.07 |
| 4CD-30         | Dentin  | 2958          | 34.87                                  | 0.00 | 0.11 | 50.26          | 0.48 | 0.00 | 0.64         | 1.08 | 1.24 | 0.05 | 0.22 | 0.05 | 0.00  | 89.00 |

| Lake Kikorongo | Mineral | Distance (µm) | P2O5  | SiO2 | FeO  | CaO   | MgO  | MnO  | SrO  | Na2O | F    | Cl   | SO3  | K2O  | Al2O3 | Total |
|----------------|---------|---------------|-------|------|------|-------|------|------|------|------|------|------|------|------|-------|-------|
| 5AB-01         | Enamel  | 0.00          | 39.18 | 0.06 | 0.09 | 51.92 | 0.30 | 0.01 | 0.22 | 0.84 | 0.15 | 0.51 | 0.07 | 0.05 | 0.03  | 93.41 |
| 5AB-02         | Enamel  | 0.00          | 39.80 | 0.00 | 0.00 | 52.42 | 0.30 | 0.00 | 0.21 | 0.81 | 0.10 | 0.48 | 0.09 | 0.04 | 0.04  | 94.29 |
| 5AB-03         | Enamel  | 0.00          | 38.95 | 0.05 | 0.05 | 52.06 | 0.29 | 0.00 | 0.22 | 0.87 | 0.13 | 0.43 | 0.06 | 0.03 | 0.03  | 93.16 |
| 5AB-04         | Enamel  | 0.00          | 39.77 | 0.07 | 0.04 | 51.76 | 0.33 | 0.01 | 0.17 | 0.84 | 0.16 | 0.42 | 0.04 | 0.04 | 0.03  | 93.68 |
| 5AB-05         | Enamel  | 0.00          | 39.77 | 0.01 | 0.01 | 51.78 | 0.29 | 0.00 | 0.26 | 0.82 | 0.18 | 0.40 | 0.07 | 0.04 | 0.19  | 93.80 |
| 5AB-06         | Enamel  | 0.00          | 39.51 | 0.02 | 0.00 | 51.81 | 0.33 | 0.02 | 0.26 | 0.90 | 0.13 | 0.40 | 0.02 | 0.03 | 0.03  | 93.46 |
| 5AB-07         | Enamel  | 0.00          | 38.92 | 0.04 | 0.02 | 51.32 | 0.37 | 0.00 | 0.22 | 0.90 | 0.09 | 0.38 | 0.07 | 0.03 | 0.04  | 92.39 |
| 5AB-08         | Enamel  | 0.00          | 39.90 | 0.02 | 0.06 | 51.37 | 0.34 | 0.00 | 0.23 | 0.84 | 0.12 | 0.35 | 0.10 | 0.03 | 0.01  | 93.37 |
| 5AB-09         | Enamel  | 0.00          | 39.38 | 0.00 | 0.00 | 51.87 | 0.37 | 0.09 | 0.27 | 0.89 | 0.11 | 0.36 | 0.10 | 0.03 | 0.01  | 93.48 |
| 5AB-10         | Enamel  | 0.00          | 40.15 | 0.00 | 0.03 | 51.42 | 0.37 | 0.03 | 0.24 | 0.84 | 0.15 | 0.34 | 0.09 | 0.03 | 0.03  | 93.72 |
| 5AB-11         | Enamel  | 0.00          | 39.71 | 0.04 | 0.00 | 51.47 | 0.38 | 0.00 | 0.24 | 0.87 | 0.13 | 0.32 | 0.06 | 0.03 | 0.05  | 93.30 |
| 5AB-12         | Enamel  | 0.00          | 39.85 | 0.02 | 0.00 | 51.51 | 0.36 | 0.00 | 0.21 | 0.94 | 0.12 | 0.30 | 0.07 | 0.03 | 0.04  | 93.44 |
| 5AB-13         | Enamel  | 0.00          | 38.95 | 0.00 | 0.00 | 51.37 | 0.43 | 0.00 | 0.27 | 0.89 | 0.19 | 0.32 | 0.05 | 0.03 | 0.03  | 92.52 |
| 5AB-14         | Enamel  | 0.00          | 39.45 | 0.01 | 0.05 | 51.03 | 0.44 | 0.00 | 0.21 | 0.97 | 0.19 | 0.28 | 0.07 | 0.02 | 0.01  | 92.73 |
| 5AB-15         | Enamel  | 0.00          | 38.69 | 0.07 | 0.07 | 51.19 | 0.38 | 0.00 | 0.24 | 1.01 | 0.18 | 0.27 | 0.07 | 0.06 | 0.06  | 92.27 |
| 5AB-16         | Enamel  | 0.00          | 39.24 | 0.00 | 0.05 | 51.22 | 0.39 | 0.04 | 0.24 | 0.99 | 0.16 | 0.27 | 0.08 | 0.03 | 0.07  | 92.77 |
| 5AB-17         | Enamel  | 0.00          | 38.96 | 0.06 | 0.09 | 50.95 | 0.42 | 0.02 | 0.22 | 0.99 | 0.14 | 0.26 | 0.09 | 0.03 | 0.06  | 92.30 |
| 5AB-18         | Enamel  | 0.00          | 38.72 | 0.03 | 0.03 | 50.83 | 0.39 | 0.02 | 0.22 | 1.14 | 0.14 | 0.25 | 0.13 | 0.03 | 0.16  | 92.08 |
| 5AB-19         | Enamel  | 0.00          | 37.87 | 0.07 | 0.01 | 50.62 | 0.42 | 0.02 | 0.25 | 1.02 | 0.24 | 0.26 | 0.08 | 0.02 | 0.65  | 91.53 |
| 5AB-20         | Enamel  | 0.00          | 38.67 | 0.05 | 0.01 | 51.22 | 0.37 | 0.00 | 0.20 | 1.00 | 0.19 | 0.25 | 0.09 | 0.01 | 0.15  | 92.21 |
| 5AB-21         | Enamel  | 0.00          | 38.36 | 0.03 | 0.08 | 50.95 | 0.42 | 0.00 | 0.22 | 1.05 | 0.15 | 0.23 | 0.09 | 0.04 | 0.35  | 91.96 |
| 5AB-22         | Enamel  | 0.00          | 37.96 | 0.03 | 0.00 | 50.85 | 0.41 | 0.00 | 0.29 | 1.08 | 0.13 | 0.21 | 0.07 | 0.03 | 0.09  | 91.17 |
| 5AB-23         | Enamel  | 0.00          | 39.00 | 0.05 | 0.00 | 50.73 | 0.41 | 0.02 | 0.26 | 1.08 | 0.21 | 0.21 | 0.13 | 0.05 | 0.25  | 92.38 |
| 5AB-24         | Enamel  | 0.00          | 17.66 | 0.10 | 0.26 | 47.46 | 3.53 | 0.28 | 0.31 | 0.77 | 0.12 | 0.10 | 0.12 | 0.04 | 0.05  | 70.80 |
| 5AB-25         | Enamel  | 0.00          | 38.65 | 0.00 | 0.01 | 50.77 | 0.40 | 0.03 | 0.22 | 0.99 | 0.20 | 0.21 | 0.09 | 0.04 | 0.08  | 91.68 |
| 5AB-26         | Enamel  | 0.00          | 38.73 | 0.05 | 0.00 | 50.62 | 0.37 | 0.00 | 0.25 | 1.06 | 0.21 | 0.20 | 0.07 | 0.03 | 0.09  | 91.68 |
| 5AB-27         | Enamel  | 0.00          | 38.71 | 0.05 | 0.00 | 50.85 | 0.39 | 0.00 | 0.25 | 1.22 | 0.23 | 0.16 | 0.07 | 0.03 | 0.06  | 92.00 |
| 5AB-28         | Dentin  | 0.00          | 35.20 | 0.30 | 0.50 | 49.45 | 0.80 | 0.03 | 0.47 | 0.87 | 0.93 | 0.15 | 0.30 | 0.03 | 0.07  | 89.10 |
| 5AB-29         | Dentin  | 0.00          | 36.34 | 0.17 | 0.21 | 49.81 | 0.80 | 0.02 | 0.53 | 0.78 | 0.93 | 0.14 | 0.26 | 0.04 | 0.19  | 90.21 |
| 5AB-30         | Dentin  | 0.00          | 36.28 | 0.10 | 0.29 | 50.31 | 0.84 | 0.00 | 0.47 | 0.82 | 0.99 | 0.11 | 0.26 | 0.03 | 0.05  | 90.54 |



| Lake Kikorongo | Mineral | Distance (µm) | P2O5  | SiO2 | FeO  | CaO   | MgO  | MnO  | SrO  | Na2O | F    | Cl   | SO3  | K2O  | Al2O3 | Total |
|----------------|---------|---------------|-------|------|------|-------|------|------|------|------|------|------|------|------|-------|-------|
| 4CD-01         | Enamel  | 0.00          | 38.41 | 0.43 | 0.23 | 50.95 | 0.35 | 0.01 | 0.23 | 0.71 | 0.49 | 0.56 | 0.09 | 0.06 | 0.05  | 92.57 |
| 4CD-02         | Enamel  | 0.00          | 38.34 | 0.09 | 0.10 | 51.45 | 0.33 | 0.06 | 0.20 | 0.75 | 0.36 | 0.54 | 0.10 | 0.04 | 0.04  | 92.40 |
| 4CD-03         | Enamel  | 0.00          | 38.28 | 0.37 | 0.09 | 50.95 | 0.34 | 0.04 | 0.20 | 0.78 | 0.21 | 0.53 | 0.07 | 0.01 | 0.03  | 91.90 |
| 4CD-04         | Enamel  | 0.00          | 39.51 | 0.03 | 0.06 | 51.33 | 0.39 | 0.00 | 0.31 | 0.73 | 0.16 | 0.49 | 0.09 | 0.02 | 0.02  | 93.14 |
| 4CD-05         | Enamel  | 0.00          | 39.11 | 0.03 | 0.04 | 51.45 | 0.34 | 0.04 | 0.22 | 0.80 | 0.21 | 0.46 | 0.09 | 0.04 | 0.00  | 92.84 |
| 4CD-06         | Enamel  | 0.00          | 39.26 | 0.06 | 0.06 | 51.31 | 0.31 | 0.00 | 0.20 | 0.98 | 0.18 | 0.44 | 0.10 | 0.04 | 0.00  | 92.93 |
| 4CD-07         | Enamel  | 0.00          | 39.15 | 0.02 | 0.00 | 51.14 | 0.38 | 0.01 | 0.27 | 0.89 | 0.19 | 0.39 | 0.05 | 0.03 | 0.02  | 92.53 |
| 4CD-08         | Enamel  | 0.00          | 39.31 | 0.04 | 0.00 | 51.04 | 0.39 | 0.04 | 0.29 | 0.87 | 0.12 | 0.36 | 0.07 | 0.02 | 0.03  | 92.57 |
| 4CD-09         | Enamel  | 0.00          | 38.83 | 0.04 | 0.02 | 50.90 | 0.40 | 0.04 | 0.32 | 0.81 | 0.21 | 0.35 | 0.10 | 0.03 | 0.00  | 92.07 |
| 4CD-10         | Enamel  | 0.00          | 37.89 | 0.04 | 0.03 | 51.04 | 0.41 | 0.03 | 0.25 | 0.87 | 0.24 | 0.33 | 0.09 | 0.02 | 0.00  | 91.23 |
| 4CD-11         | Enamel  | 0.00          | 38.63 | 0.03 | 0.06 | 51.09 | 0.49 | 0.00 | 0.29 | 0.98 | 0.22 | 0.30 | 0.09 | 0.03 | 0.00  | 92.21 |
| 4CD-12         | Enamel  | 0.00          | 38.73 | 0.03 | 0.06 | 50.78 | 0.52 | 0.00 | 0.29 | 1.00 | 0.23 | 0.28 | 0.11 | 0.05 | 0.01  | 92.08 |
| 4CD-13         | Enamel  | 0.00          | 37.99 | 0.00 | 0.01 | 50.52 | 0.49 | 0.00 | 0.30 | 1.09 | 0.25 | 0.26 | 0.09 | 0.06 | 0.01  | 91.07 |
| 4CD-14         | Enamel  | 0.00          | 38.45 | 0.01 | 0.00 | 50.61 | 0.45 | 0.00 | 0.32 | 1.08 | 0.18 | 0.26 | 0.11 | 0.04 | 0.01  | 91.51 |
| 4CD-15         | Enamel  | 0.00          | 37.66 | 0.03 | 0.00 | 50.30 | 0.63 | 0.00 | 0.38 | 1.02 | 0.24 | 0.25 | 0.09 | 0.04 | 0.01  | 90.63 |
| 4CD-16         | Enamel  | 0.00          | 39.04 | 0.00 | 0.00 | 50.53 | 0.54 | 0.01 | 0.38 | 1.11 | 0.26 | 0.25 | 0.08 | 0.03 | 0.05  | 92.27 |
| 4CD-17         | Enamel  | 0.00          | 38.23 | 0.03 | 0.05 | 50.22 | 0.60 | 0.00 | 0.40 | 1.07 | 0.24 | 0.24 | 0.07 | 0.03 | 0.01  | 91.19 |
| 4CD-18         | Enamel  | 0.00          | 38.47 | 0.00 | 0.00 | 50.41 | 0.49 | 0.00 | 0.38 | 1.06 | 0.38 | 0.21 | 0.03 | 0.03 | 0.02  | 91.47 |
| 4CD-19         | Enamel  | 0.00          | 37.62 | 0.00 | 0.03 | 50.54 | 0.65 | 0.01 | 0.36 | 1.16 | 0.26 | 0.21 | 0.12 | 0.03 | 0.00  | 91.00 |
| 4CD-20         | Enamel  | 0.00          | 37.62 | 0.03 | 0.03 | 50.29 | 0.59 | 0.00 | 0.34 | 1.12 | 0.25 | 0.21 | 0.07 | 0.03 | 0.01  | 90.59 |
| 4CD-21         | Enamel  | 0.00          | 38.60 | 0.00 | 0.04 | 50.70 | 0.52 | 0.11 | 0.40 | 1.21 | 0.23 | 0.19 | 0.06 | 0.03 | 0.03  | 92.12 |
| 4CD-22         | Enamel  | 0.00          | 38.22 | 0.00 | 0.00 | 50.39 | 0.53 | 0.06 | 0.43 | 1.24 | 0.38 | 0.18 | 0.05 | 0.02 | 0.14  | 91.66 |
| 4CD-23         | Enamel  | 0.00          | 37.88 | 0.02 | 0.12 | 50.78 | 0.56 | 0.00 | 0.38 | 1.13 | 0.26 | 0.17 | 0.08 | 0.05 | 0.00  | 91.42 |
| 4CD-24         | Enamel  | 0.00          | 37.82 | 0.02 | 0.09 | 50.41 | 0.49 | 0.00 | 0.37 | 1.16 | 0.29 | 0.17 | 0.12 | 0.01 | 0.04  | 90.99 |
| 4CD-25         | Enamel  | 0.00          | 38.65 | 0.00 | 0.02 | 50.40 | 0.53 | 0.08 | 0.34 | 1.23 | 0.30 | 0.17 | 0.07 | 0.05 | 0.01  | 91.84 |
| 4CD-26         | Enamel  | 0.00          | 38.79 | 0.02 | 0.06 | 50.49 | 0.48 | 0.01 | 0.36 | 1.16 | 0.33 | 0.15 | 0.07 | 0.05 | 0.00  | 91.98 |
| 4CD-27         | Enamel  | 0.00          | 38.21 | 0.04 | 0.04 | 50.42 | 0.44 | 0.00 | 0.35 | 1.31 | 0.24 | 0.14 | 0.05 | 0.02 | 0.01  | 91.28 |
| 4CD-28         | Enamel  | 0.00          | 37.85 | 0.03 | 0.00 | 49.99 | 0.56 | 0.08 | 0.42 | 1.51 | 0.58 | 0.09 | 0.08 | 0.05 | 0.01  | 91.26 |
| 4CD-29         | Dentin  | 0.00          | 31.73 | 0.10 | 0.29 | 49.53 | 1.14 | 0.13 | 0.65 | 0.87 | 1.04 | 0.06 | 0.26 | 0.03 | 0.03  | 85.86 |
| 4CD-30         | Dentin  | 0.00          | 35.17 | 0.02 | 0.11 | 50.74 | 0.48 | 0.07 | 0.65 | 1.09 | 1.23 | 0.05 | 0.22 | 0.05 | 0.02  | 89.90 |

| Lake Kikorongo | Mineral | Distance (µm) | P2O5  | SiO2 | FeO  | CaO   | MgO   | MnO  | SrO  | Na2O | F    | Cl   | SO3  | K2O  | Al2O3 | Total |
|----------------|---------|---------------|-------|------|------|-------|-------|------|------|------|------|------|------|------|-------|-------|
| 3AB-01         | Enamel  | 50            | 38.32 | 1.08 | 0.51 | 50.19 | 0.51  | 0.06 | 0.31 | 0.92 | 0.68 | 0.53 | 0.20 | 0.12 | 0.05  | 93.47 |
| 3AB-02         | Enamel  | 115           | 39.76 | 0.17 | 0.06 | 51.75 | 0.30  | 0.00 | 0.20 | 0.85 | 0.25 | 0.58 | 0.12 | 0.04 | 0.01  | 94.10 |
| 3AB-03         | Enamel  | 230           | 39.83 | 0.10 | 0.00 | 51.75 | 0.27  | 0.01 | 0.21 | 0.81 | 0.16 | 0.57 | 0.07 | 0.07 | 0.07  | 93.92 |
| 3AB-04         | Enamel  | 345           | 39.95 | 0.12 | 0.01 | 51.50 | 0.31  | 0.00 | 0.19 | 0.87 | 0.21 | 0.51 | 0.11 | 0.04 | 0.05  | 93.86 |
| 3AB-05         | Enamel  | 460           | 39.99 | 0.02 | 0.02 | 51.78 | 0.27  | 0.00 | 0.26 | 0.86 | 0.06 | 0.45 | 0.06 | 0.03 | 0.00  | 93.81 |
| 3AB-06         | Enamel  | 575           | 40.15 | 0.00 | 0.08 | 51.87 | 0.29  | 0.00 | 0.24 | 0.88 | 0.15 | 0.40 | 0.04 | 0.04 | 0.00  | 94.16 |
| 3AB-07         | Enamel  | 690           | 40.09 | 0.20 | 0.00 | 51.29 | 0.39  | 0.00 | 0.20 | 0.81 | 0.08 | 0.41 | 0.04 | 0.03 | 0.02  | 93.57 |
| 3AB-08         | Enamel  | 805           | 39.68 | 0.00 | 0.00 | 51.59 | 0.35  | 0.01 | 0.31 | 0.88 | 0.12 | 0.38 | 0.04 | 0.04 | 0.00  | 93.39 |
| 3AB-09         | Enamel  | 920           | 39.73 | 0.16 | 0.00 | 51.23 | 0.37  | 0.02 | 0.27 | 0.88 | 0.11 | 0.33 | 0.06 | 0.03 | 0.02  | 93.21 |
| 3AB-10         | Enamel  | 1035          | 39.49 | 0.01 | 0.01 | 50.88 | 0.40  | 0.00 | 0.30 | 1.03 | 0.16 | 0.31 | 0.06 | 0.04 | 0.02  | 92.74 |
| 3AB-11         | Enamel  | 1150          | 40.27 | 0.00 | 0.04 | 51.35 | 0.38  | 0.00 | 0.30 | 1.00 | 0.08 | 0.30 | 0.10 | 0.03 | 0.01  | 93.86 |
| 3AB-12         | Enamel  | 1265          | 39.72 | 0.06 | 0.09 | 50.96 | 0.43  | 0.00 | 0.25 | 0.98 | 0.17 | 0.29 | 0.08 | 0.01 | 0.01  | 93.06 |
| 3AB-13         | Enamel  | 1380          | 39.35 | 0.02 | 0.04 | 51.13 | 0.34  | 0.00 | 0.32 | 0.98 | 0.17 | 0.28 | 0.11 | 0.03 | 0.03  | 92.80 |
| 3AB-14         | Enamel  | 1495          | 39.31 | 0.00 | 0.00 | 51.01 | 0.37  | 0.02 | 0.27 | 0.91 | 0.15 | 0.26 | 0.05 | 0.04 | 0.11  | 92.50 |
| 3AB-15         | Enamel  | 1610          | 39.23 | 0.00 | 0.01 | 50.87 | 0.39  | 0.00 | 0.30 | 1.10 | 0.16 | 0.23 | 0.05 | 0.01 | 0.03  | 92.38 |
| 3AB-16         | Enamel  | 1725          | 38.73 | 0.04 | 0.03 | 51.29 | 0.39  | 0.00 | 0.30 | 1.15 | 0.25 | 0.25 | 0.07 | 0.06 | 0.02  | 92.59 |
| 3AB-17         | Enamel  | 1840          | 39.69 | 0.07 | 0.02 | 50.96 | 0.36  | 0.00 | 0.29 | 1.11 | 0.16 | 0.22 | 0.05 | 0.04 | 0.03  | 93.00 |
| 3AB-18         | Enamel  | 1955          | 39.84 | 0.01 | 0.03 | 50.93 | 0.41  | 0.01 | 0.31 | 1.07 | 0.20 | 0.21 | 0.07 | 0.03 | 0.00  | 93.12 |
| 3AB-19         | Enamel  | 2070          | 39.31 | 0.02 | 0.02 | 50.73 | 0.40  | 0.00 | 0.28 | 1.12 | 0.22 | 0.20 | 0.08 | 0.04 | 0.02  | 92.44 |
| 3AB-20         | Enamel  | 2185          | 39.39 | 0.00 | 0.02 | 50.60 | 0.39  | 0.01 | 0.32 | 1.22 | 0.21 | 0.21 | 0.05 | 0.05 | 0.00  | 92.47 |
| 3AB-21         | Enamel  | 2300          | 38.57 | 0.00 | 0.03 | 50.85 | 0.44  | 0.04 | 0.33 | 1.28 | 0.22 | 0.16 | 0.07 | 0.05 | 0.03  | 92.08 |
| 3AB-22         | Enamel  | 2415          | 38.86 | 0.00 | 0.05 | 50.53 | 0.48  | 0.00 | 0.31 | 1.27 | 0.18 | 0.12 | 0.04 | 0.03 | 0.02  | 91.90 |
| 3AB-23         | Dentin  | 2530          | 36.14 | 0.21 | 0.30 | 49.96 | 0.84  | 0.09 | 0.57 | 0.82 | 1.02 | 0.11 | 0.28 | 0.06 | 0.03  | 90.43 |
| 3AB-24         | Dentin  | 2645          | 0.15  | 0.06 | 0.04 | 29.88 | 19.27 | 0.00 | 0.71 | 0.23 | 0.14 | 0.01 | 0.04 | 0.03 | 0.20  | 50.79 |
| 3AB-25         | Dentin  | 2760          | 36.13 | 0.02 | 0.10 | 50.34 | 0.80  | 0.11 | 0.54 | 0.89 | 0.92 | 0.08 | 0.23 | 0.02 | 0.05  | 90.21 |
| 3AB-26         | Dentin  | 2875          | 36.30 | 0.09 | 0.07 | 49.88 | 0.87  | 0.05 | 0.49 | 0.83 | 0.92 | 0.08 | 0.23 | 0.03 | 0.48  | 90.33 |
| 3AB-27         | Dentin  | 2990          | 36.62 | 0.02 | 0.13 | 50.08 | 0.84  | 0.14 | 0.57 | 0.91 | 1.01 | 0.07 | 0.20 | 0.03 | 0.45  | 91.07 |
| 3AB-28         | Dentin  | 3105          | 34.93 | 0.04 | 0.08 | 50.07 | 0.86  | 0.10 | 0.59 | 0.85 | 1.01 | 0.07 | 0.23 | 0.02 | 0.42  | 89.28 |
| 3AB-29         | Dentin  | 3220          | 35.84 | 0.03 | 0.22 | 49.88 | 0.78  | 0.13 | 0.63 | 0.92 | 0.96 | 0.07 | 0.20 | 0.02 | 0.52  | 90.20 |
| 3AB-30         | Dentin  | 3335          | 35.77 | 0.04 | 0.12 | 49.84 | 0.79  | 0.12 | 0.59 | 1.01 | 0.96 | 0.07 | 0.19 | 0.03 | 0.62  | 90.17 |

| Lake Kikorongo | Mineral | Distance (µm) | P2O5  | SiO2 | FeO  | CaO   | MgO  | MnO  | SrO  | Na2O | F    | Cl   | SO3  | K2O  | Al2O3 | Total |
|----------------|---------|---------------|-------|------|------|-------|------|------|------|------|------|------|------|------|-------|-------|
| 1EF-01         | Cement  | 50            | 33.38 | 1.68 | 0.60 | 49.16 | 1.05 | 0.08 | 0.49 | 1.12 | 0.83 | 0.37 | 0.17 | 0.20 | 0.06  | 89.17 |
| 1EF-02         | Cement  | 134           | 34.73 | 1.43 | 0.58 | 49.55 | 0.85 | 0.00 | 0.44 | 0.86 | 0.69 | 0.42 | 0.14 | 0.12 | 0.06  | 89.88 |
| 1EF-03         | Cement  | 268           | 36.73 | 1.09 | 0.40 | 50.28 | 0.68 | 0.07 | 0.37 | 0.83 | 0.53 | 0.48 | 0.11 | 0.10 | 0.08  | 91.76 |
| 1EF-04         | Cement  | 402           | 37.84 | 0.40 | 0.22 | 49.75 | 0.39 | 0.00 | 0.31 | 0.93 | 0.35 | 0.49 | 0.08 | 0.09 | 0.04  | 90.90 |
| 1EF-05         | Cement  | 536           | 38.71 | 0.27 | 0.08 | 50.56 | 0.30 | 0.02 | 0.23 | 0.78 | 0.28 | 0.48 | 0.10 | 0.05 | 0.02  | 91.87 |
| 1EF-06         | Cement  | 670           | 38.59 | 0.26 | 0.16 | 50.30 | 0.38 | 0.00 | 0.29 | 0.76 | 0.25 | 0.46 | 0.09 | 0.04 | 0.04  | 91.61 |
| 1EF-07         | Enamel  | 804           | 39.11 | 0.15 | 0.06 | 51.00 | 0.37 | 0.00 | 0.32 | 0.80 | 0.22 | 0.44 | 0.05 | 0.02 | 0.00  | 92.53 |
| 1EF-08         | Enamel  | 938           | 39.71 | 0.15 | 0.14 | 51.36 | 0.40 | 0.00 | 0.30 | 0.87 | 0.19 | 0.44 | 0.02 | 0.03 | 0.06  | 93.66 |
| 1EF-09         | Enamel  | 1072          | 38.83 | 0.12 | 0.02 | 51.53 | 0.40 | 0.00 | 0.37 | 0.85 | 0.19 | 0.40 | 0.08 | 0.05 | 0.06  | 92.89 |
| 1EF-10         | Enamel  | 1206          | 39.06 | 0.09 | 0.07 | 51.63 | 0.42 | 0.00 | 0.31 | 0.89 | 0.22 | 0.38 | 0.08 | 0.03 | 0.01  | 93.19 |
| 1EF-11         | Enamel  | 1340          | 39.82 | 0.12 | 0.04 | 51.59 | 0.41 | 0.00 | 0.35 | 0.83 | 0.23 | 0.34 | 0.06 | 0.05 | 0.02  | 93.85 |
| 1EF-12         | Enamel  | 1474          | 38.92 | 0.10 | 0.05 | 51.05 | 0.42 | 0.00 | 0.38 | 0.87 | 0.24 | 0.33 | 0.06 | 0.04 | 0.04  | 92.50 |
| 1EF-13         | Enamel  | 1608          | 39.24 | 0.06 | 0.06 | 51.07 | 0.40 | 0.00 | 0.39 | 0.99 | 0.25 | 0.32 | 0.09 | 0.05 | 0.00  | 92.91 |
| 1EF-14         | Enamel  | 1742          | 38.95 | 0.06 | 0.00 | 51.37 | 0.41 | 0.01 | 0.40 | 0.92 | 0.22 | 0.29 | 0.06 | 0.04 | 0.00  | 92.72 |
| 1EF-15         | Enamel  | 1876          | 38.20 | 0.02 | 0.03 | 51.23 | 0.45 | 0.04 | 0.39 | 0.98 | 0.24 | 0.29 | 0.06 | 0.03 | 0.01  | 91.98 |
| 1EF-16         | Enamel  | 2010          | 38.01 | 0.06 | 0.11 | 51.01 | 0.41 | 0.02 | 0.42 | 0.94 | 0.34 | 0.27 | 0.06 | 0.06 | 0.00  | 91.71 |
| 1EF-17         | Enamel  | 2144          | 38.58 | 0.06 | 0.02 | 50.90 | 0.44 | 0.00 | 0.38 | 0.98 | 0.36 | 0.26 | 0.08 | 0.03 | 0.01  | 92.11 |
| 1EF-18         | Enamel  | 2278          | 38.67 | 0.05 | 0.11 | 51.03 | 0.42 | 0.00 | 0.41 | 1.14 | 0.33 | 0.29 | 0.08 | 0.08 | 0.03  | 92.66 |
| 1EF-19         | Enamel  | 2412          | 37.88 | 0.03 | 0.00 | 50.84 | 0.45 | 0.04 | 0.49 | 1.03 | 0.32 | 0.23 | 0.06 | 0.05 | 0.00  | 91.43 |
| 1EF-20         | Enamel  | 2546          | 38.23 | 0.05 | 0.00 | 50.78 | 0.48 | 0.00 | 0.48 | 1.17 | 0.37 | 0.22 | 0.08 | 0.05 | 0.02  | 91.93 |
| 1EF-21         | Enamel  | 2680          | 38.30 | 0.04 | 0.06 | 50.67 | 0.45 | 0.00 | 0.49 | 1.07 | 0.35 | 0.21 | 0.09 | 0.03 | 0.03  | 91.78 |
| 1EF-22         | Enamel  | 2814          | 38.00 | 0.21 | 0.09 | 50.29 | 0.48 | 0.04 | 0.43 | 1.12 | 0.34 | 0.20 | 0.10 | 0.04 | 0.01  | 91.36 |
| 1EF-23         | Enamel  | 2948          | 38.25 | 0.03 | 0.01 | 50.22 | 0.47 | 0.00 | 0.42 | 1.12 | 0.36 | 0.19 | 0.07 | 0.06 | 0.00  | 91.19 |
| 1EF-24         | Enamel  | 3082          | 38.39 | 0.06 | 0.04 | 50.27 | 0.64 | 0.00 | 0.53 | 1.21 | 0.33 | 0.17 | 0.07 | 0.06 | 0.02  | 91.79 |
| 1EF-25         | Enamel  | 3216          | 38.24 | 0.01 | 0.03 | 50.50 | 0.54 | 0.00 | 0.29 | 1.28 | 0.39 | 0.15 | 0.05 | 0.06 | 0.02  | 91.58 |
| 1EF-26         | Dentin  | 3350          | 9.07  | 0.01 | 0.03 | 45.59 | 6.14 | 0.06 | 0.48 | 0.42 | 0.46 | 0.03 | 0.09 | 0.05 | 0.24  | 62.67 |
| 1EF-27         | Dentin  | 3484          | 20.13 | 0.06 | 0.13 | 47.54 | 2.89 | 0.15 | 0.69 | 0.47 | 0.96 | 0.02 | 0.19 | 0.03 | 1.67  | 74.93 |
| 1EF-28         | Dentin  | 3618          | 26.07 | 0.03 | 0.03 | 50.85 | 0.55 | 0.09 | 0.61 | 0.63 | 1.11 | 0.02 | 0.17 | 0.00 | 0.29  | 80.44 |
| 1EF-29         | Dentin  | 3752          | 16.88 | 0.05 | 0.00 | 51.35 | 0.69 | 0.05 | 0.49 | 0.53 | 0.69 | 0.01 | 0.10 | 0.02 | 0.41  | 71.24 |
| 1EF-30         | Dentin  | 3886          | 16.31 | 0.07 | 0.13 | 50.33 | 1.45 | 0.13 | 0.46 | 0.42 | 0.61 | 0.01 | 0.16 | 0.01 | 0.15  | 70.23 |
